# Supplementary material for: Apicobasal Surfaceome Architecture Encodes for Polarized Epithelial Functionality and Depends on Tumor Suppressor PTEN
Source: MDPI journal article supplement (doi:10.3390/ijms232416193), 2022-12-19
Supplement: s1 [file s1]

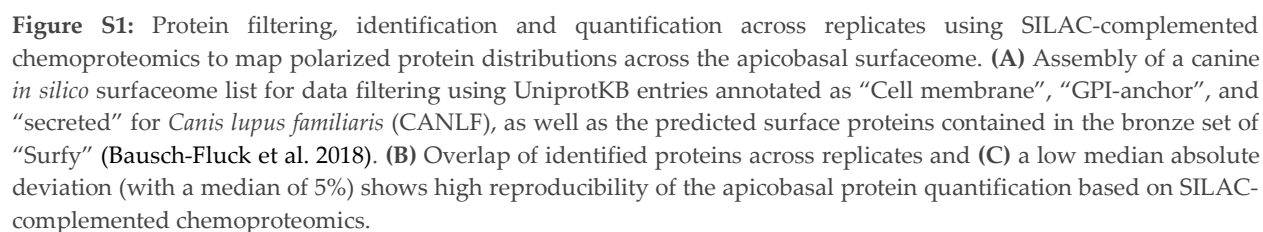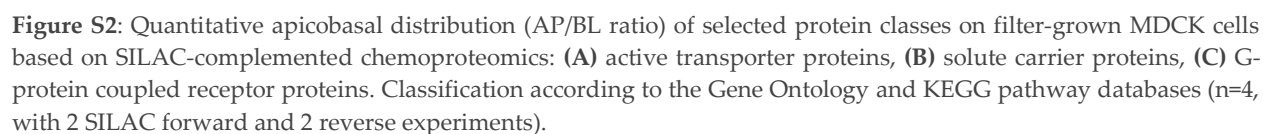

**Table S1:** List of all cell surface proteins quantified across the apicobasal surfaceome of filter-grown MDCK cells based on SILAC-complemented chemoproteomics. Apicobasal protein distribution is presented as apical fraction (AP) of the apicobasal protein pool [AP/(AP+BL)] across 4 replicates (2 fw=SILAC forward; 2 rv=SILAC reverse experiments), where “NaN” represents non-detected/quantified proteins in a specific replicate and variation is given as median absolute deviation (MAD). Colour-scale indicates descending apical fraction from red to green.

| Gene name     | Uniprot ID | AP Median | AP fw1 | AP fw2 | AP rv1 | AP rv2 | MAD   |
|---------------|------------|-----------|--------|--------|--------|--------|-------|
| ABCB6         | F1PRH1     | 0.465     | 0.377  | 0.462  | 0.469  | 0.495  | 0.031 |
| ABCC3         | J9NY13     | 0.252     | 0.110  | 0.243  | 0.261  | 0.260  | 0.042 |
| ACAT1         | F1PC58     | 0.568     | 0.563  | 0.582  | 0.505  | 0.573  | 0.022 |
| ACE2          | J9P7Y2     | 0.908     | 0.901  | 0.889  | 0.915  | 0.940  | 0.016 |
| ACSF2         | F1PTR3     | 0.470     | 0.521  | 0.477  | 0.436  | 0.463  | 0.025 |
| ADAM10        | F1PGR0     | 0.244     | 0.246  | 0.236  | 0.243  | 0.255  | 0.005 |
| ADAM17        | F1PFZ9     | 0.291     | 0.361  | 0.294  | 0.281  | 0.287  | 0.022 |
| ADAM28        | F1PRX8     | 0.363     | 0.000  | 0.346  | 0.379  | 0.430  | 0.116 |
| ADAM9         | J9P4T2     | 0.389     | 0.409  | 0.417  | 0.352  | 0.370  | 0.026 |
| AGPAT1        | E2RCA0     | 0.497     | 0.519  | 0.495  | 0.467  | 0.498  | 0.014 |
| AGRN          | F1Q2Z6     | 0.257     | 0.204  | 0.178  | 0.310  | 0.382  | 0.078 |
| ANO6          | J9NZU1     | 0.193     | 0.112  | 0.174  | 0.236  | 0.212  | 0.040 |
| ANXA2         | Q6TEQ7     | 0.535     | 0.575  | 0.577  | 0.446  | 0.496  | 0.052 |
| APMAP         | E2RPE9     | 0.635     | 0.478  | 0.580  | 0.694  | 0.690  | 0.081 |
| ASAH1         | F1PWA9     | 0.557     | 0.416  | 0.557  | NaN    | 0.664  | 0.082 |
| ATP13A1       | F1PRS5     | 0.432     | 0.560  | 0.000  | NaN    | 0.432  | 0.187 |
| ATP1A1        | J9NZA9     | 0.169     | 0.172  | 0.167  | 0.171  | 0.166  | 0.002 |
| ATP1A2        | F1PL53     | 0.000     | 0.000  | 0.000  | 0.195  | NaN    | 0.065 |
| ATP1B1        | P06583     | 0.136     | 0.148  | 0.112  | 0.124  | 0.150  | 0.016 |
| ATP1B3        | F1Q0S2     | 0.146     | 0.136  | 0.156  | 0.110  | 0.216  | 0.032 |
| ATP2B4        | F1PHQ7     | 0.375     | 0.524  | 0.427  | 0.231  | 0.322  | 0.100 |
| B2M           | E2RN10     | 0.221     | 0.234  | 0.259  | 0.208  | 0.205  | 0.020 |
| BCAM          | J9P3V6     | 0.213     | 0.213  | 0.204  | 0.212  | 0.219  | 0.004 |
| BCHE          | F1PEN8     | 0.376     | 0.548  | NaN    | NaN    | 0.204  | 0.172 |
| BMPRI1A       | E2QW66     | 0.000     | NaN    | NaN    | 0.000  | 0.000  | 0.000 |
| BMPRI2        | F1PCC1     | 0.000     | NaN    | NaN    | 0.000  | 0.000  | 0.000 |
| BSG           | E2QZT4     | 0.130     | 0.170  | 0.144  | 0.092  | 0.116  | 0.027 |
| BST1          | E2RJT2     | 0.908     | 0.904  | 0.898  | 0.912  | 0.958  | 0.017 |
| BST2          | J9NVI2     | 0.652     | 0.711  | 0.689  | 0.545  | 0.614  | 0.060 |
| CA12          | F1Q440     | 0.243     | 0.220  | 0.141  | 0.266  | 0.338  | 0.061 |
| CA14          | F1P7K9     | 0.369     | 0.383  | 0.369  | 0.369  | 0.256  | 0.032 |
| CADM1         | F1P6Z9     | 0.203     | 0.202  | 0.204  | 0.189  | 0.234  | 0.012 |
| CALU          | E2RN38     | 0.894     | 0.474  | 1.000  | 1.000  | 0.788  | 0.184 |
| CANX          | P24643     | 0.535     | 0.543  | 0.645  | 0.526  | 0.513  | 0.037 |
| CAV1          | P33724     | 0.538     | 0.600  | 0.564  | 0.490  | 0.512  | 0.041 |
| CAV2          | O46550     | 0.529     | 0.510  | 0.513  | 0.563  | 0.545  | 0.021 |
| CD109         | F1PM26     | 0.586     | 0.451  | 0.393  | 0.757  | 0.721  | 0.158 |
| CD14 (607076) | A0A1S7J0A8 | 1.000     | NaN    | NaN    | 1.000  | 1.000  | 0.000 |
| CD151         | J9P4E7     | 0.244     | 0.311  | 0.252  | 0.236  | 0.231  | 0.024 |
| CD276         | F1PDP5     | 0.213     | 0.212  | 0.241  | 0.213  | 0.210  | 0.008 |
| CD302         | F1PGD5     | 0.499     | 0.502  | 0.488  | 0.497  | 0.530  | 0.012 |
| CD40          | G1K297     | 0.256     | 0.316  | 0.312  | 0.179  | 0.199  | 0.062 |
| CD44          | J9P423     | 0.217     | 0.213  | 0.214  | 0.220  | 0.265  | 0.014 |
| CD47          | J9P735     | 0.581     | 0.545  | 0.596  | 0.566  | 1.000  | 0.121 |
| CD55          | F1PCI2     | 0.125     | NaN    | NaN    | 0.249  | 0.000  | 0.125 |
| CD58          | F1PBA0     | 0.097     | 0.047  | 0.074  | 0.121  | 0.135  | 0.034 |
| CD59          | J9P4N4     | 0.732     | 0.738  | 0.773  | 0.697  | 0.726  | 0.022 |
| CD63          | F1PIT4     | 0.507     | 0.699  | 0.718  | 0.314  | 0.250  | 0.213 |
| CD74          | E2RF90     | 0.334     | 0.257  | 0.328  | 0.340  | 0.345  | 0.025 |
| CD81          | F1PB66     | 0.027     | 0.000  | 0.000  | 0.055  | 0.106  | 0.040 |
| CD82          | J9P9V8     | 0.353     | 0.000  | 0.484  | 0.293  | 0.413  | 0.151 |
| CD9           | F1PQM7     | 0.342     | 0.400  | 0.362  | 0.298  | 0.322  | 0.035 |

|          |        |       |       |       |       |       |       |
|----------|--------|-------|-------|-------|-------|-------|-------|
| CD99     | J9PA14 | 0.258 | 0.253 | 0.263 | 0.267 | 0.250 | 0.007 |
| CDC42    | P60952 | 0.456 | 0.180 | 0.265 | 0.763 | 0.647 | 0.241 |
| CDCP1    | F1PV63 | 0.357 | 0.333 | 0.307 | 0.381 | 0.426 | 0.042 |
| CDH1     | F1PAA4 | 0.196 | 0.195 | 0.171 | 0.219 | 0.197 | 0.013 |
| CDH10    | E2R858 | 0.231 | 0.000 | 0.224 | 0.239 | 0.319 | 0.083 |
| CDH16    | E2REV2 | 0.176 | 0.201 | 0.176 | 0.167 | 0.177 | 0.009 |
| CDH17    | J9NTL4 | 0.521 | 0.469 | 0.457 | 0.573 | 0.576 | 0.056 |
| CDH3     | F1PAA3 | 0.098 | 0.000 | 0.000 | 0.197 | 0.355 | 0.138 |
| CDH6     | E2R0Z0 | 0.418 | 0.413 | 0.402 | 0.428 | 0.424 | 0.009 |
| CEACAM1  | Q004B2 | 0.956 | 0.904 | 0.965 | 0.988 | 0.947 | 0.025 |
| CELSR1   | F1PLY1 | 0.453 | 0.548 | 0.450 | 0.456 | 0.415 | 0.035 |
| CELSR2   | E2R4F0 | 0.329 | 0.350 | 0.331 | 0.286 | 0.327 | 0.017 |
| CENPV    | F1PH09 | 0.519 | 0.382 | 0.425 | 0.629 | 0.612 | 0.108 |
| CEPT1    | E2QV13 | 1.000 | 1.000 | NaN   | 0.459 | 1.000 | 0.180 |
| CLDN1    | J9P0K9 | 0.424 | 0.458 | 0.460 | 0.000 | 0.390 | 0.132 |
| CLDN2    | Q95KM6 | 0.400 | 0.483 | 0.446 | 0.301 | 0.353 | 0.069 |
| CLDN3    | Q95KM5 | 0.371 | 0.429 | 0.456 | 0.286 | 0.314 | 0.071 |
| CLDN4    | E2RNC2 | 0.217 | 0.184 | 0.294 | 0.250 | 0.041 | 0.080 |
| CLDN7    | E2R5S3 | 0.101 | 0.202 | 0.000 | NaN   | NaN   | 0.101 |
| CLDND1   | F1PYH4 | 0.063 | 0.125 | 0.000 | NaN   | NaN   | 0.063 |
| CLEC7A   | E2RFU8 | 0.385 | 0.379 | 0.390 | 0.340 | 0.399 | 0.018 |
| CLU      | P25473 | 0.639 | 0.640 | 0.600 | 0.654 | 0.639 | 0.014 |
| CNNM3    | E2RGW9 | 0.000 | 0.000 | 0.000 | NaN   | 0.000 | 0.000 |
| CNNM4    | F1PJ05 | 0.143 | 0.189 | 0.140 | 0.118 | 0.145 | 0.019 |
| COL18A1  | F6V3U7 | 0.176 | 0.105 | 0.084 | 0.344 | 0.247 | 0.101 |
| COL4A1   | Q28271 | 0.424 | 0.266 | 0.237 | 0.618 | 0.581 | 0.174 |
| COL4A2   | F1Q129 | 0.366 | 0.172 | 0.077 | 0.718 | 0.560 | 0.257 |
| CP       | F1PAX2 | 0.839 | 0.824 | 0.842 | 0.837 | 0.851 | 0.008 |
| CPM      | F1PGL5 | 0.634 | 0.661 | 0.669 | 0.566 | 0.608 | 0.039 |
| CRELD1   | F1PD72 | 0.613 | 0.630 | 0.596 | 0.732 | 0.535 | 0.058 |
| CRIM1    | E2R003 | 0.000 | 0.000 | 0.000 | 0.000 | 0.285 | 0.071 |
| CS       | F1PV92 | 0.487 | 0.551 | 0.539 | 0.402 | 0.436 | 0.063 |
| CTNNA1   | B6V8E6 | 0.453 | 0.515 | 0.317 | 0.490 | 0.416 | 0.068 |
| CTSA     | F1P9I9 | 0.504 | 0.362 | 0.428 | 0.580 | 0.582 | 0.093 |
| CTSB     | E2R6Q7 | 0.464 | 0.506 | 0.357 | 0.426 | 0.502 | 0.056 |
| CTSD     | Q4LAL9 | 0.458 | 0.479 | 0.499 | 0.378 | 0.437 | 0.041 |
| CTSH     | F6X9C1 | 0.187 | NaN   | 0.000 | NaN   | 0.374 | 0.187 |
| CTSS     | Q8HY81 | 0.489 | NaN   | 0.000 | 0.489 | 0.556 | 0.185 |
| CTS2     | F1PIF2 | 0.433 | 0.000 | 0.530 | 0.407 | 0.459 | 0.145 |
| CXADR    | F1P992 | 0.296 | 0.325 | 0.289 | 0.266 | 0.302 | 0.018 |
| CYB5R1   | E2RF18 | 0.530 | 0.663 | 0.565 | 0.416 | 0.496 | 0.079 |
| CYP20A1  | F1PLQ3 | 0.495 | 0.493 | 0.490 | 0.498 | 0.545 | 0.015 |
| DAG1     | Q9TSZ6 | 0.375 | 0.340 | 0.325 | 0.503 | 0.411 | 0.062 |
| DAO      | E2QV61 | 0.580 | 0.539 | 0.696 | 0.618 | 0.542 | 0.058 |
| DCBLD2   | F1PVX2 | 0.451 | 0.443 | 0.436 | 0.472 | 0.459 | 0.013 |
| DDO      | F1PAL6 | 0.512 | 0.531 | 0.599 | 0.426 | 0.493 | 0.053 |
| DDR1     | F1PGJ7 | 0.289 | 0.278 | 0.296 | 0.282 | 0.318 | 0.013 |
| DDX17    | F1PID8 | 0.517 | 0.445 | 0.504 | 0.543 | 0.530 | 0.031 |
| DHCR7    | E2RNQ5 | 0.497 | 0.564 | 0.568 | 0.351 | 0.431 | 0.088 |
| dhcr4    | Q0E9S7 | 0.556 | 0.385 | 0.567 | 0.546 | 0.566 | 0.050 |
| DNAJC10  | E2RCY4 | 0.484 | 0.000 | 0.546 | 0.496 | 0.471 | 0.143 |
| DNASE1L1 | F1PWT3 | 0.670 | 0.684 | 0.694 | 0.592 | 0.655 | 0.033 |
| DPEP1    | E2R4I6 | 1.000 | NaN   | 1.000 | 1.000 | 1.000 | 0.000 |
| DSC2     | F1PEF1 | 0.251 | 0.251 | 0.246 | 0.252 | 0.256 | 0.003 |
| DSC3     | F1PEF0 | 0.402 | 0.391 | 0.425 | 0.413 | 0.376 | 0.018 |
| DSG2     | F1PGX2 | 0.476 | 0.518 | 0.502 | 0.450 | 0.438 | 0.033 |
| ECE1     | F1PK66 | 0.000 | 0.000 | 0.000 | 0.203 | 0.000 | 0.051 |
| EFNA1    | E2QUE4 | 0.177 | 0.191 | 0.000 | 0.296 | 0.163 | 0.081 |
| EFNB1    | E2QS85 | 0.434 | 0.382 | 0.397 | 0.486 | 0.472 | 0.045 |
| EGF      | J9NZ75 | 0.533 | 0.553 | 0.792 | 0.506 | 0.512 | 0.082 |
| EGFR     | F1PF03 | 0.401 | 0.417 | 0.386 | 0.399 | 0.403 | 0.009 |
| ELOVL1   | E2RGY9 | 0.533 | 0.553 | 0.514 | 0.563 | 0.464 | 0.035 |
| EMC1     | F1PN78 | 0.545 | NaN   | 0.618 | 0.545 | 0.219 | 0.133 |
| ENPEP    | F6XRM5 | 1.000 | 1.000 | 1.000 | 1.000 | 1.000 | 0.000 |
| ENPP6    | F1PZF9 | 1.000 | 1.000 | 1.000 | 1.000 | 0.835 | 0.041 |
| ENTPD3   | E2RE57 | 0.826 | 0.819 | 0.815 | 0.834 | 0.864 | 0.016 |

|          |        |       |       |       |       |       |       |
|----------|--------|-------|-------|-------|-------|-------|-------|
| EPCAM    | F1PM51 | 0.177 | 0.164 | 0.165 | 0.229 | 0.189 | 0.022 |
| EPHA1    | E2R6A6 | 0.147 | 0.085 | 0.112 | 0.183 | 0.193 | 0.045 |
| EPHA2    | F1Q4C5 | 0.345 | 0.338 | 0.403 | 0.348 | 0.342 | 0.018 |
| EPHB2    | F1PAF1 | 0.357 | 0.380 | 0.329 | 0.406 | 0.333 | 0.031 |
| EPHB4    | F1PRQ8 | 0.358 | 0.383 | 0.357 | 0.358 | 0.308 | 0.019 |
| ERBB2    | F1PIQ9 | 0.255 | 0.256 | 0.236 | 0.253 | 0.267 | 0.009 |
| ERBB3    | F1PVC5 | 0.112 | 0.000 | 0.064 | 0.179 | 0.159 | 0.068 |
| ERBB4    | F1PQ05 | 0.289 | 0.091 | 0.313 | 0.581 | 0.265 | 0.134 |
| ERGIC3   | E2QW07 | 0.644 | NaN   | 0.644 | 1.000 | 0.000 | 0.333 |
| ERMP1    | F1PSG1 | 0.505 | 0.521 | 0.489 | 0.545 | 0.433 | 0.036 |
| ERP29    | J9P4L2 | 0.582 | 0.621 | 0.722 | 0.542 | 0.544 | 0.064 |
| ESRP1    | F1PSN8 | 0.383 | 0.383 | 0.511 | 0.303 | NaN   | 0.069 |
| F11R     | F1PP71 | 0.221 | 0.209 | 0.206 | 0.244 | 0.234 | 0.016 |
| FAM171A2 | J9P3H5 | 0.182 | 0.233 | 0.073 | 0.131 | 0.272 | 0.075 |
| FAS      | F1P7Q7 | 0.209 | 0.285 | 0.133 | 0.063 | 0.328 | 0.104 |
| FCGRT    | E2R0L6 | 0.000 | 0.000 | 0.000 | 0.000 | 0.000 | 0.000 |
| FGFR2    | F1PPD8 | 0.270 | 0.293 | 0.127 | 0.264 | 0.276 | 0.045 |
| FGFR3    | F1PK02 | 0.429 | 0.520 | 0.569 | 0.338 | 0.291 | 0.115 |
| FH       | E2RGR9 | 0.499 | 0.563 | 0.531 | 0.402 | 0.468 | 0.056 |
| FKBP10   | E2QZA8 | 0.746 | NaN   | NaN   | 1.000 | 0.492 | 0.254 |
| FLNA     | F1PWWO | 0.427 | 0.283 | 0.376 | 0.537 | 0.478 | 0.089 |
| FLRT2    | E2RB35 | 0.346 | 0.318 | 0.210 | 0.374 | 0.415 | 0.065 |
| FLRT3    | E2RKY7 | 0.451 | 0.445 | 0.360 | 0.459 | 0.456 | 0.028 |
| FLVCR1   | E2RSI2 | 0.305 | 0.352 | 0.368 | 0.258 | 0.175 | 0.072 |
| FN1      | F1P6H7 | 0.458 | 0.316 | 0.386 | 0.531 | 0.791 | 0.155 |
| folh1    | I4IY07 | 0.728 | 0.760 | 0.590 | 0.697 | 0.827 | 0.075 |
| FOLR2    | E2QXF0 | 0.683 | 0.701 | 0.687 | 0.646 | 0.679 | 0.016 |
| FRRS1    | E2RSW3 | 0.267 | NaN   | NaN   | 0.174 | 0.359 | 0.092 |
| FUCA1    | P48300 | 0.473 | 0.239 | 0.518 | 0.462 | 0.484 | 0.075 |
| FZD1     | F1PCN5 | 0.000 | 0.000 | NaN   | 0.000 | NaN   | 0.000 |
| FZD5     | E2QVP7 | 0.000 | NaN   | 0.000 | 0.000 | 0.000 | 0.000 |
| FZD6     | F1P9V1 | 0.150 | 0.130 | 0.169 | 0.037 | 0.229 | 0.057 |
| GARS     | F1Q332 | 0.615 | 0.729 | 0.616 | 0.550 | 0.613 | 0.045 |
| GLG1     | F6V9R9 | 0.537 | 0.522 | 0.474 | 0.555 | 0.552 | 0.028 |
| GLIPR1   | F1PE15 | 0.112 | 0.122 | 0.101 | 0.207 | 0.103 | 0.031 |
| GLS      | E2RJ93 | 0.589 | 0.538 | 0.641 | 0.436 | 0.647 | 0.078 |
| GM2A     | F1P8U3 | 0.587 | 0.332 | 0.389 | 1.000 | 0.786 | 0.266 |
| GNA13    | F1PZW8 | 0.365 | NaN   | NaN   | 0.731 | 0.000 | 0.365 |
| GNAI2    | P38400 | 0.461 | 0.461 | 0.515 | 0.418 | 0.460 | 0.025 |
| GNG12    | J9P702 | 0.460 | 0.459 | 0.577 | 0.440 | 0.461 | 0.035 |
| gns      | Q32KH4 | 0.549 | NaN   | 1.000 | 0.431 | 0.549 | 0.190 |
| GPC1     | F1PPA1 | 0.500 | NaN   | 0.753 | 0.415 | 0.500 | 0.113 |
| GPC4     | F1PM35 | 0.083 | 0.000 | 0.000 | 0.257 | 0.165 | 0.106 |
| GNMB     | E2QUR7 | 0.496 | 0.489 | 0.525 | 0.504 | 0.472 | 0.017 |
| GPR107   | F6USA6 | 0.223 | NaN   | NaN   | 0.000 | 0.445 | 0.223 |
| GPR89A   | E2R506 | 0.476 | 0.497 | 0.625 | 0.376 | 0.455 | 0.073 |
| GPRC5A   | F1PHN5 | 0.780 | NaN   | NaN   | 1.000 | 0.561 | 0.220 |
| GRN      | E2RHN1 | 0.561 | 0.465 | 0.624 | 0.609 | 0.513 | 0.064 |
| HAVCR1   | F1CME9 | 1.000 | 1.000 | 1.000 | 1.000 | 1.000 | 0.000 |
| HEXB     | K0J6C5 | 0.232 | NaN   | NaN   | 0.000 | 0.463 | 0.232 |
| HFE      | F1PX48 | 0.040 | 0.037 | 0.043 | 0.023 | 0.487 | 0.118 |
| HM13     | E2RB97 | 0.554 | 0.554 | 0.555 | NaN   | 0.337 | 0.073 |
| HMGCL    | E2RFD0 | 0.500 | 0.503 | 0.503 | 0.477 | 0.497 | 0.008 |
| HPN      | E2RKP5 | 0.369 | 0.379 | 0.268 | 0.359 | 0.637 | 0.098 |
| HSD17B4  | E2R4T7 | 0.493 | 0.528 | 0.604 | 0.446 | 0.458 | 0.057 |
| HSP90B1  | F1P8N6 | 0.550 | 0.466 | 0.563 | 0.569 | 0.538 | 0.032 |
| HSPG2    | J9NRJ0 | 0.309 | 0.120 | 0.147 | 0.503 | 0.471 | 0.177 |
| HTRA1    | F1PU95 | 0.193 | 0.402 | 0.160 | 0.000 | 0.227 | 0.117 |
| HYAL2    | E2R560 | 0.501 | 0.499 | 0.567 | 0.454 | 0.503 | 0.029 |
| HYOU1    | E2RB31 | 0.498 | 0.528 | 0.638 | 0.468 | 0.394 | 0.076 |
| ICAM1    | P33729 | 0.862 | 0.853 | 0.851 | 0.870 | 0.941 | 0.027 |
| IFI30    | F1PK63 | 0.539 | 0.768 | 0.608 | 0.469 | 0.390 | 0.129 |
| IFNGR1   | F6XBS0 | 0.000 | 0.000 | 0.000 | NaN   | 0.000 | 0.000 |
| IGF1R    | F1PXU6 | 0.315 | 0.334 | 0.307 | 0.323 | 0.303 | 0.012 |
| IGFBP7   | E2RNL2 | 0.000 | 0.000 | 0.000 | 0.000 | NaN   | 0.000 |
| IGSF11   | F1PJL3 | 0.561 | NaN   | 0.420 | NaN   | 0.702 | 0.141 |



|          |        |       |       |       |       |       |       |
|----------|--------|-------|-------|-------|-------|-------|-------|
| IGSF3    | F1P9K1 | 0.458 | 0.465 | 0.459 | 0.458 | 0.410 | 0.014 |
| IGSF5    | E2RBD3 | 1.000 | 1.000 | 1.000 | 1.000 | 1.000 | 0.000 |
| IGSF8    | J9NWL5 | 0.409 | NaN   | 0.000 | 0.468 | 0.409 | 0.156 |
| IGSF9    | F1PHY9 | 0.325 | 0.347 | 0.333 | 0.316 | 0.293 | 0.018 |
| IL1R1    | F1PSF0 | 0.815 | NaN   | 1.000 | 0.815 | 0.779 | 0.074 |
| IL1RAP   | J9NU59 | 0.560 | 0.507 | 0.590 | 0.529 | 0.603 | 0.039 |
| IL6ST    | F1PTB2 | 0.702 | 0.489 | NaN   | 0.702 | 0.950 | 0.154 |
| ITGA1    | F1PP33 | 0.330 | 0.365 | 0.325 | 0.307 | 0.336 | 0.017 |
| ITGA2    | E2REA9 | 0.532 | 0.605 | 0.570 | 0.485 | 0.495 | 0.049 |
| ITGA3    | F1Q439 | 0.250 | 0.283 | 0.240 | 0.230 | 0.259 | 0.018 |
| ITGA6    | E2RL88 | 0.287 | 0.311 | 0.287 | 0.287 | 0.272 | 0.010 |
| ITGAV    | F1P8Q0 | 0.429 | 0.460 | 0.446 | 0.412 | 0.401 | 0.023 |
| ITGB1    | E2RT60 | 0.346 | 0.382 | 0.352 | 0.319 | 0.341 | 0.018 |
| ITGB5    | J9P3C1 | 0.545 | NaN   | 0.623 | 0.486 | 0.545 | 0.045 |
| ITGB6    | E2RBL9 | 0.381 | 0.390 | 0.387 | 0.362 | 0.375 | 0.010 |
| ITGB8    | F6K717 | 0.447 | 0.000 | 0.278 | 0.615 | 0.653 | 0.248 |
| ITPR3    | E2RMC0 | 0.473 | 0.372 | 0.445 | 0.525 | 0.502 | 0.053 |
| KIAA1161 | J9PAS5 | 0.076 | 0.087 | 0.000 | 0.076 | NaN   | 0.029 |
| KIRREL   | F1Q051 | 0.026 | 0.000 | 0.000 | 0.052 | 0.128 | 0.045 |
| KTN1     | E2RG27 | 0.464 | 0.437 | 0.498 | 0.447 | 0.481 | 0.024 |
| L1CAM    | E2R2V6 | 0.578 | 0.635 | 0.622 | 0.522 | 0.533 | 0.050 |
| LAMA3    | E2RPP1 | 0.396 | 0.705 | 0.395 | 0.388 | 0.398 | 0.080 |
| LAMB1    | F1PCD8 | 0.422 | 0.456 | 0.238 | 0.447 | 0.397 | 0.067 |
| LAMB3    | F1PFM5 | 0.406 | 0.387 | 0.339 | 0.425 | 0.453 | 0.038 |
| LAMC1    | F1PHK9 | 0.296 | 0.071 | 0.085 | 0.506 | 0.549 | 0.225 |
| LAMP1    | F1Q260 | 0.474 | 0.513 | 0.597 | 0.409 | 0.435 | 0.067 |
| LAMP2    | E2RNJ1 | 0.090 | 1.000 | 0.000 | 0.000 | 0.181 | 0.295 |
| LDLR     | F1PML2 | 0.361 | NaN   | 0.361 | 0.475 | 0.204 | 0.091 |
| LGALS3BP | E2RKQ6 | 0.539 | 0.562 | 0.594 | 0.516 | 0.499 | 0.035 |
| LGMN     | E2QXF2 | 0.485 | 0.481 | 0.310 | 0.489 | 0.567 | 0.066 |
| LHFPL2   | J9P9A6 | 0.516 | 0.524 | 0.533 | 0.394 | 0.507 | 0.039 |
| LIPH     | F1PG57 | 0.231 | 0.168 | 0.253 | 0.210 | 0.324 | 0.050 |
| LMAN2    | P49256 | 0.543 | 0.549 | 0.536 | 0.559 | 0.380 | 0.048 |
| LMF2     | J9NVV3 | 0.518 | 0.533 | 0.549 | 0.475 | 0.503 | 0.026 |
| LRP1     | J9P315 | 0.239 | 0.197 | 0.161 | 0.281 | 0.299 | 0.056 |
| LRPAP1   | F1PAG7 | 0.852 | NaN   | NaN   | 1.000 | 0.705 | 0.148 |
| LSAMP    | F1PJN2 | 0.725 | 0.751 | 0.734 | 0.716 | 0.709 | 0.015 |
| LSR      | F1PKT2 | 0.130 | 0.115 | 0.096 | 0.148 | 0.145 | 0.020 |
| LTBR     | E2RG08 | 0.010 | 0.000 | 0.007 | 0.013 | 0.098 | 0.026 |
| M6PR     | E2R4C1 | 0.201 | 0.209 | 0.154 | 0.193 | 0.228 | 0.022 |
| MAGT1    | E2RRH2 | 0.546 | 0.526 | 0.566 | 0.196 | 0.576 | 0.105 |
| MET      | Q75ZY9 | 0.406 | 0.403 | 0.360 | 0.416 | 0.409 | 0.015 |
| METTL7A  | J9NTA1 | 0.454 | 0.446 | 0.449 | 0.498 | 0.460 | 0.016 |
| MFGE8    | F1PFZ5 | 0.731 | 0.710 | 0.673 | 0.778 | 0.752 | 0.037 |
| MFSD6    | E2RK97 | 0.044 | 0.000 | 0.000 | 0.307 | 0.087 | 0.099 |
| MLEC     | E2RD92 | 0.457 | 0.479 | 0.611 | 0.412 | 0.436 | 0.060 |
| MME      | F5C3N2 | 1.000 | NaN   | NaN   | 1.000 | 1.000 | 0.000 |
| MMP14    | F1PXM2 | 0.264 | 0.324 | 0.096 | 0.305 | 0.224 | 0.077 |
| MMP15    | F1P625 | 0.116 | 0.034 | 0.065 | 0.167 | 0.269 | 0.085 |
| MPZL1    | J9NSZ7 | 0.124 | NaN   | 0.000 | 0.124 | 0.160 | 0.053 |
| MRPL21   | J9P2W1 | 0.000 | 0.000 | 0.000 | NaN   | 0.437 | 0.146 |
| MRPS35   | E2R2D2 | 0.309 | 0.518 | 0.000 | 0.281 | 0.338 | 0.143 |
| MSLN     | J9NX38 | 0.834 | 0.977 | 0.881 | 0.654 | 0.787 | 0.104 |
| MUC1     | J9P6J1 | 0.901 | 0.894 | 0.880 | 0.907 | 0.931 | 0.016 |
| MUC20    | F1PJ84 | 0.929 | 0.840 | 0.858 | 1.000 | 1.000 | 0.076 |
| NCLN     | E2QY93 | 0.413 | 0.513 | 0.604 | 0.313 | 0.000 | 0.201 |
| NCSTN    | M1VEJ1 | 0.267 | 0.249 | 0.000 | 0.285 | 0.394 | 0.107 |
| NDUFA10  | E2RIG0 | 0.489 | 0.500 | 0.418 | 0.477 | 0.598 | 0.051 |
| NEO1     | J9P2T1 | 0.335 | 0.101 | 0.333 | 0.338 | 0.433 | 0.084 |
| NNT      | F1PLG2 | 0.467 | 0.547 | 0.491 | 0.295 | 0.443 | 0.075 |
| NOTCH2   | F1PPP5 | 0.226 | 0.000 | 0.214 | 0.298 | 0.238 | 0.081 |
| NPC1L1   | A0MJAA | 0.929 | 0.934 | 0.931 | 0.927 | 0.923 | 0.004 |
| NPC2     | Q28895 | 0.375 | 0.375 | 0.310 | NaN   | 0.679 | 0.123 |
| NPDC1    | F6XGX1 | 0.000 | NaN   | 0.000 | NaN   | 0.000 | 0.000 |
| NPTN     | F1PDQ0 | 0.040 | 0.037 | 0.022 | 0.069 | 0.044 | 0.014 |
| NTN4     | E2QZY0 | 0.180 | 0.000 | NaN   | 0.359 | NaN   | 0.180 |

|          |        |       |       |       |       |       |       |
|----------|--------|-------|-------|-------|-------|-------|-------|
| NUP155   | F6XTD9 | 0.411 | 0.256 | 0.437 | 0.384 | 0.460 | 0.064 |
| NUP210   | F1PSK9 | 0.507 | 0.490 | 0.636 | 0.507 | NaN   | 0.049 |
| OCLN     | E2R3X4 | 0.156 | 0.000 | 0.152 | 0.160 | 0.169 | 0.044 |
| OSMR     | E2QWS7 | 0.631 | 0.593 | 0.628 | 0.634 | 0.908 | 0.080 |
| P4HA1    | E2RLB8 | 0.591 | 0.606 | 0.646 | 0.575 | 0.504 | 0.043 |
| P4HA2    | F1PTP6 | 0.552 | 0.649 | NaN   | NaN   | 0.455 | 0.097 |
| PCCB     | F1PTU4 | 0.482 | 0.533 | 0.508 | 0.406 | 0.457 | 0.045 |
| PCDH1    | E2QX93 | 0.219 | 0.191 | 0.151 | 0.247 | 0.248 | 0.038 |
| PCYOX1   | E2R1N7 | 0.388 | 0.243 | 1.000 | 0.534 | 0.203 | 0.272 |
| PGAP1    | E2R8V9 | 0.493 | 0.502 | NaN   | 0.493 | 0.488 | 0.005 |
| PIGN     | F1PVD7 | 0.689 | 1.000 | NaN   | NaN   | 0.379 | 0.311 |
| PIGO     | E2RKS8 | 0.494 | 0.557 | 0.516 | 0.473 | 0.436 | 0.041 |
| PIGR     | F6Y6T8 | 0.411 | 0.369 | 0.316 | 0.452 | 0.496 | 0.066 |
| PLAUR    | E2RGN0 | 0.804 | 0.795 | 0.666 | 0.814 | 0.831 | 0.046 |
| PLD3     | E2QVP0 | 0.350 | NaN   | 0.561 | 0.350 | 0.339 | 0.074 |
| PLOD2    | F1PZL5 | 0.448 | 0.407 | 0.337 | 0.857 | 0.489 | 0.150 |
| PLOD3    | E2RTL4 | 0.389 | NaN   | 0.000 | 0.389 | 1.000 | 0.333 |
| PLXNA1   | F1P6G0 | 0.216 | 0.141 | 0.178 | 0.255 | 0.392 | 0.082 |
| PLXNA2   | F1PHZ1 | 0.421 | 0.441 | 0.447 | 0.400 | 0.327 | 0.040 |
| PLXNB1   | E2RM56 | 0.213 | 0.215 | 0.215 | 0.209 | 0.212 | 0.003 |
| PLXNB2   | F1P9S5 | 0.307 | 0.320 | 0.309 | 0.292 | 0.304 | 0.008 |
| PLXNB3   | F1PXM6 | 0.000 | 0.000 | 0.209 | NaN   | 0.000 | 0.070 |
| PMPCA    | F1PF09 | 0.488 | 0.513 | 0.463 | 0.407 | 0.632 | 0.069 |
| PNPLA6   | E2RIR2 | 0.497 | 0.379 | 0.504 | 0.497 | NaN   | 0.042 |
| PODXL    | F1PID4 | 0.928 | 0.917 | 0.918 | 0.937 | 0.950 | 0.013 |
| PON2     | F1PSG5 | 0.483 | 0.403 | 0.513 | 0.454 | 0.512 | 0.042 |
| PPIB     | F1PLV2 | 0.703 | 0.555 | 0.754 | 0.741 | 0.666 | 0.069 |
| PRCP     | F1PWK3 | 0.264 | 0.000 | NaN   | NaN   | 0.528 | 0.264 |
| PRKCSH   | E2RKK6 | 0.795 | 0.590 | 1.000 | 1.000 | 0.579 | 0.208 |
| PrP      | O46593 | 0.697 | 0.698 | 0.707 | 0.656 | 0.697 | 0.013 |
| PTGER2   | F1P776 | 0.000 | 0.000 | 0.000 | NaN   | NaN   | 0.000 |
| PTGFRN   | F1PR26 | 0.346 | 0.379 | 0.370 | 0.322 | 0.322 | 0.026 |
| PTK7     | E2RMT2 | 0.433 | 0.462 | 0.423 | 0.395 | 0.443 | 0.022 |
| PTPRA    | E2R5J7 | 0.000 | NaN   | 0.000 | NaN   | 0.000 | 0.000 |
| PTPRD    | F1PH17 | 0.492 | 0.441 | 0.413 | 0.564 | 0.542 | 0.063 |
| PTPRF    | E2RE80 | 0.364 | 0.337 | 0.334 | 0.402 | 0.391 | 0.030 |
| PTPRG    | F1PWC1 | 0.272 | 0.184 | 0.259 | 0.288 | 0.285 | 0.033 |
| PTPRJ    | F1P983 | 0.941 | 0.971 | 0.867 | 0.931 | 0.951 | 0.031 |
| PTPRM    | F1PUP2 | 0.422 | 0.421 | 0.431 | 0.403 | 0.423 | 0.008 |
| PTPRO    | F1PWH3 | 1.000 | 0.744 | 1.000 | 1.000 | 1.000 | 0.064 |
| PTPRS    | E2R6Z2 | 0.154 | 0.078 | 0.065 | 0.230 | 0.310 | 0.099 |
| PVR      | F1PVS7 | 0.362 | 0.390 | 0.384 | 0.340 | 0.309 | 0.031 |
| RAB10    | F224P9 | 0.464 | 0.553 | 0.489 | 0.410 | 0.440 | 0.048 |
| RAB13    | F1PTE3 | 0.459 | 0.476 | 0.000 | 0.493 | 0.443 | 0.131 |
| RAB25    | E2RQ15 | 0.500 | 0.533 | 0.581 | 0.466 | 0.437 | 0.053 |
| RAB5A    | P18066 | 0.456 | 0.404 | 0.499 | 0.443 | 0.468 | 0.030 |
| RAB5C    | P51147 | 0.470 | 0.375 | 0.467 | 0.541 | 0.473 | 0.043 |
| RAB8A    | P61007 | 0.460 | 0.502 | 0.512 | 0.407 | 0.418 | 0.047 |
| RAB9A    | P24408 | 0.525 | NaN   | 0.381 | 0.598 | 0.525 | 0.072 |
| RAC1     | P62999 | 0.482 | 0.474 | 0.490 | 0.389 | 0.536 | 0.041 |
| RDH14    | J9NWS8 | 0.485 | 0.381 | 0.511 | 0.459 | 0.594 | 0.066 |
| RELL1    | E2QUZ0 | 0.129 | 0.149 | 0.113 | 0.027 | 0.146 | 0.039 |
| RPN1     | E2RQ08 | 0.515 | 0.538 | 0.563 | 0.478 | 0.493 | 0.033 |
| RPSA     | J9JHJ2 | 0.421 | 0.422 | 0.420 | 0.412 | 0.520 | 0.027 |
| RTN4     | E2R925 | 0.582 | 0.565 | 0.599 | 0.624 | 0.553 | 0.026 |
| SCARB1   | F1PQT1 | 1.000 | 1.000 | 1.000 | NaN   | NaN   | 0.000 |
| SCPEP1   | J9NRZ7 | 0.536 | 0.618 | 0.453 | 1.000 | 0.096 | 0.267 |
| SDC4     | J9NZ79 | 0.082 | 0.044 | 0.041 | 0.126 | 0.121 | 0.040 |
| SDHB     | Q0QEY4 | 0.492 | 0.543 | 0.682 | 0.362 | 0.441 | 0.106 |
| SEC61A1  | J9NXA9 | 0.487 | 0.581 | 0.492 | 0.479 | 0.482 | 0.028 |
| SEMA4B   | F1P9X6 | 0.311 | 0.203 | 0.230 | 0.411 | 0.392 | 0.092 |
| SEMA4C   | E2RHV1 | 0.356 | 0.271 | 0.195 | 0.440 | 0.453 | 0.107 |
| SEMA4D   | F1PSB1 | 0.381 | 0.315 | 0.299 | 0.447 | 0.485 | 0.079 |
| SEMA4G   | E2RP18 | 0.104 | 0.000 | 0.038 | 0.199 | 0.170 | 0.083 |
| SERPINH1 | E2RHY7 | 0.497 | 0.481 | 0.544 | 0.485 | 0.508 | 0.022 |
| SFTPD    | E2QWRO | 0.683 | NaN   | 0.000 | 0.683 | 1.000 | 0.333 |

|           |        |       |       |       |       |       |       |
|-----------|--------|-------|-------|-------|-------|-------|-------|
| SIAE      | F1PXN3 | 0.531 | 0.454 | 0.609 | NaN   | NaN   | 0.077 |
| SIGIRR    | F1PY07 | 0.083 | 0.000 | 0.000 | 0.166 | 0.172 | 0.085 |
| SLC12A2   | F1P9W5 | 0.167 | 0.107 | 0.130 | 0.203 | 0.281 | 0.062 |
| SLC12A6   | F1Q2J3 | 0.120 | 0.127 | 0.416 | 0.000 | 0.113 | 0.107 |
| SLC12A7   | F1PKH1 | 0.220 | 0.000 | 0.354 | 0.220 | NaN   | 0.118 |
| SLC15A4   | F1PWH8 | 0.463 | 0.619 | NaN   | 0.463 | 0.444 | 0.058 |
| SLC16A1   | F1PCQ3 | 0.195 | 0.218 | 0.173 | 0.180 | 0.209 | 0.018 |
| SLC16A3   | J9NVM8 | 0.363 | 0.405 | 0.456 | 0.249 | 0.322 | 0.072 |
| SLC1A4    | F1Q0H9 | 0.000 | 0.000 | 0.000 | 0.000 | 0.000 | 0.000 |
| SLC1A5    | K7ZSN9 | 0.053 | 0.000 | 0.059 | 0.047 | 0.307 | 0.080 |
| SLC22A2   | F1Q431 | 0.344 | 0.426 | NaN   | 0.261 | NaN   | 0.082 |
| SLC27A4   | F1PAM6 | 0.515 | 0.514 | 0.516 | 0.471 | 1.000 | 0.132 |
| SLC2A1    | F1PWN2 | 0.468 | 0.506 | 0.553 | 0.346 | 0.430 | 0.071 |
| SLC31A1   | J9P9D2 | 0.302 | 0.000 | 0.405 | 0.308 | 0.295 | 0.104 |
| SLC33A1   | E2RTD2 | 0.380 | 0.356 | 0.583 | 0.404 | 0.335 | 0.074 |
| SLC35F6   | J9P2U5 | 0.537 | 0.536 | 0.538 | 0.639 | 0.444 | 0.049 |
| SLC37A4   | F1PPG9 | 0.527 | 0.588 | 0.427 | 0.544 | 0.509 | 0.049 |
| SLC39A4   | F1PC23 | 0.908 | 0.854 | 0.901 | 0.929 | 0.914 | 0.022 |
| SLC39A6   | E2RMA6 | 0.139 | 0.177 | 0.015 | 0.285 | 0.101 | 0.086 |
| SLC39A7   | Q5TJF6 | 0.435 | 0.501 | 0.000 | 0.435 | NaN   | 0.167 |
| SLC3A2    | F1PRC5 | 0.202 | 0.233 | 0.219 | 0.185 | 0.171 | 0.024 |
| SLC44A1   | E2R949 | 0.133 | 0.134 | 0.099 | 0.131 | 0.139 | 0.011 |
| SLC44A2   | J9P0D9 | 0.264 | 0.281 | 0.219 | 0.246 | 0.352 | 0.042 |
| SLC44A4   | F1P9U5 | 0.947 | 0.880 | 0.954 | 0.950 | 0.944 | 0.020 |
| SLC4A7    | J9PAF7 | 0.063 | 0.060 | 0.082 | 0.042 | 0.066 | 0.012 |
| SLC52A3   | E2RM06 | 1.000 | NaN   | 1.000 | 1.000 | 1.000 | 0.000 |
| SLC5A6    | E2R9T1 | 0.763 | 0.911 | 0.726 | 0.801 | 0.689 | 0.074 |
| SLC6A6    | Q00589 | 0.226 | 0.296 | 0.000 | 0.175 | 0.276 | 0.099 |
| SLC7A5    | F1PH98 | 0.183 | 0.264 | 0.172 | 0.186 | 0.180 | 0.025 |
| SLC9A1    | F1PID1 | 0.079 | 0.121 | 0.066 | 0.054 | 0.091 | 0.023 |
| SLIT3     | F1Q3G2 | 0.381 | 0.197 | 0.128 | 0.564 | 0.567 | 0.202 |
| SLITRK4   | F1Q4K7 | 0.417 | 0.390 | 0.439 | 0.402 | 0.431 | 0.020 |
| SPINT1    | F1PQ47 | 0.354 | 0.334 | 0.328 | 0.384 | 0.374 | 0.024 |
| SPINT2    | F1P984 | 0.225 | 0.173 | 0.201 | 0.249 | 0.251 | 0.032 |
| SSR1      | P16967 | 0.512 | 0.478 | 0.546 | 0.139 | 0.713 | 0.160 |
| SSR4      | E2QY54 | 0.544 | 0.589 | 0.635 | 0.452 | 0.500 | 0.068 |
| ST14      | F1PF63 | 0.206 | 0.187 | 0.173 | 0.225 | 0.311 | 0.044 |
| STEAP3    | F1P8R0 | 0.288 | 0.240 | 0.277 | 0.298 | 0.416 | 0.049 |
| STT3A     | F1PJP5 | 0.508 | 0.510 | 0.548 | 0.480 | 0.507 | 0.017 |
| STT3B     | E2RG47 | 0.476 | 0.548 | 0.541 | 0.299 | 0.412 | 0.094 |
| SUCLG1    | E2R0Y5 | 0.444 | 0.418 | 0.544 | 0.313 | 0.469 | 0.071 |
| SUOX      | F1PVD4 | 0.500 | 0.275 | 0.441 | 1.000 | 0.560 | 0.211 |
| SYNGR2    | F1PZ37 | 1.000 | 1.000 | 1.000 | NaN   | 0.000 | 0.333 |
| SYPL1     | E2RC10 | 0.324 | 0.327 | 0.337 | 0.242 | 0.320 | 0.025 |
| TAPBP     | Q5TJE4 | 0.535 | 0.598 | 0.594 | 0.477 | 0.472 | 0.061 |
| TBL2      | E2RP67 | 0.478 | 0.532 | 0.566 | 0.346 | 0.424 | 0.082 |
| TENM4     | F1PFD6 | 0.502 | 0.655 | 0.543 | 0.461 | 0.439 | 0.074 |
| TEX264    | E2RAC8 | 0.464 | NaN   | 0.552 | NaN   | 0.376 | 0.088 |
| TF        | F6V1W9 | 0.438 | 0.437 | 0.506 | 0.438 | 0.437 | 0.018 |
| TGFBR3    | F1PIG0 | 0.310 | 0.310 | 0.311 | 0.299 | 0.352 | 0.014 |
| TIMM21    | E2R117 | 0.496 | NaN   | 0.627 | 0.000 | 0.496 | 0.209 |
| TINAGL1   | E2QXH3 | 0.249 | 0.000 | 0.187 | 0.330 | 0.310 | 0.113 |
| TM2D3     | F6UUM9 | 0.234 | 0.606 | NaN   | 0.234 | 0.177 | 0.143 |
| TM7SF2    | E2RS95 | 0.512 | 0.565 | 0.575 | 0.444 | 0.460 | 0.059 |
| TM9SF2    | E2RSZ5 | 0.416 | 0.513 | 0.427 | 0.232 | 0.404 | 0.076 |
| TM9SF3    | E2RSD0 | 0.441 | 0.571 | 0.474 | 0.290 | 0.407 | 0.087 |
| TMED10    | E2QYL0 | 0.537 | 0.581 | 0.698 | 0.493 | 0.464 | 0.080 |
| TMED9     | F6XD36 | 0.495 | 0.609 | 0.529 | 0.458 | 0.461 | 0.055 |
| TMEM109   | J9P616 | 0.605 | 0.547 | 0.662 | 0.793 | 0.471 | 0.109 |
| TMEM2     | F1PH14 | 0.353 | 0.323 | 0.329 | 0.399 | 0.378 | 0.031 |
| TMEM30A   | E2R2Z8 | 0.349 | 0.437 | 0.418 | 0.067 | 0.280 | 0.127 |
| TMPRSS11E | F1Q3A2 | 0.297 | 0.319 | 0.303 | 0.270 | 0.290 | 0.015 |
| TMX1      | E2RK67 | 0.533 | 0.590 | 0.560 | 0.434 | 0.506 | 0.052 |
| TMX3      | F1PIX5 | 0.516 | 0.432 | NaN   | 0.516 | 0.681 | 0.083 |
| TPBG      | E2QXI6 | 0.293 | 0.230 | 0.287 | 0.336 | 0.298 | 0.029 |
| TRPA1     | F1Q2M0 | 0.000 | 0.000 | 0.414 | 0.000 | 0.000 | 0.104 |

|         |        |       |       |       |       |       |       |
|---------|--------|-------|-------|-------|-------|-------|-------|
| TSPAN1  | J9NS67 | 0.645 | 0.537 | NaN   | 0.645 | 1.000 | 0.154 |
| TSPAN14 | E2QZH1 | 0.228 | 0.113 | 0.214 | 0.251 | 0.241 | 0.042 |
| TSPAN15 | E2RS68 | 0.128 | 0.054 | 0.127 | 0.129 | 0.167 | 0.029 |
| TSPAN33 | F1PEJ5 | 0.034 | 0.000 | 0.000 | 0.067 | 0.149 | 0.054 |
| TSPAN6  | F1PMP0 | 0.000 | 0.000 | 0.000 | 0.000 | NaN   | 0.000 |
| TSPAN8  | E2QSC8 | 0.220 | 0.236 | 0.240 | 0.190 | 0.204 | 0.020 |
| TTYH3   | F1P9A7 | 0.317 | 0.335 | 0.134 | 0.302 | 0.332 | 0.058 |
| UNC93B1 | F1PKK2 | 0.414 | 0.549 | 0.000 | 0.348 | 0.480 | 0.170 |
| UPK3B   | E2R4D0 | 0.838 | 0.830 | 0.861 | 0.846 | 0.829 | 0.012 |
| VASN    | E2RRN8 | 0.121 | 0.051 | 0.077 | 0.165 | 0.165 | 0.051 |
| VASP    | P50551 | 0.524 | 0.452 | 0.524 | 0.524 | 0.548 | 0.024 |
| VCAN    | J9P884 | 0.197 | 0.053 | 0.138 | 0.255 | 0.279 | 0.086 |
| VDAC2   | E2R948 | 0.476 | 0.576 | 0.541 | 0.344 | 0.412 | 0.091 |
| VLDLR   | F1P787 | 0.100 | 0.119 | 0.082 | 0.039 | 0.300 | 0.074 |
| VNN1    | Q9TSX8 | 0.750 | 0.736 | 0.780 | 0.738 | 0.762 | 0.017 |
| VSIG10  | J9P1R7 | 0.176 | 0.241 | 0.000 | 1.000 | 0.111 | 0.282 |
| WFDC2   | F1PDT8 | 0.486 | 0.566 | 0.486 | 0.358 | NaN   | 0.069 |
