# Supplementary material for: Apicobasal Surfaceome Architecture Encodes for Polarized Epithelial Functionality and Depends on Tumor Suppressor PTEN
Source: Int J Mol Sci. 2022 Dec 19;23(24):16193. doi: 10.3390/ijms232416193 (PMC9788433; doi:10.3390/ijms232416193)
Supplement: Supplementary file 1 [file ijms-23-16193-s001.zip › Table S2_MS protein identification and quantification data.xlsx]

## Sheet: 2.-3. APBL distribution
Gene name	Uniprot ID	AP Median	AP fw1	AP fw2	AP rv1	AP rv2	MAD
ABCB6	F1PRH1	0.465466	0.376755	0.462039	0.468893	0.495329	0.0313569
ABCC3	J9NY13	0.251502	0.110004	0.243114	0.261162	0.259889	0.0419835
ACAT1	F1PC58	0.567793	0.562502	0.581732	0.505092	0.573084	0.0218055
ACE2	J9P7Y2	0.907811	0.901024	0.889149	0.914598	0.94029	0.0161785
ACSF2	F1PTR3	0.469856	0.52097	0.477141	0.435644	0.46257	0.0249743
ADAM10	F1PGR0	0.244296	0.245813	0.236367	0.242779	0.255002	0.0054172
ADAM17	F1PFZ9	0.29066	0.360614	0.293859	0.280718	0.287461	0.0215735
ADAM28	F1PRX8	0.36254	0	0.346139	0.378941	0.430109	0.115728
ADAM9	J9P4T2	0.389199	0.408674	0.41687	0.35207	0.369725	0.0259373
AGPAT1	E2RCA0	0.496527	0.518641	0.495195	0.467231	0.49786	0.0135186
AGRN	F1Q2Z6	0.257024	0.203571	0.178184	0.310477	0.381609	0.0775827
ANO6	J9NZU1	0.19315	0.112241	0.17427	0.236108	0.21203	0.0404066
ANXA2	Q6TEQ7	0.535411	0.574877	0.576916	0.44618	0.495946	0.0524168
APMAP	E2RPE9	0.634772	0.47838	0.579753	0.694276	0.689792	0.0814837
ASAH1	F1PWA9	0.557343	0.416326	0.557343	NaN	0.663564	0.0824124
ATP13A1	F1PRS5	0.432194	0.559536	0	NaN	0.432194	0.186512
ATP1A1	J9NZA9	0.169169	0.171892	0.167033	0.171306	0.166464	0.00242557
ATP1A2	F1PL53	0	0	0	0.19486	NaN	0.0649535
ATP1B1	P06583	0.136054	0.147961	0.111946	0.124147	0.150361	0.015557
ATP1B3	F1Q0S2	0.146337	0.136175	0.156498	0.109735	0.216407	0.0317488
ATP2B4	F1PHQ7	0.374572	0.524328	0.427149	0.231138	0.321994	0.0995862
B2M	E2RN10	0.221016	0.233781	0.259384	0.208251	0.204968	0.0199866
BCAM	J9P3V6	0.212562	0.213376	0.20374	0.211749	0.219001	0.0042219
BCHE	F1PEN8	0.375803	0.548104	NaN	NaN	0.203502	0.172301
BMPR1A	E2QW66	0	NaN	NaN	0	0	0
BMPR2	F1PCC1	0	NaN	NaN	0	0	0
BSG	E2QZT4	0.129917	0.169685	0.144162	0.0920748	0.115672	0.0265252
BST1	E2RJT2	0.908295	0.904109	0.897788	0.912482	0.957979	0.0171409
BST2	J9NVI2	0.651697	0.710702	0.689006	0.545181	0.614388	0.0600346
CA12	F1Q440	0.242689	0.21965	0.140699	0.265729	0.337651	0.0607579
CA14	F1P7K9	0.369063	0.383417	0.369474	0.368652	0.256031	0.032052
CADM1	F1P6Z9	0.20278	0.201782	0.203779	0.188679	0.234444	0.0119406
CALU	E2RN38	0.894143	0.47429	1	1	0.788285	0.184356
CANX	P24643	0.534831	0.543204	0.64503	0.526457	0.513324	0.0371133
CAV1	P33724	0.53811	0.599809	0.564024	0.489503	0.512196	0.0405335
CAV2	O46550	0.529235	0.509669	0.513279	0.56342	0.545191	0.0214159
CD109	F1PM26	0.585899	0.451031	0.392502	0.756669	0.720768	0.158476
CD14 (607076)	A0A1S7J0A8	1	NaN	NaN	1	1	0
CD151	J9P4E7	0.244452	0.310506	0.252493	0.236411	0.230927	0.0239153
CD276	F1PDP5	0.212715	0.212425	0.240636	0.213005	0.210003	0.0078031
CD302	F1PGD5	0.499181	0.501837	0.488229	0.496524	0.529897	0.0117451
CD40	G1K297	0.255611	0.315579	0.311804	0.17893	0.199418	0.0622589
CD44	J9P423	0.217061	0.213294	0.214309	0.219812	0.264558	0.0141918
CD47	J9P735	0.580649	0.544979	0.595607	0.565691	1	0.121234
CD55	F1PCI2	0.124521	NaN	NaN	0.249043	0	0.124521
CD58	F1PBA0	0.0974826	0.046679	0.0744641	0.120501	0.135406	0.0336909
CD59	J9P4N4	0.73225	0.73822	0.772722	0.696843	0.726279	0.0219549
CD63	F1PIT4	0.506555	0.699392	0.717833	0.313718	0.249579	0.213482
CD74	E2RF90	0.333781	0.25701	0.327517	0.340045	0.344703	0.025055
CD81	F1PB66	0.0273122	0	0	0.0546244	0.106499	0.0402809
CD82	J9P9V8	0.352955	0	0.4841	0.292922	0.412989	0.151042
CD9	F1PQM7	0.34176	0.39976	0.36153	0.297833	0.321989	0.035367
CD99	J9PA14	0.258198	0.253246	0.263151	0.26679	0.249579	0.0067791
CDC42	P60952	0.456105	0.180043	0.265493	0.762909	0.646716	0.241022
CDCP1	F1PV63	0.356934	0.332891	0.306728	0.380977	0.425965	0.0418308
CDH1	F1PAA4	0.195923	0.194638	0.170534	0.21914	0.197208	0.0127941
CDH10	E2R858	0.231383	0	0.22426	0.238507	0.319377	0.083406
CDH16	E2REV2	0.17642	0.200519	0.17554	0.166846	0.1773	0.00885827
CDH17	J9NTL4	0.520924	0.468892	0.456661	0.572956	0.57555	0.0557384
CDH3	F1PAA3	0.0982673	0	0	0.196535	0.354699	0.137809
CDH6	E2R0Z0	0.418092	0.412512	0.401591	0.427675	0.423672	0.00931083
CEACAM1	Q004B2	0.95599	0.903737	0.964713	0.987591	0.947267	0.025325
CELSR1	F1PLY1	0.452673	0.548274	0.449606	0.45574	0.414983	0.0348561
CELSR2	E2R4F0	0.329108	0.350318	0.331051	0.286089	0.327165	0.0170284
CENPV	F1PH09	0.518849	0.382307	0.425328	0.62885	0.61237	0.108396
CEPT1	E2QV13	1	1	NaN	0.459068	1	0.180311
CLDN1	J9P0K9	0.423986	0.458403	0.460331	0	0.38957	0.132291
CLDN2	Q95KM6	0.399748	0.482787	0.446257	0.301023	0.35324	0.0686949
CLDN3	Q95KM5	0.371249	0.428711	0.455749	0.285664	0.313786	0.0712524
CLDN4	E2RNC2	0.216685	0.183866	0.294342	0.249505	0.0414509	0.0796326
CLDN7	E2R5S3	0.101219	0.202438	0	NaN	NaN	0.101219
CLDND1	F1PYH4	0.0627269	0.125454	0	NaN	NaN	0.0627269
CLEC7A	E2RFU8	0.38452	0.378689	0.390351	0.34	0.398598	0.0175648
CLU	P25473	0.639326	0.640021	0.600049	0.65376	0.638632	0.0137748
CNNM3	E2RGW9	0	0	0	NaN	0	0
CNNM4	F1PJ05	0.142842	0.189311	0.140196	0.117671	0.145488	0.0192333
COL18A1	F6Y3U7	0.175689	0.104821	0.0835363	0.344061	0.246557	0.100565
COL4A1	Q28271	0.423777	0.266365	0.237303	0.618446	0.58119	0.173992
COL4A2	F1Q129	0.366137	0.172371	0.0767081	0.7184	0.559904	0.257306
CP	F1PAX2	0.839457	0.823956	0.842127	0.836786	0.851293	0.00816932
CPM	F1PGL5	0.634477	0.661276	0.669401	0.565546	0.607678	0.0393635
CRELD1	F1PD72	0.612953	0.630143	0.595763	0.732217	0.535029	0.0578921
CRIM1	E2R003	0	0	0	0	0.285028	0.0712569
CS	F1PV92	0.487292	0.550802	0.538981	0.401698	0.435602	0.0631206
CTNNB1	B6V8E6	0.453185	0.514616	0.316802	0.490313	0.416056	0.0680176
CTSA	F1P9I9	0.503895	0.36209	0.427995	0.579796	0.581651	0.0928405
CTSB	E2R6Q7	0.464125	0.505659	0.356587	0.425875	0.502376	0.0563935
CTSD	Q4LAL9	0.457929	0.479295	0.498696	0.377753	0.436563	0.0409187
CTSH	F6X9C1	0.186831	NaN	0	NaN	0.373662	0.186831
CTSS	Q8HY81	0.48931	NaN	0	0.48931	0.556185	0.185395
CTSZ	F1PIF2	0.433155	0	0.529513	0.407091	0.459218	0.14541
CXADR	F1P992	0.295568	0.325079	0.288947	0.26573	0.302189	0.0181478
CYB5R1	E2RF18	0.530084	0.662511	0.564547	0.416464	0.49562	0.0787436
CYP20A1	F1PLQ3	0.495357	0.49268	0.48953	0.498035	0.545087	0.015228
DAG1	Q9TSZ6	0.375386	0.339674	0.325078	0.502765	0.411096	0.0622774
DAO	E2QV61	0.580191	0.53895	0.695833	0.617914	0.542467	0.0580825
DCBLD2	F1PVX2	0.451356	0.443484	0.436271	0.471862	0.459228	0.0128336
DDO	F1PAL6	0.511723	0.530529	0.599327	0.425779	0.492918	0.0527897
DDR1	F1PGJ7	0.288963	0.277686	0.295847	0.28208	0.317847	0.013482
DDX17	F1PID8	0.517015	0.444731	0.50409	0.543189	0.52994	0.0310771
DHCR7	E2RNQ5	0.497423	0.564006	0.568487	0.350563	0.430841	0.0877724
dhrs4	Q0E9S7	0.555729	0.385405	0.566744	0.545502	0.565956	0.0504482
DNAJC10	E2RCY4	0.483546	0	0.546496	0.496139	0.470953	0.142921
DNASE1L1	F1PWT3	0.66975	0.684199	0.693923	0.592417	0.655302	0.0326008
DPEP1	E2R4I6	1	NaN	1	1	1	0
DSC2	F1PEF1	0.251441	0.251209	0.245897	0.251673	0.256002	0.0026423
DSC3	F1PEF0	0.401709	0.390588	0.425108	0.41283	0.37571	0.0179097
DSG2	F1PGX2	0.475766	0.51754	0.5019	0.449631	0.438448	0.0328403
ECE1	F1PK66	0	0	0	0.202595	0	0.0506487
EFNA1	E2QUE4	0.177017	0.191323	0	0.296275	0.162711	0.0812219
EFNB1	E2QSB5	0.434149	0.381953	0.396761	0.4856	0.471538	0.044606
EGF	J9NZ75	0.532702	0.553054	0.791985	0.505747	0.512351	0.0817352
EGFR	F1PF03	0.400812	0.41684	0.385964	0.399077	0.402548	0.0085868
ELOVL1	E2RGY9	0.533146	0.552773	0.51352	0.562856	0.463895	0.0345534
EMC1	F1PN78	0.544953	NaN	0.618499	0.544953	0.219431	0.133023
ENPEP	F6XRM5	1	1	1	1	1	0
ENPP6	F1PZF9	1	1	1	1	0.835456	0.0411361
ENTPD3	E2RE57	0.82644	0.819285	0.815465	0.833595	0.864094	0.0157347
EPCAM	F1PM51	0.177139	0.163864	0.164962	0.228549	0.189315	0.0222592
EPHA1	E2R6A6	0.147364	0.0846658	0.111948	0.182781	0.192734	0.0447253
EPHA2	F1Q4C5	0.344929	0.338048	0.402994	0.348291	0.341567	0.0179177
EPHB2	F1PAF1	0.356648	0.379819	0.32876	0.405568	0.333477	0.0307874
EPHB4	F1PRQ8	0.357555	0.383375	0.357357	0.357753	0.307876	0.0189737
ERBB2	F1PIQ9	0.254643	0.256467	0.236024	0.252819	0.266831	0.00861375
ERBB3	F1PVC5	0.111673	0	0.0644385	0.179294	0.158907	0.0684408
ERBB4	F1PQ05	0.289177	0.0914424	0.312945	0.580695	0.265409	0.134197
ERGIC3	E2QW07	0.644292	NaN	0.644292	1	0	0.333333
ERMP1	F1PSG1	0.504931	0.520616	0.489245	0.545105	0.43258	0.0359737
ERP29	J9P4L2	0.582215	0.620749	0.7222	0.541998	0.543682	0.0643171
ESRP1	F1PSN8	0.383444	0.383444	0.510533	0.302554	NaN	0.0693263
F11R	F1PP71	0.221411	0.209182	0.20581	0.243644	0.23364	0.015573
FAM171A2	J9P3H5	0.182271	0.233323	0.0726847	0.131219	0.272334	0.0754384
FAS	F1P7Q7	0.208996	0.284743	0.133249	0.0626255	0.327808	0.104169
FCGRT	E2R0L6	0	0	0	0	0	0
FGFR2	F1PPD8	0.270079	0.293142	0.126955	0.263715	0.276443	0.0447287
FGFR3	F1PK02	0.428823	0.519823	0.568548	0.337823	0.291007	0.114885
FH	E2RGR9	0.499272	0.562621	0.530581	0.401536	0.467964	0.0559255
FKBP10	E2QZA8	0.745941	NaN	NaN	1	0.491881	0.254059
FLNA	F1PWW0	0.427088	0.282857	0.375985	0.537037	0.478191	0.0890965
FLRT2	E2RB35	0.346002	0.318257	0.210293	0.373748	0.414927	0.0650313
FLRT3	E2RKY7	0.450947	0.445418	0.359766	0.458912	0.456475	0.027551
FLVCR1	E2RSI2	0.3048	0.351758	0.367873	0.257842	0.175076	0.0716782
FN1	F1P6H7	0.458189	0.315768	0.38582	0.530558	0.790556	0.154881
folh1	I4IY07	0.728172	0.759799	0.589885	0.696545	0.827144	0.0751285
FOLR2	E2QXF0	0.68307	0.701113	0.687407	0.645987	0.678732	0.0159501
FRRS1	E2RSW3	0.26678	NaN	NaN	0.174397	0.359164	0.0923835
FUCA1	P48300	0.472948	0.238801	0.517572	0.461717	0.484179	0.0753082
FZD1	F1PCN5	0	0	NaN	0	NaN	0
FZD5	E2QVP7	0	NaN	0	0	0	0
FZD6	F1P9V1	0.149588	0.130367	0.168809	0.0371213	0.228519	0.0574598
GARS	F1Q332	0.614769	0.729291	0.616075	0.550303	0.613462	0.0454002
GLG1	F6V9R9	0.536679	0.521666	0.473684	0.554903	0.551692	0.0278114
GLIPR1	F1PE15	0.112479	0.122367	0.101241	0.207432	0.102591	0.0314916
GLS	E2RJ93	0.589447	0.538253	0.64064	0.436031	0.646531	0.0782219
GM2A	F1P8U3	0.587186	0.332288	0.388753	1	0.785618	0.266144
GNA13	F1PZW8	0.365301	NaN	NaN	0.730602	0	0.365301
GNAI2	P38400	0.460731	0.461249	0.515135	0.417652	0.460212	0.0246301
GNG12	J9P702	0.460045	0.459252	0.576998	0.44025	0.460838	0.0345835
gns	Q32KH4	0.549057	NaN	1	0.430567	0.549057	0.189811
GPC1	F1PPA1	0.500452	NaN	0.753075	0.415119	0.500452	0.112652
GPC4	F1PM35	0.0825462	0	0	0.257009	0.165093	0.105525
GPNMB	E2QUR7	0.496155	0.488755	0.52521	0.503555	0.471513	0.0171243
GPR107	F6USA6	0.222651	NaN	NaN	0	0.445303	0.222651
GPR89A	E2R506	0.476266	0.497184	0.625083	0.376142	0.455348	0.0726943
GPRC5A	F1PHN5	0.780322	NaN	NaN	1	0.560644	0.219678
GRN	E2RHN1	0.560533	0.465087	0.624455	0.608544	0.512521	0.0638478
HAVCR1	F1CME9	1	1	1	1	1	0
HEXB	K0J6C5	0.23151	NaN	NaN	0	0.463021	0.23151
HFE	F1PX48	0.0401417	0.0370281	0.0432554	0.0225152	0.486757	0.117617
HM13	E2RB97	0.55424	0.554239	0.555204	NaN	0.336566	0.0728794
HMGCL	E2RFD0	0.500058	0.503062	0.502804	0.476986	0.497312	0.00789225
HPN	E2RKP5	0.368994	0.379422	0.267677	0.358565	0.63737	0.0976378
HSD17B4	E2R4T7	0.493111	0.528149	0.603855	0.445879	0.458072	0.0570133
HSP90B1	F1P8N6	0.550236	0.466275	0.562931	0.569176	0.537542	0.0320725
HSPG2	J9NRJ0	0.308724	0.12015	0.14675	0.502523	0.470698	0.17658
HTRA1	F1PU95	0.193236	0.402481	0.159831	0	0.226641	0.117323
HYAL2	E2R560	0.500712	0.498509	0.56674	0.453869	0.502916	0.0293196
HYOU1	E2RB31	0.498202	0.5284	0.637881	0.468004	0.394289	0.075997
ICAM1	P33729	0.861711	0.852983	0.851013	0.870439	0.941123	0.0268913
IFI30	F1PK63	0.538851	0.768269	0.608405	0.469298	0.389987	0.129347
IFNGR1	F6XBS0	0	0	0	NaN	0	0
IGF1R	F1PXU6	0.31498	0.333601	0.306614	0.323346	0.302607	0.0119313
IGFBP7	E2RNL2	0	0	0	0	NaN	0
IGSF11	F1PJL3	0.561268	NaN	0.420257	NaN	0.702279	0.141011
IGSF3	F1P9K1	0.458448	0.465165	0.458875	0.45802	0.410185	0.0139586
IGSF5	E2RBD3	1	1	1	1	1	0
IGSF8	J9NWL5	0.408688	NaN	0	0.467543	0.408687	0.155848
IGSF9	F1PHY9	0.32462	0.347482	0.333475	0.315765	0.292767	0.0181065
IL1R1	F1PSF0	0.815314	NaN	1	0.815314	0.778769	0.0737437
IL1RAP	J9NU59	0.559532	0.507492	0.590164	0.528901	0.60255	0.0390803
IL6ST	F1PTB2	0.701848	0.488679	NaN	0.701848	0.949893	0.153738
ITGA1	F1PP33	0.330334	0.364869	0.324842	0.306785	0.335826	0.017267
ITGA2	E2REA9	0.532311	0.604754	0.569714	0.484606	0.494908	0.0487384
ITGA3	F1Q439	0.249588	0.282962	0.240474	0.229936	0.258701	0.0178131
ITGA6	E2RL88	0.286818	0.310578	0.286731	0.286906	0.27243	0.00958077
ITGAV	F1P8Q0	0.429062	0.459737	0.445872	0.412252	0.40084	0.0231293
ITGB1	E2RT60	0.346136	0.381953	0.351598	0.31934	0.340675	0.0183839
ITGB5	J9P3C1	0.545041	NaN	0.62254	0.486065	0.545041	0.0454918
ITGB6	E2RBL9	0.381308	0.390496	0.387408	0.361574	0.375208	0.0102805
ITGB8	F6X717	0.446913	0	0.278355	0.61547	0.653337	0.247613
ITPR3	E2RMC0	0.473271	0.372496	0.444514	0.525486	0.502029	0.0526261
KIAA1161	J9PAS5	0.0760881	0.0872755	0	0.0760881	NaN	0.0290918
KIRREL	F1Q051	0.0259541	0	0	0.0519082	0.127583	0.0448729
KTN1	E2RG27	0.464219	0.437358	0.497566	0.447045	0.481394	0.0236394
L1CAM	E2R2V6	0.577593	0.635075	0.621808	0.521558	0.533378	0.0504868
LAMA3	E2RPP1	0.396403	0.705329	0.395153	0.387892	0.397653	0.0799843
LAMB1	F1PCD8	0.421935	0.455519	0.23839	0.446524	0.397347	0.0665767
LAMB3	F1PFM5	0.406211	0.387345	0.339243	0.425078	0.452941	0.0378578
LAMC1	F1PHK9	0.295915	0.0710508	0.0854146	0.506415	0.549421	0.224842
LAMP1	F1Q260	0.474074	0.513363	0.59683	0.408992	0.434785	0.0666039
LAMP2	E2RNJ1	0.0904497	1	0	0	0.180899	0.295225
LDLR	F1PML2	0.361405	NaN	0.361405	0.475032	0.203525	0.0905021
LGALS3BP	E2RKQ6	0.53926	0.562301	0.594086	0.51622	0.499146	0.0352553
LGMN	E2QXF2	0.48478	0.481059	0.310389	0.488501	0.56656	0.0659036
LHFPL2	J9P9A6	0.515721	0.524407	0.533324	0.393882	0.507035	0.0392034
LIPH	F1PG57	0.231433	0.168097	0.252826	0.21004	0.324029	0.0496794
LMAN2	P49256	0.542799	0.549407	0.536192	0.558672	0.379783	0.0480261
LMF2	J9NVV3	0.518125	0.53307	0.548506	0.475114	0.50318	0.0258204
LRP1	J9P315	0.239141	0.197075	0.160915	0.281206	0.298926	0.0555356
LRPAP1	F1PAG7	0.852457	NaN	NaN	1	0.704915	0.147543
LSAMP	F1PJN2	0.724995	0.750986	0.734052	0.715938	0.708627	0.0151184
LSR	F1PKT2	0.129943	0.115127	0.0963996	0.1478	0.14476	0.0202583
LTBR	E2RG08	0.00985791	0	0.00652342	0.0131924	0.0976795	0.0260871
M6PR	E2R4C1	0.201234	0.209279	0.153884	0.19319	0.227675	0.02247
MAGT1	E2RRH2	0.546135	0.52585	0.56642	0.195831	0.575816	0.105138
MET	Q75ZY9	0.406018	0.402901	0.360007	0.41571	0.409136	0.0154843
METTL7A	J9NTA1	0.454483	0.44563	0.449056	0.498455	0.459909	0.0159192
MFGE8	F1PFZ5	0.731198	0.710263	0.67319	0.777593	0.752133	0.0365684
MFSD6	E2RK97	0.0437424	0	0	0.307171	0.0874847	0.0986638
MLEC	E2RD92	0.457238	0.478786	0.61067	0.412323	0.435689	0.0603609
MME	F5C3N2	1	NaN	NaN	1	1	0
MMP14	F1PXM2	0.264405	0.323767	0.0963187	0.304884	0.223925	0.077102
MMP15	F1P625	0.115909	0.0339691	0.0645575	0.16726	0.269396	0.0845322
MPZL1	J9NSZ7	0.124177	NaN	0	0.124177	0.159861	0.0532869
MRPL21	J9P2W1	0	0	0	NaN	0.436615	0.145538
MRPS35	E2R2D2	0.309461	0.517718	0	0.281405	0.337517	0.143458
MSLN	J9NX38	0.833529	0.976996	0.880513	0.65406	0.786543	0.104226
MUC1	J9P6J1	0.900582	0.894335	0.879569	0.906829	0.930691	0.0159039
MUC20	F1PJ84	0.928802	0.840174	0.857604	1	1	0.0755554
NCLN	E2QY93	0.412771	0.51293	0.60418	0.312611	0	0.201125
NCSTN	M1VEJ1	0.266569	0.24855	0	0.284589	0.393688	0.107432
NDUFA10	E2RIG0	0.488788	0.500481	0.418095	0.477096	0.598207	0.0508742
NEO1	J9P2T1	0.335229	0.101469	0.332839	0.337619	0.432673	0.0839961
NNT	F1PLG2	0.467061	0.546956	0.490939	0.29478	0.443182	0.0749835
NOTCH2	F1PPP5	0.22607	0	0.213897	0.297776	0.238242	0.0805306
NPC1L1	A0MJA4	0.929302	0.933957	0.931383	0.927221	0.923114	0.00375132
NPC2	Q28895	0.374622	0.374621	0.309764	NaN	0.679407	0.123214
NPDC1	F6XGX1	0	NaN	0	NaN	0	0
NPTN	F1PDQ0	0.0403893	0.0368074	0.0216239	0.0687166	0.0439712	0.0135641
NTN4	E2QZY0	0.179555	0	NaN	0.35911	NaN	0.179555
NUP155	F6XTD9	0.410594	0.256467	0.43731	0.383877	0.459862	0.0642069
NUP210	F1PSK9	0.506598	0.490327	0.63639	0.506598	NaN	0.0486876
OCLN	E2R3X4	0.155999	0	0.152169	0.15983	0.168653	0.0440788
OSMR	E2QWS7	0.630984	0.593098	0.628157	0.633812	0.908479	0.080259
P4HA1	E2RLB8	0.590578	0.606217	0.645737	0.574939	0.504177	0.0432095
P4HA2	F1PTP6	0.551891	0.648512	NaN	NaN	0.455271	0.0966203
PCCB	F1PTU4	0.482184	0.532912	0.507833	0.406174	0.456534	0.0445094
PCDH1	E2QX93	0.218903	0.190564	0.150699	0.247242	0.247623	0.0384004
PCYOX1	E2R1N7	0.38809	0.242679	1	0.533501	0.202968	0.271963
PGAP1	E2R8V9	0.493104	0.502163	NaN	0.493104	0.487581	0.00486078
PIGN	F1PVD7	0.689457	1	NaN	NaN	0.378913	0.310543
PIGO	E2RKS8	0.494334	0.557144	0.515755	0.472912	0.436397	0.0408977
PIGR	F6Y6T8	0.410541	0.36868	0.316108	0.452402	0.496134	0.0659372
PLAUR	E2RGN0	0.804346	0.794831	0.666268	0.813862	0.830681	0.045861
PLD3	E2QVP0	0.34958	NaN	0.561339	0.34958	0.338609	0.0742431
PLOD2	F1PZL5	0.448206	0.407331	0.337442	0.857272	0.489081	0.150395
PLOD3	E2RTL4	0.389395	NaN	0	0.389395	1	0.333333
PLXNA1	F1P6G0	0.216412	0.140724	0.177646	0.255179	0.391787	0.0821492
PLXNA2	F1PHZ1	0.420729	0.441092	0.446568	0.400367	0.327189	0.040026
PLXNB1	E2RM56	0.213483	0.215481	0.215434	0.209376	0.211531	0.00250205
PLXNB2	F1P9S5	0.306575	0.319719	0.308762	0.292214	0.304389	0.00796952
PLXNB3	F1PXM6	0	0	0.208706	NaN	0	0.0695687
PMPCA	F1PF09	0.488039	0.513042	0.463037	0.407385	0.632306	0.0687317
PNPLA6	E2RIR2	0.496524	0.37895	0.503956	0.496524	NaN	0.0416684
PODXL	F1PID4	0.927749	0.916995	0.918191	0.937308	0.949634	0.0129392
PON2	F1PSG5	0.482934	0.40258	0.513409	0.453829	0.512038	0.0422598
PPIB	F1PLV2	0.703352	0.554703	0.754108	0.741156	0.665548	0.068753
PRCP	F1PWK3	0.263883	0	NaN	NaN	0.527766	0.263883
PRKCSH	E2RKK6	0.794938	0.589877	1	1	0.578927	0.207799
PrP	O46593	0.697357	0.697913	0.706735	0.656406	0.696801	0.0128601
PTGER2	F1P776	0	0	0	NaN	NaN	0
PTGFRN	F1PR26	0.34591	0.379032	0.369785	0.322034	0.321543	0.02631
PTK7	E2RMT2	0.433105	0.46238	0.423371	0.39537	0.442838	0.0216192
PTPRA	E2R5J7	0	NaN	0	NaN	0	0
PTPRD	F1PH17	0.491686	0.440902	0.413124	0.564014	0.54247	0.0631145
PTPRF	E2RE80	0.364109	0.337168	0.334006	0.401709	0.39105	0.0303961
PTPRG	F1PWC1	0.272252	0.183889	0.25906	0.287581	0.285444	0.0325188
PTPRJ	F1P983	0.94084	0.970793	0.867121	0.930718	0.950962	0.0309793
PTPRM	F1PUP2	0.422039	0.420981	0.430783	0.402681	0.423097	0.0075545
PTPRO	F1PWH3	1	0.743747	1	1	1	0.0640632
PTPRS	E2R6Z2	0.153714	0.0775257	0.0648297	0.229903	0.310181	0.0994321
PVR	F1PVS7	0.361759	0.39032	0.383655	0.339863	0.309251	0.031215
RAB10	F2Z4P9	0.464412	0.552773	0.488828	0.410482	0.439997	0.0477803
RAB13	F1PTE3	0.45949	0.475881	0	0.493012	0.4431	0.131448
RAB25	E2RQ15	0.499792	0.53326	0.580939	0.466324	0.436947	0.052732
RAB5A	P18066	0.455618	0.404181	0.499153	0.443432	0.467803	0.0298357
RAB5C	P51147	0.470091	0.375411	0.466957	0.541436	0.473224	0.0430731
RAB8A	P61007	0.460024	0.501553	0.511919	0.407032	0.418496	0.0469862
RAB9A	P24408	0.524956	NaN	0.381353	0.597996	0.524956	0.0722142
RAC1	P62999	0.482071	0.474147	0.489995	0.389452	0.535782	0.0405444
RDH14	J9NWS8	0.485187	0.380827	0.511294	0.45908	0.593574	0.0662402
RELL1	E2QUZ0	0.129181	0.148788	0.112846	0.0270903	0.145516	0.038592
RPN1	E2RQ08	0.515467	0.538397	0.56269	0.477966	0.492536	0.0326463
RPSA	J9JHJ2	0.421457	0.422443	0.420472	0.412307	0.519622	0.0273217
RTN4	E2R925	0.58224	0.565004	0.599477	0.624069	0.553201	0.0263352
SCARB1	F1PQT1	1	1	1	NaN	NaN	0
SCPEP1	J9NRZ7	0.535701	0.617968	0.453434	1	0.0962965	0.267059
SDC4	J9NZ79	0.0823744	0.0439686	0.0408067	0.125683	0.12078	0.0404219
SDHB	Q0QEY4	0.492378	0.54345	0.681906	0.361889	0.441306	0.10554
SEC61A1	J9NXA9	0.487189	0.580961	0.492215	0.479219	0.482164	0.0279482
SEMA4B	F1P9X6	0.311287	0.202772	0.230309	0.410569	0.392265	0.092438
SEMA4C	E2RHV1	0.3557	0.27131	0.194945	0.440089	0.453213	0.106762
SEMA4D	F1PSB1	0.380954	0.314926	0.29931	0.446982	0.484791	0.0793842
SEMA4G	E2RP18	0.103818	0	0.0381043	0.1993	0.169531	0.0826817
SERPINH1	E2RHY7	0.496657	0.480692	0.544372	0.485337	0.507978	0.0215801
SFTPD	E2QWR0	0.683079	NaN	0	0.683079	1	0.333333
SIAE	F1PXN3	0.531378	0.453906	0.60885	NaN	NaN	0.077472
SIGIRR	F1PY07	0.0829485	0	0	0.165897	0.172323	0.0845549
SLC12A2	F1P9W5	0.166793	0.107394	0.130275	0.20331	0.280655	0.061574
SLC12A6	F1Q2J3	0.120197	0.127075	0.416088	0	0.11332	0.107461
SLC12A7	F1PKH1	0.220253	0	0.353578	0.220253	NaN	0.117859
SLC15A4	F1PWH8	0.463101	0.619064	NaN	0.463101	0.44358	0.0584946
SLC16A1	F1PCQ3	0.194931	0.217788	0.173407	0.180379	0.209483	0.0183712
SLC16A3	J9NVM8	0.363214	0.404563	0.455743	0.248749	0.321866	0.0724228
SLC1A4	F1Q0H9	0	0	0	0	0	0
SLC1A5	K7ZSN9	0.0533641	0	0.0592991	0.047429	0.307245	0.0797787
SLC22A2	F1Q431	0.343763	0.426182	NaN	0.261344	NaN	0.0824192
SLC27A4	F1PAM6	0.515028	0.514486	0.515571	0.471118	1	0.132492
SLC2A1	F1PWN2	0.468127	0.505781	0.552634	0.345866	0.430473	0.0705191
SLC31A1	J9P9D2	0.301893	0	0.404672	0.308411	0.295376	0.104427
SLC33A1	E2RTD2	0.380025	0.355656	0.58329	0.404394	0.335052	0.074244
SLC35F6	J9P2U5	0.536953	0.536234	0.537673	0.639055	0.444012	0.0491205
SLC37A4	F1PPG9	0.526501	0.587733	0.427179	0.544094	0.508908	0.048935
SLC39A4	F1PC23	0.907583	0.85355	0.901127	0.928837	0.914039	0.0220497
SLC39A6	E2RMA6	0.139036	0.176878	0.0153087	0.285412	0.101195	0.0864464
SLC39A7	Q5TJF6	0.435232	0.500873	0	0.435233	NaN	0.166958
SLC3A2	F1PRC5	0.202193	0.233256	0.219486	0.184901	0.170783	0.0242647
SLC44A1	E2R949	0.132548	0.134108	0.0989694	0.130988	0.138882	0.0107583
SLC44A2	J9P0D9	0.263766	0.281299	0.219483	0.246233	0.352143	0.0419316
SLC44A4	F1P9U5	0.947277	0.879646	0.95355	0.950337	0.944216	0.0200062
SLC4A7	J9PAF7	0.0631631	0.060062	0.0822935	0.0423077	0.0662641	0.011547
SLC52A3	E2RM06	1	NaN	1	1	1	0
SLC5A6	E2R9T1	0.763396	0.910945	0.726091	0.800701	0.689026	0.074132
SLC6A6	Q00589	0.225562	0.295805	0	0.175182	0.275942	0.0991413
SLC7A5	F1PH98	0.182914	0.264427	0.171994	0.186091	0.179737	0.0246967
SLC9A1	F1PID1	0.0785345	0.120793	0.066305	0.0540788	0.0907641	0.0227932
SLIT3	F1Q3G2	0.380814	0.197268	0.127704	0.56436	0.566854	0.20156
SLITRK4	F1Q4K7	0.416683	0.390188	0.439124	0.402145	0.431221	0.0195031
SPINT1	F1PQ47	0.353978	0.33361	0.327833	0.383997	0.374345	0.024225
SPINT2	F1P984	0.224864	0.172666	0.200602	0.249127	0.251236	0.0317737
SSR1	P16967	0.511895	0.47828	0.545511	0.138648	0.712705	0.160322
SSR4	E2QY54	0.544414	0.589167	0.634823	0.451518	0.499661	0.0682026
ST14	F1PF63	0.20592	0.187283	0.172557	0.224556	0.311136	0.0439631
STEAP3	F1P8R0	0.287905	0.240104	0.277466	0.298344	0.415867	0.0491602
STT3A	F1PJP5	0.508325	0.509535	0.547572	0.480396	0.507115	0.017399
STT3B	E2RG47	0.476469	0.547608	0.540917	0.298866	0.41202	0.0944097
SUCLG1	E2R0Y5	0.443505	0.417845	0.544237	0.313483	0.469166	0.0705186
SUOX	F1PVD4	0.500378	0.274725	0.44087	1	0.559886	0.211073
SYNGR2	F1PZ37	1	1	1	NaN	0	0.333333
SYPL1	E2RC10	0.323772	0.327401	0.33659	0.242453	0.320142	0.0253488
TAPBP	Q5TJE4	0.535005	0.59836	0.593502	0.476509	0.472353	0.0607499
TBL2	E2RP67	0.478325	0.532278	0.565788	0.346217	0.424371	0.0818697
TENM4	F1PFD6	0.502297	0.654761	0.543206	0.461387	0.438699	0.0744703
TEX264	E2RAC8	0.463778	NaN	0.55171	NaN	0.375846	0.0879322
TF	F6V1W9	0.437723	0.437028	0.506292	0.438418	0.436555	0.0177816
TGFBR3	F1PIG0	0.310391	0.309709	0.311073	0.298557	0.351967	0.0136934
TIMM21	E2R117	0.496231	NaN	0.626663	0	0.496231	0.208888
TINAGL1	E2QXH3	0.248589	0	0.187052	0.329644	0.310126	0.11318
TM2D3	F6UUM9	0.234444	0.606197	NaN	0.234444	0.176705	0.143164
TM7SF2	E2RS95	0.512376	0.564515	0.575429	0.444173	0.460236	0.0588839
TM9SF2	E2R5Z5	0.415537	0.512671	0.427088	0.232093	0.403985	0.0759201
TM9SF3	E2RSD0	0.440848	0.571481	0.474412	0.290226	0.407284	0.0870956
TMED10	E2QYL0	0.537207	0.580961	0.697825	0.493453	0.464399	0.0802333
TMED9	F6XD36	0.494881	0.609405	0.528969	0.458017	0.460794	0.0548908
TMEM109	J9P616	0.604537	0.546661	0.662413	0.792605	0.471195	0.10929
TMEM2	F1PH14	0.353449	0.323045	0.328671	0.399202	0.378228	0.0314282
TMEM30A	E2R2Z8	0.34899	0.43701	0.418324	0.0666413	0.279656	0.127259
TMPRSS11E	F1Q3A2	0.296814	0.318761	0.303409	0.270096	0.290218	0.0154641
TMX1	E2RK67	0.53308	0.589847	0.559859	0.434147	0.506302	0.0523144
TMX3	F1PIX5	0.515502	0.431821	NaN	0.515502	0.680645	0.0829413
TPBG	E2QXI6	0.292623	0.230106	0.286963	0.335966	0.298282	0.0292947
TRPA1	F1Q2M0	0	0	0.414062	0	0	0.103516
TSPAN1	J9NS67	0.645299	0.537486	NaN	0.645299	1	0.154171
TSPAN14	E2QZH1	0.227526	0.112623	0.213679	0.251114	0.241373	0.0415462
TSPAN15	E2RS68	0.128063	0.0535785	0.126678	0.129448	0.166617	0.0289522
TSPAN33	F1PEJ5	0.0336233	0	0	0.0672466	0.1488	0.0540116
TSPAN6	F1PMP0	0	0	0	0	NaN	0
TSPAN8	E2QSC8	0.220399	0.236408	0.239503	0.190222	0.204391	0.0203245
TTYH3	F1P9A7	0.316928	0.335457	0.133871	0.302247	0.331608	0.0577366
UNC93B1	F1PXK2	0.413717	0.548937	0	0.34785	0.479583	0.170167
UPK3B	E2R4D0	0.838059	0.829809	0.860818	0.846309	0.82947	0.0119619
VASN	E2RRN8	0.121077	0.0511839	0.0768058	0.165349	0.165359	0.0506795
VASP	P50551	0.523627	0.451527	0.523525	0.52373	0.54761	0.0240718
VCAN	J9P884	0.1966	0.0529218	0.137766	0.255434	0.27945	0.0860489
VDAC2	E2R948	0.476323	0.57607	0.541095	0.343554	0.41155	0.0905151
VLDLR	F1P787	0.100118	0.118711	0.0815255	0.0391785	0.299839	0.0744617
VNN1	Q9TSX8	0.749991	0.735633	0.779685	0.738263	0.761719	0.016877
VSIG10	J9P1R7	0.175805	0.240734	0	1	0.110876	0.282464
WFDC2	F1PDT8	0.485676	0.566098	0.485676	0.357676	NaN	0.0694738

## Sheet: 4. Apicobasal sorting
Ratio H/L AP_1	Ratio H/L AP_2	Ratio H/L AP_3	Ratio H/L AP_TA_1	Ratio H/L AP_TA_2	Ratio H/L AP_TA_3	Ratio H/L BL_1	Ratio H/L BL_2	Ratio H/L BL_3	Ratio H/L BL_TA_1	Ratio H/L BL_TA_2	Ratio H/L BL_TA_3	Only identified by site	Reverse	Potential contaminant	Surfaceome	Student's T-test Significant Ratio H/L AP_Ratio H/L AP_TA	Student's T-test significant	Student's T-test Significant Ratio H/L BL_Ratio H/L BL_TA	Student's T-test significant_	Student's T-test Significant Ratio H/L AP_Ratio H/L BL	Student's T-test significant__	Peptides	Razor + unique peptides	Unique peptides	Sequence coverage [%]	Unique + razor sequence coverage [%]	Unique sequence coverage [%]	Mol. weight [kDa]	Q-value	Score	Intensity	Intensity L	Intensity H	-Log Student's T-test p-value Ratio H/L AP_Ratio H/L AP_TA	Student's T-test q-value Ratio H/L AP_Ratio H/L AP_TA	Student's T-test Difference Ratio H/L AP_Ratio H/L AP_TA	Student's T-test Test statistic Ratio H/L AP_Ratio H/L AP_TA	-Log Student's T-test p-value Ratio H/L BL_Ratio H/L BL_TA	Student's T-test q-value Ratio H/L BL_Ratio H/L BL_TA	Student's T-test Difference Ratio H/L BL_Ratio H/L BL_TA	Student's T-test Test statistic Ratio H/L BL_Ratio H/L BL_TA	-Log Student's T-test p-value Ratio H/L AP_Ratio H/L BL	Student's T-test q-value Ratio H/L AP_Ratio H/L BL	Student's T-test Difference Ratio H/L AP_Ratio H/L BL	Student's T-test Test statistic Ratio H/L AP_Ratio H/L BL	Ratio H/L AP	Ratio H/L AP_TA	Ratio H/L BL	Ratio H/L BL_TA
0.2716	0.27464	0.31442	0.38059	0.39686	0.37115	0.2808	0.30388	0.27465	0.28035	0.3234	0.30291				CTNNB1	+	Ratio H/L AP_Ratio H/L AP_TA					33	29	29	52.9	48.4	48.4	85.51	0	323.31	630010000000	489760000000	140260000000	2.32991	0.00437037	-0.419051	-2.41523	0.301775	0.755351	-0.0733946	-0.374949	0.00144823	0.982327	0.000359774	0.00198714	0.27464	0.38059	0.2808	0.301875
0.18328	0.18875	0.15997	0.36832	0.36747	0.33448	0.14782	0.13844	0.1562	0.18684	0.21407	0.15182				EFNB1	+	Ratio H/L AP_Ratio H/L AP_TA					14	14	14	37.9	37.9	37.9	34.699	0	323.31	174010000000	147390000000	26620000000	3.51098	0	-1.01073	-5.41611	1.69065	0.0697778	-0.441111	-2.22963	1.38249	0.168	0.263944	1.39584	0.18328	0.36747	0.14782	0.200455
0.071746	0.055524	0.087091	NaN	0.098436	0.088829	0.061022	0.071612	0.069145	0.073851	0.083983	0.07615				TSPAN8	+	Ratio H/L AP_Ratio H/L AP_TA					9	9	9	32.1	32.1	32.1	25.802	0	323.31	204550000000	193610000000	10936000000	0.70695	0.0497	-0.412264	-1.18128	0.868086	0.33329	-0.230972	-1.0801	0.120812	0.865403	0.0664592	0.221016	0.071746	0.0936325	0.069145	0.078917
0.043008	0.042241	0.047754	0.051368	0.056328	0.050861	0.055989	0.058709	0.051192	0.064618	0.066845	0.05335				FOLR2	+	Ratio H/L AP_Ratio H/L AP_TA					22	22	18	52.5	52.5	40.8	29.669	0	323.31	1028800000000	991860000000	36951000000	1.60762	0.0263333	-0.254137	-1.474	1.32868	0.273882	-0.251497	-1.42086	1.78565	0.0611429	-0.318591	-1.76976	0.043008	0.051368	0.055989	0.0657315
0.093158	0.11287	0.10379	0.18407	0.18649	0.19521	0.12543	0.13849	0.13153	0.18368	0.18672	0.17908				TPBG	+	Ratio H/L AP_Ratio H/L AP_TA	+	Ratio H/L BL_Ratio H/L BL_TA	+	Ratio H/L AP_Ratio H/L BL	14	14	14	36.9	36.9	36.9	45.695	0	270.92	163790000000	147060000000	16726000000	3.31131	0	-0.872766	-4.73896	2.55303	0	-0.491683	-3.19282	1.77117	0.0463333	-0.355325	-1.86869	0.10379	0.18649	0.13153	0.1852
0.24157	0.24515	0.30492	0.97768	1.0959	0.89493	0.24932	0.31056	0.29144	0.45599	0.59424	0.49806				CLU	+	Ratio H/L AP_Ratio H/L AP_TA	+	Ratio H/L BL_Ratio H/L BL_TA			21	21	19	43.4	43.4	38.7	51.789	0	323.31	154770000000	92266000000	62506000000	3.8055	0	-1.91021	-8.03669	1.74144	0	-0.881334	-3.06874	0.303344	0.792392	-0.107178	-0.439706	0.24515	0.97768	0.29144	0.525115
0.053415	0.052048	0.054625	0.074496	0.076104	0.069092	0.052338	0.05601	0.048515	0.052144	0.059959	0.050709				BSG	+	Ratio H/L AP_Ratio H/L AP_TA					23	23	23	59	59	59	29.302	0	323.31	1545100000000	1479200000000	65853000000	3.2037	0	-0.455668	-3.10301	0.371681	0.696121	-0.0992473	-0.477727	0.191421	0.887696	0.0315582	0.19342	0.053415	0.074496	0.052338	0.0560515
0.27659	0.27392	0.27874	0.44824	0.48035	0.44611	0.29255	0.3008	0.28404	0.29588	0.3168	0.30361				CDH6	+	Ratio H/L AP_Ratio H/L AP_TA					32	32	30	35.3	35.3	30.8	88.65	0	323.31	1212700000000	952350000000	260330000000	4.49032	0	-0.728444	-5.38654	0.585044	0.715881	-0.0664316	-0.449001	1.50204	0.688129	-0.0810528	-0.648604	0.27659	0.44824	0.29255	0.30634
0.35217	0.32827	0.34545	0.51193	0.49993	0.47431	0.32514	0.35984	0.32697	0.32896	0.37763	0.33644				L1CAM	+	Ratio H/L AP_Ratio H/L AP_TA					54	54	54	39.6	39.6	39.6	140.05	0	323.31	1483500000000	1111200000000	372290000000	3.56325	0	-0.534624	-3.70173	0.261024	0.698682	-0.0649177	-0.33083	0.135561	0.915624	0.0206856	0.132354	0.34545	0.49993	0.32697	0.353295
0.022628	0.027882	0.020885	0.035791	0.045642	0.029482	0.040695	0.026711	0.024497	0.019748	0.026595	0.020669				ITGB6	+	Ratio H/L AP_Ratio H/L AP_TA					35	35	35	48.8	48.8	48.8	88.344	0	323.31	1246100000000	1227500000000	18647000000	1.32215	0.0098125	-0.623294	-1.94354	0.475454	0.4415	0.381866	0.881975	0.584983	0.379826	-0.338327	-0.944916	0.022628	0.035791	0.026711	0.0231715
0.21321	0.20698	0.20452	0.47649	0.53496	0.43061	0.1944	0.21414	0.20178	0.22413	0.23475	0.20781				PTPRF	+	Ratio H/L AP_Ratio H/L AP_TA					92	92	83	60	60	54.1	210.83	0	323.31	724480000000	607200000000	117280000000	3.69892	0	-1.20142	-6.2515	1.23965	0.34	-0.174275	-1.1026	0.318991	0.84992	0.0345476	0.23929	0.20698	0.47649	0.20178	0.22944
0.058098	0.053238	0.057069	0.11793	0.1248	0.10776	0.056909	0.061616	0.053394	0.060841	0.061758	0.060493				ITGA2	+	Ratio H/L AP_Ratio H/L AP_TA					62	62	62	43.7	43.7	43.7	129.67	0	323.31	2461400000000	2314800000000	146550000000	3.88439	0	-1.05583	-6.11474	0.538688	0.665517	-0.099622	-0.561005	0.148426	0.886313	-0.0283291	-0.165606	0.057069	0.11793	0.056909	0.0612995
0.17428	0.17009	0.17307	0.99354	1.0783	0.88614	0.17556	0.17937	0.16825	0.18338	0.20762	0.18125				CDH16	+	Ratio H/L AP_Ratio H/L AP_TA					26	26	26	38	38	38	90.032	0	323.31	700940000000	596410000000	104530000000	5.15252	0	-2.51058	-13.736	0.920894	0.405081	-0.162554	-0.926862	0.205847	0.928419	-0.0154827	-0.119956	0.17307	0.99354	0.17556	0.1955
0.1943	0.17729	0.21756	0.2859	0.26481	0.25215	0.23298	0.22437	0.18635	0.26224	0.23076	0.24752				FLRT3	+	Ratio H/L AP_Ratio H/L AP_TA					23	23	23	44.2	44.2	44.2	73.141	0	191.03	150510000000	132260000000	18253000000	1.95893	0.00732203	-0.449647	-2.24405	0.591206	0.469023	-0.20394	-0.829716	0.407942	0.746952	-0.126097	-0.545425	0.1943	0.26481	0.22437	0.2465
0.094902	0.084721	0.087223	0.16715	0.2124	0.18492	0.094376	0.096813	0.082956	0.090774	0.083526	0.10286				ITGA6	+	Ratio H/L AP_Ratio H/L AP_TA					47	47	47	49.1	49.1	49.1	122.04	0	323.31	289180000000	269740000000	19436000000	3.1888	0	-1.07558	-5.08388	0.25738	0.704598	0.0664035	0.332589	0.166364	0.888103	-0.0373668	-0.20235	0.087223	0.18492	0.094376	0.08715
0.10082	0.10127	0.10743	0.32388	0.37273	0.29393	0.1005	0.1014	0.096517	0.10124	0.11858	0.10239				PTK7	+	Ratio H/L AP_Ratio H/L AP_TA					41	41	41	45.3	45.3	45.3	118.42	0	323.31	734840000000	670790000000	64053000000	4.06168	0	-1.67189	-8.20533	0.664386	0.532936	-0.139784	-0.737325	0.643919	0.835228	0.0524258	0.383326	0.10127	0.32388	0.1005	0.10991
0.20619	0.2279	0.22834	0.37795	0.38031	NaN	0.22478	0.22619	0.23809	0.22305	0.22996	0.22761				CD151	+	Ratio H/L AP_Ratio H/L AP_TA					5	5	5	18.7	18.7	18.7	29.236	0	72.623	51896000000	42618000000	9277800000	2.95047	0	-0.781499	-4.79896	0.196822	0.853861	0.0198102	0.143868	0.451987	0.826576	-0.0579989	-0.373545	0.2279	0.37913	0.22619	0.226505
0.037032	0.034544	0.038219	0.077621	0.077293	0.068161	0.037893	0.042651	0.034638	0.039677	0.045625	0.040114				ITGB1	+	Ratio H/L AP_Ratio H/L AP_TA					53	53	53	43.6	43.6	43.6	88.123	0	323.31	2590300000000	2504900000000	85394000000	3.77167	0	-1.02141	-5.83343	0.47055	0.61656	-0.153442	-0.652818	0.268514	0.836812	-0.0651229	-0.330527	0.037032	0.077293	0.037893	0.042651
0.68666	0.59933	0.7118	0.94041	1.1026	0.95768	0.68029	0.53402	0.77203	0.95649	0.81758	0.80334				FN1	+	Ratio H/L AP_Ratio H/L AP_TA					33	33	33	18.7	18.7	18.7	267.24	0	137.15	85479000000	48033000000	37446000000	2.30313	0	-0.587084	-2.86743	0.85071	0.2864	-0.433988	-1.36321	0.041046	0.934783	0.020906	0.076484	0.68666	0.95768	0.68029	0.887035
0.18576	0.17375	0.19346	0.26873	0.26961	0.25017	0.19092	0.1966	0.18952	0.18538	0.20779	0.19317				CADM1	+	Ratio H/L AP_Ratio H/L AP_TA					20	20	20	53.5	53.5	53.5	44.494	0	323.31	658530000000	576470000000	82058000000	3.06326	0	-0.512484	-3.25797	0.166155	0.836367	-0.0292787	-0.177653	0.582535	0.803019	-0.0626979	-0.423646	0.18576	0.26873	0.19092	0.196585
0.06066	0.058375	0.06051	0.083159	0.085098	0.080206	0.060037	0.063562	0.057727	0.06084	0.065146	0.062553				ITGAV	+	Ratio H/L AP_Ratio H/L AP_TA					80	80	80	61.1	61.1	61.1	112.53	0	323.31	4770300000000	4538900000000	231420000000	3.97221	0	-0.468479	-3.58626	0.380408	0.74374	-0.0599275	-0.365993	0.109237	0.922813	-0.0133311	-0.0924974	0.06051	0.083159	0.060037	0.062993
0.17449	0.13073	0.17291	0.12433	0.13612	0.11691	NaN	0.58858	0.65659	NaN	NaN	0.90734				PTPRJ	+	Ratio H/L AP_Ratio H/L AP_TA			+	Ratio H/L AP_Ratio H/L BL	22	22	22	22.7	22.7	22.7	135.85	0	209.77	100030000000	92262000000	7770500000	1.03284	0.0317808	0.331768	1.32259	-4.34294e-08	1	0	0	2.74892	0	-1.9762	-6.90895	0.17291	0.12433	0.622585	NaN
0.27536	0.24955	0.25209	0.38585	0.52206	0.36531	0.26106	0.29101	0.26067	0.26931	0.32113	0.31673				CXADR	+	Ratio H/L AP_Ratio H/L AP_TA					25	25	25	68.7	68.7	68.7	39.487	0	323.31	264660000000	206410000000	58255000000	1.85651	0	-0.695597	-2.6111	0.423065	0.650733	-0.120321	-0.555861	0.392068	0.826414	-0.0643627	-0.380221	0.25209	0.38585	0.26106	0.29522
0.12701	0.12225	0.12238	0.21305	0.24867	0.20296	0.12929	0.12931	0.12625	0.12993	0.11602	0.12443				IGSF3	+	Ratio H/L AP_Ratio H/L AP_TA					57	57	57	55.2	55.2	55.2	134.1	0	323.31	568290000000	519810000000	48480000000	3.11792	0	-0.833492	-4.38234	0.411702	0.75	0.0631884	0.388472	1.10772	0.795852	-0.0505278	-0.416039	0.12238	0.21305	0.12929	0.122975
0.119	0.079788	0.10991	0.25237	0.12788	0.19698	NaN	NaN	NaN	NaN	NaN	NaN				SLC44A4	+	Ratio H/L AP_Ratio H/L AP_TA					10	10	10	14	14	14	78.876	0	105.06	72847000000	66254000000	6592800000	1.21364	0.010129	-0.868951	-1.99102	-4.34294e-08	1	0	0	-4.34294e-08	1	0	0	0.10991	0.19698	NaN	NaN
0.38833	0.40401	0.40112	0.70603	0.88987	0.76348	0.38511	0.4643	0.43154	0.42439	0.48168	0.43972				SEMA4B	+	Ratio H/L AP_Ratio H/L AP_TA					26	26	26	34.6	34.6	34.6	92.366	0	323.31	273660000000	188740000000	84917000000	3.21726	0	-0.976735	-4.89321	0.27703	0.756	-0.0867921	-0.390815	0.537814	0.735535	-0.098038	-0.543347	0.40112	0.76348	0.43154	0.453035
0.31566	0.29291	0.29466	0.51289	0.55807	0.51929	0.3173	0.33646	0.31106	0.30407	0.34959	0.30073				CDH1	+	Ratio H/L AP_Ratio H/L AP_TA					33	33	33	33.2	33.2	33.2	97.754	0	323.31	787470000000	607170000000	180300000000	4.03636	0	-0.815919	-5.38955	0.0817834	0.857486	-0.0205419	-0.109908	0.916152	0.652941	-0.0951984	-0.64096	0.29466	0.51929	0.3173	0.32683
0.075964	NaN	0.091994	0.17519	NaN	0.13859	NaN	0.10053	0.10729	NaN	NaN	NaN				EPHB2	+	Ratio H/L AP_Ratio H/L AP_TA					23	21	20	31	29.1	27.4	107.44	0	312.31	95720000000	92545000000	3175300000	1.26535	0.00708197	-0.898372	-2.82246	-4.34294e-08	1	0	0	0.78256	0.288571	-0.313071	-1.27331	0.083979	0.15689	0.10391	NaN
0.087855	0.10167	0.10699	0.45738	0.48623	0.46588	0.17381	0.17899	0.16519	0.26478	0.32741	0.2808				ICAM1	+	Ratio H/L AP_Ratio H/L AP_TA	+	Ratio H/L BL_Ratio H/L BL_TA	+	Ratio H/L AP_Ratio H/L BL	22	22	22	31.6	31.6	31.6	58.123	0	323.31	280510000000	225150000000	55360000000	4.83813	0	-2.25347	-11.9164	2.09392	0	-0.770774	-3.46861	3.04132	0	-0.808983	-4.2211	0.10167	0.46588	0.17381	0.296095
0.24136	0.23107	0.24384	0.21776	0.21226	0.20521	0.24312	0.25941	0.23816	0.24485	0.25956	0.24939				ATP1A1	+	Ratio H/L AP_Ratio H/L AP_TA					64	64	41	50	50	32.5	112.81	0	323.31	4017900000000	3285600000000	732330000000	2.13812	0.0325867	0.17326	1.28944	0.203617	0.834863	-0.0310385	-0.197311	0.469045	0.84819	-0.0477941	-0.331634	0.24136	0.21226	0.24312	0.252205
0.47117	0.63648	0.53561	1.7661	1.7177	1.6893	0.62675	0.62726	0.77299	0.82826	0.75786	0.73544			+	THBS1	+	Ratio H/L AP_Ratio H/L AP_TA					38	38	38	36.8	36.8	36.8	129.61	0	323.31	176260000000	66977000000	109290000000	3.70806	0	-1.66524	-7.33311	0.731373	0.373882	-0.236873	-0.993396	0.887284	0.263789	-0.306619	-1.17462	0.53561	1.7177	0.62726	0.79306
0.081432	0.05031	0.043577	0.084492	0.11894	0.072556	0.034885	0.043237	0.042039	0.044081	0.053796	0.044796				DSC2	+	Ratio H/L AP_Ratio H/L AP_TA					46	46	6	48.6	48.6	6.9	100.82	0	323.31	886990000000	864110000000	22884000000	0.916621	0.0267042	-0.676688	-1.52148	0.747622	0.339867	-0.288294	-1.08816	0.793952	0.203556	0.497802	1.27784	0.05031	0.084492	0.042039	0.0489385
0.17478	0.16153	0.15588	0.32055	0.34388	0.30844	0.20547	0.20103	0.2021	0.18297	0.19313	0.19963				EGFR	+	Ratio H/L AP_Ratio H/L AP_TA			+	Ratio H/L AP_Ratio H/L BL	29	26	25	31.4	28.9	28	131.53	0	323.31	172670000000	152400000000	20269000000	3.90133	0	-0.983222	-5.88734	1.39877	0.476952	0.109879	0.835373	2.46196	0.0404	-0.307877	-2.05667	0.16153	0.32055	0.2021	0.18805
0.17744	0.16352	0.16715	0.25484	0.22195	0.24846	0.51684	0.49113	0.4953	0.52671	0.39729	0.46039				MFGE8	+	Ratio H/L AP_Ratio H/L AP_TA			+	Ratio H/L AP_Ratio H/L BL	14	14	14	39.5	39.5	39.5	47.824	0	247.55	106430000000	85526000000	20901000000	2.71401	0	-0.511633	-2.99775	0.338863	0.669714	0.131108	0.515286	5.51185	0	-1.56539	-11.0285	0.16715	0.24846	0.4953	0.462
0.085681	NaN	0.044127	0.095089	0.12053	0.5029	0.070671	0.061071	0.077883	0.16038	0.070744	0.074116				CD302	+	Ratio H/L AP_Ratio H/L AP_TA					55	55	55	31.8	31.8	31.8	198.29	0	323.31	579550000000	561250000000	18294000000	0.635082	0.033027	-1.54395	-1.36334	0.564197	0.33531	-0.615377	-1.10021	0.172129	0.841533	-0.17732	-0.369205	0.064904	0.12053	0.070671	0.115562
0.46632	0.47867	0.50524	0.85216	0.7547	0.8136	0.55381	0.61865	0.44482	0.48124	0.51504	0.51055				VCAN	+	Ratio H/L AP_Ratio H/L AP_TA					20	20	20	6.4	6.4	6.4	369.5	0	323.31	136190000000	89750000000	46437000000	3.56206	0	-0.738009	-4.57343	0.2077	0.712889	0.101525	0.35726	0.430313	0.693474	-0.144805	-0.593659	0.47867	0.8136	0.55381	0.49814
0.14432	0.14921	0.14781	0.16628	0.16987	0.15924	0.20167	0.22406	0.19513	0.23124	0.24827	0.22565				CPM	+	Ratio H/L AP_Ratio H/L AP_TA			+	Ratio H/L AP_Ratio H/L BL	15	15	15	43.5	43.5	43.5	41.429	0	223.99	311750000000	267850000000	43905000000	2.23789	0.0351579	-0.166296	-1.27011	1.04603	0.354462	-0.213878	-1.14657	2.86273	0	-0.489986	-3.02792	0.14781	0.16628	0.20167	0.239755
0.087159	0.085078	0.095326	0.13419	0.1295	0.13233	0.094381	0.10071	0.085072	0.088635	0.10499	0.096944				ADAM10	+	Ratio H/L AP_Ratio H/L AP_TA					38	38	38	42.7	42.7	42.7	85.069	0	323.31	1176500000000	1087100000000	89392000000	3.39391	0	-0.567283	-3.7298	0.140826	0.822	-0.0502563	-0.219362	0.303476	0.839806	-0.0646702	-0.346378	0.087159	0.13233	0.094381	0.0968125
0.059843	0.056417	0.059153	0.079857	0.078687	0.075084	0.063902	0.068908	0.060376	0.060029	0.065699	0.062958				DSG2	+	Ratio H/L AP_Ratio H/L AP_TA					71	71	71	59.4	59.4	59.4	122.36	0	323.31	3081400000000	2928300000000	153120000000	3.42147	0	-0.413428	-3.00999	0.143125	0.833979	0.0340703	0.182928	1.05896	0.45008	-0.137581	-0.854267	0.059153	0.078687	0.063902	0.062864
0.36094	0.42819	0.41832	0.96383	1.1358	0.96443	0.37145	0.42289	0.32957	0.37021	0.42682	0.52683				PTPRD	+	Ratio H/L AP_Ratio H/L AP_TA					49	40	35	35.9	29.9	26.5	211.76	0	323.31	141120000000	95743000000	45376000000	3.58339	0	-1.34316	-6.38698	0.229528	0.734205	-0.092974	-0.365496	0.341703	0.783917	0.106861	0.465837	0.41832	0.96443	0.37145	0.398515
0.2259	0.23942	0.25264	0.30577	0.42131	0.24238	0.21674	0.22289	0.22657	0.28907	0.19703	0.26008				LAMC1	+	Ratio H/L AP_Ratio H/L AP_TA					45	45	45	38.2	38.2	38.2	164.63	0	323.31	157770000000	136010000000	21756000000	0.776536	0.0422278	-0.39743	-1.18327	0.186959	0.711059	-0.104166	-0.338752	0.996575	0.633571	0.106686	0.710249	0.23942	0.30577	0.22289	0.24305
NaN	0.30678	0.34877	0.56761	NaN	0.51359	NaN	NaN	0.36182	NaN	NaN	NaN				LRP2	+	Ratio H/L AP_Ratio H/L AP_TA					59	59	59	16.5	16.5	16.5	510.1	0	317.1	81316000000	78165000000	3151600000	1.59621	0.00414035	-0.723018	-3.32676	-4.34294e-08	1	0	0	-4.34294e-08	1	0	0	0.327775	0.5406	NaN	NaN
0.052276	0.061771	0.064321	0.13173	0.12917	0.11861	0.092328	0.086439	0.072292	0.088062	0.088726	0.08602				PODXL	+	Ratio H/L AP_Ratio H/L AP_TA			+	Ratio H/L AP_Ratio H/L BL	21	21	21	21.2	21.2	21.2	57.268	0	323.31	564880000000	527650000000	37228000000	3.35655	0	-1.0935	-5.39563	0.243835	0.763573	-0.0865095	-0.366298	1.61115	0.0367273	-0.491306	-2.05024	0.061771	0.12917	0.086439	0.088394
0.11927	0.10482	0.11492	0.21074	0.21109	0.19208	0.12978	0.12909	0.1194	0.13789	0.13628	0.13312				DDX17	+	Ratio H/L AP_Ratio H/L AP_TA					37	37	27	51.1	51.1	41	81.048	0	323.31	490040000000	458530000000	31510000000	3.56084	0	-0.857418	-5.00391	1.02019	0.4512	-0.12163	-0.807759	1.10618	0.393636	-0.159158	-0.949301	0.11492	0.21074	0.12909	0.137085
0.17891	0.18605	0.17803	0.22483	0.2125	0.20654	0.20899	0.20789	0.22428	0.19752	0.20307	0.22976				LSAMP	+	Ratio H/L AP_Ratio H/L AP_TA					23	23	23	55.7	55.7	55.7	31.656	0	323.31	479580000000	412580000000	67008000000	2.39771	0.0175072	-0.245225	-1.73659	0.829391	0.618538	0.0928638	0.627724	2.38093	0.0570667	-0.23917	-1.70082	0.17891	0.2125	0.20899	0.200295
0.26841	0.21978	0.2945	0.82215	0.88455	0.79309	NaN	0.40748	0.30323	0.36033	0.27293	0.34346				CDH17	+	Ratio H/L AP_Ratio H/L AP_TA					21	21	21	31	31	31	91.661	0	281.81	92005000000	67335000000	24670000000	3.6512	0	-1.68435	-7.23186	0.200479	0.77229	0.164646	0.419411	0.83449	0.215529	-0.440649	-1.3514	0.26841	0.82215	0.355355	0.31663
0.11409	0.11167	0.12687	0.20312	0.21898	0.18778	0.11389	0.11623	0.10454	0.1169	0.1214	0.11329				LSR	+	Ratio H/L AP_Ratio H/L AP_TA					23	23	23	37.1	37.1	37.1	66.213	0	323.31	420300000000	385000000000	35299000000	3.11403	0	-0.789803	-4.25392	0.641274	0.638571	-0.0962954	-0.587846	0.433811	0.804846	0.0746955	0.429963	0.11409	0.20312	0.11389	0.11915
0.79234	0.64202	0.77555	1.0226	1.1161	0.98316	0.61061	0.67682	0.69882	0.7398	0.67595	0.69644				GPC4	+	Ratio H/L AP_Ratio H/L AP_TA					7	7	6	16.9	16.9	13.8	62.432	0	33.769	26304000000	14910000000	11394000000	1.98117	0.00429091	-0.502678	-2.38738	0.445428	0.661875	-0.0973778	-0.51246	0.59394	0.637793	0.150004	0.704554	0.77555	1.0226	0.67682	0.707875
0.16002	0.15576	0.15355	0.27391	0.28559	0.25626	0.14062	0.15808	0.14282	0.15666	0.16104	0.14998				EPCAM	+	Ratio H/L AP_Ratio H/L AP_TA					31	31	31	47.8	47.8	47.8	35.357	0	323.31	2172200000000	1965600000000	206640000000	4.08484	0	-0.796323	-5.35318	0.68255	0.618367	-0.111976	-0.658899	0.739368	0.718051	0.0898769	0.577053	0.15576	0.27391	0.14282	0.15885
NaN	0.060301	0.059096	0.067636	0.066362	NaN	0.067522	0.061701	NaN	0.057085	0.064772	0.06718				SEC61A1	+	Ratio H/L AP_Ratio H/L AP_TA					11	11	11	28	28	28	51.867	0	323.31	137520000000	133220000000	4301800000	1.84963	0.0412821	-0.166453	-1.38706	0.282058	0.742247	0.0860847	0.406148	0.632887	0.640324	-0.112705	-0.676328	0.0596985	0.066999	0.0646115	0.0609285
0.35141	0.3344	0.33492	0.4233	0.44658	0.41981	0.38685	0.38769	0.36291	0.40916	0.42108	0.40805				F11R	+	Ratio H/L AP_Ratio H/L AP_TA					24	24	24	45.5	45.5	45.5	32.694	0	323.31	984190000000	732100000000	252090000000	3.1171	0.00223077	-0.337263	-2.47054	1.2524	0.407684	-0.131283	-0.916758	1.78781	0.2758	-0.155914	-1.12087	0.33492	0.4233	0.38685	0.41512
NaN	0.56342	0.82705	NaN	1.2123	1.3184	0.79377	0.98598	NaN	1.0836	0.85997	0.69918				GPC1	+	Ratio H/L AP_Ratio H/L AP_TA					3	3	3	9.6	9.6	9.6	55.996	0	11.215	11821000000	5855500000	5965500000	1.05377	0.0148824	-0.889103	-2.31888	0.195736	0.753526	-0.125884	-0.383065	0.44303	0.506308	-0.374047	-0.894828	0.695235	1.26535	0.889875	0.971785
0.32721	0.47757	0.34128	0.9063	0.89926	0.8235	0.39933	0.39154	0.4329	0.41986	0.61702	0.44416				ERBB4	+	Ratio H/L AP_Ratio H/L AP_TA					23	18	18	24.2	20.1	20.1	140.22	0	71.873	42593000000	30976000000	11618000000	2.6202	0	-1.21787	-4.37768	0.63414	0.360606	-0.320688	-1.01886	0.255647	0.788073	-0.11463	-0.41204	0.34128	0.89926	0.39933	0.51844
0.88619	0.92571	0.87477	1.8224	1.9462	2.0333	0.96304	0.94303	0.86374	1.0287	1.1603	1.0768				SPINT1	+	Ratio H/L AP_Ratio H/L AP_TA					17	17	17	35.6	35.6	35.6	56.377	0	256.59	104760000000	52359000000	52401000000	4.54058	0	-1.10968	-7.29417	1.14134	0.320952	-0.244423	-1.28858	0.325357	0.8332	-0.0428055	-0.277853	0.88619	1.9462	0.94303	1.0945
0.08814	0.086912	0.091657	0.32402	0.34155	0.31228	0.092473	0.097197	0.085211	0.094271	0.10446	0.09525				PTGFRN	+	Ratio H/L AP_Ratio H/L AP_TA					61	61	61	58	58	58	97.134	0	323.31	3110000000000	2839400000000	270600000000	5.74172	0	-1.87374	-13.0149	0.545058	0.609852	-0.117185	-0.615856	0.280781	0.840722	-0.0417955	-0.26136	0.08814	0.32402	0.092473	0.0993655
0.091682	0.074165	0.084467	0.1163	0.10868	0.13654	0.058139	0.065377	0.058459	0.074354	0.076373	0.072764				SLC3A2	+	Ratio H/L AP_Ratio H/L AP_TA			+	Ratio H/L AP_Ratio H/L BL	30	30	30	52.9	52.9	52.9	58.545	0	323.31	765770000000	734980000000	30790000000	1.7938	0.00613793	-0.529094	-2.27919	1.64593	0.1324	-0.315165	-1.82551	1.91842	0.0275556	0.456684	2.23039	0.084467	0.1163	0.058459	0.0753635
0.1762	0.17485	0.20002	0.41082	0.45738	0.41366	0.22777	0.20816	0.17843	0.1905	0.23183	0.20826				EPHB4	+	Ratio H/L AP_Ratio H/L AP_TA					36	34	30	42.6	40.6	35.5	108.5	0	323.31	201110000000	172810000000	28295000000	3.95744	0	-1.21896	-6.75727	0.0916135	0.843475	-0.0445529	-0.165243	0.560893	0.6452	-0.152384	-0.690919	0.1762	0.41366	0.20816	0.211165
0.13925	0.14277	0.14664	0.33228	0.37227	0.47536	0.13219	0.17123	0.14511	0.16231	0.16566	0.14501				SEMA4D	+	Ratio H/L AP_Ratio H/L AP_TA					29	29	29	34.8	34.8	34.8	107.91	0	323.31	216020000000	194220000000	21809000000	3.14384	0	-1.44471	-5.68937	0.408591	0.627368	-0.14159	-0.586651	0.198298	0.833127	-0.0573488	-0.271454	0.14277	0.37227	0.14511	0.163985
0.11808	0.10324	0.11854	0.27472	0.27889	0.27401	0.15486	0.16223	0.14345	0.17545	0.19281	0.18111				CD44	+	Ratio H/L AP_Ratio H/L AP_TA			+	Ratio H/L AP_Ratio H/L BL	12	12	12	35.5	35.5	35.5	39.52	0	248.11	509820000000	432730000000	77096000000	4.38888	0	-1.28692	-7.75149	1.28368	0.291	-0.262602	-1.42812	2.20461	0	-0.439471	-2.39486	0.11808	0.27472	0.15486	0.18413
0.091776	0.09779	0.093729	0.12668	0.10799	0.12261	0.12048	NaN	0.092287	0.088337	0.11684	0.087152				PTPRM	+	Ratio H/L AP_Ratio H/L AP_TA					40	40	40	34.2	34.2	34.2	161.39	0	323.31	201880000000	192710000000	9168700000	1.93613	0.0115692	-0.331883	-1.89403	0.0629653	0.856471	0.0536845	0.141762	0.445798	0.653371	-0.159658	-0.64512	0.093729	0.12261	0.106383	0.102588
0.15265	0.16277	0.15641	0.86062	0.94827	0.76569	0.15869	0.18798	0.17006	0.20305	0.20146	0.19104				CDCP1	+	Ratio H/L AP_Ratio H/L AP_TA					28	28	28	31.1	31.1	31.1	92.482	0	242.5	262360000000	225540000000	36828000000	4.90027	0	-2.44301	-12.6456	1.082	0.345565	-0.23522	-1.22718	0.778318	0.616889	-0.128146	-0.728528	0.15641	0.86062	0.17006	0.202255
0.13943	0.11063	0.11207	0.57279	0.57217	0.63153	0.12505	NaN	0.1074	0.13622	0.11108	0.18597				PVR	+	Ratio H/L AP_Ratio H/L AP_TA					7	7	7	25.4	25.4	25.4	43.704	0	128.04	92457000000	79202000000	13255000000	4.38776	0	-2.30121	-10.5495	0.163991	0.725689	-0.0860192	-0.303323	0.110296	0.8829	0.0504785	0.192681	0.11207	0.57279	0.116225	0.12365
0.24481	0.22511	0.21769	0.32253	0.45295	0.32267	0.25038	0.23954	0.2091	0.25085	0.28038	0.22427				DCBLD2	+	Ratio H/L AP_Ratio H/L AP_TA					19	19	19	31	31	31	80.441	0	182.67	108510000000	89072000000	19443000000	1.7386	0.00445283	-0.658092	-2.43018	0.694059	0.430732	-0.190911	-0.878318	0.0810103	0.925773	-0.0213371	-0.110541	0.22511	0.32267	0.23954	0.265615
NaN	0.22617	0.22318	0.45891	0.64124	0.3183	0.20028	0.39445	0.20347	0.20823	0.27681	0.24293				PTPRG	+	Ratio H/L AP_Ratio H/L AP_TA					24	24	24	24.1	24.1	24.1	154.7	0	249.2	78922000000	70629000000	8292500000	1.13012	0.00996825	-1.01535	-2.12961	0.054902	0.850136	0.072022	0.132579	0.14642	0.839508	-0.167751	-0.32508	0.224675	0.45891	0.20347	0.24252
0.10102	0.1001	0.10091	0.14844	0.14833	0.13459	0.10334	0.11352	0.096121	0.10358	0.12177	0.11255				IGF1R	+	Ratio H/L AP_Ratio H/L AP_TA					79	79	79	47.5	47.5	47.5	154.89	0	323.31	1853100000000	1698400000000	154790000000	3.39292	0	-0.512703	-3.48517	0.352002	0.694831	-0.109696	-0.487639	0.277321	0.83687	-0.048039	-0.283238	0.10091	0.14833	0.10334	0.112675
0.51544	0.52493	0.51053	0.82724	0.87039	0.81752	0.57319	0.60342	0.53447	0.54957	0.59371	0.56604				TMPRSS11E	+	Ratio H/L AP_Ratio H/L AP_TA					25	25	25	54.5	54.5	54.5	47.761	0	323.31	355390000000	224570000000	130820000000	4.68449	0	-0.697099	-5.357	0.0165027	0.925809	-0.00393591	-0.0221675	1.26262	0.383	-0.14012	-0.921371	0.51544	0.82724	0.57319	0.57164
0.37523	0.29767	0.3421	0.45138	0.48541	0.40911	0.36151	0.39443	0.30552	0.32844	0.38912	0.31132				SLIT3	+	Ratio H/L AP_Ratio H/L AP_TA					40	40	40	35.7	35.7	35.7	145.16	0	323.31	135580000000	107440000000	28139000000	1.56459	0.0113939	-0.410043	-1.85905	0.0460137	0.884453	-0.0228986	-0.0858455	0.163191	0.838301	-0.0630548	-0.257015	0.3421	0.45138	0.36151	0.35878
0.054077	0.060651	0.062358	0.088978	0.075472	0.066981	0.076135	0.08441	0.081411	NaN	0.069007	0.037028				MUC1	+	Ratio H/L AP_Ratio H/L AP_TA			+	Ratio H/L AP_Ratio H/L BL	13	13	13	32	32	32	30.934	0	318.43	404280000000	385380000000	18902000000	1.32027	0.0237714	-0.379007	-1.61689	-4.34294e-08	1	0	0	2.38433	0	-0.451692	-2.55843	0.060651	0.075472	0.081411	NaN
0.081586	0.061199	0.11297	0.24964	0.18608	0.20935	0.066791	0.089009	0.064689	0.045437	0.059676	0.07827				ITGA3	+	Ratio H/L AP_Ratio H/L AP_TA					24	24	24	25.2	25.2	25.2	116.73	0	323.31	275880000000	264540000000	11339000000	2.07197	0	-1.36926	-3.56949	0.862171	0.258667	0.481866	1.42073	0.24756	0.800596	0.184191	0.466979	0.081586	0.20935	0.066791	0.0525565
0.33306	0.28848	0.28803	1.1211	1.0962	1.0844	0.30753	0.32658	0.29546	0.41855	0.45377	0.42978				EPHA2	+	Ratio H/L AP_Ratio H/L AP_TA	+	Ratio H/L BL_Ratio H/L BL_TA			42	42	39	44.3	44.3	41.1	108.26	0	323.31	545370000000	353060000000	192310000000	4.90434	0	-1.86321	-10.9019	2.24082	0	-0.493305	-2.91103	0.154535	0.877926	-0.0335512	-0.18518	0.28848	1.0962	0.30753	0.43616
0.15004	0.13027	0.15486	0.27601	0.24966	0.25073	0.1476	0.15811	0.15552	0.17522	0.20676	0.1822				SLITRK4	+	Ratio H/L AP_Ratio H/L AP_TA					36	36	36	47.5	47.5	47.5	94.503	0	323.31	375020000000	331270000000	43745000000	3.12837	0	-0.837668	-4.40691	1.3008	0.215077	-0.308655	-1.56672	0.457579	0.808	-0.0873017	-0.47885	0.15004	0.25073	0.15552	0.19099
0.04131	0.038331	0.039227	0.050983	0.050799	0.046934	0.039586	0.042762	0.037247	0.043774	0.045998	0.04481				LGALS3	+	Ratio H/L AP_Ratio H/L AP_TA					25	25	24	38.9	38.9	38.9	30.33	0	323.31	2600200000000	2527200000000	72999000000	2.51685	0.0072	-0.322867	-2.14724	0.934155	0.389943	-0.173008	-0.966322	0.0370295	0.959747	-0.00719786	-0.0433898	0.039227	0.050799	0.039586	0.044886
0.068235	0.047871	0.057358	0.070095	0.074065	0.3505	0.039629	0.073564	0.065217	0.068435	0.082434	0.064458				HLA-DRB1	+	Ratio H/L AP_Ratio H/L AP_TA					8	8	1	31.6	31.6	3.8	27.15	0	323.31	273900000000	259050000000	14854000000	0.635796	0.0362078	-1.09326	-1.24902	0.431413	0.458364	-0.385385	-0.825981	0.00745685	0.983625	-0.00704861	-0.0171705	0.057358	0.074065	0.065217	0.0754345
0.18115	0.18281	0.20056	0.45036	0.60776	0.41815	0.18441	0.19078	0.19251	0.19261	0.14423	0.19578				HSPG2	+	Ratio H/L AP_Ratio H/L AP_TA					89	89	19	28.2	28.2	5.8	467.85	0	323.31	349600000000	306450000000	43144000000	2.87504	0	-1.36901	-5.04336	0.482347	0.5515	0.182893	0.710482	0.0646976	0.945161	-0.00939878	-0.0624226	0.18281	0.45036	0.19078	0.16842
0.55565	0.81133	0.53931	2.5948	2.5	2.4097	0.55029	0.58757	0.5523	0.65524	0.80812	0.7093				SDC4	+	Ratio H/L AP_Ratio H/L AP_TA					9	9	9	39.1	39.1	39.1	21.94	0	170.6	116450000000	64585000000	51862000000	3.31987	0	-2.0022	-6.85426	1.27147	0.166545	-0.369828	-1.6848	0.316126	0.765778	0.148392	0.508036	0.55565	2.5	0.5523	0.73168
0.31504	0.30426	0.30375	0.40147	0.42022	0.37723	0.31845	0.32418	0.30476	0.3002	0.3181	0.30996				BCAM	+	Ratio H/L AP_Ratio H/L AP_TA					32	32	32	56.1	56.1	56.1	67.747	0	323.31	2080300000000	1596200000000	484050000000	2.83414	0.00227451	-0.376052	-2.53614	0.257345	0.820468	0.0308097	0.210674	0.51856	0.849176	-0.0372705	-0.283305	0.30426	0.40147	0.31845	0.30915
0.20517	0.21005	0.22052	0.75098	0.80597	0.70262	0.21476	0.23418	0.22489	0.24671	0.28421	0.25267				MET	+	Ratio H/L AP_Ratio H/L AP_TA					58	58	57	42.4	42.4	41.8	154.64	0	323.31	641960000000	504780000000	137180000000	5.02542	0	-1.82793	-11.0878	1.12175	0.334182	-0.238366	-1.25983	0.818779	0.705854	-0.0837002	-0.568075	0.21005	0.75098	0.22489	0.26546
0.25221	0.24194	0.24617	0.19082	0.20447	0.19936	0.26286	0.26777	0.25355	0.24366	0.27832	0.24058				ATP1B1	+	Ratio H/L AP_Ratio H/L AP_TA					25	25	6	52.8	52.8	10.2	35.239	0	323.31	1344200000000	1137800000000	206410000000	3.13425	0.00421429	0.316484	2.36333	0.0212842	0.92386	0.00504599	0.0284307	1.34009	0.660848	-0.0828764	-0.642815	0.24617	0.19936	0.26286	0.26099
0.33237	0.28297	0.31674	0.23034	0.24515	NaN	0.6376	0.66788	0.63559	0.53911	0.69066	0.57626				CLDN2	+	Ratio H/L AP_Ratio H/L AP_TA			+	Ratio H/L AP_Ratio H/L BL	6	6	6	23.5	23.5	23.5	24.502	0	166.99	82766000000	54789000000	27977000000	1.56425	0.0151045	0.383531	1.96768	0.235744	0.71039	0.084168	0.355899	3.89551	0	-1.0612	-6.14951	0.31674	0.237745	0.6376	0.614885
0.54282	0.38825	0.34181	NaN	0.85017	0.94558	0.42062	0.44253	NaN	0.59073	NaN	NaN				COL17A1 BP180 BPAG2	+	Ratio H/L AP_Ratio H/L AP_TA					7	7	7	5.4	5.4	5.4	163.07	0	37.622	12840000000	8974900000	3864700000	1.61077	0	-1.10759	-3.04959	-4.34294e-08	1	0	0	0.0692382	0.917619	-0.0522616	-0.145839	0.38825	0.897875	0.431575	NaN
NaN	NaN	NaN	1.2502	1.1678	1.3445	NaN	0.56422	0.49476	0.66666	0.78504	0.66767				SLC20A1							4	4	4	7.3	7.3	7.3	74.602	0	63.207	3780100000	1915000000	1865100000	-4.34294e-08	1	0	0	1.01942	0.220333	-0.453365	-1.8043	-4.34294e-08	1	0	0	NaN	1.2502	0.52949	0.72585
NaN	NaN	NaN	0.84535	0.74079	0.82797	NaN	NaN	NaN	NaN	NaN	NaN				OSMR							9	9	9	14.6	14.6	14.6	108.98	0	156.36	13923000000	8726000000	5197200000	-4.34294e-08	1	0	0	-4.34294e-08	1	0	0	-4.34294e-08	1	0	0	NaN	0.82797	NaN	NaN
0.19751	NaN	NaN	0.94719	0.93921	0.99188	0.2585	0.23987	0.29283	0.23555	0.26006	0.23323				PCDH1							18	18	18	17.4	17.4	17.4	132.95	0	177.05	99719000000	81878000000	17840000000	-4.34294e-08	1	0	0	0.280272	0.763886	0.0867212	0.392871	-4.34294e-08	1	0	0	NaN	0.94719	0.2585	0.247805
NaN	NaN	NaN	0.6013	NaN	0.66053	NaN	NaN	NaN	NaN	NaN	NaN				TINAGL1							8	8	8	22.9	22.9	22.9	52.315	0	35.413	10800000000	9891200000	908460000	-4.34294e-08	1	0	0	-4.34294e-08	1	0	0	-4.34294e-08	1	0	0	NaN	0.630915	NaN	NaN
NaN	NaN	NaN	0.28778	0.34235	NaN	NaN	0.13188	0.2346	NaN	NaN	NaN				SSR4							5	5	5	36.4	36.4	36.4	18.943	0	69.412	48604000000	45769000000	2834900000	-4.34294e-08	1	0	0	-4.34294e-08	1	0	0	-4.34294e-08	1	0	0	NaN	0.315065	0.18324	NaN
NaN	0.47431	NaN	NaN	NaN	NaN	NaN	0.61521	0.40402	0.4657	NaN	0.58148				TSPAN14							3	3	3	14.1	14.1	14.1	30.631	0	45.547	14410000000	8484600000	5925600000	-4.34294e-08	1	0	0	-4.34294e-08	1	0	0	-4.34294e-08	1	0	0	NaN	NaN	0.509615	NaN
NaN	NaN	0.13915	NaN	NaN	NaN	0.096446	0.089752	0.080831	0.079628	0.074314	0.078898				M6PR							12	12	12	29.5	29.5	29.5	43.246	0	265.77	166030000000	157780000000	8243900000	-4.34294e-08	1	0	0	0.863326	0.371875	0.206737	1.02107	-4.34294e-08	1	0	0	NaN	NaN	0.089752	0.076971
NaN	0.061971	0.077866	NaN	NaN	0.15169	NaN	NaN	NaN	NaN	NaN	NaN				OXNAD1							1	1	1	3.8	3.8	3.8	34.805	0.0021174	2.3383	58700000000	53630000000	5069900000	-4.34294e-08	1	0	0	-4.34294e-08	1	0	0	-4.34294e-08	1	0	0	0.0699185	NaN	NaN	NaN
0.17195	0.15986	0.16119	0.15961	0.1489	0.12797	0.15137	0.17933	0.1572	0.17219	0.16207	0.12464				ADAM9							26	26	26	41.7	41.7	41.7	72.143	0	323.31	248030000000	221430000000	26596000000	0.841546	0.0877108	0.180953	0.905653	0.15357	0.827312	-0.0425436	-0.211582	0.0784688	0.918667	0.0180877	0.0998044	0.16119	0.1489	0.1572	0.16713
0.4114	NaN	NaN	NaN	NaN	NaN	0.14956	0.13326	0.13222	0.18657	0.19332	0.18643				EPHA1			+	Ratio H/L BL_Ratio H/L BL_TA			28	28	28	34.3	34.3	34.3	107.48	0	282.22	115460000000	106460000000	8999400000	-4.34294e-08	1	0	0	2.03198	0	-0.459385	-2.60105	-4.34294e-08	1	0	0	NaN	NaN	0.13326	0.189945
NaN	0.25414	NaN	NaN	NaN	0.37045	0.17726	0.18007	0.17143	0.16096	0.18925	0.18191				CA14							6	6	6	25	25	25	37.472	0	99.089	65854000000	58356000000	7497800000	-4.34294e-08	1	0	0	0.0511643	0.900411	0.0138503	0.0724592	-4.34294e-08	1	0	0	NaN	NaN	0.17726	0.175105
NaN	NaN	NaN	NaN	NaN	NaN	NaN	0.29913	0.73492	0.81959	1.096	NaN				PTPRS							14	6	6	11	5.8	5.8	210.52	0	61.527	6802000000	4881700000	1920300000	-4.34294e-08	1	0	0	0.561156	0.33808	-1.01536	-1.29932	-4.34294e-08	1	0	0	NaN	NaN	0.517025	0.957795
NaN	0.034248	0.036002	0.035609	0.035349	0.040594	0.038024	0.029261	0.02744	0.030058	0.033124	0.028714				VDAC2							18	18	17	66	66	66	31.578	0	323.31	594760000000	585220000000	9541500000	0.364941	0.663913	-0.0796775	-0.424013	0.0233434	0.899714	-0.0137564	-0.0469468	0.359671	0.7235	0.167992	0.583808	0.035125	0.035609	0.029261	0.031591
0.10633	0.13147	0.14147	NaN	NaN	NaN	0.11387	0.13902	0.12172	0.15563	0.15477	0.1313				SLC44A1							19	19	19	26.2	26.2	26.2	73.204	0	259.84	130020000000	116850000000	13173000000	-4.34294e-08	1	0	0	1.20982	0.210857	-0.318708	-1.52282	0.0280638	0.962426	0.0125106	0.0500969	0.13147	NaN	0.12172	0.1552
NaN	NaN	NaN	2.3583	2.317	2.0885	NaN	NaN	NaN	NaN	NaN	NaN				CYR61							18	18	18	49.3	49.3	49.3	41.769	0	96.402	67686000000	20182000000	47503000000	-4.34294e-08	1	0	0	-4.34294e-08	1	0	0	-4.34294e-08	1	0	0	NaN	2.317	NaN	NaN
0.28052	0.20326	0.18905	0.25208	0.20789	0.25871	0.20696	0.22312	0.20992	0.20211	0.21717	0.21893				FLRT2							23	23	23	38	38	38	73.834	0	323.31	209340000000	183030000000	26305000000	0.212588	0.708723	-0.11028	-0.366018	0.160861	0.8384	0.0253543	0.160698	0.10315	0.87239	0.0510621	0.183604	0.20326	0.25208	0.20992	0.20964
NaN	NaN	NaN	NaN	0.07085	NaN	NaN	0.078825	0.052517	NaN	NaN	0.072746				SYPL1							5	5	5	28.9	28.9	28.9	24.518	0	116.01	64191000000	62489000000	1702200000	-4.34294e-08	1	0	0	-4.34294e-08	1	0	0	-4.34294e-08	1	0	0	NaN	NaN	0.065671	NaN
0.045755	NaN	0.058147	0.042221	NaN	NaN	0.059957	0.049498	0.042575	0.048815	0.079426	0.06359				HMGCL							14	14	14	44.3	44.3	44.3	34.219	0	267.4	142720000000	138570000000	4144500000	-4.34294e-08	1	0	0	0.395121	0.541565	-0.311366	-0.740945	0.0598986	0.91908	0.0397154	0.12218	0.051951	NaN	0.049498	0.0641205
NaN	NaN	NaN	NaN	NaN	NaN	NaN	NaN	0.35319	0.6523	NaN	0.93624				GFRA1							7	7	7	19.2	19.2	19.2	51.81	0	66.9	10571000000	6747800000	3822800000	-4.34294e-08	1	0	0	-4.34294e-08	1	0	0	-4.34294e-08	1	0	0	NaN	NaN	NaN	NaN
NaN	NaN	NaN	1.5783	1.6458	1.56	NaN	NaN	NaN	NaN	NaN	NaN				PLAUR							4	4	4	25.2	25.2	25.2	26.025	0	162.53	34073000000	14252000000	19821000000	-4.34294e-08	1	0	0	-4.34294e-08	1	0	0	-4.34294e-08	1	0	0	NaN	1.5783	NaN	NaN
0.048265	0.041927	0.049034	0.05468	0.050023	0.043634	0.042239	0.041743	0.044377	0.056529	0.053066	0.047059				SERPINH1			+	Ratio H/L BL_Ratio H/L BL_TA			25	25	25	59.3	59.3	59.3	46.582	0	323.31	903300000000	879650000000	23644000000	0.304187	0.665505	-0.0888062	-0.405833	2.27892	0	-0.356749	-2.3988	0.676269	0.674375	0.114239	0.646426	0.048265	0.050023	0.042239	0.0547975
NaN	NaN	NaN	NaN	NaN	NaN	NaN	0.60338	NaN	0.43665	NaN	0.51904				ACVR1							4	4	4	10	10	10	52.857	0	11.073	7149400000	4906800000	2242600000	-4.34294e-08	1	0	0	-4.34294e-08	1	0	0	-4.34294e-08	1	0	0	NaN	NaN	NaN	NaN
NaN	0.74315	NaN	0.52002	NaN	0.52485	1.2378	NaN	0.90611	1.033	NaN	0.70116				HPN							4	4	4	10.8	10.8	10.8	44.904	0	18.794	13394000000	7609600000	5784200000	-4.34294e-08	1	0	0	-4.34294e-08	1	0	0	-4.34294e-08	1	0	0	NaN	0.522435	1.07195	NaN
NaN	NaN	NaN	NaN	NaN	NaN	NaN	1.0983	NaN	1.1595	1.2694	NaN				B2M							3	3	3	18.4	18.4	18.4	14.263	0	12.465	44539000000	22022000000	22516000000	-4.34294e-08	1	0	0	-4.34294e-08	1	0	0	-4.34294e-08	1	0	0	NaN	NaN	NaN	1.21445
NaN	NaN	NaN	0.56452	NaN	0.43957	NaN	NaN	NaN	NaN	NaN	NaN				CLDN4							4	4	3	22.4	22.4	14.8	22.091	0	52.455	13340000000	12357000000	983870000	-4.34294e-08	1	0	0	-4.34294e-08	1	0	0	-4.34294e-08	1	0	0	NaN	0.502045	NaN	NaN
NaN	NaN	NaN	1.1759	1.3913	NaN	NaN	NaN	NaN	NaN	NaN	NaN				IGFBP7							3	3	3	14.9	14.9	14.9	28.899	0	7.5229	6103900000	1614100000	4489700000	-4.34294e-08	1	0	0	-4.34294e-08	1	0	0	-4.34294e-08	1	0	0	NaN	1.2836	NaN	NaN
NaN	NaN	NaN	0.93927	1.2669	0.86003	NaN	NaN	NaN	NaN	NaN	NaN				LAMA3							33	33	32	12.2	12.2	11.8	367.68	0	181.66	25726000000	16644000000	9081700000	-4.34294e-08	1	0	0	-4.34294e-08	1	0	0	-4.34294e-08	1	0	0	NaN	0.93927	NaN	NaN
0.082508	0.065854	0.062012	0.059591	0.071927	0.061651	0.062905	0.076219	0.089997	0.078213	0.074704	0.064068				RPN1							36	36	36	64.7	64.7	64.7	68.576	0	323.31	520590000000	491750000000	28839000000	0.317631	0.606337	0.116867	0.466227	0.0280567	0.913138	-0.0165627	-0.0562777	0.240519	0.792929	-0.11895	-0.403266	0.065854	0.061651	0.076219	0.0764585
NaN	NaN	NaN	NaN	NaN	NaN	0.63952	0.57339	0.56858	0.49177	0.72446	0.48762				VASN							10	10	10	17.9	17.9	17.9	71.469	0	117.42	34926000000	26974000000	7952700000	-4.34294e-08	1	0	0	0.0139917	0.923681	-0.00948838	-0.0296592	-4.34294e-08	1	0	0	NaN	NaN	0.57339	0.608115
NaN	NaN	NaN	NaN	NaN	NaN	0.37671	NaN	0.65615	0.50176	NaN	0.68407				FRRS1							4	4	4	6.6	6.6	6.6	65.786	0	6.7599	6383700000	4653100000	1730700000	-4.34294e-08	1	0	0	-4.34294e-08	1	0	0	-4.34294e-08	1	0	0	NaN	NaN	0.51643	NaN
0.067906	NaN	0.036083	NaN	0.075185	NaN	NaN	NaN	0.2867	0.034156	0.085914	NaN				HSP90B1							44	44	42	49.4	49.4	47.7	92.384	0	323.31	403920000000	396810000000	7109300000	-4.34294e-08	1	0	0	-4.34294e-08	1	0	0	-4.34294e-08	1	0	0	0.0519945	NaN	NaN	0.060035
NaN	NaN	NaN	2.5895	2.4668	2.187	NaN	NaN	NaN	NaN	NaN	NaN				SEMA7A							12	12	12	28.2	28.2	28.2	63.666	0	86.054	32258000000	9789100000	22469000000	-4.34294e-08	1	0	0	-4.34294e-08	1	0	0	-4.34294e-08	1	0	0	NaN	2.4668	NaN	NaN
NaN	NaN	NaN	NaN	NaN	NaN	1.7633	2.2055	2.325	2.0171	NaN	1.9076				SPINT2							5	5	5	29	29	29	28.053	0	177.01	25221000000	7479000000	17742000000	-4.34294e-08	1	0	0	-4.34294e-08	1	0	0	-4.34294e-08	1	0	0	NaN	NaN	2.2055	NaN
NaN	NaN	NaN	NaN	NaN	NaN	NaN	NaN	NaN	0.41206	0.51957	NaN				TTYH3							3	3	3	7.9	7.9	7.9	56.861	0	42.49	7284700000	5416000000	1868700000	-4.34294e-08	1	0	0	-4.34294e-08	1	0	0	-4.34294e-08	1	0	0	NaN	NaN	NaN	0.465815
0.15618	0.1494	0.15781	0.1588	0.16571	0.1507	0.14942	0.1707	0.14969	0.1483	0.16725	0.15423				PLXNB2							82	82	81	44.5	44.5	44.5	205.04	0	323.31	2827400000000	2491300000000	336050000000	0.31393	0.821875	-0.0356575	-0.243504	0.0348557	0.908545	-0.0109912	-0.0537445	0.091142	0.922337	-0.0174119	-0.103606	0.15618	0.1588	0.14969	0.157775
NaN	0.2947	NaN	NaN	NaN	0.27159	NaN	0.049709	NaN	0.091586	0.11596	0.14266				SLC12A2							28	28	28	30.5	30.5	30.5	110.53	0	323.31	177320000000	172730000000	4582600000	-4.34294e-08	1	0	0	-4.34294e-08	1	0	0	-4.34294e-08	1	0	0	NaN	NaN	NaN	0.103773
0.71744	NaN	NaN	NaN	NaN	NaN	1.0592	0.82935	1.0075	1.166	1.3654	1.0343				CDH3							5	5	5	8.6	8.6	8.6	91.153	0	36.244	14481000000	7141500000	7339300000	-4.34294e-08	1	0	0	1.02634	0.2312	-0.394176	-1.49968	-4.34294e-08	1	0	0	NaN	NaN	1.0075	1.2657
0.033886	0.02962	0.031948	NaN	NaN	NaN	NaN	NaN	NaN	NaN	NaN	NaN				SLC39A4							11	11	11	22.8	22.8	22.8	62.716	0	285.01	60682000000	58980000000	1702500000	-4.34294e-08	1	0	0	-4.34294e-08	1	0	0	-4.34294e-08	1	0	0	0.031948	NaN	NaN	NaN
NaN	0.12442	0.19814	NaN	0.17373	0.20955	0.1159	0.1436	0.15657	0.14241	NaN	0.13509				LAMB1							48	48	48	36.1	36.1	36.1	181.93	0	323.31	129750000000	123820000000	5931100000	0.285311	0.485364	-0.281201	-0.608838	-4.34294e-08	1	0	0	0.242917	0.770041	0.190288	0.475095	0.16128	0.19164	0.1436	NaN
NaN	NaN	NaN	NaN	NaN	NaN	NaN	0.040751	0.049747	NaN	NaN	0.043688				SLC16A1							20	20	20	26.9	26.9	26.9	53.747	0	323.31	103050000000	101920000000	1133800000	-4.34294e-08	1	0	0	-4.34294e-08	1	0	0	-4.34294e-08	1	0	0	NaN	NaN	0.045249	NaN
0.088319	0.15014	NaN	0.1075	0.19509	NaN	0.10977	0.10345	0.090907	0.1133	0.23122	0.10249				CD276							7	7	7	29.1	29.1	29.1	57.05	0	216.54	88332000000	81544000000	6788600000	0.20507	0.618356	-0.330686	-0.489469	0.731009	0.287158	-0.679414	-1.36622	0.237285	0.76832	0.188258	0.466513	0.119229	0.151295	0.10345	0.17226
0.311	0.30462	NaN	NaN	NaN	NaN	0.15706	NaN	0.10658	0.13404	0.18841	0.14321				ST14					+	Ratio H/L AP_Ratio H/L BL	15	15	15	22.9	22.9	22.9	92.141	0	124.23	61792000000	56784000000	5008200000	-4.34294e-08	1	0	0	0.293235	0.632655	-0.296643	-0.628187	1.33074	0	1.25034	3.28959	0.30781	NaN	0.13182	0.161225
NaN	0.78521	NaN	0.72386	0.90481	0.84955	0.35613	0.361	0.22484	0.54879	0.3235	0.38072				LAMB3							24	24	24	27.6	27.6	27.6	129.32	0	323.31	56351000000	39602000000	16749000000	-4.34294e-08	1	0	0	0.466065	0.412513	-0.457243	-0.903824	-4.34294e-08	1	0	0	NaN	0.84955	0.35613	0.436145
NaN	NaN	NaN	0.5133	0.62636	0.56331	NaN	NaN	NaN	NaN	NaN	NaN				LAMC2							21	21	21	25.6	25.6	25.6	131.07	0	323.31	49307000000	41507000000	7800400000	-4.34294e-08	1	0	0	-4.34294e-08	1	0	0	-4.34294e-08	1	0	0	NaN	0.56331	NaN	NaN
NaN	0.61413	NaN	1.2075	0.95854	NaN	0.4878	0.61883	0.59154	0.57271	0.56237	0.58512				DDR1							15	15	15	19.4	19.4	19.4	101.82	0	102.96	38949000000	24791000000	14159000000	-4.34294e-08	1	0	0	0.0270929	0.90782	-0.011226	-0.0475182	-4.34294e-08	1	0	0	NaN	1.08302	0.59154	0.56754
0.20775	0.23768	NaN	NaN	NaN	NaN	NaN	0.44246	NaN	NaN	NaN	NaN				IGSF9							6	6	6	6	6	6	126.66	0	207.62	7713800000	6548800000	1165000000	-4.34294e-08	1	0	0	-4.34294e-08	1	0	0	-4.34294e-08	1	0	0	0.222715	NaN	NaN	NaN
NaN	NaN	0.16378	0.33949	0.27567	0.32302	NaN	0.22043	0.15456	0.18618	0.29048	NaN				PLXNA2							33	33	27	22.8	22.8	19	220.57	0	310.78	51956000000	48937000000	3019500000	-4.34294e-08	1	0	0	0.299213	0.621358	-0.333325	-0.652902	-4.34294e-08	1	0	0	NaN	0.32302	0.187495	0.23833
0.12867	0.12346	0.13599	0.11151	0.11948	0.11741	0.13339	0.13836	0.12658	0.12465	0.14615	0.12755				ERBB2							43	43	38	37	37	33.4	138.18	0	323.31	1306300000000	1173200000000	133040000000	1.43638	0.0603457	0.155241	1.03317	0.0871931	0.848308	-0.024624	-0.124272	0.274861	0.849027	-0.0376355	-0.242883	0.12867	0.11741	0.13339	0.1354
NaN	0.42293	0.46367	NaN	NaN	NaN	0.45452	0.44502	0.43055	0.42303	0.51651	0.41462				PCDH7							8	8	8	11	11	11	102.67	0	144.99	33283000000	23735000000	9547800000	-4.34294e-08	1	0	0	0.267218	0.7201	-0.0766465	-0.362757	0.0076886	0.982928	-0.00137297	-0.00871682	0.4433	NaN	0.44502	0.46977
NaN	NaN	NaN	NaN	NaN	NaN	NaN	0.088787	0.058147	0.12359	0.059237	0.12284				CNNM4							23	23	20	36.9	36.9	32.8	86.577	0	277.17	89878000000	88288000000	1590000000	-4.34294e-08	1	0	0	0.142357	0.702791	-0.251968	-0.353845	-4.34294e-08	1	0	0	NaN	NaN	0.073467	0.0914135
NaN	0.070673	NaN	0.067471	NaN	NaN	0.066598	NaN	0.06719	NaN	NaN	NaN				STT3A							13	13	13	18	18	18	89.552	0	53.102	51140000000	49920000000	1219800000	-4.34294e-08	1	0	0	-4.34294e-08	1	0	0	-4.34294e-08	1	0	0	NaN	NaN	0.066894	NaN
0.056508	0.065514	0.058495	0.065092	0.066298	0.065967	0.05995	0.062814	0.065211	0.065867	0.062461	0.062574				CD109							66	66	66	46.9	46.9	46.9	162.23	0	323.31	825500000000	800640000000	24859000000	0.948109	0.147674	-0.13154	-0.797608	0.24852	0.814989	-0.0346019	-0.225333	0.340823	0.847607	-0.0604632	-0.348741	0.058495	0.065967	0.062814	0.064164
NaN	0.86893	NaN	1.9517	1.7944	1.8713	0.66984	0.59773	0.65141	0.90639	0.88915	0.99176				LDLR			+	Ratio H/L BL_Ratio H/L BL_TA			13	13	13	20.7	20.7	20.7	95.137	0	70.036	42364000000	18758000000	23606000000	-4.34294e-08	1	0	0	2.32327	0	-0.490654	-2.97963	-4.34294e-08	1	0	0	NaN	1.8713	0.65141	0.89777
0.078322	0.06983	0.068536	0.083624	0.06776	0.08039	0.070372	0.072579	0.067702	0.075363	0.08789	0.069986				ITGA1							39	39	39	27.1	27.1	27.1	130.51	0	323.31	901080000000	853910000000	47177000000	0.35114	0.625055	-0.0937467	-0.444517	0.99958	0.352593	-0.213527	-1.11927	0.227141	0.853211	0.0387915	0.232523	0.06983	0.08039	0.070372	0.0816265
1.1529	NaN	NaN	NaN	1.7052	NaN	1.1194	1.2569	1.1503	1.0953	1.4345	1.1268				FGFR2							10	10	8	13.6	13.6	11.3	92.094	0	18.125	26004000000	11995000000	14010000000	-4.34294e-08	1	0	0	0.22584	0.729215	-0.0944017	-0.364471	-4.34294e-08	1	0	0	NaN	NaN	1.1503	1.2649
0.34717	NaN	NaN	0.65805	NaN	0.42214	0.31145	0.30264	0.29623	0.32943	0.27463	0.35024				NOTCH2							22	22	22	13.4	13.4	13.4	247.61	0	104.64	47650000000	38993000000	8657400000	-4.34294e-08	1	0	0	0.0406486	0.907926	0.0123763	0.0614247	-4.34294e-08	1	0	0	NaN	0.540095	0.30264	0.30203
NaN	NaN	NaN	1.9956	2.4154	2.8603	NaN	NaN	NaN	NaN	NaN	NaN				PLAU							2	2	2	6.1	6.1	6.1	59.444	0	46.282	4219800000	1039800000	3180000000	-4.34294e-08	1	0	0	-4.34294e-08	1	0	0	-4.34294e-08	1	0	0	NaN	2.4154	NaN	NaN
0.016302	NaN	NaN	0.020023	NaN	0.025799	0.016565	0.018729	0.023332	0.015274	0.020741	NaN				PCCB							32	32	32	65.9	65.9	65.9	59.976	0	323.31	998640000000	993180000000	5454400000	-4.34294e-08	1	0	0	0.178995	0.70981	0.120126	0.34443	-4.34294e-08	1	0	0	NaN	0.022911	0.018729	0.0180075
0.80299	0.67399	0.8687	NaN	NaN	NaN	0.86507	0.91413	0.79431	0.85988	1.0495	0.88754				ERBB3							18	18	18	23.8	23.8	23.8	113.26	0	95.434	26908000000	13470000000	13437000000	-4.34294e-08	1	0	0	0.471402	0.604471	-0.149577	-0.646316	0.4929	0.648	-0.139317	-0.624097	0.80299	NaN	0.86507	0.95469
0.17458	0.0664	NaN	0.21357	NaN	NaN	NaN	NaN	NaN	NaN	NaN	NaN				DNASE1L1							13	13	13	47.5	47.5	47.5	33.36	0	145.31	73406000000	70039000000	3367000000	-4.34294e-08	1	0	0	-4.34294e-08	1	0	0	-4.34294e-08	1	0	0	0.12049	NaN	NaN	NaN
NaN	0.25931	NaN	0.69148	NaN	0.68042	0.62926	0.3327	NaN	0.33217	0.2843	NaN				MMP14							16	16	16	33.3	33.3	33.3	65.852	0	213.34	43226000000	37817000000	5409500000	-4.34294e-08	1	0	0	0.457433	0.404111	0.574271	1.00183	-4.34294e-08	1	0	0	NaN	0.68595	0.48098	0.308235
0.72986	0.80829	0.7108	0.77831	0.71722	0.87235	0.62162	0.81091	0.72473	0.71387	0.58662	0.73431				AGRN							49	49	49	33.9	33.9	33.9	216.6	0	323.31	186400000000	116450000000	69951000000	0.292453	0.707747	-0.0719104	-0.360398	0.319603	0.678	0.143629	0.516398	0.205459	0.844716	0.066306	0.295087	0.72986	0.77831	0.72473	0.650245
NaN	NaN	NaN	NaN	NaN	1.0085	0.46482	NaN	0.40144	NaN	0.61289	NaN				CA12							3	3	3	13.6	13.6	13.6	34.894	0	27.089	16408000000	11642000000	4765600000	-4.34294e-08	1	0	0	-4.34294e-08	1	0	0	-4.34294e-08	1	0	0	NaN	NaN	0.43313	NaN
NaN	NaN	NaN	1.969	2.5113	1.641	NaN	NaN	NaN	NaN	NaN	NaN				timp3 TIMP3							5	5	5	28.4	28.4	28.4	24.153	0	11.549	8313600000	2593000000	5720600000	-4.34294e-08	1	0	0	-4.34294e-08	1	0	0	-4.34294e-08	1	0	0	NaN	1.969	NaN	NaN
NaN	NaN	NaN	0.11596	NaN	0.13182	NaN	0.10659	0.099185	0.10128	NaN	NaN				TF							15	15	15	14.5	14.5	14.5	110.51	0	310.13	89590000000	84994000000	4596000000	-4.34294e-08	1	0	0	-4.34294e-08	1	0	0	-4.34294e-08	1	0	0	NaN	0.12389	0.102887	NaN
NaN	NaN	NaN	NaN	NaN	NaN	NaN	1.5852	1.8829	1.5909	NaN	NaN				IFNGR1							5	5	5	12.2	12.2	12.2	53.144	0	39.961	6665300000	2610400000	4054900000	-4.34294e-08	1	0	0	-4.34294e-08	1	0	0	-4.34294e-08	1	0	0	NaN	NaN	1.73405	NaN
0.26826	0.35582	0.30077	0.42954	0.35955	0.32465	0.27801	0.29055	0.27831	0.25394	0.25349	0.29796				COL18A1							11	11	11	13.3	13.3	13.3	151.63	0	255.48	116250000000	92531000000	23723000000	0.73543	0.0622927	-0.268143	-1.00379	1.9649	0.338167	0.153664	1.2092	0.416557	0.731182	0.117608	0.534126	0.30077	0.35955	0.27831	0.253715
0.6132	NaN	NaN	NaN	NaN	NaN	0.6864	0.7542	0.68239	0.67725	0.68865	0.63639				MPZL1							5	5	5	17.3	17.3	17.3	35.915	0	64.88	21330000000	12227000000	9102200000	-4.34294e-08	1	0	0	0.323891	0.714427	0.0498013	0.309237	-4.34294e-08	1	0	0	NaN	NaN	0.6864	0.68295
NaN	NaN	0.42244	NaN	NaN	1.2177	0.47144	0.44815	0.40415	0.41361	0.58283	0.43846				NEO1							16	16	16	15.1	15.1	15.1	159.35	0	95.179	20695000000	15342000000	5352800000	-4.34294e-08	1	0	0	0.305231	0.689115	-0.157024	-0.518573	-4.34294e-08	1	0	0	NaN	NaN	0.44815	0.49822
NaN	0.58139	NaN	0.86852	NaN	0.89254	0.75055	0.61398	0.7125	0.69382	0.78659	0.64668				IGSF8							8	8	8	24.8	24.8	24.8	63.957	0	104.84	17363000000	10778000000	6584700000	-4.34294e-08	1	0	0	0.296499	0.733765	-0.0987434	-0.427776	-4.34294e-08	1	0	0	NaN	0.88053	0.7125	0.740205
0.062565	0.06355	0.064082	0.068675	0.067808	0.06627	0.067794	NaN	NaN	0.058975	NaN	0.070258				ACE2							32	32	32	38.2	38.2	38.2	92.845	0	323.31	746150000000	717800000000	28353000000	2.14972	0.162759	-0.0921431	-0.779943	-4.34294e-08	1	0	0	-4.34294e-08	1	0	0	0.06355	0.067808	NaN	NaN
NaN	NaN	NaN	NaN	NaN	NaN	0.12808	0.13419	0.13287	0.18779	0.18034	0.16151				SLC4A7			+	Ratio H/L BL_Ratio H/L BL_TA			16	16	16	17.9	17.9	17.9	126.71	0	142.3	42840000000	40221000000	2618700000	-4.34294e-08	1	0	0	3.11289	0	-0.482807	-3.59719	-4.34294e-08	1	0	0	NaN	NaN	0.13287	0.184065
NaN	NaN	NaN	NaN	NaN	NaN	0.056905	NaN	0.096759	0.060823	0.070213	NaN				CANX							31	31	3	41.1	41.1	5.6	67.603	0	323.31	317780000000	313510000000	4269400000	-4.34294e-08	1	0	0	0.161519	0.701831	0.183298	0.369049	-4.34294e-08	1	0	0	NaN	NaN	0.076832	0.065518
0.11822	0.11277	0.085572	0.12105	0.10057	0.20481	0.24929	0.19586	0.12393	0.37067	0.15481	0.13161				CAV1 CAV					+	Ratio H/L AP_Ratio H/L BL	8	8	8	50	50	50	20.605	0	116.13	86941000000	76741000000	10200000000	0.480464	0.102353	-0.376007	-0.854603	0.251185	0.656881	-0.394593	-0.559662	1.14515	0.0427692	-0.802368	-1.86812	0.11277	0.12105	0.19586	0.26274
0.45015	0.46092	0.5115	0.4329	0.4333	0.42709	0.51716	0.50813	0.4534	0.451	0.50907	0.44039											20	20	20	20.3	20.3	20.3	97.191	0	237.35	201740000000	140480000000	61263000000	1.11538	0.0998095	0.135239	0.861288	0.137532	0.831958	0.0383685	0.191176	0.271453	0.838424	-0.0556454	-0.305525	0.46092	0.4329	0.50813	0.480035
[truncated: 2 more columns]

## Sheet: 5b. PTEN AP 4h
Significant	-log(P-value)	Difference	Protein IDs	Majority protein IDs	Protein names	Gene names	Majority protein IDs single	Only identified by site	Reverse	Potential contaminant	Surfaceome ID	Unique peptides	MS/MS count	Peptides	Razor + unique peptides	Sequence coverage [%]	Unique + razor sequence coverage [%]	Unique sequence coverage [%]	Mol. weight [kDa]	Q-value	Score	Intensity	Intensity Control_1	Intensity Control_2	Intensity Control_3	Intensity SF1670_1	Intensity SF1670_2	Intensity SF1670_3
+	2.48263	-1.03805	Q4LAL9	Q4LAL9			Q4LAL9				CTSD	9	84	9	9	29.8	29.8	29.8	44.32	0	102.05	255660000000	35.0752	35.252	35.551	34.1295	34.2055	34.429
+	1.96626	-0.862347	P60952;J9P730;F1PMW9	P60952;J9P730			P60952				CDC42	2	29	3	2	19.9	14.1	14.1	21.258	0	17.039	37776000000	32.4419	32.3343	32.9265	31.8041	31.5992	31.7123
+	2.39985	-0.690702	E2QZA8	E2QZA8			E2QZA8				FKBP10	4	13	4	4	9.3	9.3	9.3	64.353	0	27.005	20845000000	31.4964	31.7579	31.5033	30.742	30.9494	30.9941
+	2.71647	-0.682998	J9NWM0	J9NWM0			J9NWM0				SCAMP1	2	8	2	2	10.7	10.7	10.7	37.906	0	15.939	6947100000	30.0372	30.0908	30.1279	29.3265	NaN	29.4781
+	3.09428	0.466955	J9NZA9;F1PBA1;P50997;F1P767;F1PJF0;F1PRH6;J9P483;P50996	J9NZA9;F1PBA1;P50997			J9NZA9				ATP1A1	24	332	39	39	41.6	41.6	23.9	112.81	0	323.31	1737300000000	37.3881	37.2948	37.2749	37.773	37.7288	37.8568
+	2.95184	0.58145	F1PEF0	F1PEF0			F1PEF0				DSC3	14	67	16	14	26.5	23.9	23.9	97.607	0	123.47	130170000000	33.4537	33.6392	33.4221	34.0969	34.0555	34.1069
+	2.59066	0.819387	Q75ZY9;J9P743;Z4YHE9;F1PEM3;J9NY14;F1PR52;E2RQT0;F6XRA9	Q75ZY9;J9P743;Z4YHE9			Q75ZY9				MET	31	289	32	32	29.7	29.7	29.2	154.64	0	323.31	835250000000	35.782	36.1126	35.7739	36.7883	36.6177	36.7207
+	3.10978	0.878426	E2QV99;E2QWZ0;L7N093;F1PJA4	E2QV99			E2QV99				ATP8B1	25	141	26	26	26.6	26.6	25.6	143.96	0	213.38	201240000000	34.0766	33.7895	34.0518	34.8405	34.9008	34.812
+	3.46738	0.92256	E2R3X4;Q28269;F1PZF7;J9P475	E2R3X4;Q28269;F1PZF7			E2R3X4				OCLN	5	19	5	5	16.9	16.9	16.9	59.16	0	46.099	16848000000	30.2597	30.413	30.1515	31.1491	31.2485	31.1943
+	3.92879	0.949004	J9P2T1;F1PDU1	J9P2T1;F1PDU1			J9P2T1				NEO1	11	49	11	11	12.3	12.3	12.3	159.35	0	74.047	55355000000	32.0267	31.8773	31.9236	32.914	32.9572	32.8033
+	3.92117	1.15074	F1PTN5	F1PTN5			F1PTN5				TAP1	3	13	4	3	7.5	5.6	5.6	84.798	0	29.902	8219000000	29.1713	29.1695	28.9917	30.3599	30.2008	30.2239
+	2.39074	1.18472	E2R9T1	E2R9T1			E2R9T1				SLC5A6	4	22	4	4	7.1	7.1	7.1	69.3	0	31.892	69306000000	32.2084	32.3329	32.1876	33.6842	33.5533	33.0455
+	2.42772	1.31247	E2R7S5	E2R7S5			E2R7S5				RSL1D1	3	13	3	3	6.7	6.7	6.7	54.91	0	18.607	14242000000	29.9894	29.5283	29.8214	31.3436	31.1631	30.7698
	0.621444	0.296693	P16967;A0A0A0MPC0	P16967;A0A0A0MPC0			P16967				SSR1	3	22	3	3	11.9	11.9	11.9	31.976	0	19.672	43986000000	31.8432	32.1405	32.4953	32.4124	32.3045	32.6521
	0.33124	0.231155	F1PWR1;B1H0W0	F1PWR1;B1H0W0			F1PWR1				IGF2R	9	22	9	9	4.8	4.8	4.8	268.61	0	57.694	29928000000	31.3392	31.0938	31.7605	31.214	31.7656	31.9074
	1.60365	-0.450534	B6V8E6	B6V8E6			B6V8E6				CTNNB1	8	57	11	8	19.3	14.2	14.2	85.51	0	72.987	86440000000	33.4298	33.4623	33.4995	32.8346	32.946	33.2594
	1.92801	0.506805	E2QSB5	E2QSB5			E2QSB5				EFNB1	10	80	10	10	35.6	35.6	35.6	34.699	0	118.37	265470000000	34.5897	34.6391	34.3354	34.9094	35.1413	35.0339
	0.425945	-0.273277	E2QSC8	E2QSC8			E2QSC8				TSPAN8	5	32	5	5	25.7	25.7	25.7	25.802	0	93.255	223940000000	34.8328	34.9351	34.8813	34.08	34.7649	34.9845
	1.41133	0.697594	E2QUR7;E2QUR6	E2QUR7;E2QUR6			E2QUR7				GPNMB	6	48	6	6	13.2	13.2	13.2	61.73	0	56.208	339260000000	34.7655	34.4536	35.1797	35.6798	35.4428	35.3689
	0.750249	0.431881	E2QV61;F1Q3Q2	E2QV61;F1Q3Q2			E2QV61				DAO	7	76	7	7	20.2	20.2	20.2	39.134	0	57.088	818380000000	35.9283	36.0753	36.7672	36.5835	36.7148	36.7682
	1.34728	0.537647	E2QWS7	E2QWS7			E2QWS7				OSMR	6	43	6	6	9.9	9.9	9.9	108.98	0	47.725	25631000000	31.2041	31.3328	31.3438	31.5166	32.144	31.8331
	0.176879	-0.0415217	E2QX93;F6Y4F1	E2QX93			E2QX93				PCDH1	6	50	6	6	6.4	6.4	6.4	132.95	0	52.121	73934000000	32.8054	33.096	32.9097	32.9053	32.845	32.9361
	0.215605	0.0519142	E2QXF0;J9NX36;E2QXC4	E2QXF0			E2QXF0				FOLR2	22	399	22	22	58	58	58	29.669	0	271.6	2939600000000	38.1988	38.4703	38.3851	38.3711	38.4983	38.3405
	0.29614	0.238711	E2QXF2	E2QXF2			E2QXF2				LGMN	2	7	2	2	7.2	7.2	7.2	49.456	0	14.189	19286000000	30.6994	30.432	31.5038	31.0077	31.1895	31.1541
	0.594044	-0.763423	E2QXH3	E2QXH3			E2QXH3				TINAGL1	2	8	2	2	4.9	4.9	4.9	52.315	0	12.188	10082000000	30.3477	30.7266	30.4113	30.2663	28.6073	30.3217
	1.6658	0.430653	E2QXI6	E2QXI6			E2QXI6				TPBG	11	146	11	11	32.4	32.4	32.4	45.695	0	160.69	341390000000	34.8411	35.03	35.2142	35.4214	35.5533	35.4026
	1.05862	0.323109	E2QY54	E2QY54			E2QY54				SSR4	5	26	5	5	36.4	36.4	36.4	18.943	0	34.496	136000000000	33.7341	33.5649	34.0268	34.1693	34.0053	34.1206
	0.405598	0.354251	E2QY93	E2QY93			E2QY93				NCLN	7	20	7	7	16.7	16.7	16.7	63.1	0	65.305	21934000000	31.4055	31.5847	30.5935	31.1419	31.8438	31.6607
	0.142856	-0.0605748	E2QYL0	E2QYL0			E2QYL0				TMED10	5	49	5	5	22.3	22.3	22.3	25.226	0	45.846	208400000000	34.496	34.5003	34.9277	34.7034	34.4822	34.5567
	0.224604	-0.10775	P25473;E2QYU2	P25473;E2QYU2			P25473				CLU	19	164	20	20	39.1	39.1	36.4	51.789	0	323.31	519190000000	35.8103	35.9729	36.1701	35.6006	35.8892	36.1403
	1.08777	0.874666	E2QZH1	E2QZH1			E2QZH1				TSPAN14	2	9	2	2	7.8	7.8	7.8	30.631	0	13.949	13146000000	29.6524	29.6014	30.7046	30.7692	30.7205	31.0927
	0.441466	-0.0722427	E2QZT4	E2QZT4			E2QZT4				BSG	13	166	13	13	49.3	49.3	49.3	29.302	0	185.04	1326700000000	37.223	37.287	37.3049	37.0709	37.2397	37.2876
	1.86831	0.799288	E2QZY0	E2QZY0			E2QZY0				NTN4	6	17	6	6	16.2	16.2	16.2	69.84	0	39.038	51336000000	31.6559	32.3051	32.0588	32.7826	32.8271	32.808
	0.87366	-0.296739	E2R0Y5	E2R0Y5			E2R0Y5				SUCLG1	6	47	6	6	22.8	22.8	22.8	36.109	0	97.527	137390000000	33.8597	34.1616	34.1787	33.5376	33.9343	33.8379
	0.109442	0.0852445	E2R0Z0;E2R858;J9NXY3;E2R971	E2R0Z0			E2R0Z0				CDH6	22	284	22	22	32.2	32.2	32.2	88.65	0	229.07	1486900000000	37.5592	37.0752	37.6712	37.0923	37.7203	37.7486
	1.53738	-0.442933	E2R1N7	E2R1N7			E2R1N7				PCYOX1	3	15	3	3	8.5	8.5	8.5	56.704	0	21.328	14002000000	30.9235	30.7951	30.8917	30.3739	30.6691	30.2385
	0.625575	0.120271	E2R2V6	E2R2V6			E2R2V6				L1CAM	45	588	45	45	38.5	38.5	38.5	140.05	0	323.31	3521100000000	38.5247	38.6347	38.5628	38.6691	38.5697	38.8443
	0.0231767	0.0142968	E2R2Z8;F1PKF1	E2R2Z8;F1PKF1			E2R2Z8				TMEM30A	4	26	5	5	16.9	16.9	14.7	40.691	0	34.334	27149000000	31.2617	31.6031	31.8572	31.4551	31.8127	31.4971
	2.72429	0.219578	E2R4C1	E2R4C1			E2R4C1				M6PR	4	30	4	4	13.1	13.1	13.1	43.246	0	29.897	58932000000	32.6571	32.62	32.7056	32.8468	32.8917	32.9029
	0.502919	0.295711	E2R4F0;J9P8K7	E2R4F0			E2R4F0				CELSR2	12	48	12	12	6.2	6.2	6.2	317.63	0	78.924	47024000000	31.7883	32.4348	32.5334	32.6857	32.3369	32.6211
	1.0573	0.392717	E2R4Q1;J9P315	E2R4Q1;J9P315			E2R4Q1				LRP1	14	46	14	14	4.2	4.2	4.2	502.76	0	93.244	48794000000	31.9027	32.3339	32.1963	32.3763	32.464	32.7707
	0.324048	0.0903727	E2R4T7;E2R4T5	E2R4T7;E2R4T5			E2R4T7				HSD17B4	14	97	14	14	26.3	26.3	26.3	79.689	0	121.33	212970000000	34.4935	34.4337	34.674	34.486	34.7901	34.5962
	0.338427	-0.0280253	J9P4T2;E2R508;J9P001;J9NZY6;J9PAG8;F1PN80;F1PWX4	J9P4T2;E2R508;J9P001			J9P4T2				ADAM9	21	146	21	21	36.9	36.9	36.9	72.143	0	191.82	369500000000	35.3486	35.4539	35.3922	35.3969	35.3701	35.3437
	1.65233	-0.885898	E2R5Z5	E2R5Z5			E2R5Z5				TM9SF2	5	33	5	5	7.7	7.7	7.7	75.641	0	37.429	54521000000	32.8762	32.9444	33.0635	31.7666	31.9157	32.544
	0.818808	-0.327038	E2R6A6	E2R6A6			E2R6A6				EPHA1	7	22	7	7	10.2	10.2	10.2	107.48	0	43.218	36360000000	31.8463	32.0067	32.3713	31.9305	31.5842	31.7285
	1.51113	0.714378	F1P7K9;E2R6B8;F1PFW3	F1P7K9;E2R6B8;F1PFW3			F1P7K9				CA14	3	17	3	3	9.2	9.2	9.2	37.472	0	18.949	73004000000	32.6252	32.2922	32.8594	33.1107	33.587	33.2223
	1.44994	-0.7831	E2R6Q7	E2R6Q7			E2R6Q7				CTSB	10	99	10	10	34.8	34.8	34.8	37.685	0	95.899	342200000000	35.3349	35.6189	35.9105	34.4644	34.9912	35.0594
	0.476344	-0.19013	J9P8P9;E2R7S1;F1PHQ7;E2R4W3;J9PB54;E2RF35	J9P8P9;E2R7S1;F1PHQ7;E2R4W3			J9P8P9				ATP2B1	5	27	5	5	6.7	6.7	6.7	129.49	0	32.295	25720000000	31.6271	31.8919	31.397	31.4733	31.2683	31.6041
	1.13101	-0.545049	E2R925;J9P0R7	E2R925;J9P0R7			E2R925				RTN4	3	26	3	3	4.5	4.5	4.5	129.34	0	32.461	72940000000	33.1638	33.4384	33.446	33.0178	32.3909	33.0043
	0.135893	0.0413755	E2R948	E2R948			E2R948				VDAC2	17	267	18	18	64.6	64.6	64.6	31.578	0	323.31	1764100000000	37.39	37.6497	37.7555	37.5892	37.641	37.6891
	0.568701	0.33961	E2R949	E2R949			E2R949				SLC44A1	5	29	5	5	10	10	10	73.204	0	38.746	96513000000	32.6835	33.5289	33.3796	33.6056	33.4369	33.5684
	0.791952	-0.595825	E2RB31	E2RB31			E2RB31				HYOU1	7	33	7	7	12.3	12.3	12.3	111.43	0	54.055	22650000000	31.4285	31.3012	31.5767	30.434	30.5738	31.5111
	0.359985	0.113077	E2RB35	E2RB35			E2RB35				FLRT2	9	44	9	9	18.6	18.6	18.6	73.834	0	67.656	95091000000	33.084	33.3041	33.2796	33.4516	33.114	33.4414
	0.724245	0.666301	J9P351;E2RB44	J9P351;E2RB44			J9P351				SLC5A9	3	9	3	3	6.9	6.9	6.9	64.909	0	18.89	14568000000	30.6332	30.3787	29.8199	31.3188	31.2592	30.2528
	1.37283	-0.403622	E2RBD3	E2RBD3			E2RBD3				IGSF5	2	5	2	2	7.8	7.8	7.8	39.713	0	17.977	25329000000	31.7947	31.8987	31.5535	31.1622	31.4368	31.4371
	0.254381	-0.0675278	E2RBL9	E2RBL9			E2RBL9				ITGB6	26	391	26	26	38	38	38	88.344	0	323.31	2889300000000	38.4725	38.2952	38.2501	38.2481	38.4218	38.1453
	0.20321	0.0768242	E2RC10	E2RC10			E2RC10				SYPL1	5	28	5	5	28.9	28.9	28.9	24.518	0	39.501	146250000000	33.7946	33.9027	34.1768	33.9284	33.9595	34.2167
	0.797085	0.654888	E2RCD7	E2RCD7			E2RCD7				MRPL2	2	5	2	2	11.4	11.4	11.4	33.029	0	11.934	9500600000	30.1112	29.2323	29.1043	29.9172	29.9387	30.5565
	0.643615	-0.172574	E2RD92	E2RD92			E2RD92				MLEC	3	21	3	3	14.9	14.9	14.9	32.064	0	23.144	25983000000	31.6418	31.4941	31.9023	31.5472	31.4936	31.4797
	0.592333	0.178724	E2RE57	E2RE57			E2RE57				ENTPD3	10	81	10	10	22.9	22.9	22.9	59.243	0	148.13	265000000000	34.867	34.5992	34.921	34.85	35.1517	34.9217
	0.876496	0.174367	E2RE80;E2RE81	E2RE80;E2RE81			E2RE80				PTPRF	51	394	56	56	40.5	40.5	36.9	210.83	0	323.31	923590000000	36.5846	36.6803	36.3867	36.6862	36.6974	36.7911
	0.554134	0.0606219	E2REA9	E2REA9			E2REA9				ITGA2	54	865	54	54	43.7	43.7	43.7	129.67	0	323.31	7610100000000	39.6202	39.7172	39.7319	39.8073	39.6915	39.7524
	0.757324	0.220042	E2REV2	E2REV2			E2REV2				CDH16	16	149	16	16	27	27	27	90.032	0	202.75	501190000000	35.7265	35.3231	35.6994	35.863	35.7727	35.7734
	0.773599	0.26802	E2RF18	E2RF18			E2RF18				CYB5R1	7	29	7	7	25.2	25.2	25.2	33.943	0	41.938	48590000000	32.4909	32.1463	31.9933	32.5188	32.5592	32.3566
	0.0800668	0.0500221	E2RF90	E2RF90			E2RF90				CD74	4	43	4	4	13.1	13.1	13.1	33.564	0	61.524	126390000000	33.7744	33.5938	33.7963	33.3596	34.0564	33.8985
	0.412019	0.135757	J9P3K8;E2RFD0	J9P3K8;E2RFD0			J9P3K8				HMGCL	11	148	11	11	45.1	45.1	45.1	26.878	0	241.94	450540000000	35.6645	35.491	35.5802	35.973	35.6186	35.5514
	0.61065	-0.115096	E2RG27;E2RG59	E2RG27;E2RG59			E2RG27				KTN1	38	206	38	38	32.6	32.6	32.6	156.56	0	323.31	413070000000	35.5067	35.615	35.7829	35.4671	35.5435	35.5486
	1.24947	0.115039	E2RG47	E2RG47			E2RG47				STT3B	6	33	6	6	9.6	9.6	9.6	93.67	0	45.779	56710000000	32.5152	32.5905	32.6454	32.6572	32.713	32.726
	0.242026	0.202854	E2RGN0	E2RGN0			E2RGN0				PLAUR	3	32	3	3	15.7	15.7	15.7	26.025	0	29.078	45540000000	31.6704	32.795	32.3051	32.4757	32.3521	32.5513
	0.331305	-0.500567	E2RGR9	E2RGR9			E2RGR9				FH	3	15	3	3	11.4	11.4	11.4	54.451	0	25.548	5621900000	NaN	29.8667	29.0493	29.3684	28.1541	29.3498
	0.846091	0.735765	E2RGY9	E2RGY9			E2RGY9				ELOVL1	3	19	3	3	13.7	13.7	13.7	32.539	0	22.879	21326000000	30.0181	31.1085	31.3177	31.4969	31.566	31.5887
	0.263576	-0.276972	E2RHN1	E2RHN1			E2RHN1				GRN	2	11	2	2	6.3	6.3	6.3	61.98	0	13.443	6307400000	29.3584	30.4314	29.5768	29.7011	29.8404	28.9941
	0.00917368	0.0089976	E2RHV1	E2RHV1			E2RHV1				SEMA4C	4	7	4	4	5.8	5.8	5.8	92.455	0	24.077	14358000000	30.9515	30.5905	30.2987	30.1144	30.9862	30.7671
	1.86946	0.550599	E2RHY7	E2RHY7			E2RHY7				SERPINH1	22	250	22	22	52.2	52.2	52.2	46.582	0	323.31	1468100000000	36.8048	36.986	37.2454	37.5223	37.5532	37.6125
	1.63192	0.806395	E2RIG0	E2RIG0			E2RIG0				NDUFA10	8	42	8	8	30.1	30.1	30.1	39.873	0	63.512	64591000000	32.4759	31.9757	32.5955	33.0279	33.3998	33.0386
	1.57486	-0.427595	J9JHJ2;E2RJ06	J9JHJ2;E2RJ06			J9JHJ2				RPSA LOC106559170	6	47	6	6	24.4	24.4	24.4	32.898	0	48.295	58184000000	33.0022	32.9032	32.9434	32.3561	32.4514	32.7585
	1.12634	0.563906	E2RJ93	E2RJ93			E2RJ93				GLS	7	18	7	7	13.4	13.4	13.4	83.021	0	43.579	35507000000	31.8901	31.5321	31.5082	31.8239	32.5003	32.298
	1.03333	0.262184	E2RJT2	E2RJT2			E2RJT2				BST1	12	115	12	12	35.7	35.7	35.7	35.387	0	94.781	616640000000	35.9617	35.889	36.0464	36.1361	36.4472	36.1004
	0.382026	0.142676	E2RK67	E2RK67			E2RK67				TMX1	6	49	6	6	19.1	19.1	19.1	31.515	0	48.404	192070000000	34.4853	34.0502	34.4044	34.5604	34.2931	34.5145
	0.440455	0.165696	E2RK97;F1PYV2	E2RK97			E2RK97				MFSD6	3	8	3	3	6.8	6.8	6.8	87.786	0	18.563	6571200000	29.3432	29.7081	29.3222	29.7267	29.724	29.4199
	0.697866	-0.230822	E2RKK6	E2RKK6			E2RKK6				PRKCSH	2	11	2	2	4.1	4.1	4.1	60.49	0	14.231	11113000000	30.4215	30.1406	30.5948	30.1888	30.0162	30.2594
	0.55193	0.587526	E2RKP5	E2RKP5			E2RKP5				HPN	5	24	5	5	16.1	16.1	16.1	44.904	0	43.684	33350000000	31.658	31.7442	30.5056	31.411	32.0032	32.2563
	0.903599	0.20255	E2RKQ6	E2RKQ6			E2RKQ6				LGALS3BP	8	63	8	8	21.8	21.8	21.8	62.21	0	76.238	98462000000	33.3374	33.29	33.5014	33.4839	33.5091	33.7436
	0.680167	-0.234287	E2RKS8	E2RKS8			E2RKS8				PIGO	5	21	5	5	21.1	21.1	21.1	38.57	0	46.412	24156000000	31.5455	31.7487	31.6519	31.3534	31.1991	31.6907
	0.122671	-0.0318044	E2RKY7	E2RKY7			E2RKY7				FLRT3	16	111	16	16	33.9	33.9	33.9	73.141	0	122.66	228940000000	34.6619	34.7865	34.4997	34.707	34.5573	34.5883
	0.386268	-0.121012	J9NVU0;E2RL88	J9NVU0;E2RL88			J9NVU0				ITGA6	24	145	24	24	31.6	31.6	31.6	119.5	0	323.31	320720000000	35.1779	35.1716	35.2238	34.8617	35.037	35.3115
	0.0711875	0.0201492	E2RLA2;E2RLB8	E2RLA2;E2RLB8			E2RLA2				P4HA1	4	19	4	4	10.5	10.5	10.5	61.047	0	27.216	28938000000	31.6095	31.6713	31.7136	31.5245	31.8513	31.6791
	0.262224	0.10582	E2RLA5	E2RLA5			E2RLA5				GOLM1	2	5	2	2	5.9	5.9	5.9	45.582	0	12.346	3992600000	28.6455	28.6891	28.796	29.0916	28.7997	28.5568
	0.0354283	-0.0124105	E2RM56	E2RM56			E2RM56				PLXNB1	17	96	17	17	12.4	12.4	12.4	232.9	0	201.4	179420000000	34.3445	34.4608	34.1447	34.2131	34.2482	34.4516
	0.814213	0.87712	E2RMA6	E2RMA6			E2RMA6				SLC39A6	2	8	2	2	3.1	3.1	3.1	82.622	0	12.428	6962700000	28.6055	29.7594	NaN	30.288	29.8409	30.0497
	0.613432	0.18154	E2RMC0	E2RMC0			E2RMC0				ITPR3	12	47	12	12	6.9	6.9	6.9	303.7	0	82.937	50500000000	32.454	32.5566	32.1236	32.546	32.6066	32.5263
	0.440756	0.120358	E2RMT2;F1PHH3	E2RMT2;F1PHH3			E2RMT2				PTK7	35	481	35	35	41.5	41.5	41.5	118.42	0	323.31	2229400000000	37.6641	37.9811	38.0256	37.9552	38.0454	38.0312
	0.0733571	-0.0457115	E2RN10	E2RN10			E2RN10				B2M	3	23	3	3	18.4	18.4	18.4	14.263	0	26.24	75748000000	32.9389	33.1316	33.1457	32.6106	33.215	33.2535
	0.596366	0.1223	E2RNQ5	E2RNQ5			E2RNQ5				DHCR7	5	26	5	5	10.5	10.5	10.5	54.394	0	32.722	48763000000	32.3457	32.2384	32.3794	32.2818	32.5392	32.5094
	0.193797	0.107077	E2RP67;J9P0C6	E2RP67			E2RP67				TBL2	5	33	5	5	16.4	16.4	16.4	49.991	0	42.893	31095000000	31.3387	31.5661	31.8479	31.8842	31.3903	31.7994
	1.15384	0.210918	J9P4E7;E2RPA8	J9P4E7;E2RPA8			J9P4E7				CD151	4	21	4	4	15.7	15.7	15.7	29.236	0	24.703	144430000000	34.0698	33.7969	33.8671	34.1057	34.1738	34.0871
	0.766942	-0.607116	E2RPE9	E2RPE9			E2RPE9				APMAP	4	28	4	4	12.3	12.3	12.3	46.282	0	29.387	37048000000	32.4525	31.8764	32.2872	31.007	32.1134	31.6744
	1.59773	-0.173391	E2RPP1	E2RPP1			E2RPP1				LAMA3	19	91	20	20	7.2	7.2	6.8	367.68	0	141.66	161800000000	34.1918	34.2835	34.2956	34.0251	34.1534	34.0722
	1.33431	0.424714	E2RQ08	E2RQ08			E2RQ08				RPN1	33	271	33	33	61.3	61.3	61.3	68.576	0	323.31	814850000000	36.1206	36.1799	36.5647	36.8187	36.6527	36.6681
	0.308193	-0.156276	F5C3N2;E2RQ25;F6M3K2	F5C3N2;E2RQ25			F5C3N2				MME	6	15	6	6	11.3	11.3	11.3	85.549	0	38.973	26398000000	31.9366	31.903	31.6133	31.6415	31.9816	31.3608
	0.691867	0.683172	J9NVV3;E2RQC7	J9NVV3;E2RQC7			J9NVV3				LMF2	2	13	2	2	5.6	5.6	5.6	70.695	0	15.671	20082000000	30.8805	29.7805	31.0882	31.4721	31.4477	30.8789
	0.714065	-0.182309	J9P5W3;E2RRH2	J9P5W3;E2RRH2			J9P5W3				MAGT1	5	26	5	5	17.5	17.5	17.5	36.165	0	32.219	70215000000	33.2179	33.0796	33.3183	33.2027	32.8858	32.9804
	1.95891	0.542543	E2RS95	E2RS95			E2RS95				TM7SF2	4	15	4	4	11.7	11.7	11.7	46.625	0	24.832	33583000000	31.484	31.6076	31.6182	32.0382	32.3348	31.9644
	0.162393	-0.10906	E2RSD0	E2RSD0			E2RSD0				TM9SF3	5	40	5	5	8.5	8.5	8.5	67.542	0	38.174	100710000000	33.3941	33.3867	33.8434	33.029	33.6617	33.6063
	0.162295	0.103698	E2RSW3	E2RSW3			E2RSW3				FRRS1	4	9	4	4	8.1	8.1	8.1	65.786	0	24.825	23960000000	31.0003	31.4671	31.6817	31.6749	31.5511	31.2341
	0.163025	0.0303663	E2RT60	E2RT60			E2RT60				ITGB1	38	1127	38	38	40.6	40.6	40.6	88.123	0	323.31	6744500000000	39.4819	39.5329	39.6111	39.5125	39.5139	39.6906
	0.396122	0.150265	E2RTD2	E2RTD2			E2RTD2				SLC33A1	3	6	3	3	6.7	6.7	6.7	60.737	0	16.626	13611000000	30.5423	30.4162	30.4123	30.6825	30.8292	30.31
	1.31434	0.276045	J9P735;F1P6D7	J9P735;F1P6D7			J9P735				CD47	5	63	5	5	18.2	18.2	18.2	33.15	0	58.481	124990000000	33.652	33.9232	33.7125	34.1417	34.0151	33.959
	1.21269	0.430843	F1P6G0;E2R0M2	F1P6G0			F1P6G0				PLXNA1	8	28	10	9	6.6	6.1	5.3	211.66	0	52.479	36322000000	31.8327	31.9691	31.4348	32.2193	32.0831	32.2267
	0.892021	0.180673	F1P6Z9;F1P7M7;F1P702	F1P6Z9;F1P7M7;F1P702			F1P6Z9				CADM1	13	107	13	13	47	47	47	44.494	0	245.15	392170000000	35.4069	35.4687	35.2961	35.5006	35.7305	35.4827
	0.159719	-0.086832	F1P7R0;F1P7Q7	F1P7R0;F1P7Q7			F1P7R0				FAS	2	14	2	2	11.9	11.9	11.9	35.431	0	19.266	31267000000	31.9778	31.9452	31.696	31.4601	31.8031	32.0954
	0.199138	0.0766233	F1P8N6;P41148	F1P8N6;P41148			F1P8N6				HSP90B1	23	178	25	25	33.5	33.5	31.8	92.384	0	232.5	484410000000	35.6855	35.6028	35.8235	35.5138	35.9138	35.914
	2.20922	0.201229	F1P8Q0	F1P8Q0			F1P8Q0				ITGAV	55	1155	55	55	51.9	51.9	51.9	112.53	0	323.31	10368000000000	39.9907	40.0981	40.0952	40.2738	40.2342	40.2797
	1.15217	0.248353	F1P8R0	F1P8R0			F1P8R0				STEAP3	8	40	8	8	16.5	16.5	16.5	57.772	0	58.62	78947000000	32.9156	33.2164	32.9412	33.2321	33.3351	33.251
	1.97624	-0.4458	F1P8Z5	F1P8Z5			F1P8Z5				APOB	3	10	5	3	1.4	0.8	0.8	501.53	0	18.188	26384000000	31.802	31.7264	31.9654	31.5151	31.2819	31.3594
	0.6619	0.146306	F1P983;J9NUR9	F1P983;J9NUR9			F1P983				PTPRJ	23	190	23	23	24.5	24.5	24.5	135.85	0	247.94	641100000000	36.0185	36.0498	36.2381	36.1994	36.1539	36.392
	0.0654066	0.0297445	F1P984	F1P984			F1P984				SPINT2	3	34	3	3	16.7	16.7	16.7	28.053	0	40.69	51759000000	32.4171	32.5309	32.544	32.7285	32.2264	32.6262
	1.00402	0.144932	F1P992;J9P8H0	F1P992;J9P8H0			F1P992				CXADR	22	195	22	22	63.7	63.7	63.7	39.487	0	228.42	692200000000	36.1951	36.1095	36.2213	36.3952	36.2045	36.3609
	0.425826	-0.134773	F1P9I9	F1P9I9			F1P9I9				CTSA	2	21	2	2	5.2	5.2	5.2	56.524	0	14.44	13436000000	30.5122	30.5945	30.7315	30.683	30.4804	30.2705
	0.0107968	-0.0022138	F1P9K1	F1P9K1			F1P9K1				IGSF3	41	328	41	41	45.3	45.3	45.3	134.1	0	323.31	1221600000000	37.1078	37.1384	37.136	37.0373	37.0818	37.2565
	0.198457	-0.0502256	F1P9S5;J9NRH0	F1P9S5			F1P9S5				PLXNB2	63	734	63	63	38.2	38.2	38.2	205.04	0	323.31	3580800000000	38.6904	38.6681	38.6666	38.4377	38.6734	38.7633
	1.15838	-0.513516	F1P9T5	F1P9T5			F1P9T5				FKBP11	2	9	2	2	13.7	13.7	13.7	22.582	0	12.326	8832400000	30.2853	30.0643	30.1482	29.3834	30.0392	29.5346
	0.311269	0.114833	F1P9U5	F1P9U5			F1P9U5				SLC44A4	7	65	7	7	10.5	10.5	10.5	78.876	0	74.228	381890000000	35.3973	35.1327	35.6144	35.5452	35.5617	35.3819
	0.114024	0.10467	Q8WMU5;F1P9V1	Q8WMU5;F1P9V1			Q8WMU5				FZD6	5	27	5	5	9.1	9.1	9.1	80.179	0	32.016	51609000000	32.4265	32.0055	32.562	31.9923	32.34	32.9758
	1.77672	-0.48037	F1P9W5	F1P9W5			F1P9W5				SLC12A2	12	65	12	12	16.3	16.3	16.3	110.53	0	109.89	212940000000	34.8312	35.072	34.7687	34.2672	34.5384	34.4251
	2.13641	0.612929	F1P9X6;F1P9X5	F1P9X6;F1P9X5			F1P9X6				SEMA4B	12	66	12	12	21	21	21	92.366	0	100.95	164650000000	33.6966	33.764	33.9802	34.52	34.506	34.2536
	1.42001	0.767576	F1PA89	F1PA89			F1PA89				SLC39A10	3	18	3	3	7.7	7.7	7.7	55.012	0	22.771	16557000000	30.6713	29.8864	30.5206	31.006	31.1134	31.2617
	0.0102019	-0.0172354	F1PAA3	F1PAA3			F1PAA3				CDH3	3	8	3	3	5.4	5.4	5.4	91.153	0	18.058	14688000000	30.7166	30.868	30.2474	29.5518	31.0087	31.2198
	1.50626	0.130973	F1PAA4;F1PAA9	F1PAA4;F1PAA9			F1PAA4				CDH1	17	215	17	17	21.8	21.8	21.8	91.483	0	239.11	966090000000	36.6864	36.724	36.5965	36.7727	36.8154	36.8116
	1.50702	0.314626	F1PAF1;F1PNA5;E2R7J5;F1PRX7;F1PRX3;E2RMF7;F1P925;F1PYW2	F1PAF1			F1PAF1				EPHB2	12	61	14	12	19.5	17.5	17.5	107.44	0	99.939	88773000000	33.2187	33.1198	32.9248	33.3271	33.4766	33.4034
	0.0787432	-0.0617504	F1PAL6;J9P7G3	F1PAL6;J9P7G3			F1PAL6				DDO	4	25	4	4	19.4	19.4	19.4	36.807	0	43.982	21451000000	31.2632	31.1431	31.3063	30.6328	31.4166	31.478
	0.880106	0.683742	F1PAM6;J9P1R3	F1PAM6;J9P1R3			F1PAM6				SLC27A4	2	5	2	2	5.1	5.1	5.1	72.06	0	11.591	4986200000	28.5949	29.0835	28.8201	30.1632	29.3323	29.0542
	1.67378	-0.413584	F1PAR8;J9P0Q7;J9P9X2	F1PAR8;J9P0Q7			F1PAR8				PHB	12	63	12	12	43.5	43.5	43.5	29.723	0	90.717	342980000000	35.466	35.4902	35.5614	34.9424	35.031	35.3035
	0.568953	0.115715	F1PAX2;ENSEMBL:ENSBTAP00000031900;CON__ENSEMBL:ENSBTAP00000031900	F1PAX2			F1PAX2				CP	21	173	21	21	25.8	25.8	25.8	122.56	0	226.34	463680000000	35.5885	35.7515	35.8022	35.7046	35.91	35.8747
	0.541356	0.0661825	F1PB95	F1PB95			F1PB95				ICAM1	3	491	27	27	36.7	36.7	7	58.123	0	264.11	2568800000000	38.0952	38.1531	38.1623	38.2985	38.1795	38.1311
	2.09713	0.484477	F1PC23	F1PC23			F1PC23				SLC39A4	11	222	11	11	20.6	20.6	20.6	62.716	0	311.05	1224600000000	36.7608	36.8194	36.9335	37.228	37.2478	37.4914
	0.355635	-0.126143	F1PC58;J9JHD4	F1PC58;J9JHD4			F1PC58				ACAT1	9	94	9	9	35.6	35.6	35.6	43.989	0	121.47	96854000000	33.4181	33.3889	33.6442	33.1277	33.3939	33.5512
	0.846258	0.173628	F1PCD8	F1PCD8			F1PCD8				LAMB1	12	79	12	12	11.6	11.6	11.6	181.93	0	151.88	75237000000	33.0808	33.0459	32.8033	33.223	33.1347	33.0931
	0.847854	0.143283	J9P280;F1PCM5	J9P280;F1PCM5			J9P280				TMEM8A	2	13	2	2	4	4	4	83.286	0	19.893	14116000000	30.5578	30.4981	30.7075	30.7268	30.6506	30.8159
	0.593344	-0.207141	F1PCQ3	F1PCQ3			F1PCQ3				SLC16A1	16	117	16	16	26.5	26.5	26.5	53.747	0	144.65	442480000000	35.4386	35.9062	35.8758	35.4567	35.5567	35.5858
	0.0355934	0.0168076	F1PDP5	F1PDP5			F1PDP5				CD276	5	29	5	5	17.8	17.8	17.8	57.05	0	30.576	62546000000	32.8755	32.517	33.005	32.7493	32.9462	32.7525
	1.39524	0.348474	F1PEF1;J9P6A9	F1PEF1;J9P6A9			F1PEF1				DSC2	34	285	36	36	45.7	45.7	43.2	100.82	0	323.31	1086200000000	36.5581	36.7918	36.8939	37.0209	37.2166	37.0517
	2.154	0.577807	Q9GLD3;F1PEN6	Q9GLD3;F1PEN6			Q9GLD3				TFRC	9	37	9	9	15.8	15.8	15.8	86.648	0	83.916	58644000000	32.2544	32.3937	32.3551	33.0445	32.7035	32.9885
	2.13062	-0.189	F1PF03	F1PF03			F1PF03				EGFR	18	126	19	18	20.8	19.7	19.7	131.53	0	145.5	282450000000	35.016	35.0759	35.1127	34.9129	34.8942	34.8303
	0	0.872578	F1PF09	F1PF09			F1PF09				PMPCA	2	11	2	2	5.3	5.3	5.3	58.569	0	33.29	4736500000	NaN	NaN	28.5095	29.4326	30.401	28.3127
	1.1621	1.03234	F1PF63;J9P9X5	F1PF63;J9P9X5			F1PF63				ST14	11	56	11	11	18.5	18.5	18.5	92.141	0	93.307	145640000000	32.391	33.6844	33.4433	34.4609	34.1146	34.0401
	1.59679	-0.11539	F1PFD6;F1PUR3;F1PUQ3	F1PFD6			F1PFD6				TENM4	23	104	23	23	12.3	12.3	12.3	307.73	0	187.24	139080000000	34.0804	34.0651	34.0875	33.9415	33.9193	34.0259
	1.00432	-0.155416	F1PFM5	F1PFM5			F1PFM5				LAMB3	31	166	31	31	39	39	39	129.32	0	323.31	355300000000	35.4653	35.3733	35.41	35.1327	35.2878	35.3618
	1.03622	0.695094	O46550;F1PFX6	O46550;F1PFX6			O46550				CAV2 CAV-2	2	13	2	2	23.5	23.5	23.5	17.931	0	15.317	21573000000	30.6325	30.4527	31.2857	31.6648	31.1102	31.6812
	0.251259	0.106497	F1PFZ5	F1PFZ5			F1PFZ5				MFGE8	15	123	15	15	40.7	40.7	40.7	47.824	0	218.47	447480000000	35.6502	35.5973	35.8133	35.5055	35.838	36.0368
	1.20434	0.228867	F1PFZ9	F1PFZ9			F1PFZ9				ADAM17	10	78	10	10	13.2	13.2	13.2	92.736	0	66.088	265170000000	34.817	34.7137	34.6609	34.8168	35.0795	34.9818
	1.42037	0.898976	F1PG57	F1PG57			F1PG57				LIPH	6	20	6	6	20.2	20.2	20.2	51.061	0	41.82	35885000000	31.2426	31.2829	32.0957	32.2725	32.6115	32.4341
	0.219782	0.0577685	F1PG66	F1PG66			F1PG66				LAMC2	25	172	26	26	31.8	31.8	31.2	131.07	0	283.67	215430000000	34.6134	34.5621	34.3994	34.4408	34.5913	34.7161
	1.43849	0.345515	F1PGD5	F1PGD5			F1PGD5				CD302	41	393	41	41	27.6	27.6	27.6	198.29	0	323.31	1662000000000	37.257	37.1813	37.4572	37.4985	37.7516	37.6819
	0.198382	-0.375089	F1PGJ7;J9P5N9	F1PGJ7;J9P5N9			F1PGJ7				DDR1	5	7	5	5	8	8	8	101.82	0	30.482	15495000000	31.1684	31.5577	29.2984	30.0808	30.7139	30.1046
	0	-1.1939	F1PGL0	F1PGL0			F1PGL0				ADAMTS1	2	6	2	2	3.8	3.8	3.8	102.65	0	18.055	4645400000	28.9189	29.9121	30.15	NaN	NaN	28.4664
	0.882771	0.456679	J9P884;F1PGL1	J9P884;F1PGL1			J9P884				VCAN	9	35	9	9	4.5	4.5	4.5	260.62	0	67.707	56474000000	32.4221	32.8241	32.1391	32.6726	32.9394	33.1434
	0.362101	0.181339	F1PGL5	F1PGL5			F1PGL5				CPM	11	127	11	11	40.2	40.2	40.2	41.429	0	149.75	461520000000	35.3504	35.5203	35.8601	35.5015	35.7677	36.0056
	0.305418	0.0779889	F1PGR0	F1PGR0			F1PGR0				ADAM10	18	258	18	18	27.3	27.3	27.3	85.069	0	296.9	1168900000000	36.8211	36.9821	37.0682	36.887	37.0929	37.1255
	0.254775	0.0559769	F1PGX2;F1PGX1	F1PGX2;F1PGX1			F1PGX2				DSG2	59	1465	59	59	55.9	55.9	55.9	122.36	0	323.31	8394100000000	39.858	39.9517	39.7796	39.7785	39.9648	40.014
	0.534966	0.133564	F1PH09;J9PA58	F1PH09;J9PA58			F1PH09				CENPV	6	53	6	6	40	40	40	19.428	0	90.9	195330000000	34.3221	34.2778	34.5742	34.5704	34.4061	34.5984
	1.45083	0.319782	F1PH14	F1PH14			F1PH14				TMEM2	15	47	15	15	15.8	15.8	15.8	153.98	0	111.92	132720000000	33.6419	33.668	33.9359	34.0339	34.1495	34.0218
	2.00634	0.36401	F1PH17;E2R6Z2	F1PH17			F1PH17				PTPRD	18	129	23	18	18	14.3	14.3	211.76	0	194.6	218260000000	34.2399	34.4421	34.3683	34.613	34.7434	34.7859
	0.0800204	-0.0217527	F1PHK9	F1PHK9			F1PHK9				LAMC1	28	130	28	28	26.3	26.3	26.3	164.63	0	306.23	154630000000	34.1053	34.3226	34.0476	34.147	34.0511	34.2123
	0.062327	0.0224762	F1PHN5	F1PHN5			F1PHN5				GPRC5A	3	12	3	3	11.5	11.5	11.5	40.112	0	21.627	32752000000	31.976	31.8478	31.8953	32.1504	31.7403	31.8957
	0.642997	0.188134	F1PHY9	F1PHY9			F1PHY9				IGSF9	2	15	2	2	2.5	2.5	2.5	126.66	0	18.135	9472400000	29.8931	30.2976	29.9192	30.1965	30.2164	30.2613
	0.701546	0.24375	F1PHZ1;F1PKX9	F1PHZ1;F1PKX9			F1PHZ1				PLXNA2	16	95	19	19	13.1	13.1	11.4	220.57	0	140.1	119250000000	33.4389	33.6814	33.7394	33.611	34.0348	33.9453
	1.43583	-0.849468	F1PIB4	F1PIB4			F1PIB4				LRP2	5	17	5	5	1.4	1.4	1.4	510.1	0	30.748	18693000000	31.507	31.4974	31.5755	30.8919	30.1331	31.0064
	1.71485	-0.400181	F1PID1	F1PID1			F1PID1				SLC9A1	3	11	3	3	4.9	4.9	4.9	90.968	0	19.336	25497000000	31.5695	31.6916	31.6871	31.2629	31.0735	31.4113
	0.0730826	0.0222117	F1PID4;J9P7C6;Q52S86	F1PID4;J9P7C6;Q52S86			F1PID4				PODXL	16	339	16	16	21.2	21.2	21.2	57.268	0	311.5	3897000000000	38.7079	38.755	38.9395	38.6651	38.8816	38.9223
	1.72832	0.299759	F1PID8;E2RJ60	F1PID8;E2RJ60			F1PID8				DDX17	22	273	32	32	42.9	42.9	31.9	81.048	0	312.25	884890000000	36.455	36.2983	36.5309	36.652	36.7719	36.7596
	0.0921019	-0.0830917	F1PIF2	F1PIF2			F1PIF2				CTSZ	2	16	2	2	8	8	8	29.288	0	19.404	21499000000	31.0894	31.0686	31.5694	31.3835	30.6087	31.486
	1.32098	0.147837	F1PIG0	F1PIG0			F1PIG0				TGFBR3	6	22	6	6	9.9	9.9	9.9	94.215	0	40.803	35062000000	31.7669	31.759	31.8208	32.0253	31.8651	31.8999
	0.562013	-0.162484	J9P9X0;J9NU59;F1PIL9	J9P9X0;J9NU59;F1PIL9			J9P9X0				IL1RAP	2	6	2	2	3.8	3.8	3.8	60.067	0	11.539	13613000000	30.8596	30.715	30.6108	30.6407	30.3566	30.7007
	1.27089	0.269143	F1PIQ9;O18735;F1PAC5;J9P025;E2R7P5;E2RHY5;J9P9H9	F1PIQ9;O18735			F1PIQ9				ERBB2	31	307	34	34	31.4	31.4	29.2	138.18	0	315.27	1217500000000	36.8751	36.8853	37.0258	37.0247	37.279	37.29
	0.910352	-0.562396	F1PIT4	F1PIT4			F1PIT4				CD63	2	5	2	2	9.7	9.7	9.7	25.614	0.0014025	11.265	19428000000	31.6394	31.2801	31.3667	30.6358	30.5639	31.3993
	0.536538	0.407358	F1PIT7	F1PIT7			F1PIT7				TMX4	2	7	2	2	8.5	8.5	8.5	33.468	0	12.151	7195300000	29.3637	29.029	30.1453	30.0071	29.9277	29.8252
	0.0715824	-0.0431163	F1PIX5	F1PIX5			F1PIX5				TMX3	4	8	4	4	14.1	14.1	14.1	51.513	0	27.498	15587000000	30.7829	31.2827	30.5924	30.86	30.9131	30.7555
	1.82872	0.698273	F1PJ05;E2RJ19	F1PJ05			F1PJ05				CNNM4	15	88	16	16	25.7	25.7	24.6	86.577	0	116.49	139430000000	33.354	33.4653	33.7446	34.3937	34.2865	33.9785
	0.559405	-1.01499	F1PJ84	F1PJ84			F1PJ84				MUC20	2	7	2	2	5.7	5.7	5.7	54.216	0	13.805	13909000000	31.3357	31.3261	31.0365	31.0664	28.6212	30.9657
	0.118567	-0.0215302	F1PJN2;F1PNT0	F1PJN2;F1PNT0			F1PJN2				LSAMP	16	161	16	16	48.8	48.8	48.8	31.656	0	269.91	722610000000	36.3576	36.3373	36.5266	36.3323	36.4261	36.3984
	0.728233	0.245055	F1PJP5	F1PJP5			F1PJP5				STT3A	10	60	10	10	13.6	13.6	13.6	89.552	0	64.426	176030000000	33.9508	34.2198	34.3274	34.4536	34.5694	34.2101
	1.53129	-0.579746	J9NTL4;F1PK94	J9NTL4;F1PK94			J9NTL4				CDH17	10	85	10	10	19.4	19.4	19.4	91.661	0	103.95	147790000000	34.3901	34.3421	34.2178	33.4703	33.6961	34.0444
	0.545805	0.180356	F1PKT2	F1PKT2			F1PKT2				LSR	10	58	10	10	23.4	23.4	23.4	66.213	0	91.668	156920000000	34.2034	33.7751	33.9447	34.0246	34.1506	34.2891
	0.712393	-0.241475	F1PLG2	F1PLG2			F1PLG2				NNT	11	49	11	11	13.9	13.9	13.9	113.89	0	77.139	88367000000	33.4027	33.3539	33.514	32.946	33.4531	33.1471
	2.0517	-0.548777	F1PLR3	F1PLR3			F1PLR3				GPRC5C	4	27	4	4	13.8	13.8	13.8	48.209	0	30.373	24532000000	31.7054	31.6117	31.8754	31.3123	31.021	31.213
	1.90941	-0.612699	F1PLV2;J9NVL9	F1PLV2;J9NVL9			F1PLV2				PPIB	14	125	14	14	62.5	62.5	62.5	23.775	0	122.37	575060000000	36.1861	36.2716	36.5222	35.8573	35.5236	35.7609
	1.69854	0.151193	J9P5A2;F1PLY1	J9P5A2;F1PLY1			J9P5A2				CELSR1	23	141	23	23	12.6	12.6	12.6	292.48	0	175.2	251120000000	34.7252	34.7646	34.733	34.8207	34.9028	34.9529
	1.24578	0.243145	F1PM26	F1PM26			F1PM26				CD109	30	230	30	30	29.4	29.4	29.4	162.23	0	323.31	340810000000	35.0251	35.106	35.3124	35.3306	35.3987	35.4437
	1.75498	0.317071	F1PM35;J9P3V3	F1PM35			F1PM35				GPC4	10	59	10	10	23.4	23.4	23.4	62.432	0	68.477	121620000000	33.5002	33.6377	33.5727	34.0001	33.7562	33.9056
	1.6682	0.550986	F1PM51;F1Q1M9	F1PM51;F1Q1M9			F1PM51				EPCAM	17	231	17	17	44.9	44.9	44.9	35.357	0	301.14	2739700000000	37.6474	37.9348	38.1632	38.4638	38.4982	38.4364
	0	0.652369	F1PN78;J9P2M7	F1PN78;J9P2M7			F1PN78				EMC1	2	7	2	2	3.5	3.5	3.5	111.78	0	16.89	3125500000	NaN	NaN	28.317	29.3364	29.1742	28.3976
	0.132096	0.239238	F1PNA2	F1PNA2			F1PNA2				ABCC4	3	7	3	3	3	3	3	149.61	0	17.754	16969000000	27.9789	28.2486	29.3339	28.9619	27.7714	29.5458
	0.888843	0.454558	J9NXA9;P38377;F1PNM2;F1PC79	J9NXA9;P38377;F1PNM2;F1PC79			J9NXA9				SEC61A1	9	61	9	9	23.5	23.5	23.5	51.867	0	121.28	203420000000	33.956	34.1015	34.6769	34.8521	34.7101	34.5358
	0.949104	0.116706	F1PP33;J9NUT8	F1PP33;J9NUT8			F1PP33				ITGA1	21	175	21	21	17.5	17.5	17.5	130.51	0	191.2	718810000000	36.2296	36.1746	36.3499	36.4032	36.3817	36.3193
	0.605665	0.151944	F1PP71	F1PP71			F1PP71				F11R	13	143	13	13	40.6	40.6	40.6	32.694	0	137.45	856520000000	36.3059	36.4802	36.6812	36.6868	36.5853	36.651
	0.298153	-0.10585	F1PPH0;F1PPD8;F1Q2E3	F1PPH0;F1PPD8;F1Q2E3			F1PPH0				FGFR2	2	6	2	2	3.3	3.3	3.3	79.517	0	12.305	9162000000	30.1449	30.005	30.216	30.2625	29.9653	29.8205
	0.407492	0.187424	F1PPG9;J9P3Z1	F1PPG9;J9P3Z1			F1PPG9				SLC37A4	4	16	4	4	10.7	10.7	10.7	46.292	0	26.13	43507000000	31.9966	31.9999	32.4722	32.1647	32.5572	32.3092
	0.44413	0.123562	F1PPI5	F1PPI5			F1PPI5				SLC1A5	2	9	2	2	5.3	5.3	5.3	57.507	0	13.336	10914000000	30.2333	30.1656	30.2242	30.1791	30.5627	30.2519
	0.366256	0.0517451	F1PPP5;F1PS94	F1PPP5;F1PS94			F1PPP5				NOTCH2	10	57	10	10	6.5	6.5	6.5	247.61	0	102.1	54490000000	32.5503	32.5295	32.4159	32.567	32.4711	32.6127
	0.36113	0.316395	F1PQ05	F1PQ05			F1PQ05				ERBB4	4	9	7	4	7.5	5.3	5.3	140.22	0	24.666	20006000000	31.1062	31.4026	30.2982	31.1204	31.5645	31.0713
	1.82815	0.38353	F1PQ47	F1PQ47			F1PQ47				SPINT1	12	75	12	12	30.1	30.1	30.1	56.377	0	110.03	280550000000	34.5405	34.7857	34.8215	35.133	35.0379	35.1275
	0.014345	0.00675837	F1PQM7	F1PQM7			F1PQM7				CD9	2	33	2	2	11.1	11.1	11.1	22.798	0	27.373	132340000000	33.836	33.7946	33.9193	33.5987	33.8479	34.1236
	0.834437	-0.100608	F1PQT1	F1PQT1			F1PQT1				SCARB1	3	7	3	3	7.9	7.9	7.9	51.662	0	17.582	23961000000	31.5813	31.7164	31.5846	31.4635	31.5378	31.5792
	0.445865	0.071078	F1PR26;J9NW82	F1PR26;J9NW82			F1PR26				PTGFRN	52	843	52	52	53	53	53	97.134	0	323.31	8205100000000	39.7931	39.7587	39.922	39.8727	39.8279	39.9864
	0.279457	-0.0551453	F1PRC5	F1PRC5			F1PRC5				SLC3A2	19	149	19	19	39.6	39.6	39.6	58.545	0	235.56	391420000000	35.417	35.464	35.5088	35.3682	35.3032	35.553
	0.0401506	0.012085	F1PRH1	F1PRH1			F1PRH1				ABCB6	6	21	6	6	8.3	8.3	8.3	107.26	0	43.728	27422000000	31.5516	31.3183	31.6221	31.5608	31.4193	31.5482
	0.705988	0.108237	F1PRQ8;F1PAD5;F1P9P1;F1PXV3;F1PXW8;F1PAD6	F1PRQ8			F1PRQ8				EPHB4	16	91	18	18	25.7	25.7	23.8	108.5	0	154.86	239660000000	34.7026	34.7598	34.6591	34.7139	34.7997	34.9326
	0.216029	0.0870832	P50551;F1PRR4;F1PB84	P50551;F1PRR4			P50551				VASP	7	36	7	7	26.8	26.8	26.8	40.413	0	53.788	82438000000	33.1937	33.1525	32.9735	33.4469	32.9579	33.1761
	0.0308768	0.0375779	F1PRS5	F1PRS5			F1PRS5				ATP13A1	7	15	7	7	7.5	7.5	7.5	133.2	0	44.41	26157000000	31.7707	31.8015	30.9933	30.9514	31.7326	31.9943
	0.417558	0.153413	J9NY13;F1PRY2	J9NY13;F1PRY2			J9NY13				ABCC3	10	35	11	11	10	10	9.4	168.86	0	72.732	56126000000	32.5275	32.3351	32.7048	32.6464	32.4941	32.887
	0.627075	0.157813	F1PSB1	F1PSB1			F1PSB1				SEMA4D	15	108	15	15	20.1	20.1	20.1	107.91	0	173.93	240470000000	34.7179	34.641	34.5117	34.8965	34.8567	34.5907
	0.591293	-0.161907	Q28923;F1PSB7	Q28923;F1PSB7			Q28923				YES1 YES	2	8	4	2	9.3	4.8	4.8	60.299	0	11.596	16434000000	31.1205	30.9773	30.7354	30.7676	30.7072	30.8726
	0.47985	-0.502512	F1PSF0	F1PSF0			F1PSF0				IL1R1	2	7	2	2	4	4	4	65.504	0	11.592	10892000000	30.9492	31.0833	30.9112	NaN	29.9028	31.0547
	1.13792	0.240515	F1PSG1	F1PSG1			F1PSG1				ERMP1	16	107	16	16	23.4	23.4	23.4	99.924	0	129.2	210500000000	34.3674	34.389	34.6093	34.7948	34.5802	34.7122
	1.52679	0.718363	P54832;F1PSG5	P54832;F1PSG5			P54832				PON2	5	45	5	5	24	24	24	39.639	0	45.72	85820000000	33.2171	32.5678	32.6237	33.3954	33.5984	33.5699
	0.976653	0.488221	F1PSK9;J9P6V8;J9JHT5	F1PSK9;J9P6V8;J9JHT5			F1PSK9				NUP210	8	18	8	8	6	6	6	200.59	0	49.211	27361000000	31.4799	31.3591	30.9556	31.7317	32.0619	31.4656
	0.605089	-0.422815	F1PSN8;F1PQY5	F1PSN8;F1PQY5			F1PSN8				ESRP1	2	10	2	2	4.6	4.6	4.6	70.262	0	13.341	5969700000	29.4823	29.0093	29.1111	29.052	28.2217	29.0606
	1.1719	-0.778512	F1PTB2	F1PTB2			F1PTB2				IL6ST	3	8	3	3	5.2	5.2	5.2	94.276	0	20.06	9066700000	30.3733	30.5959	30.3167	30.0151	29.8812	29.0541
	0.0097321	-0.00413767	F1PTE3	F1PTE3			F1PTE3				RAB13	3	10	5	3	26.6	17.2	17.2	22.667	0	19.499	23093000000	31.558	31.3936	31.1457	31.5064	31.2902	31.2882
	1.092	-0.635508	F1PTP6	F1PTP6			F1PTP6				P4HA2	6	16	6	6	15.4	15.4	15.4	60.647	0	41.227	16174000000	31.0892	31.2977	30.8029	30.6631	30.6584	29.9617
	0.48885	-0.0799802	F1PTR3	F1PTR3			F1PTR3				ACSF2	14	110	14	14	34.2	34.2	34.2	67.843	0	160.1	212100000000	34.6381	34.4503	34.6315	34.4294	34.5538	34.4967
	1.00382	-0.146397	F1PTU4	F1PTU4			F1PTU4				PCCB	30	512	30	30	59.2	59.2	59.2	59.976	0	323.31	3283900000000	38.6342	38.6835	38.5496	38.4276	38.4125	38.5879
	0.185594	0.127038	J9P423;F1PTZ7;Q28284	J9P423;F1PTZ7;Q28284			J9P423				CD44	10	72	10	10	33.3	33.3	33.3	39.52	0	104.81	286880000000	34.7932	34.783	35.0155	35.3718	34.5199	35.081
	0.442703	0.0596581	F1PUP2;F1PUN5;F1PTF5;F1PTF3;F1PTF2;F1PVZ9;F1PW00	F1PUP2;F1PUN5			F1PUP2				PTPRM	36	215	36	36	27.8	27.8	27.8	161.39	0	323.31	753740000000	36.4134	36.4462	36.3199	36.4355	36.3871	36.5359
	0.269815	0.163817	F1PUW7	F1PUW7			F1PUW7				SLC1A1	3	29	3	3	8.6	8.6	8.6	56.81	0	37.548	22971000000	31.2303	31.5128	31.431	31.9606	31.5337	31.1712
	0.644791	0.709957	F1PV60	F1PV60			F1PV60				FOLH1	2	5	2	2	3.5	3.5	3.5	78.215	0	12.948	8379000000	28.7528	29.8043	30.4282	30.491	30.1925	30.4317
	0.974142	0.277664	F1PV63	F1PV63			F1PV63				CDCP1	20	150	20	20	28	28	28	92.482	0	138.09	351040000000	34.8903	35.0952	35.3389	35.3268	35.3941	35.4366
	0.209932	0.0641988	F1PV92	F1PV92			F1PV92				CS	7	37	7	7	13.5	13.5	13.5	52.113	0	46.227	67637000000	32.8976	32.7927	33.1437	33.093	32.9009	33.0327
	0.862856	0.295211	F1PVC5	F1PVC5			F1PVC5				ERBB3	11	68	11	11	18.2	18.2	18.2	113.26	0	111.32	63688000000	32.2829	32.806	32.6873	32.8681	32.9185	32.8753
	0.0821287	-0.0393677	F1PVS7	F1PVS7			F1PVS7				PVR	5	27	5	5	18.5	18.5	18.5	43.704	0	49.455	142650000000	34.0154	34.3636	33.9475	33.8496	34.1871	34.1717
	1.26997	0.211994	F1PVX2	F1PVX2			F1PVX2				DCBLD2	13	74	13	13	23.7	23.7	23.7	80.441	0	109.78	169640000000	34.0326	34.1555	34.231	34.4487	34.267	34.3394
	0	NaN	F1PVX5	F1PVX5			F1PVX5				SEL1L	2	10	2	2	4.7	4.7	4.7	88.696	0	15.504	1486000000	NaN	NaN	NaN	29.4067	29.1915	28.1059
	0.290067	-0.0834332	F1PVZ1	F1PVZ1			F1PVZ1				CHRM4	2	9	2	2	7.9	7.9	7.9	52.939	0	13.015	16485000000	31.0753	31.0997	30.9336	30.9205	30.7907	31.147
	0.764033	0.973702	F1PWA9	F1PWA9			F1PWA9				ASAH1	2	8	2	2	6.2	6.2	6.2	41.959	0.0020776	11.002	5727300000	NaN	28.1997	29.4448	29.4753	30.2221	29.6904
	0.740715	0.311532	F1PWC1;E2REV6	F1PWC1;E2REV6			F1PWC1				PTPRG	13	72	13	13	12.4	12.4	12.4	154.7	0	87.486	107620000000	33.1224	33.6121	33.5338	33.5447	33.7045	33.9537
	0.0984776	-0.27541	F1PWE3	F1PWE3			F1PWE3				TM9SF4	4	13	4	4	11.5	11.5	11.5	74.495	0	31.467	18736000000	29.0377	31.436	31.7738	31.2882	29.5266	30.6065
	0.322804	-0.64915	F1PWN2;F6X8D7	F1PWN2;F6X8D7			F1PWN2				SLC2A1	3	9	3	3	3.9	3.9	3.9	54.1	0	19.411	18329000000	31.3097	30.7951	30.9336	31.0454	31.2972	28.7484
	0.0202172	0.0123177	J9NZ75;Q9BEA0;F1PWS8	J9NZ75;Q9BEA0;F1PWS8			J9NZ75				EGF	3	19	3	3	4	4	4	133.81	0	22.004	9919500000	30.1096	30.4199	30.1568	29.8849	30.4413	30.3969
	1.46832	0.14895	F1PWT3	F1PWT3			F1PWT3				DNASE1L1	9	84	9	9	37.3	37.3	37.3	33.36	0	70.347	211290000000	34.5063	34.5106	34.5059	34.7039	34.7033	34.5625
	1.19796	0.400265	F1PWW0	F1PWW0			F1PWW0				FLNA	18	81	20	18	10.5	10.2	10.2	280.66	0	132.16	78533000000	32.5704	32.9143	32.9576	33.3763	33.0369	33.23
	0	0.695028	F1PXK2	F1PXK2			F1PXK2				UNC93B1	2	5	2	2	5.8	5.8	5.8	58.183	0	13.39	3997100000	NaN	NaN	28.7584	29.2871	29.8443	29.229
	0.64828	0.400085	F1PXM2	F1PXM2			F1PXM2				MMP14	9	32	9	9	26.3	26.3	26.3	65.852	0	78.622	53807000000	31.8495	32.6369	32.2831	32.9763	32.5309	32.4625
	0.0295744	-0.0140457	F1PXM6	F1PXM6			F1PXM6				PLXNB3	4	8	4	4	2.8	2.8	2.8	207.13	0	25.093	105690000000	33.656	33.6717	33.2153	33.5412	33.5703	33.3894
	1.98903	0.482132	F1PXU6;J9NY09;E2RPM8;E2R795	F1PXU6			F1PXU6				IGF1R	51	448	51	51	41.2	41.2	41.2	154.89	0	323.31	2167400000000	37.5752	37.6108	37.8612	38.0545	38.2225	38.2165
	0.38266	0.297576	F1PZL5	F1PZL5			F1PZL5				PLOD2	2	9	2	2	4.3	4.3	4.3	87.631	0	14.175	9263900000	NaN	30.2888	29.5041	30.0133	30.2812	30.2875
	0.0562923	0.0874373	F1Q051	F1Q051			F1Q051				KIRREL	3	5	3	3	6	6	6	82.875	0	19.42	5226100000	28.8649	29.3725	29.5238	29.7439	28.3507	29.9288
	0.776761	-0.737553	J9P9D2;F1Q0F2	J9P9D2;F1Q0F2			J9P9D2				SLC31A1	2	5	2	2	16.9	16.9	16.9	19.823	0	13.946	11296000000	30.6974	30.9153	30.8516	30.4567	29.2209	30.574
	0.317657	0.159182	F1Q0S2	F1Q0S2			F1Q0S2				ATP1B3	2	15	2	2	13.5	13.5	13.5	24.95	0	14.991	13083000000	30.1911	30.7852	30.2433	30.5103	30.4676	30.7191
	0.0571397	-0.0931168	J9P046;F1Q129	J9P046;F1Q129			J9P046				COL4A2	3	12	3	3	4.9	4.9	4.9	75.708	0	18.893	27656000000	31.6325	32.2309	30.4204	31.0311	31.3082	31.6651
	0.376759	0.148947	F1Q133;F1Q0F7;Q28247;J9P9L4;F1PH05	F1Q133			F1Q133				COL4A1	4	25	4	4	4.1	4.1	4.1	156.2	0	31.261	31518000000	31.4987	31.7347	31.8479	31.5854	31.9377	32.005
	0.223369	0.166318	F1Q1M8	F1Q1M8			F1Q1M8				HEXB	3	9	3	3	10.8	10.8	10.8	51.92	0	18.816	21362000000	30.8401	30.8057	31.6291	31.0449	31.3136	31.4154
	1.8998	-0.329671	F1Q260	F1Q260			F1Q260				LAMP1	3	17	3	3	8.9	8.9	8.9	44.616	0	20.789	67932000000	33.1439	32.9207	33.1405	32.762	32.6981	32.756
	0.495963	-0.195812	F1Q2Z6	F1Q2Z6			F1Q2Z6				AGRN	20	96	20	20	14.1	14.1	14.1	216.6	0	217.8	101460000000	33.5991	33.7868	33.2641	33.5005	33.3346	33.2274
	0.309206	0.452721	F1Q332	F1Q332			F1Q332				GARS	4	9	4	4	7.2	7.2	7.2	88.94	0	22.958	10651000000	30.6371	28.6653	30.0755	30.1252	30.4708	30.14
	0.0502852	-0.011205	F1Q3A2	F1Q3A2			F1Q3A2				TMPRSS11E	23	198	23	23	52.6	52.6	52.6	47.761	0	323.31	812650000000	36.4058	36.4386	36.5923	36.3834	36.4616	36.5581
	1.19884	0.235228	F1Q3G2	F1Q3G2			F1Q3G2				SLIT3	20	140	20	20	21	21	21	145.16	0	196.26	168520000000	34.0365	34.0779	33.8459	34.335	34.1406	34.1904
	0.719659	0.232885	J9P6J1;F1Q3G6	J9P6J1;F1Q3G6			J9P6J1				MUC1	12	578	12	12	32.4	32.4	32.4	30.934	0	235.32	1708700000000	37.2995	37.4459	37.6816	37.5631	37.6688	37.8938
	0.701042	0.614288	F1Q3W8	F1Q3W8			F1Q3W8				SDHB	7	25	7	7	26.8	26.8	26.8	31.508	0	102.62	44469000000	32.39	31.1365	32.1548	32.633	32.2925	32.5987
	1.12786	0.443659	F1Q439	F1Q439			F1Q439				ITGA3	21	161	21	21	26.2	26.2	26.2	116.73	0	161.03	489390000000	35.3394	35.614	35.5802	36.2388	35.9534	35.6723
	0.150947	-0.0360031	F1Q4C5;F1PX14	F1Q4C5;F1PX14			F1Q4C5				EPHA2	11	67	13	11	16.1	14.2	14.2	108.26	0	79.147	105700000000	33.5326	33.5806	33.6296	33.4224	33.5056	33.7068
	0.42953	-0.0684954	F1Q4K7	F1Q4K7			F1Q4K7				SLITRK4	21	182	21	21	29.5	29.5	29.5	94.503	0	186.82	355300000000	35.417	35.362	35.2797	35.1815	35.371	35.3007
	1.37912	0.5614	P24409;F2Z4P9;J9NUV0	P24409;F2Z4P9;J9NUV0			P24409				RAB10	8	79	9	8	43	43	43	22.569	0	66.794	435690000000	35.0021	35.185	35.5834	35.9104	35.8886	35.6557
	0.532211	0.202634	P38486;F6PME1;E2QYB5	P38486;F6PME1			P38486				LGALS3	21	408	22	22	44.3	44.3	44.3	30.33	0	240.94	5254200000000	38.9707	39.0891	39.2174	39.0786	39.2186	39.5879
	1.2887	-0.637575	F6V1W9	F6V1W9			F6V1W9				TF	8	36	8	8	9.2	9.2	9.2	110.51	0	54.102	65453000000	33.2018	33.0006	33.1125	32.2305	32.2555	32.9162
	0.477584	0.364459	F6V9R9	F6V9R9			F6V9R9				GLG1	5	11	5	5	5.6	5.6	5.6	134.94	0	31.643	13283000000	30.3198	29.8376	30.8331	30.4719	30.5958	31.0161
	1.48291	0.934537	F6X717	F6X717			F6X717				ITGB8	4	25	4	4	6.7	6.7	6.7	86.782	0	25.975	22136000000	30.379	30.1447	31.1057	31.4788	31.4084	31.5459
	0.277872	-0.118975	F6XD36	F6XD36			F6XD36				TMED9	4	43	4	4	19.5	19.5	19.5	27.708	0	197.56	100740000000	33.4323	33.7044	33.6047	33.7208	33.1923	33.4713
	0.0472563	0.0136363	F6XRM5	F6XRM5			F6XRM5				ENPEP	15	104	15	15	18.1	18.1	18.1	109.2	0	127.66	163450000000	34.1621	34.4076	34.2779	34.4328	34.2137	34.2419
	0.182431	0.122299	F6XTD9	F6XTD9			F6XTD9				NUP155	12	50	12	12	14.1	14.1	14.1	155.13	0	106.8	42350000000	32.2894	31.8497	32.5467	32.0793	32.6134	32.36
	0.121112	0.0481339	F6Y3U7	F6Y3U7			F6Y3U7				COL18A1	5	23	5	5	5.7	5.7	5.7	151.63	0	43.665	50586000000	32.3476	32.5748	32.3549	32.7224	32.3605	32.3388
	0.524328	0.531416	F6Y6T8	F6Y6T8			F6Y6T8				PIGR	8	22	8	8	15.1	15.1	15.1	83.194	0	52.313	17730000000	31.1769	30.9559	29.8025	31.3976	30.9457	31.1862
	0.227733	-0.25766	O18835;G1K299	O18835;G1K299			O18835				GUSB	2	7	2	2	3.7	3.7	3.7	74.432	0	14.258	5626100000	29.0306	NaN	30.071	29.5678	29.239	29.0727
	0.678583	0.150196	P62490;J9JHN1	P62490;J9JHN1			P62490				RAB11A RAB11	4	19	5	5	24.5	24.5	20.8	24.393	0	31.534	101690000000	33.2944	33.3097	33.566	33.627	33.5344	33.4592
	1.79981	0.196349	J9NRJ0;F1PHM5;J9NSQ6	J9NRJ0;F1PHM5;J9NSQ6			J9NRJ0				HSPG2	40	176	40	40	13.5	13.5	13.5	467.85	0	323.31	331540000000	35.1478	35.1632	35.039	35.317	35.3616	35.2604
	0.49718	-0.166458	J9NSZ7	J9NSZ7			J9NSZ7				MPZL1	2	9	2	2	8.3	8.3	8.3	35.915	0	25.645	9830900000	30.1451	30.5961	30.3376	30.3049	30.1964	30.0782
	1.66019	0.720007	J9NTA1	J9NTA1			J9NTA1				METTL7A	3	15	3	3	20.4	20.4	20.4	28.05	0	24.05	18263000000	30.5556	NaN	30.6885	31.558	31.3289	31.1393
	0.81076	-0.635342	J9NV57	J9NV57			J9NV57				TM2D2	2	5	2	2	13.1	13.1	13.1	22.925	0	12.916	3378800000	29.3937	29.1058	NaN	28.1671	28.6596	29.0165
	1.36359	-0.289589	J9NVI2	J9NVI2			J9NVI2				BST2	5	37	5	5	16.5	16.5	16.5	20.627	0	40.222	356260000000	35.5921	35.5614	35.3507	35.226	35.0947	35.3147
	0.267184	0.228795	J9NWS8	J9NWS8			J9NWS8				RDH14	4	12	4	4	10.7	10.7	10.7	41.268	0	26.017	19141000000	30.5976	30.6392	31.2882	31.0477	30.6332	31.5305
	0.0572322	0.0228284	J9NZ79	J9NZ79			J9NZ79				SDC4	7	47	7	7	34.7	34.7	34.7	21.94	0	55.916	104250000000	33.5821	33.6477	33.2149	33.5257	33.4459	33.5416
	2.94665	0.425803	J9NZU1;F1PQ46	J9NZU1;F1PQ46			J9NZU1				ANO6	14	81	14	14	17.7	17.7	17.7	106.18	0	110.38	252170000000	34.6205	34.4942	34.6351	34.9598	35.0324	35.035
	0.519078	-0.188353	P49256;J9P396	P49256;J9P396			P49256				LMAN2	3	7	3	3	11	11	11	40.213	0	17.345	17293000000	31.0223	30.9115	31.2045	31.1254	30.7474	30.7005
	1.23248	0.14992	J9P3V6;F1PWJ7	J9P3V6;F1PWJ7			J9P3V6				BCAM	27	344	27	27	44.9	44.9	44.9	67.747	0	323.31	2499000000000	37.916	38.0767	38.057	38.1254	38.2161	38.1581
	0.452784	-0.164813	J9P4L2	J9P4L2			J9P4L2				ERP29	4	17	4	4	13.1	13.1	13.1	41.667	0	25.074	37004000000	32.1191	32.0093	31.9295	31.9229	31.5729	32.0676
	0.294885	-0.174264	J9P4N4	J9P4N4			J9P4N4				CD59	4	22	4	4	18	18	18	15.628	0	37.728	47076000000	32.3359	32.9158	32.1743	32.186	32.258	32.4592
	0.559396	-0.141926	J9P7Y2;F1P7C5	J9P7Y2;F1P7C5			J9P7Y2				ACE2	25	292	25	25	35.2	35.2	35.2	92.845	0	306.22	1570000000000	37.5069	37.4515	37.7772	37.4151	37.3621	37.5327
	0.159585	0.0858142	J9P9A6	J9P9A6			J9P9A6				LHFPL2	2	11	2	2	13.9	13.9	13.9	19.701	0	14.168	64024000000	32.6558	32.6179	33.0049	32.9758	33.0328	32.5274
	0.0228321	-0.0151812	J9PAF7;F1PTY0	J9PAF7;F1PTY0			J9PAF7				SLC4A7	10	44	10	10	12.9	12.9	12.9	126.71	0	80.482	56516000000	32.4192	32.8133	32.7689	32.3929	32.5555	33.0074
	0.0987887	-0.0156377	O46674;J9P2B9;E2RQY6;J9P9P2;E2RRB2	O46674			O46674				ATP2A2	9	52	9	9	13.5	13.5	13.5	109.65	0	112.29	71935000000	32.9401	33.044	33.0645	32.9618	33.0839	32.956
	0.658104	0.101251	P06583;J9P7J0;F1PMF0	P06583;J9P7J0;F1PMF0			P06583				ATP1B1	11	112	11	11	29	29	29	35.239	0	83.584	914070000000	36.6905	36.544	36.7175	36.7424	36.6806	36.8327
	0.719261	-0.0897764	P24643	P24643			P24643				CANX	3	244	24	24	33.7	33.7	5.9	67.603	0	255.99	707720000000	36.3065	36.4579	36.2879	36.2501	36.2349	36.2979
	0.598403	0.255199	P33724;F1PWG1	P33724			P33724				CAV1 CAV	8	84	8	8	47.8	47.8	47.8	20.605	0	66.516	414130000000	35.2836	35.1684	35.7412	35.6789	35.5097	35.7702
	0.134997	0.0674909	P51147	P51147			P51147				RAB5C	4	26	7	4	38.9	24.1	24.1	23.455	0	28.596	57343000000	32.5304	32.1403	32.6974	32.4527	32.6872	32.4307
	1.38168	-0.822708	P61007;J9NWR1;E2QSW2;E2RIA5;E2RC93;F1PWY4	P61007;J9NWR1			P61007				RAB8A MEL RAB8	4	34	6	5	29	23.7	19.8	23.668	0	43.243	70966000000	32.986	33.147	33.4783	32.1555	32.1325	32.855
	1.69476	-0.290114	P62999;F1P7Q4;F1PYQ1;E2RJH1;F1PW88;E2QU83;F1PYF1	P62999;F1P7Q4;F1PYQ1			P62999				RAC1	9	78	10	10	50	50	44.3	21.45	0	67.381	330210000000	35.3502	35.437	35.4918	35.0046	35.2011	35.203
	1.62186	1.23852	P63091;F6Y6T1;J9P7G0	P63091;F6Y6T1;J9P7G0			P63091				GNAS GNAS1	3	8	4	3	12.4	9.6	9.6	45.664	0	18.009	10705000000	28.988	29.0379	30.0536	30.5461	30.5757	30.6732
	0.846774	0.130412	Q004B2;Q004A8;Q004B0;J9P5R8;Q004B1;J9PB47;A1YV64;J9NYC5;E2R9V7;E2R9W0;F1PCZ8	Q004B2;Q004A8;Q004B0;J9P5R8;Q004B1			Q004B2				CEACAM1	13	170	13	13	24.6	24.6	24.6	56.421	0	323.31	490790000000	35.6926	35.7797	35.8654	36.0119	35.8654	35.8517
	0.855626	-0.626415	Q00589	Q00589			Q00589				SLC6A6	4	10	4	4	8.1	8.1	8.1	69.728	0	22.837	64924000000	33.5552	33.6084	33.089	32.4783	32.5091	33.386
	0.46256	-0.236615	Q1W2J9;O46501	Q1W2J9;O46501			Q1W2J9				PRNP	2	15	2	2	7.8	7.8	7.8	27.779	0	32.741	37109000000	32.2556	32.2062	32.264	31.5688	32.1718	32.2754
	1.11165	1.11002	Q5TJE4	Q5TJE4			Q5TJE4				TAPBP	7	18	7	7	21.2	21.2	21.2	47.773	0	43.772	30243000000	31.7752	30.1904	31.1579	31.9756	32.2563	32.2215
	0.288915	-0.0912069	Q6TEQ7;E2RKW9;J9PAF9;J9P1X3	Q6TEQ7			Q6TEQ7				ANXA2 ANX2	22	188	22	22	58.1	58.1	58.1	38.654	0	323.31	759910000000	36.3468	36.5403	36.6303	36.2792	36.3636	36.6009
	0.0404458	0.0295868	Q95KM6;J9NUV1	Q95KM6;J9NUV1			Q95KM6				CLDN2	3	29	3	3	15.2	15.2	15.2	24.502	0	66.136	118040000000	33.563	33.9613	33.1245	33.611	33.6622	33.4645
	1.82706	0.246403	Q9N281;F6XBP8;E2QXQ6	Q9N281;F6XBP8;E2QXQ6			Q9N281				COL17A1 BP180 BPAG2	15	106	15	15	10.6	10.6	10.6	163.07	0	132.34	267900000000	34.8423	34.7288	34.67	35.0585	34.9618	34.96
	1.34691	0.155155	Q9TSX8	Q9TSX8			Q9TSX8				VNN1	3	312	22	22	42	42	7.4	57.431	0	266.31	919300000000	36.6552	36.6645	36.6123	36.8815	36.8114	36.7046
	0.383885	0.0652835	Q9TSZ6	Q9TSZ6			Q9TSZ6					15	102	15	15	18.7	18.7	18.7	97.191	0	100.67	234870000000	34.6305	34.5932	34.6627	34.6649	34.5924	34.8249

## Sheet: 5c. PTEN PI3K AP 4h
Significant	-log(P-value)	Difference	Protein IDs	Majority protein IDs	Protein names	Gene names	Majority protein IDs single	Only identified by site	Reverse	Potential contaminant	Surfaceome	Unique peptides	MS/MS count	Peptides	Razor + unique peptides	Sequence coverage [%]	Unique + razor sequence coverage [%]	Unique sequence coverage [%]	Mol. weight [kDa]	Q-value	Score	Intensity	Intensity Control_1	Intensity Control_2	Intensity Control_3	Intensity SF1670_LY294002_1	Intensity SF1670_LY294002_2	Intensity SF1670_LY294002_3
+	2.85891	-2.06171	F1PSF0	F1PSF0			F1PSF0				IL1R1	2	7	2	2	4	4	4	65.504	0	11.592	10892000000	30.9492	31.0833	30.9112	28.6984	29.1407	30.2238
	0.144274	0.0993557	P16967;A0A0A0MPC0	P16967;A0A0A0MPC0			P16967				SSR1	3	22	3	3	11.9	11.9	11.9	31.976	0	19.672	43986000000	31.8432	32.1405	32.4953	32.1837	32.3343	32.1362
	0.690617	0.40747	F1PWR1;B1H0W0	F1PWR1;B1H0W0			F1PWR1				IGF2R	9	22	9	9	4.8	4.8	4.8	268.61	0	57.694	29928000000	31.3392	31.0938	31.7605	31.8228	31.7878	32.4085
	0.0645469	0.00801659	B6V8E6	B6V8E6			B6V8E6				CTNNB1	8	57	11	8	19.3	14.2	14.2	85.51	0	72.987	86440000000	33.4298	33.4623	33.4995	33.5167	33.4271	32.8321
	1.02777	0.444733	E2QSB5	E2QSB5			E2QSB5				EFNB1	10	80	10	10	35.6	35.6	35.6	34.699	0	118.37	265470000000	34.5897	34.6391	34.3354	35.1506	34.7817	35.1309
	0.57479	-0.404018	E2QSC8	E2QSC8			E2QSC8				TSPAN8	5	32	5	5	25.7	25.7	25.7	25.802	0	93.255	223940000000	34.8328	34.9351	34.8813	34.8735	34.0846	33.9384
	0.264933	0.318882	E2QUR7;E2QUR6	E2QUR7;E2QUR6			E2QUR7				GPNMB	6	48	6	6	13.2	13.2	13.2	61.73	0	56.208	339260000000	34.7655	34.4536	35.1797	34.6094	35.6275	35.4371
	0.00178698	-0.0028108	E2QV61;F1Q3Q2	E2QV61;F1Q3Q2			E2QV61				DAO	7	76	7	7	20.2	20.2	20.2	39.134	0	57.088	818380000000	35.9283	36.0753	36.7672	35.7491	36.7592	36.7866
	0.978841	0.454608	E2QV99;E2QWZ0;L7N093;F1PJA4	E2QV99			E2QV99				ATP8B1	25	141	26	26	26.6	26.6	25.6	143.96	0	213.38	201240000000	34.0766	33.7895	34.0518	34.2151	34.6394	34.5479
	0.177267	-0.138337	E2QWS7	E2QWS7			E2QWS7				OSMR	6	43	6	6	9.9	9.9	9.9	108.98	0	47.725	25631000000	31.2041	31.3328	31.3438	31.5351	30.7754	31.558
	0.64359	0.241372	E2QX93;F6Y4F1	E2QX93			E2QX93				PCDH1	6	50	6	6	6.4	6.4	6.4	132.95	0	52.121	73934000000	32.8054	33.096	32.9097	33.0232	33.3335	33.3846
	0.035793	-0.0115236	E2QXF0;J9NX36;E2QXC4	E2QXF0			E2QXF0				FOLR2	22	399	22	22	58	58	58	29.669	0	271.6	2939600000000	38.1988	38.4703	38.3851	38.3045	38.3752	38.2688
	0.159733	0.201141	E2QXF2	E2QXF2			E2QXF2				LGMN	2	7	2	2	7.2	7.2	7.2	49.456	0	14.189	19286000000	30.6994	30.432	31.5038	30.8117	31.3474	31.4124
	0.798495	-0.325097	E2QXH3	E2QXH3			E2QXH3				TINAGL1	2	8	2	2	4.9	4.9	4.9	52.315	0	12.188	10082000000	30.3477	30.7266	30.4113	30.2863	30.0539	29.7598
	0.205308	0.110423	E2QXI6	E2QXI6			E2QXI6				TPBG	11	146	11	11	32.4	32.4	32.4	45.695	0	160.69	341390000000	34.8411	35.03	35.2142	34.9416	35.3362	35.3445
	0.128825	0.0625916	E2QY54	E2QY54			E2QY54				SSR4	5	26	5	5	36.4	36.4	36.4	18.943	0	34.496	136000000000	33.7341	33.5649	34.0268	33.8291	33.8466	33.8956
	0.241993	-0.324025	E2QY93	E2QY93			E2QY93				NCLN	7	20	7	7	16.7	16.7	16.7	63.1	0	65.305	21934000000	31.4055	31.5847	30.5935	30.4283	31.3128	31.0624
	0.324672	-0.197184	E2QYL0	E2QYL0			E2QYL0				TMED10	5	49	5	5	22.3	22.3	22.3	25.226	0	45.846	208400000000	34.496	34.5003	34.9277	34.2363	34.652	34.1857
	0.606274	-0.245857	P25473;E2QYU2	P25473;E2QYU2			P25473				CLU	19	164	20	20	39.1	39.1	36.4	51.789	0	323.31	519190000000	35.8103	35.9729	36.1701	35.8821	35.5951	35.5377
	0.81959	-0.34339	E2QZA8	E2QZA8			E2QZA8				FKBP10	4	13	4	4	9.3	9.3	9.3	64.353	0	27.005	20845000000	31.4964	31.7579	31.5033	31.4315	31.0535	30.7403
	0.247436	0.322116	E2QZH1	E2QZH1			E2QZH1				TSPAN14	2	9	2	2	7.8	7.8	7.8	30.631	0	13.949	13146000000	29.6524	29.6014	30.7046	30.057	30.5595	30.9703
	1.3668	-0.177668	E2QZT4	E2QZT4			E2QZT4				BSG	13	166	13	13	49.3	49.3	49.3	29.302	0	185.04	1326700000000	37.223	37.287	37.3049	37.0382	37.1497	37.2708
	0.437328	0.412368	E2QZY0	E2QZY0			E2QZY0				NTN4	6	17	6	6	16.2	16.2	16.2	69.84	0	39.038	51336000000	31.6559	32.3051	32.0588	32.0154	32.8225	32.8042
	0.112235	-0.0538184	E2R0Y5	E2R0Y5			E2R0Y5				SUCLG1	6	47	6	6	22.8	22.8	22.8	36.109	0	97.527	137390000000	33.8597	34.1616	34.1787	34.1536	33.8722	33.8254
	0.577527	-0.36148	E2R0Z0;E2R858;J9NXY3;E2R971	E2R0Z0			E2R0Z0				CDH6	22	284	22	22	32.2	32.2	32.2	88.65	0	229.07	1486900000000	37.5592	37.0752	37.6712	37.2324	36.9151	37.0502
	0.687744	-0.336219	E2R1N7	E2R1N7			E2R1N7				PCYOX1	3	15	3	3	8.5	8.5	8.5	56.704	0	21.328	14002000000	30.9235	30.7951	30.8917	30.8055	30.2623	30.6848
	0.124091	-0.015405	E2R2V6	E2R2V6			E2R2V6				L1CAM	45	588	45	45	38.5	38.5	38.5	140.05	0	323.31	3521100000000	38.5247	38.6347	38.5628	38.538	38.5793	38.6071
	0.136873	0.093696	E2R2Z8;F1PKF1	E2R2Z8;F1PKF1			E2R2Z8				TMEM30A	4	26	5	5	16.9	16.9	14.7	40.691	0	34.334	27149000000	31.2617	31.6031	31.8572	31.5244	31.811	31.4669
	0.758103	0.501136	E2R3X4;Q28269;F1PZF7;J9P475	E2R3X4;Q28269;F1PZF7			E2R3X4				OCLN	5	19	5	5	16.9	16.9	16.9	59.16	0	46.099	16848000000	30.2597	30.413	30.1515	30.4199	31.1319	31.4552
	0.12554	0.0378424	E2R4C1	E2R4C1			E2R4C1				M6PR	4	30	4	4	13.1	13.1	13.1	43.246	0	29.897	58932000000	32.6571	32.62	32.7056	32.837	32.5605	32.3415
	0.0258005	0.0283178	E2R4F0;J9P8K7	E2R4F0			E2R4F0				CELSR2	12	48	12	12	6.2	6.2	6.2	317.63	0	78.924	47024000000	31.7883	32.4348	32.5334	32.0159	32.5451	32.3618
	1.006	0.434295	E2R4Q1;J9P315	E2R4Q1;J9P315			E2R4Q1				LRP1	14	46	14	14	4.2	4.2	4.2	502.76	0	93.244	48794000000	31.9027	32.3339	32.1963	32.6881	32.4691	32.5757
	0.0905887	0.030405	E2R4T7;E2R4T5	E2R4T7;E2R4T5			E2R4T7				HSD17B4	14	97	14	14	26.3	26.3	26.3	79.689	0	121.33	212970000000	34.4935	34.4337	34.674	34.4694	34.6589	34.4777
	0.140345	-0.0282459	J9P4T2;E2R508;J9P001;J9NZY6;J9PAG8;F1PN80;F1PWX4	J9P4T2;E2R508;J9P001			J9P4T2				ADAM9	21	146	21	21	36.9	36.9	36.9	72.143	0	191.82	369500000000	35.3486	35.4539	35.3922	35.4521	35.288	35.2468
	1.59772	-0.318862	E2R5Z5	E2R5Z5			E2R5Z5				TM9SF2	5	33	5	5	7.7	7.7	7.7	75.641	0	37.429	54521000000	32.8762	32.9444	33.0635	32.6026	32.6823	32.5866
	0.322672	0.16448	E2R6A6	E2R6A6			E2R6A6				EPHA1	7	22	7	7	10.2	10.2	10.2	107.48	0	43.218	36360000000	31.8463	32.0067	32.3713	32.2036	32.2749	32.053
	0.276019	0.254654	F1P7K9;E2R6B8;F1PFW3	F1P7K9;E2R6B8;F1PFW3			F1P7K9				CA14	3	17	3	3	9.2	9.2	9.2	37.472	0	18.949	73004000000	32.6252	32.2922	32.8594	32.4581	33.2358	33.267
	0.858601	-0.514477	E2R6Q7	E2R6Q7			E2R6Q7				CTSB	10	99	10	10	34.8	34.8	34.8	37.685	0	95.899	342200000000	35.3349	35.6189	35.9105	35.2955	34.9184	35.3147
	0.0552186	-0.0399872	J9P8P9;E2R7S1;F1PHQ7;E2R4W3;J9PB54;E2RF35	J9P8P9;E2R7S1;F1PHQ7;E2R4W3			J9P8P9				ATP2B1	5	27	5	5	6.7	6.7	6.7	129.49	0	32.295	25720000000	31.6271	31.8919	31.397	31.8143	31.3831	31.0854
	1.03634	0.842813	E2R7S5	E2R7S5			E2R7S5				RSL1D1	3	13	3	3	6.7	6.7	6.7	54.91	0	18.607	14242000000	29.9894	29.5283	29.8214	30.2235	31.0215	30.9203
	1.02657	-0.494383	E2R925;J9P0R7	E2R925;J9P0R7			E2R925				RTN4	3	26	3	3	4.5	4.5	4.5	129.34	0	32.461	72940000000	33.1638	33.4384	33.446	33.0769	32.6332	32.8299
	0.227876	0.0930932	E2R948	E2R948			E2R948				VDAC2	17	267	18	18	64.6	64.6	64.6	31.578	0	323.31	1764100000000	37.39	37.6497	37.7555	37.601	37.782	37.4465
	0.473432	0.393912	E2R949	E2R949			E2R949				SLC44A1	5	29	5	5	10	10	10	73.204	0	38.746	96513000000	32.6835	33.5289	33.3796	33.4892	33.6933	33.2552
	1.50995	0.511131	E2R9T1	E2R9T1			E2R9T1				SLC5A6	4	22	4	4	7.1	7.1	7.1	69.3	0	31.892	69306000000	32.2084	32.3329	32.1876	32.5943	32.9139	33.1232
	0.153956	-0.0719118	E2RB31	E2RB31			E2RB31				HYOU1	7	33	7	7	12.3	12.3	12.3	111.43	0	54.055	22650000000	31.4285	31.3012	31.5767	31.1811	31.546	31.8612
	0.648922	0.225662	E2RB35	E2RB35			E2RB35				FLRT2	9	44	9	9	18.6	18.6	18.6	73.834	0	67.656	95091000000	33.084	33.3041	33.2796	33.2907	33.6058	33.8755
	0.430312	0.480434	J9P351;E2RB44	J9P351;E2RB44			J9P351				SLC5A9	3	9	3	3	6.9	6.9	6.9	64.909	0	18.89	14568000000	30.6332	30.3787	29.8199	31.21	30.3054	30.3145
	0.987968	-0.338095	E2RBD3	E2RBD3			E2RBD3				IGSF5	2	5	2	2	7.8	7.8	7.8	39.713	0	17.977	25329000000	31.7947	31.8987	31.5535	31.3286	31.4931	31.2685
	0.690818	0.145789	E2RBL9	E2RBL9			E2RBL9				ITGB6	26	391	26	26	38	38	38	88.344	0	323.31	2889300000000	38.4725	38.2952	38.2501	38.5129	38.4572	38.1043
	0.0517158	0.037173	E2RC10	E2RC10			E2RC10				SYPL1	5	28	5	5	28.9	28.9	28.9	24.518	0	39.501	146250000000	33.7946	33.9027	34.1768	33.7369	34.2536	34.159
	0.437196	0.538572	E2RCD7	E2RCD7			E2RCD7				MRPL2	2	5	2	2	11.4	11.4	11.4	33.029	0	11.934	9500600000	30.1112	29.2323	29.1043	30.4222	29.6201	30.8016
	0.419049	-0.163493	E2RD92	E2RD92			E2RD92				MLEC	3	21	3	3	14.9	14.9	14.9	32.064	0	23.144	25983000000	31.6418	31.4941	31.9023	31.4599	31.572	31.1442
	0.0823229	0.0358798	E2RE57	E2RE57			E2RE57				ENTPD3	10	81	10	10	22.9	22.9	22.9	59.243	0	148.13	265000000000	34.867	34.5992	34.921	34.7255	34.9377	34.9033
	0.471532	0.127133	E2RE80;E2RE81	E2RE80;E2RE81			E2RE80				PTPRF	51	394	56	56	40.5	40.5	36.9	210.83	0	323.31	923590000000	36.5846	36.6803	36.3867	36.6831	36.6723	36.9191
	0.181772	0.0571804	E2REA9	E2REA9			E2REA9				ITGA2	54	865	54	54	43.7	43.7	43.7	129.67	0	323.31	7610100000000	39.6202	39.7172	39.7319	39.6025	39.8914	39.721
	1.08852	0.436784	E2REV2	E2REV2			E2REV2				CDH16	16	149	16	16	27	27	27	90.032	0	202.75	501190000000	35.7265	35.3231	35.6994	35.9947	36.0449	35.8548
	0.574264	0.356747	E2RF18	E2RF18			E2RF18				CYB5R1	7	29	7	7	25.2	25.2	25.2	33.943	0	41.938	48590000000	32.4909	32.1463	31.9933	32.809	32.3248	32.5287
	1.00895	0.198036	E2RF90	E2RF90			E2RF90				CD74	4	43	4	4	13.1	13.1	13.1	33.564	0	61.524	126390000000	33.7744	33.5938	33.7963	33.9318	33.9072	33.8749
	0.425106	0.188262	J9P3K8;E2RFD0	J9P3K8;E2RFD0			J9P3K8				HMGCL	11	148	11	11	45.1	45.1	45.1	26.878	0	241.94	450540000000	35.6645	35.491	35.5802	35.9943	35.5394	35.3041
	0.881928	-0.217218	E2RG27;E2RG59	E2RG27;E2RG59			E2RG27				KTN1	38	206	38	38	32.6	32.6	32.6	156.56	0	323.31	413070000000	35.5067	35.615	35.7829	35.4423	35.3929	35.4332
	0.267408	0.0638847	E2RG47	E2RG47			E2RG47				STT3B	6	33	6	6	9.6	9.6	9.6	93.67	0	45.779	56710000000	32.5152	32.5905	32.6454	32.5418	32.7534	32.7706
	0.101202	0.123294	E2RGN0	E2RGN0			E2RGN0				PLAUR	3	32	3	3	15.7	15.7	15.7	26.025	0	29.078	45540000000	31.6704	32.795	32.3051	32.4899	32.2703	31.9892
	0.184553	0.472428	E2RGR9	E2RGR9			E2RGR9				FH	3	15	3	3	11.4	11.4	11.4	54.451	0	25.548	5621900000	NaN	29.8667	29.0493	30.7382	29.1227	28.9034
	0.319177	0.418855	E2RGY9	E2RGY9			E2RGY9				ELOVL1	3	19	3	3	13.7	13.7	13.7	32.539	0	22.879	21326000000	30.0181	31.1085	31.3177	31.2371	31.2301	31.1894
	0.598952	-0.627957	E2RHN1	E2RHN1			E2RHN1				GRN	2	11	2	2	6.3	6.3	6.3	61.98	0	13.443	6307400000	29.3584	30.4314	29.5768	29.3411	28.9806	28.6012
	0.386257	0.376059	E2RHV1	E2RHV1			E2RHV1				SEMA4C	4	7	4	4	5.8	5.8	5.8	92.455	0	24.077	14358000000	30.9515	30.5905	30.2987	31.406	30.5733	29.6462
	0.307257	0.225492	E2RHY7	E2RHY7			E2RHY7				SERPINH1	22	250	22	22	52.2	52.2	52.2	46.582	0	323.31	1468100000000	36.8048	36.986	37.2454	36.9184	37.5567	37.6549
	0.58831	0.341773	E2RIG0	E2RIG0			E2RIG0				NDUFA10	8	42	8	8	30.1	30.1	30.1	39.873	0	63.512	64591000000	32.4759	31.9757	32.5955	32.7091	32.6725	33.1866
	2.41789	-0.306004	J9JHJ2;E2RJ06	J9JHJ2;E2RJ06			J9JHJ2				RPSA LOC106559170	6	47	6	6	24.4	24.4	24.4	32.898	0	48.295	58184000000	33.0022	32.9032	32.9434	32.6374	32.6498	32.4597
	1.05246	0.406228	E2RJ93	E2RJ93			E2RJ93				GLS	7	18	7	7	13.4	13.4	13.4	83.021	0	43.579	35507000000	31.8901	31.5321	31.5082	32.0026	32.0968	31.8363
	0.108884	0.0501086	E2RJT2	E2RJT2			E2RJT2				BST1	12	115	12	12	35.7	35.7	35.7	35.387	0	94.781	616640000000	35.9617	35.889	36.0464	35.8122	36.2194	36.1957
	0.20742	0.0981318	E2RK67	E2RK67			E2RK67				TMX1	6	49	6	6	19.1	19.1	19.1	31.515	0	48.404	192070000000	34.4853	34.0502	34.4044	34.4719	34.351	34.5495
	0.0042155	-0.00538286	E2RK97;F1PYV2	E2RK97			E2RK97				MFSD6	3	8	3	3	6.8	6.8	6.8	87.786	0	18.563	6571200000	29.3432	29.7081	29.3222	28.9475	29.9574	29.5745
	0.0908214	-0.0445207	E2RKK6	E2RKK6			E2RKK6				PRKCSH	2	11	2	2	4.1	4.1	4.1	60.49	0	14.231	11113000000	30.4215	30.1406	30.5948	30.345	30.3372	30.3916
	0.545335	0.778892	E2RKP5	E2RKP5			E2RKP5				HPN	5	24	5	5	16.1	16.1	16.1	44.904	0	43.684	33350000000	31.658	31.7442	30.5056	32.493	31.6701	32.3287
	0.113343	0.0332139	E2RKQ6	E2RKQ6			E2RKQ6				LGALS3BP	8	63	8	8	21.8	21.8	21.8	62.21	0	76.238	98462000000	33.3374	33.29	33.5014	33.325	33.4941	33.3561
	0.243035	-0.253482	E2RKS8	E2RKS8			E2RKS8				PIGO	5	21	5	5	21.1	21.1	21.1	38.57	0	46.412	24156000000	31.5455	31.7487	31.6519	31.9224	30.8681	30.3563
	0.424355	0.111083	E2RKY7	E2RKY7			E2RKY7				FLRT3	16	111	16	16	33.9	33.9	33.9	73.141	0	122.66	228940000000	34.6619	34.7865	34.4997	34.765	34.7559	34.7164
	0.213215	0.0173759	J9NVU0;E2RL88	J9NVU0;E2RL88			J9NVU0				ITGA6	24	145	24	24	31.6	31.6	31.6	119.5	0	323.31	320720000000	35.1779	35.1716	35.2238	35.1785	35.2384	35.1841
	0.0129788	0.00572618	E2RLA2;E2RLB8	E2RLA2;E2RLB8			E2RLA2				P4HA1	4	19	4	4	10.5	10.5	10.5	61.047	0	27.216	28938000000	31.6095	31.6713	31.7136	31.855	31.4861	31.7816
	0.746086	0.176816	E2RLA5	E2RLA5			E2RLA5				GOLM1	2	5	2	2	5.9	5.9	5.9	45.582	0	12.346	3992600000	28.6455	28.6891	28.796	28.9988	28.7752	29.0433
	0.173555	0.0594565	E2RM56	E2RM56			E2RM56				PLXNB1	17	96	17	17	12.4	12.4	12.4	232.9	0	201.4	179420000000	34.3445	34.4608	34.1447	34.4333	34.319	34.2518
	0.349506	0.551153	E2RMA6	E2RMA6			E2RMA6				SLC39A6	2	8	2	2	3.1	3.1	3.1	82.622	0	12.428	6962700000	28.6055	29.7594	NaN	29.8442	29.623	29.8736
	0.314759	0.134221	E2RMC0	E2RMC0			E2RMC0				ITPR3	12	47	12	12	6.9	6.9	6.9	303.7	0	82.937	50500000000	32.454	32.5566	32.1236	32.5054	32.5192	32.5403
	0.301306	0.116594	E2RMT2;F1PHH3	E2RMT2;F1PHH3			E2RMT2				PTK7	35	481	35	35	41.5	41.5	41.5	118.42	0	323.31	2229400000000	37.6641	37.9811	38.0256	37.9529	38.0608	37.873
	0.186306	-0.14861	E2RN10	E2RN10			E2RN10				B2M	3	23	3	3	18.4	18.4	18.4	14.263	0	26.24	75748000000	32.9389	33.1316	33.1457	33.3047	32.5422	33.3535
	1.50332	0.26561	E2RNQ5	E2RNQ5			E2RNQ5				DHCR7	5	26	5	5	10.5	10.5	10.5	54.394	0	32.722	48763000000	32.3457	32.2384	32.3794	32.6437	32.5299	32.4318
	0.720971	0.444573	E2RP67;J9P0C6	E2RP67			E2RP67				TBL2	5	33	5	5	16.4	16.4	16.4	49.991	0	42.893	31095000000	31.3387	31.5661	31.8479	31.7841	32.2735	31.9694
	0.152401	-0.0507965	J9P4E7;E2RPA8	J9P4E7;E2RPA8			J9P4E7				CD151	4	21	4	4	15.7	15.7	15.7	29.236	0	24.703	144430000000	34.0698	33.7969	33.8671	33.9411	33.7799	34.1801
	5.24671e-06	3.8147e-06	E2RPE9	E2RPE9			E2RPE9				APMAP	4	28	4	4	12.3	12.3	12.3	46.282	0	29.387	37048000000	32.4525	31.8764	32.2872	32.3001	32.1107	32.0936
	0.0465051	-0.0101795	E2RPP1	E2RPP1			E2RPP1				LAMA3	19	91	20	20	7.2	7.2	6.8	367.68	0	141.66	161800000000	34.1918	34.2835	34.2956	34.1663	34.3272	34.0212
	0.160161	0.106735	E2RQ08	E2RQ08			E2RQ08				RPN1	33	271	33	33	61.3	61.3	61.3	68.576	0	323.31	814850000000	36.1206	36.1799	36.5647	36.1734	36.617	36.5655
	1.49582	-0.519835	F5C3N2;E2RQ25;F6M3K2	F5C3N2;E2RQ25			F5C3N2				MME	6	15	6	6	11.3	11.3	11.3	85.549	0	38.973	26398000000	31.9366	31.903	31.6133	31.3427	31.2529	30.5842
	0.702679	0.862334	J9NVV3;E2RQC7	J9NVV3;E2RQC7			J9NVV3				LMF2	2	13	2	2	5.6	5.6	5.6	70.695	0	15.671	20082000000	30.8805	29.7805	31.0882	31.4554	31.4354	31.2437
	0.466187	-0.638994	J9P5W3;E2RRH2	J9P5W3;E2RRH2			J9P5W3				MAGT1	5	26	5	5	17.5	17.5	17.5	36.165	0	32.219	70215000000	33.2179	33.0796	33.3183	33.3176	31.8149	32.4046
	0.53457	0.281767	E2RS95	E2RS95			E2RS95				TM7SF2	4	15	4	4	11.7	11.7	11.7	46.625	0	24.832	33583000000	31.484	31.6076	31.6182	32.1386	31.5648	32.1135
	0.102257	-0.0687561	E2RSD0	E2RSD0			E2RSD0				TM9SF3	5	40	5	5	8.5	8.5	8.5	67.542	0	38.174	100710000000	33.3941	33.3867	33.8434	33.293	33.6522	33.3746
	0.0665885	0.0528205	E2RSW3	E2RSW3			E2RSW3				FRRS1	4	9	4	4	8.1	8.1	8.1	65.786	0	24.825	23960000000	31.0003	31.4671	31.6817	31.3325	31.5392	31.1799
	0.130447	-0.018788	E2RT60	E2RT60			E2RT60				ITGB1	38	1127	38	38	40.6	40.6	40.6	88.123	0	323.31	6744500000000	39.4819	39.5329	39.6111	39.5472	39.4991	39.5946
	0.797379	0.199273	E2RTD2	E2RTD2			E2RTD2				SLC33A1	3	6	3	3	6.7	6.7	6.7	60.737	0	16.626	13611000000	30.5423	30.4162	30.4123	30.5332	30.7793	30.7816
	0.200575	0.0571874	J9P735;F1P6D7	J9P735;F1P6D7			J9P735				CD47	5	63	5	5	18.2	18.2	18.2	33.15	0	58.481	124990000000	33.652	33.9232	33.7125	33.8013	33.8383	32.8794
	0.634505	0.316937	F1P6G0;E2R0M2	F1P6G0			F1P6G0				PLXNA1	8	28	10	9	6.6	6.1	5.3	211.66	0	52.479	36322000000	31.8327	31.9691	31.4348	31.9998	32.1251	32.0821
	0.921141	0.168287	F1P6Z9;F1P7M7;F1P702	F1P6Z9;F1P7M7;F1P702			F1P6Z9				CADM1	13	107	13	13	47	47	47	44.494	0	245.15	392170000000	35.4069	35.4687	35.2961	35.6164	35.5013	34.9178
	0.00293714	0.00133896	F1P7R0;F1P7Q7	F1P7R0;F1P7Q7			F1P7R0				FAS	2	14	2	2	11.9	11.9	11.9	35.431	0	19.266	31267000000	31.9778	31.9452	31.696	31.7535	31.9953	31.2899
	0.00320659	0.00116603	F1P8N6;P41148	F1P8N6;P41148			F1P8N6				HSP90B1	23	178	25	25	33.5	33.5	31.8	92.384	0	232.5	484410000000	35.6855	35.6028	35.8235	35.5956	35.8146	35.8518
	0.484443	0.102472	F1P8Q0	F1P8Q0			F1P8Q0				ITGAV	55	1155	55	55	51.9	51.9	51.9	112.53	0	323.31	10368000000000	39.9907	40.0981	40.0952	40.0631	40.2645	40.2336
	0.443138	0.140053	F1P8R0	F1P8R0			F1P8R0				STEAP3	8	40	8	8	16.5	16.5	16.5	57.772	0	58.62	78947000000	32.9156	33.2164	32.9412	33.2158	33.1131	32.9693
	1.22256	-0.493599	F1P8Z5	F1P8Z5			F1P8Z5				APOB	3	10	5	3	1.4	0.8	0.8	501.53	0	18.188	26384000000	31.802	31.7264	31.9654	31.1495	31.5257	31.5574
	0.147638	-0.0542132	F1P983;J9NUR9	F1P983;J9NUR9			F1P983				PTPRJ	23	190	23	23	24.5	24.5	24.5	135.85	0	247.94	641100000000	36.0185	36.0498	36.2381	36.1819	35.914	36.2414
	1.47681	0.19574	F1P984	F1P984			F1P984				SPINT2	3	34	3	3	16.7	16.7	16.7	28.053	0	40.69	51759000000	32.4171	32.5309	32.544	32.6853	32.7008	32.193
	0.473668	0.0859623	F1P992;J9P8H0	F1P992;J9P8H0			F1P992				CXADR	22	195	22	22	63.7	63.7	63.7	39.487	0	228.42	692200000000	36.1951	36.1095	36.2213	36.179	36.3435	36.3729
	0.11317	0.073952	F1P9I9	F1P9I9			F1P9I9				CTSA	2	21	2	2	5.2	5.2	5.2	56.524	0	14.44	13436000000	30.5122	30.5945	30.7315	30.9773	30.3961	30.5123
	0.580515	-0.0654011	F1P9K1	F1P9K1			F1P9K1				IGSF3	41	328	41	41	45.3	45.3	45.3	134.1	0	323.31	1221600000000	37.1078	37.1384	37.136	37.1235	37.0005	36.9145
	0.0625152	-0.00256729	F1P9S5;J9NRH0	F1P9S5			F1P9S5				PLXNB2	63	734	63	63	38.2	38.2	38.2	205.04	0	323.31	3580800000000	38.6904	38.6681	38.6666	38.6593	38.6857	38.4952
	0.694571	-0.167568	F1P9T5	F1P9T5			F1P9T5				FKBP11	2	9	2	2	13.7	13.7	13.7	22.582	0	12.326	8832400000	30.2853	30.0643	30.1482	30.0797	29.917	30.1274
	0.109917	-0.062109	F1P9U5	F1P9U5			F1P9U5				SLC44A4	7	65	7	7	10.5	10.5	10.5	78.876	0	74.228	381890000000	35.3973	35.1327	35.6144	35.2021	35.4366	35.3655
	0.968579	0.52129	Q8WMU5;F1P9V1	Q8WMU5;F1P9V1			Q8WMU5				FZD6	5	27	5	5	9.1	9.1	9.1	80.179	0	32.016	51609000000	32.4265	32.0055	32.562	32.7509	32.9544	32.2245
	0.91835	-0.442497	F1P9W5	F1P9W5			F1P9W5				SLC12A2	12	65	12	12	16.3	16.3	16.3	110.53	0	109.89	212940000000	34.8312	35.072	34.7687	34.673	34.2232	34.1586
	0.705677	0.367278	F1P9X6;F1P9X5	F1P9X6;F1P9X5			F1P9X6				SEMA4B	12	66	12	12	21	21	21	92.366	0	100.95	164650000000	33.6966	33.764	33.9802	33.9222	34.4395	34.3729
	0.856119	0.623231	F1PA89	F1PA89			F1PA89				SLC39A10	3	18	3	3	7.7	7.7	7.7	55.012	0	22.771	16557000000	30.6713	29.8864	30.5206	30.9475	31.0178	30.9947
	0.756415	0.432749	F1PAA3	F1PAA3			F1PAA3				CDH3	3	8	3	3	5.4	5.4	5.4	91.153	0	18.058	14688000000	30.7166	30.868	30.2474	30.9874	31.0995	29.703
	0.422015	0.106239	F1PAA4;F1PAA9	F1PAA4;F1PAA9			F1PAA4				CDH1	17	215	17	17	21.8	21.8	21.8	91.483	0	239.11	966090000000	36.6864	36.724	36.5965	36.8969	36.6534	36.7748
	1.14476	0.340834	F1PAF1;F1PNA5;E2R7J5;F1PRX7;F1PRX3;E2RMF7;F1P925;F1PYW2	F1PAF1			F1PAF1				EPHB2	12	61	14	12	19.5	17.5	17.5	107.44	0	99.939	88773000000	33.2187	33.1198	32.9248	33.3539	33.5033	33.2955
	0.749139	0.118907	F1PAL6;J9P7G3	F1PAL6;J9P7G3			F1PAL6				DDO	4	25	4	4	19.4	19.4	19.4	36.807	0	43.982	21451000000	31.2632	31.1431	31.3063	31.3226	31.3903	31.1732
	0.460345	0.230142	F1PAM6;J9P1R3	F1PAM6;J9P1R3			F1PAM6				SLC27A4	2	5	2	2	5.1	5.1	5.1	72.06	0	11.591	4986200000	28.5949	29.0835	28.8201	28.9326	29.1933	28.5213
	0.907791	-0.246651	F1PAR8;J9P0Q7;J9P9X2	F1PAR8;J9P0Q7			F1PAR8				PHB	12	63	12	12	43.5	43.5	43.5	29.723	0	90.717	342980000000	35.466	35.4902	35.5614	35.4069	35.1116	34.8697
	1.45131	-0.305595	F1PAX2;ENSEMBL:ENSBTAP00000031900;CON__ENSEMBL:ENSBTAP00000031900	F1PAX2			F1PAX2				CP	21	173	21	21	25.8	25.8	25.8	122.56	0	226.34	463680000000	35.5885	35.7515	35.8022	35.3975	35.4195	35.7311
	0.274587	-0.0821431	F1PB95	F1PB95			F1PB95				ICAM1	3	491	27	27	36.7	36.7	7	58.123	0	264.11	2568800000000	38.0952	38.1531	38.1623	37.9028	38.2067	38.2997
	1.59593	0.345538	J9NZA9;F1PBA1;P50997;F1P767;F1PJF0;F1PRH6;J9P483;P50996	J9NZA9;F1PBA1;P50997			J9NZA9				ATP1A1	24	332	39	39	41.6	41.6	23.9	112.81	0	323.31	1737300000000	37.3881	37.2948	37.2749	37.7586	37.571	37.5611
	0.272596	0.156751	F1PC23	F1PC23			F1PC23				SLC39A4	11	222	11	11	20.6	20.6	20.6	62.716	0	311.05	1224600000000	36.7608	36.8194	36.9335	36.7078	37.2816	37.1246
	0.515948	0.167857	F1PC58;J9JHD4	F1PC58;J9JHD4			F1PC58				ACAT1	9	94	9	9	35.6	35.6	35.6	43.989	0	121.47	96854000000	33.4181	33.3889	33.6442	33.7688	33.5344	32.8687
	0.0470271	0.0372391	F1PCD8	F1PCD8			F1PCD8				LAMB1	12	79	12	12	11.6	11.6	11.6	181.93	0	151.88	75237000000	33.0808	33.0459	32.8033	32.6912	33.3366	33.0795
	0.208767	-0.0457293	J9P280;F1PCM5	J9P280;F1PCM5			J9P280				TMEM8A	2	13	2	2	4	4	4	83.286	0	19.893	14116000000	30.5578	30.4981	30.7075	30.5674	30.5167	30.8061
	0.232595	-0.136484	F1PCQ3	F1PCQ3			F1PCQ3				SLC16A1	16	117	16	16	26.5	26.5	26.5	53.747	0	144.65	442480000000	35.4386	35.9062	35.8758	35.456	35.7515	35.5562
	0.0759287	-0.0586535	F1PDP5	F1PDP5			F1PDP5				CD276	5	29	5	5	17.8	17.8	17.8	57.05	0	30.576	62546000000	32.8755	32.517	33.005	32.4888	32.9923	32.7723
	1.09193	0.429106	F1PEF0	F1PEF0			F1PEF0				DSC3	14	67	16	14	26.5	23.9	23.9	97.607	0	123.47	130170000000	33.4537	33.6392	33.4221	33.7455	34.1227	33.8274
	0.610934	0.189764	F1PEF1;J9P6A9	F1PEF1;J9P6A9			F1PEF1				DSC2	34	285	36	36	45.7	45.7	43.2	100.82	0	323.31	1086200000000	36.5581	36.7918	36.8939	36.8984	36.977	36.7737
	1.72317	0.344388	Q9GLD3;F1PEN6	Q9GLD3;F1PEN6			Q9GLD3				TFRC	9	37	9	9	15.8	15.8	15.8	86.648	0	83.916	58644000000	32.2544	32.3937	32.3551	32.6097	32.7478	32.9983
	0.0564935	-0.0128091	F1PF03	F1PF03			F1PF03				EGFR	18	126	19	18	20.8	19.7	19.7	131.53	0	145.5	282450000000	35.016	35.0759	35.1127	35.146	34.9647	34.8252
	0	1.7099	F1PF09	F1PF09			F1PF09				PMPCA	2	11	2	2	5.3	5.3	5.3	58.569	0	33.29	4736500000	NaN	NaN	28.5095	NaN	30.2194	29.7606
	0.966004	1.20836	F1PF63;J9P9X5	F1PF63;J9P9X5			F1PF63				ST14	11	56	11	11	18.5	18.5	18.5	92.141	0	93.307	145640000000	32.391	33.6844	33.4433	34.1864	34.5761	34.2074
	1.18324	-0.169741	F1PFD6;F1PUR3;F1PUQ3	F1PFD6			F1PFD6				TENM4	23	104	23	23	12.3	12.3	12.3	307.73	0	187.24	139080000000	34.0804	34.0651	34.0875	33.9872	33.8286	33.6359
	0.772681	-0.0712757	F1PFM5	F1PFM5			F1PFM5				LAMB3	31	166	31	31	39	39	39	129.32	0	323.31	355300000000	35.4653	35.3733	35.41	35.3707	35.3192	35.006
	0.254002	0.318528	O46550;F1PFX6	O46550;F1PFX6			O46550				CAV2 CAV-2	2	13	2	2	23.5	23.5	23.5	17.931	0	15.317	21573000000	30.6325	30.4527	31.2857	30.6304	31.5873	31.6209
	0.610343	-0.274355	F1PFZ5	F1PFZ5			F1PFZ5				MFGE8	15	123	15	15	40.7	40.7	40.7	47.824	0	218.47	447480000000	35.6502	35.5973	35.8133	35.6419	35.1833	35.3468
	0.654334	0.192462	F1PFZ9	F1PFZ9			F1PFZ9				ADAM17	10	78	10	10	13.2	13.2	13.2	92.736	0	66.088	265170000000	34.817	34.7137	34.6609	35.0709	34.7751	34.9639
	0.109341	0.199485	F1PG57	F1PG57			F1PG57				LIPH	6	20	6	6	20.2	20.2	20.2	51.061	0	41.82	35885000000	31.2426	31.2829	32.0957	31.0203	32.4594	31.5486
	0.274863	0.110621	F1PG66	F1PG66			F1PG66				LAMC2	25	172	26	26	31.8	31.8	31.2	131.07	0	283.67	215430000000	34.6134	34.5621	34.3994	34.4575	34.8136	34.5981
	0.845927	0.254346	F1PGD5	F1PGD5			F1PGD5				CD302	41	393	41	41	27.6	27.6	27.6	198.29	0	323.31	1662000000000	37.257	37.1813	37.4572	37.4554	37.6503	37.7152
	0.126433	-0.381984	F1PGJ7;J9P5N9	F1PGJ7;J9P5N9			F1PGJ7				DDR1	5	7	5	5	8	8	8	101.82	0	30.482	15495000000	31.1684	31.5577	29.2984	29.4874	31.0983	31.6535
	0.0317269	0.0688324	F1PGL0	F1PGL0			F1PGL0				ADAMTS1	2	6	2	2	3.8	3.8	3.8	102.65	0	18.055	4645400000	28.9189	29.9121	30.15	30.4351	29.0232	NaN
	0.11293	0.0971502	J9P884;F1PGL1	J9P884;F1PGL1			J9P884				VCAN	9	35	9	9	4.5	4.5	4.5	260.62	0	67.707	56474000000	32.4221	32.8241	32.1391	32.7804	32.3375	32.3474
	0.0920852	-0.0885213	F1PGL5	F1PGL5			F1PGL5				CPM	11	127	11	11	40.2	40.2	40.2	41.429	0	149.75	461520000000	35.3504	35.5203	35.8601	35.1208	35.856	35.9314
	0.576103	0.128822	F1PGR0	F1PGR0			F1PGR0				ADAM10	18	258	18	18	27.3	27.3	27.3	85.069	0	296.9	1168900000000	36.8211	36.9821	37.0682	37.0688	37.1031	37.0497
	0.0421417	-0.0106284	F1PGX2;F1PGX1	F1PGX2;F1PGX1			F1PGX2				DSG2	59	1465	59	59	55.9	55.9	55.9	122.36	0	323.31	8394100000000	39.858	39.9517	39.7796	39.9255	39.7794	39.765
	0.242492	0.0754871	F1PH09;J9PA58	F1PH09;J9PA58			F1PH09				CENPV	6	53	6	6	40	40	40	19.428	0	90.9	195330000000	34.3221	34.2778	34.5742	34.4567	34.477	34.2742
	0.187758	0.082756	F1PH14	F1PH14			F1PH14				TMEM2	15	47	15	15	15.8	15.8	15.8	153.98	0	111.92	132720000000	33.6419	33.668	33.9359	33.6828	33.9799	33.7694
	0.611299	0.273647	F1PH17;E2R6Z2	F1PH17			F1PH17				PTPRD	18	129	23	18	18	14.3	14.3	211.76	0	194.6	218260000000	34.2399	34.4421	34.3683	34.3908	34.8567	34.8188
	0.482164	-0.206261	F1PHK9	F1PHK9			F1PHK9				LAMC1	28	130	28	28	26.3	26.3	26.3	164.63	0	306.23	154630000000	34.1053	34.3226	34.0476	33.7632	34.1413	34.1467
	0.0638737	-0.0116482	F1PHN5	F1PHN5			F1PHN5				GPRC5A	3	12	3	3	11.5	11.5	11.5	40.112	0	21.627	32752000000	31.976	31.8478	31.8953	31.8423	31.9471	31.4327
	0.311511	-0.144299	F1PHY9	F1PHY9			F1PHY9				IGSF9	2	15	2	2	2.5	2.5	2.5	126.66	0	18.135	9472400000	29.8931	30.2976	29.9192	29.9875	29.7971	30.0986
	0.0214788	0.0103372	F1PHZ1;F1PKX9	F1PHZ1;F1PKX9			F1PHZ1				PLXNA2	16	95	19	19	13.1	13.1	11.4	220.57	0	140.1	119250000000	33.4389	33.6814	33.7394	33.4919	33.7686	33.7815
	2.70311	-0.334766	F1PIB4	F1PIB4			F1PIB4				LRP2	5	17	5	5	1.4	1.4	1.4	510.1	0	30.748	18693000000	31.507	31.4974	31.5755	31.2024	31.1813	29.5067
	0.0748494	0.0357612	F1PID1	F1PID1			F1PID1				SLC9A1	3	11	3	3	4.9	4.9	4.9	90.968	0	19.336	25497000000	31.5695	31.6916	31.6871	31.8945	31.4759	31.3517
	0.452964	-0.124343	F1PID4;J9P7C6;Q52S86	F1PID4;J9P7C6;Q52S86			F1PID4				PODXL	16	339	16	16	21.2	21.2	21.2	57.268	0	311.5	3897000000000	38.7079	38.755	38.9395	38.7664	38.5865	38.6237
	0.776965	0.199986	F1PID8;E2RJ60	F1PID8;E2RJ60			F1PID8				DDX17	22	273	32	32	42.9	42.9	31.9	81.048	0	312.25	884890000000	36.455	36.2983	36.5309	36.5398	36.7163	36.7792
	0.433833	0.223595	F1PIF2	F1PIF2			F1PIF2				CTSZ	2	16	2	2	8	8	8	29.288	0	19.404	21499000000	31.0894	31.0686	31.5694	31.448	31.4841	30.925
	2.58978	0.339542	F1PIG0	F1PIG0			F1PIG0				TGFBR3	6	22	6	6	9.9	9.9	9.9	94.215	0	40.803	35062000000	31.7669	31.759	31.8208	32.1568	32.0867	32.2025
	0.402564	-0.145323	J9P9X0;J9NU59;F1PIL9	J9P9X0;J9NU59;F1PIL9			J9P9X0				IL1RAP	2	6	2	2	3.8	3.8	3.8	60.067	0	11.539	13613000000	30.8596	30.715	30.6108	30.7357	30.4305	30.2898
	0.800551	0.122367	F1PIQ9;O18735;F1PAC5;J9P025;E2R7P5;E2RHY5;J9P9H9	F1PIQ9;O18735			F1PIQ9				ERBB2	31	307	34	34	31.4	31.4	29.2	138.18	0	315.27	1217500000000	36.8751	36.8853	37.0258	37.0262	37.076	37.1937
	0.158339	-0.084789	F1PIT4	F1PIT4			F1PIT4				CD63	2	5	2	2	9.7	9.7	9.7	25.614	0.0014025	11.265	19428000000	31.6394	31.2801	31.3667	31.5283	31.1596	29.2593
	0.0831825	0.138141	F1PIT7	F1PIT7			F1PIT7				TMX4	2	7	2	2	8.5	8.5	8.5	33.468	0	12.151	7195300000	29.3637	29.029	30.1453	29.1336	30.1679	28.8024
	0.16313	-0.29912	F1PIX5	F1PIX5			F1PIX5				TMX3	4	8	4	4	14.1	14.1	14.1	51.513	0	27.498	15587000000	30.7829	31.2827	30.5924	31.4166	29.7572	30.2771
	1.00425	0.450279	F1PJ05;E2RJ19	F1PJ05			F1PJ05				CNNM4	15	88	16	16	25.7	25.7	24.6	86.577	0	116.49	139430000000	33.354	33.4653	33.7446	33.8141	34.129	34.0855
	0.550243	-1.54124	F1PJ84	F1PJ84			F1PJ84				MUC20	2	7	2	2	5.7	5.7	5.7	54.216	0	13.805	13909000000	31.3357	31.3261	31.0365	31.2616	28.1214	NaN
	0.635682	-0.124372	F1PJN2;F1PNT0	F1PJN2;F1PNT0			F1PJN2				LSAMP	16	161	16	16	48.8	48.8	48.8	31.656	0	269.91	722610000000	36.3576	36.3373	36.5266	36.2424	36.3232	36.0183
	0.0427911	0.0257893	F1PJP5	F1PJP5			F1PJP5				STT3A	10	60	10	10	13.6	13.6	13.6	89.552	0	64.426	176030000000	33.9508	34.2198	34.3274	34.0038	34.3798	34.4349
	1.88838	-0.371038	J9NTL4;F1PK94	J9NTL4;F1PK94			J9NTL4				CDH17	10	85	10	10	19.4	19.4	19.4	91.661	0	103.95	147790000000	34.3901	34.3421	34.2178	33.9743	33.917	34.1274
	0.77358	0.3361	F1PKT2	F1PKT2			F1PKT2				LSR	10	58	10	10	23.4	23.4	23.4	66.213	0	91.668	156920000000	34.2034	33.7751	33.9447	34.4359	34.1851	33.9795
	0.444171	-0.170207	F1PLG2	F1PLG2			F1PLG2				NNT	11	49	11	11	13.9	13.9	13.9	113.89	0	77.139	88367000000	33.4027	33.3539	33.514	33.4484	33.0582	33.3063
	0.101251	-0.0906617	F1PLR3	F1PLR3			F1PLR3				GPRC5C	4	27	4	4	13.8	13.8	13.8	48.209	0	30.373	24532000000	31.7054	31.6117	31.8754	32.0407	31.2397	30.522
	1.25216	-0.419316	F1PLV2;J9NVL9	F1PLV2;J9NVL9			F1PLV2				PPIB	14	125	14	14	62.5	62.5	62.5	23.775	0	122.37	575060000000	36.1861	36.2716	36.5222	35.9689	35.8458	35.9188
	0.0126818	-0.00608508	J9P5A2;F1PLY1	J9P5A2;F1PLY1			J9P5A2				CELSR1	23	141	23	23	12.6	12.6	12.6	292.48	0	175.2	251120000000	34.7252	34.7646	34.733	34.5274	34.9423	34.8383
	0.36059	-0.099268	F1PM26	F1PM26			F1PM26				CD109	30	230	30	30	29.4	29.4	29.4	162.23	0	323.31	340810000000	35.0251	35.106	35.3124	35.059	35.0381	35.4392
	1.11205	0.274754	F1PM35;J9P3V3	F1PM35			F1PM35				GPC4	10	59	10	10	23.4	23.4	23.4	62.432	0	68.477	121620000000	33.5002	33.6377	33.5727	33.7238	33.9661	33.6804
	0.914055	0.416506	F1PM51;F1Q1M9	F1PM51;F1Q1M9			F1PM51				EPCAM	17	231	17	17	44.9	44.9	44.9	35.357	0	301.14	2739700000000	37.6474	37.9348	38.1632	38.2944	38.3689	38.2586
	0	1.22749	F1PN78;J9P2M7	F1PN78;J9P2M7			F1PN78				EMC1	2	7	2	2	3.5	3.5	3.5	111.78	0	16.89	3125500000	NaN	NaN	28.317	NaN	29.5445	29.0741
	0.608099	2.3462	F1PNA2	F1PNA2			F1PNA2				ABCC4	3	7	3	3	3	3	3	149.61	0	17.754	16969000000	27.9789	28.2486	29.3339	28.7951	32.9382	32.4879
	0.463775	0.325232	J9NXA9;P38377;F1PNM2;F1PC79	J9NXA9;P38377;F1PNM2;F1PC79			J9NXA9				SEC61A1	9	61	9	9	23.5	23.5	23.5	51.867	0	121.28	203420000000	33.956	34.1015	34.6769	34.4922	34.6478	34.3182
	0.159184	0.0633443	F1PP33;J9NUT8	F1PP33;J9NUT8			F1PP33				ITGA1	21	175	21	21	17.5	17.5	17.5	130.51	0	191.2	718810000000	36.2296	36.1746	36.3499	36.141	36.4885	36.382
	0.322196	0.125509	F1PP71	F1PP71			F1PP71				F11R	13	143	13	13	40.6	40.6	40.6	32.694	0	137.45	856520000000	36.3059	36.4802	36.6812	36.5267	36.7025	36.5343
	0.55709	-0.113481	F1PPH0;F1PPD8;F1Q2E3	F1PPH0;F1PPD8;F1Q2E3			F1PPH0				FGFR2	2	6	2	2	3.3	3.3	3.3	79.517	0	12.305	9162000000	30.1449	30.005	30.216	29.9672	30.0497	29.8016
	0.0566802	0.0424147	F1PPG9;J9P3Z1	F1PPG9;J9P3Z1			F1PPG9				SLC37A4	4	16	4	4	10.7	10.7	10.7	46.292	0	26.13	43507000000	31.9966	31.9999	32.4722	31.9973	32.4001	32.453
	0.163633	0.0428114	F1PPI5	F1PPI5			F1PPI5				SLC1A5	2	9	2	2	5.3	5.3	5.3	57.507	0	13.336	10914000000	30.2333	30.1656	30.2242	30.3741	30.1269	30.3728
	2.069	0.362281	F1PPP5;F1PS94	F1PPP5;F1PS94			F1PPP5				NOTCH2	10	57	10	10	6.5	6.5	6.5	247.61	0	102.1	54490000000	32.5503	32.5295	32.4159	32.8916	32.83	32.4414
	0.424023	0.445798	F1PQ05	F1PQ05			F1PQ05				ERBB4	4	9	7	4	7.5	5.3	5.3	140.22	0	24.666	20006000000	31.1062	31.4026	30.2982	31.2974	31.4655	30.6518
	0.381431	0.152647	F1PQ47	F1PQ47			F1PQ47				SPINT1	12	75	12	12	30.1	30.1	30.1	56.377	0	110.03	280550000000	34.5405	34.7857	34.8215	34.7142	35.0229	35.3321
	0.0900001	-0.0379467	F1PQM7	F1PQM7			F1PQM7				CD9	2	33	2	2	11.1	11.1	11.1	22.798	0	27.373	132340000000	33.836	33.7946	33.9193	33.9985	33.6255	34.1005
	0.825195	-0.768312	F1PQT1	F1PQT1			F1PQT1				SCARB1	3	7	3	3	7.9	7.9	7.9	51.662	0	17.582	23961000000	31.5813	31.7164	31.5846	31.3884	30.3299	31.2868
	0.043969	0.0120309	F1PR26;J9NW82	F1PR26;J9NW82			F1PR26				PTGFRN	52	843	52	52	53	53	53	97.134	0	323.31	8205100000000	39.7931	39.7587	39.922	39.7491	39.9241	39.6725
	0.169908	0.0213725	F1PRC5	F1PRC5			F1PRC5				SLC3A2	19	149	19	19	39.6	39.6	39.6	58.545	0	235.56	391420000000	35.417	35.464	35.5088	35.5266	35.4427	35.4315
	0.761791	0.265463	F1PRH1	F1PRH1			F1PRH1				ABCB6	6	21	6	6	8.3	8.3	8.3	107.26	0	43.728	27422000000	31.5516	31.3183	31.6221	31.8842	31.6414	31.834
	0.116316	0.0514495	F1PRQ8;F1PAD5;F1P9P1;F1PXV3;F1PXW8;F1PAD6	F1PRQ8			F1PRQ8				EPHB4	16	91	18	18	25.7	25.7	23.8	108.5	0	154.86	239660000000	34.7026	34.7598	34.6591	34.9635	34.5538	34.5192
	1.1128	0.288632	P50551;F1PRR4;F1PB84	P50551;F1PRR4			P50551				VASP	7	36	7	7	26.8	26.8	26.8	40.413	0	53.788	82438000000	33.1937	33.1525	32.9735	33.3076	33.4828	32.9742
	0.0875822	-0.0860179	F1PRS5	F1PRS5			F1PRS5				ATP13A1	7	15	7	7	7.5	7.5	7.5	133.2	0	44.41	26157000000	31.7707	31.8015	30.9933	31.4444	31.4273	31.4228
	0.668826	0.287687	J9NY13;F1PRY2	J9NY13;F1PRY2			J9NY13				ABCC3	10	35	11	11	10	10	9.4	168.86	0	72.732	56126000000	32.5275	32.3351	32.7048	32.6482	32.9721	32.4222
	1.07878	0.229038	F1PSB1	F1PSB1			F1PSB1				SEMA4D	15	108	15	15	20.1	20.1	20.1	107.91	0	173.93	240470000000	34.7179	34.641	34.5117	34.9124	34.7927	34.7119
	0.318428	-0.152378	Q28923;F1PSB7	Q28923;F1PSB7			Q28923				YES1 YES	2	8	4	2	9.3	4.8	4.8	60.299	0	11.596	16434000000	31.1205	30.9773	30.7354	30.9557	30.6283	31.0287
	0.0773979	-0.0372276	F1PSG1	F1PSG1			F1PSG1				ERMP1	16	107	16	16	23.4	23.4	23.4	99.924	0	129.2	210500000000	34.3674	34.389	34.6093	34.2403	34.5956	34.6017
	0.347002	0.349055	P54832;F1PSG5	P54832;F1PSG5			P54832				PON2	5	45	5	5	24	24	24	39.639	0	45.72	85820000000	33.2171	32.5678	32.6237	32.749	33.5549	33.4594
	0.16669	0.121802	F1PSK9;J9P6V8;J9JHT5	F1PSK9;J9P6V8;J9JHT5			F1PSK9				NUP210	8	18	8	8	6	6	6	200.59	0	49.211	27361000000	31.4799	31.3591	30.9556	31.1528	31.6206	32.1708
	1.10754	0.575242	F1PSN8;F1PQY5	F1PSN8;F1PQY5			F1PSN8				ESRP1	2	10	2	2	4.6	4.6	4.6	70.262	0	13.341	5969700000	29.4823	29.0093	29.1111	29.6216	29.9307	30.1765
	0.606254	-0.563886	F1PTB2	F1PTB2			F1PTB2				IL6ST	3	8	3	3	5.2	5.2	5.2	94.276	0	20.06	9066700000	30.3733	30.5959	30.3167	30.3721	29.3574	29.6176
	0.14014	-0.0881977	F1PTE3	F1PTE3			F1PTE3				RAB13	3	10	5	3	26.6	17.2	17.2	22.667	0	19.499	23093000000	31.558	31.3936	31.1457	31.5015	31.0536	31.4696
	2.64349	0.756336	F1PTN5	F1PTN5			F1PTN5				TAP1	3	13	4	3	7.5	5.6	5.6	84.798	0	29.902	8219000000	29.1713	29.1695	28.9917	29.8786	29.8557	30.198
	0.232127	-0.12217	F1PTP6	F1PTP6			F1PTP6				P4HA2	6	16	6	6	15.4	15.4	15.4	60.647	0	41.227	16174000000	31.0892	31.2977	30.8029	31.0454	30.8367	30.9909
	0.404329	0.0931416	F1PTR3	F1PTR3			F1PTR3				ACSF2	14	110	14	14	34.2	34.2	34.2	67.843	0	160.1	212100000000	34.6381	34.4503	34.6315	34.7335	34.5994	34.4985
	1.40343	-0.196014	F1PTU4	F1PTU4			F1PTU4				PCCB	30	512	30	30	59.2	59.2	59.2	59.976	0	323.31	3283900000000	38.6342	38.6835	38.5496	38.3939	38.4589	38.4942
	0.44585	0.217112	J9P423;F1PTZ7;Q28284	J9P423;F1PTZ7;Q28284			J9P423				CD44	10	72	10	10	33.3	33.3	33.3	39.52	0	104.81	286880000000	34.7932	34.783	35.0155	34.8462	35.3158	35.0376
	0.0532033	-0.00789197	F1PUP2;F1PUN5;F1PTF5;F1PTF3;F1PTF2;F1PVZ9;F1PW00	F1PUP2;F1PUN5			F1PUP2				PTPRM	36	215	36	36	27.8	27.8	27.8	161.39	0	323.31	753740000000	36.4134	36.4462	36.3199	36.4	36.3705	36.2154
	1.31043	-0.386064	F1PUW7	F1PUW7			F1PUW7				SLC1A1	3	29	3	3	8.6	8.6	8.6	56.81	0	37.548	22971000000	31.2303	31.5128	31.431	30.9353	31.0753	31.1774
	0.447392	-0.744546	F1PV60	F1PV60			F1PV60				FOLH1	2	5	2	2	3.5	3.5	3.5	78.215	0	12.948	8379000000	28.7528	29.8043	30.4282	28.5579	29.2766	29.9654
	0.244218	0.16866	F1PV63	F1PV63			F1PV63				CDCP1	20	150	20	20	28	28	28	92.482	0	138.09	351040000000	34.8903	35.0952	35.3389	35.001	35.5526	35.4213
	0.477345	-0.154907	F1PV92	F1PV92			F1PV92				CS	7	37	7	7	13.5	13.5	13.5	52.113	0	46.227	67637000000	32.8976	32.7927	33.1437	32.7775	32.802	32.7576
	0.679609	0.33217	F1PVC5	F1PVC5			F1PVC5				ERBB3	11	68	11	11	18.2	18.2	18.2	113.26	0	111.32	63688000000	32.2829	32.806	32.6873	32.8701	32.9783	33.0295
	0.956475	-0.373454	F1PVS7	F1PVS7			F1PVS7				PVR	5	27	5	5	18.5	18.5	18.5	43.704	0	49.455	142650000000	34.0154	34.3636	33.9475	33.7322	33.7385	33.851
	0.130748	0.037768	F1PVX2	F1PVX2			F1PVX2				DCBLD2	13	74	13	13	23.7	23.7	23.7	80.441	0	109.78	169640000000	34.0326	34.1555	34.231	34.2742	34.0808	34.3089
	0	NaN	F1PVX5	F1PVX5			F1PVX5				SEL1L	2	10	2	2	4.7	4.7	4.7	88.696	0	15.504	1486000000	NaN	NaN	NaN	NaN	NaN	NaN
	1.00365	-0.17449	F1PVZ1	F1PVZ1			F1PVZ1				CHRM4	2	9	2	2	7.9	7.9	7.9	52.939	0	13.015	16485000000	31.0753	31.0997	30.9336	30.9037	30.8196	29.9462
	0.212382	0.537152	F1PWA9	F1PWA9			F1PWA9				ASAH1	2	8	2	2	6.2	6.2	6.2	41.959	0.0020776	11.002	5727300000	NaN	28.1997	29.4448	28.7017	30.017	29.3887
	0.300665	0.156382	F1PWC1;E2REV6	F1PWC1;E2REV6			F1PWC1				PTPRG	13	72	13	13	12.4	12.4	12.4	154.7	0	87.486	107620000000	33.1224	33.6121	33.5338	33.6581	33.5002	33.5139
	0.282661	0.8362	F1PWE3	F1PWE3			F1PWE3				TM9SF4	4	13	4	4	11.5	11.5	11.5	74.495	0	31.467	18736000000	29.0377	31.436	31.7738	32.0072	31.1635	30.485
	0.103658	0.0634616	F1PWN2;F6X8D7	F1PWN2;F6X8D7			F1PWN2				SLC2A1	3	9	3	3	3.9	3.9	3.9	54.1	0	19.411	18329000000	31.3097	30.7951	30.9336	31.1892	30.9633	31.6174
	0.137645	-0.0545607	J9NZ75;Q9BEA0;F1PWS8	J9NZ75;Q9BEA0;F1PWS8			J9NZ75				EGF	3	19	3	3	4	4	4	133.81	0	22.004	9919500000	30.1096	30.4199	30.1568	30.0799	30.2685	29.2449
	0.311241	-0.0663579	F1PWT3	F1PWT3			F1PWT3				DNASE1L1	9	84	9	9	37.3	37.3	37.3	33.36	0	70.347	211290000000	34.5063	34.5106	34.5059	34.3283	34.5543	34.6186
	1.08195	0.442355	F1PWW0	F1PWW0			F1PWW0				FLNA	18	81	20	18	10.5	10.2	10.2	280.66	0	132.16	78533000000	32.5704	32.9143	32.9576	33.1643	33.3486	33.3536
	0	0.915321	F1PXK2	F1PXK2			F1PXK2				UNC93B1	2	5	2	2	5.8	5.8	5.8	58.183	0	13.39	3997100000	NaN	NaN	28.7584	NaN	29.6737	29.3629
	0.622736	0.569159	F1PXM2	F1PXM2			F1PXM2				MMP14	9	32	9	9	26.3	26.3	26.3	65.852	0	78.622	53807000000	31.8495	32.6369	32.2831	32.4865	33.1647	32.4566
	0.104035	0.100237	F1PXM6	F1PXM6			F1PXM6				PLXNB3	4	8	4	4	2.8	2.8	2.8	207.13	0	25.093	105690000000	33.656	33.6717	33.2153	33.989	33.2402	33.6032
	0.159569	0.057855	F1PXU6;J9NY09;E2RPM8;E2R795	F1PXU6			F1PXU6				IGF1R	51	448	51	51	41.2	41.2	41.2	154.89	0	323.31	2167400000000	37.5752	37.6108	37.8612	37.6539	37.8265	38.0405
	0.359174	0.451063	F1PZL5	F1PZL5			F1PZL5				PLOD2	2	9	2	2	4.3	4.3	4.3	87.631	0	14.175	9263900000	NaN	30.2888	29.5041	30.0912	30.6037	30.404
	0.261393	-0.198513	F1Q051	F1Q051			F1Q051				KIRREL	3	5	3	3	6	6	6	82.875	0	19.42	5226100000	28.8649	29.3725	29.5238	28.8645	29.2459	28.2325
	0.880205	-1.20971	J9P9D2;F1Q0F2	J9P9D2;F1Q0F2			J9P9D2				SLC31A1	2	5	2	2	16.9	16.9	16.9	19.823	0	13.946	11296000000	30.6974	30.9153	30.8516	30.3924	28.8311	29.9711
	0.592483	0.42314	F1Q0S2	F1Q0S2			F1Q0S2				ATP1B3	2	15	2	2	13.5	13.5	13.5	24.95	0	14.991	13083000000	30.1911	30.7852	30.2433	30.5934	31.0659	30.013
	0.17173	0.351496	J9P046;F1Q129	J9P046;F1Q129			J9P046				COL4A2	3	12	3	3	4.9	4.9	4.9	75.708	0	18.893	27656000000	31.6325	32.2309	30.4204	31.3597	32.1992	31.8896
	0.102434	0.0577275	F1Q133;F1Q0F7;Q28247;J9P9L4;F1PH05	F1Q133			F1Q133				COL4A1	4	25	4	4	4.1	4.1	4.1	156.2	0	31.261	31518000000	31.4987	31.7347	31.8479	31.554	31.949	32.0671
	0.314834	-0.278943	F1Q1M8	F1Q1M8			F1Q1M8				HEXB	3	9	3	3	10.8	10.8	10.8	51.92	0	18.816	21362000000	30.8401	30.8057	31.6291	30.878	30.7474	32.0262
	0.162647	-0.0677198	F1Q260	F1Q260			F1Q260				LAMP1	3	17	3	3	8.9	8.9	8.9	44.616	0	20.789	67932000000	33.1439	32.9207	33.1405	33.1609	32.8404	32.7802
	0.0674555	0.0422961	F1Q2Z6	F1Q2Z6			F1Q2Z6				AGRN	20	96	20	20	14.1	14.1	14.1	216.6	0	217.8	101460000000	33.5991	33.7868	33.2641	33.4803	33.7043	33.5156
	0.172088	0.376527	F1Q332	F1Q332			F1Q332				GARS	4	9	4	4	7.2	7.2	7.2	88.94	0	22.958	10651000000	30.6371	28.6653	30.0755	29.7922	30.5461	30.7197
	0.363016	0.0941429	F1Q3A2	F1Q3A2			F1Q3A2				TMPRSS11E	23	198	23	23	52.6	52.6	52.6	47.761	0	323.31	812650000000	36.4058	36.4386	36.5923	36.4746	36.6715	36.492
	1.15213	0.417292	F1Q3G2	F1Q3G2			F1Q3G2				SLIT3	20	140	20	20	21	21	21	145.16	0	196.26	168520000000	34.0365	34.0779	33.8459	34.2429	34.5652	34.4578
	0.0513499	-0.0230732	J9P6J1;F1Q3G6	J9P6J1;F1Q3G6			J9P6J1				MUC1	12	578	12	12	32.4	32.4	32.4	30.934	0	235.32	1708700000000	37.2995	37.4459	37.6816	37.389	37.5162	37.6193
	0.0123512	0.0292133	F1Q3W8	F1Q3W8			F1Q3W8				SDHB	7	25	7	7	26.8	26.8	26.8	31.508	0	102.62	44469000000	32.39	31.1365	32.1548	31.1411	32.7048	32.6829
	0.575447	0.248111	F1Q439	F1Q439			F1Q439				ITGA3	21	161	21	21	26.2	26.2	26.2	116.73	0	161.03	489390000000	35.3394	35.614	35.5802	35.5667	35.9519	35.8052
	0.10747	-0.0560551	F1Q4C5;F1PX14	F1Q4C5;F1PX14			F1Q4C5				EPHA2	11	67	13	11	16.1	14.2	14.2	108.26	0	79.147	105700000000	33.5326	33.5806	33.6296	33.2826	33.7672	33.5389
	0.480939	-0.141649	F1Q4K7	F1Q4K7			F1Q4K7				SLITRK4	21	182	21	21	29.5	29.5	29.5	94.503	0	186.82	355300000000	35.417	35.362	35.2797	35.36	35.0625	35.4152
	0.239456	0.250431	P24409;F2Z4P9;J9NUV0	P24409;F2Z4P9;J9NUV0			P24409				RAB10	8	79	9	8	43	43	43	22.569	0	66.794	435690000000	35.0021	35.185	35.5834	35.0595	35.955	35.7671
	0.0322499	0.0199407	P38486;F6PME1;E2QYB5	P38486;F6PME1			P38486				LGALS3	21	408	22	22	44.3	44.3	44.3	30.33	0	240.94	5254200000000	38.9707	39.0891	39.2174	38.8675	39.3572	39.2127
	0.0872487	-0.044782	F6V1W9	F6V1W9			F6V1W9				TF	8	36	8	8	9.2	9.2	9.2	110.51	0	54.102	65453000000	33.2018	33.0006	33.1125	33.2773	32.8432	32.5722
	0.346252	0.323078	F6V9R9	F6V9R9			F6V9R9				GLG1	5	11	5	5	5.6	5.6	5.6	134.94	0	31.643	13283000000	30.3198	29.8376	30.8331	30.5971	30.7094	30.3499
	1.14388	1.0974	F6X717	F6X717			F6X717				ITGB8	4	25	4	4	6.7	6.7	6.7	86.782	0	25.975	22136000000	30.379	30.1447	31.1057	31.8387	31.4424	31.4885
	0.0399556	-0.0234871	F6XD36	F6XD36			F6XD36				TMED9	4	43	4	4	19.5	19.5	19.5	27.708	0	197.56	100740000000	33.4323	33.7044	33.6047	33.7807	33.3332	33.0557
	1.6305	-0.391914	F6XRM5	F6XRM5			F6XRM5				ENPEP	15	104	15	15	18.1	18.1	18.1	109.2	0	127.66	163450000000	34.1621	34.4076	34.2779	33.8936	33.8876	34.1438
	0.28423	-0.203475	F6XTD9	F6XTD9			F6XTD9				NUP155	12	50	12	12	14.1	14.1	14.1	155.13	0	106.8	42350000000	32.2894	31.8497	32.5467	31.8959	32.1543	32.1675
	0.387233	0.134358	F6Y3U7	F6Y3U7			F6Y3U7				COL18A1	5	23	5	5	5.7	5.7	5.7	151.63	0	43.665	50586000000	32.3476	32.5748	32.3549	32.4225	32.6977	32.578
	0.373727	0.513306	F6Y6T8	F6Y6T8			F6Y6T8				PIGR	8	22	8	8	15.1	15.1	15.1	83.194	0	52.313	17730000000	31.1769	30.9559	29.8025	31.0641	31.2526	30.409
	0.0650766	0.136265	O18835;G1K299	O18835;G1K299			O18835				GUSB	2	7	2	2	3.7	3.7	3.7	74.432	0	14.258	5626100000	29.0306	NaN	30.071	30.1338	29.2404	28.9938
	0.57448	0.159355	P62490;J9JHN1	P62490;J9JHN1			P62490				RAB11A RAB11	4	19	5	5	24.5	24.5	20.8	24.393	0	31.534	101690000000	33.2944	33.3097	33.566	33.5125	33.5862	33.5887
	0.0207033	0.015955	J9NRJ0;F1PHM5;J9NSQ6	J9NRJ0;F1PHM5;J9NSQ6			J9NRJ0				HSPG2	40	176	40	40	13.5	13.5	13.5	467.85	0	323.31	331540000000	35.1478	35.1632	35.039	34.8018	35.4635	35.2001
	0.370987	-0.355386	J9NSZ7	J9NSZ7			J9NSZ7				MPZL1	2	9	2	2	8.3	8.3	8.3	35.915	0	25.645	9830900000	30.1451	30.5961	30.3376	30.4707	29.5377	29.1037
	1.06414	0.691537	J9NTA1	J9NTA1			J9NTA1				METTL7A	3	15	3	3	20.4	20.4	20.4	28.05	0	24.05	18263000000	30.5556	NaN	30.6885	31.1065	31.5207	31.1872
	0	-0.266882	J9NV57	J9NV57			J9NV57				TM2D2	2	5	2	2	13.1	13.1	13.1	22.925	0	12.916	3378800000	29.3937	29.1058	NaN	28.9828	NaN	29.0648
	0.532587	-0.242603	J9NVI2	J9NVI2			J9NVI2				BST2	5	37	5	5	16.5	16.5	16.5	20.627	0	40.222	356260000000	35.5921	35.5614	35.3507	35.4786	35.0389	35.0703
	0.0852051	-0.0267779	J9NWM0	J9NWM0			J9NWM0				SCAMP1	2	8	2	2	10.7	10.7	10.7	37.906	0	15.939	6947100000	30.0372	30.0908	30.1279	29.9195	30.1975	28.6407
	0.409768	0.420666	J9NWS8	J9NWS8			J9NWS8				RDH14	4	12	4	4	10.7	10.7	10.7	41.268	0	26.017	19141000000	30.5976	30.6392	31.2882	31.6696	30.855	31.1003
	0.157438	0.0790488	J9NZ79	J9NZ79			J9NZ79				SDC4	7	47	7	7	34.7	34.7	34.7	21.94	0	55.916	104250000000	33.5821	33.6477	33.2149	33.64	33.4812	33.7085
	1.5163	0.253676	J9NZU1;F1PQ46	J9NZU1;F1PQ46			J9NZU1				ANO6	14	81	14	14	17.7	17.7	17.7	106.18	0	110.38	252170000000	34.6205	34.4942	34.6351	34.7955	34.8784	34.7295
	0.820001	0.613977	J9P2T1;F1PDU1	J9P2T1;F1PDU1			J9P2T1				NEO1	11	49	11	11	12.3	12.3	12.3	159.35	0	74.047	55355000000	32.0267	31.8773	31.9236	32.1332	32.9798	33.1644
	0.459178	-0.144855	P49256;J9P396	P49256;J9P396			P49256				LMAN2	3	7	3	3	11	11	11	40.213	0	17.345	17293000000	31.0223	30.9115	31.2045	30.9944	30.8081	30.9659
	1.09756	0.190069	J9P3V6;F1PWJ7	J9P3V6;F1PWJ7			J9P3V6				BCAM	27	344	27	27	44.9	44.9	44.9	67.747	0	323.31	2499000000000	37.916	38.0767	38.057	38.1632	38.2501	38.1016
	0.961996	0.229573	J9P4L2	J9P4L2			J9P4L2				ERP29	4	17	4	4	13.1	13.1	13.1	41.667	0	25.074	37004000000	32.1191	32.0093	31.9295	32.3466	32.1512	32.1263
	0.145685	0.148315	J9P4N4	J9P4N4			J9P4N4				CD59	4	22	4	4	18	18	18	15.628	0	37.728	47076000000	32.3359	32.9158	32.1743	32.9298	32.3175	31.5484
	1.59153	0.848259	Q75ZY9;J9P743;Z4YHE9;F1PEM3;J9NY14;F1PR52;E2RQT0;F6XRA9	Q75ZY9;J9P743;Z4YHE9			Q75ZY9				MET	31	289	32	32	29.7	29.7	29.2	154.64	0	323.31	835250000000	35.782	36.1126	35.7739	36.5421	36.9334	36.9443
	0.843024	-0.256133	J9P7Y2;F1P7C5	J9P7Y2;F1P7C5			J9P7Y2				ACE2	25	292	25	25	35.2	35.2	35.2	92.845	0	306.22	1570000000000	37.5069	37.4515	37.7772	37.3312	37.3137	37.3496
	0.350725	0.141723	J9P9A6	J9P9A6			J9P9A6				LHFPL2	2	11	2	2	13.9	13.9	13.9	19.701	0	14.168	64024000000	32.6558	32.6179	33.0049	32.8601	32.9424	32.8129
	0.0097599	0.00498327	J9PAF7;F1PTY0	J9PAF7;F1PTY0			J9PAF7				SLC4A7	10	44	10	10	12.9	12.9	12.9	126.71	0	80.482	56516000000	32.4192	32.8133	32.7689	32.6243	32.7199	32.5042
	0.0044319	0.000730515	O46674;J9P2B9;E2RQY6;J9P9P2;E2RRB2	O46674			O46674				ATP2A2	9	52	9	9	13.5	13.5	13.5	109.65	0	112.29	71935000000	32.9401	33.044	33.0645	33.0412	32.9926	32.9576
	0.263286	-0.0994663	P06583;J9P7J0;F1PMF0	P06583;J9P7J0;F1PMF0			P06583				ATP1B1	11	112	11	11	29	29	29	35.239	0	83.584	914070000000	36.6905	36.544	36.7175	36.3785	36.7239	36.6775
	0.175524	-0.0498988	P24643	P24643			P24643				CANX	3	244	24	24	33.7	33.7	5.9	67.603	0	255.99	707720000000	36.3065	36.4579	36.2879	36.4067	36.195	36.2887
	0.136627	0.110327	P33724;F1PWG1	P33724			P33724				CAV1 CAV	8	84	8	8	47.8	47.8	47.8	20.605	0	66.516	414130000000	35.2836	35.1684	35.7412	35.2612	35.7549	35.416
	0.871601	0.506561	P51147	P51147			P51147				RAB5C	4	26	7	4	38.9	24.1	24.1	23.455	0	28.596	57343000000	32.5304	32.1403	32.6974	33.1345	32.7907	32.9154
	1.28372	-0.865976	P60952;J9P730;F1PMW9	P60952;J9P730			P60952				CDC42	2	29	3	2	19.9	14.1	14.1	21.258	0	17.039	37776000000	32.4419	32.3343	32.9265	31.5062	31.897	31.935
	0.232432	0.114487	P61007;J9NWR1;E2QSW2;E2RIA5;E2RC93;F1PWY4	P61007;J9NWR1			P61007				RAB8A MEL RAB8	4	34	6	5	29	23.7	19.8	23.668	0	43.243	70966000000	32.986	33.147	33.4783	33.3431	33.2934	32.868
	1.75625	-0.428459	P62999;F1P7Q4;F1PYQ1;E2RJH1;F1PW88;E2QU83;F1PYF1	P62999;F1P7Q4;F1PYQ1			P62999				RAC1	9	78	10	10	50	50	44.3	21.45	0	67.381	330210000000	35.3502	35.437	35.4918	35.095	34.9007	35.0974
	0.504992	0.707761	P63091;F6Y6T1;J9P7G0	P63091;F6Y6T1;J9P7G0			P63091				GNAS GNAS1	3	8	4	3	12.4	9.6	9.6	45.664	0	18.009	10705000000	28.988	29.0379	30.0536	29.5643	30.5709	30.8745
	1.113	-0.198217	Q004B2;Q004A8;Q004B0;J9P5R8;Q004B1;J9PB47;A1YV64;J9NYC5;E2R9V7;E2R9W0;F1PCZ8	Q004B2;Q004A8;Q004B0;J9P5R8;Q004B1			Q004B2				CEACAM1	13	170	13	13	24.6	24.6	24.6	56.421	0	323.31	490790000000	35.6926	35.7797	35.8654	35.5299	35.6322	35.7157
	0.893339	-2.32271	Q00589	Q00589			Q00589				SLC6A6	4	10	4	4	8.1	8.1	8.1	69.728	0	22.837	64924000000	33.5552	33.6084	33.089	29.6311	32.5586	32.3271
	0.288208	-0.11041	Q1W2J9;O46501	Q1W2J9;O46501			Q1W2J9				PRNP	2	15	2	2	7.8	7.8	7.8	27.779	0	32.741	37109000000	32.2556	32.2062	32.264	32.3303	31.9328	30.9838
	1.07999	-0.604483	Q4LAL9	Q4LAL9			Q4LAL9				CTSD	9	84	9	9	29.8	29.8	29.8	44.32	0	102.05	255660000000	35.0752	35.252	35.551	34.4821	34.8944	34.9192
	0.0152686	0.0460574	Q5TJE4	Q5TJE4			Q5TJE4				TAPBP	7	18	7	7	21.2	21.2	21.2	47.773	0	43.772	30243000000	31.7752	30.1904	31.1579	30.0436	32.1308	32.136
	0.794155	-0.241074	Q6TEQ7;E2RKW9;J9PAF9;J9P1X3	Q6TEQ7			Q6TEQ7				ANXA2 ANX2	22	188	22	22	58.1	58.1	58.1	38.654	0	323.31	759910000000	36.3468	36.5403	36.6303	36.1677	36.3617	36.3237
	0.415285	0.334064	Q95KM6;J9NUV1	Q95KM6;J9NUV1			Q95KM6				CLDN2	3	29	3	3	15.2	15.2	15.2	24.502	0	66.136	118040000000	33.563	33.9613	33.1245	33.7447	34.0227	34.0488
	0.848264	0.144271	Q9N281;F6XBP8;E2QXQ6	Q9N281;F6XBP8;E2QXQ6			Q9N281				COL17A1 BP180 BPAG2	15	106	15	15	10.6	10.6	10.6	163.07	0	132.34	267900000000	34.8423	34.7288	34.67	34.8481	34.9345	35.0274
	0.230285	-0.119041	Q9TSX8	Q9TSX8			Q9TSX8				VNN1	3	312	22	22	42	42	7.4	57.431	0	266.31	919300000000	36.6552	36.6645	36.6123	36.262	36.7879	36.6609
	1.72438	0.161512	Q9TSZ6	Q9TSZ6			Q9TSZ6					15	102	15	15	18.7	18.7	18.7	97.191	0	100.67	234870000000	34.6305	34.5932	34.6627	34.7591	34.8215	34.7954

## Sheet: 5d. PTEN BL 12h
Significant	-log(P-value)	Difference	Protein IDs	Majority protein IDs	Protein names	Gene names	Majority protein IDs single	Only identified by site	Reverse	Potential contaminant	Surfaceome	Unique peptides	MS/MS count	Peptides	Razor + unique peptides	Sequence coverage [%]	Unique + razor sequence coverage [%]	Unique sequence coverage [%]	Mol. weight [kDa]	Q-value	Score	Intensity	Intensity BL_1	Intensity BL_2	Intensity BL_3	Intensity BL12h_1	Intensity BL12h_2	Intensity BL12h_3
+	2.15827	-5.62692	tr|E2RN38|E2RN38_CANLF	tr|E2RN38|E2RN38_CANLF			E2RN38				CALU	10	25	10	10	37.1	37.1	37.1	37.077	0	90.081	4203800000	31.4319	31.4156	28.8165	24.4743	24.0495	26.2595
+	1.2894	-4.25817	tr|F1PAG7|F1PAG7_CANLF	tr|F1PAG7|F1PAG7_CANLF			F1PAG7				LRPAP1	10	20	10	10	30.8	30.8	30.8	42.353	0	68.906	1892500000	30.4634	30.1837	27.2462	25.383	NaN	24.6962
+	3.46613	-3.99558	tr|F1P9T5|F1P9T5_CANLF	tr|F1P9T5|F1P9T5_CANLF			F1P9T5				FKBP11	5	11	5	5	23	23	23	22.582	0	15.65	1359400000	29.5379	29.2397	28.5512	25.449	25.1213	24.7716
+	3.10816	-3.88564	tr|E2RKK6|E2RKK6_CANLF	tr|E2RKK6|E2RKK6_CANLF			E2RKK6				PRKCSH	12	30	12	12	21.6	21.6	21.6	60.49	0	62.421	4573300000	30.9214	31.1866	30.3485	27.5268	26.3383	26.9345
+	2.67381	-3.6309	tr|E2QZA8|E2QZA8_CANLF	tr|E2QZA8|E2QZA8_CANLF			E2QZA8				FKBP10	16	41	16	16	32.1	32.1	32.1	64.353	0	60.077	3769000000	31.1129	30.8864	29.5162	27.0873	26.8788	26.6566
+	1.3364	-3.00544	tr|F1PLV2|F1PLV2_CANLF;tr|J9NVL9|J9NVL9_CANLF	tr|F1PLV2|F1PLV2_CANLF;tr|J9NVL9|J9NVL9_CANLF			F1PLV2				PPIB	30	217	30	30	79.2	79.2	79.2	23.775	0	323.31	87362000000	35.9136	35.3058	33.1349	31.0748	31.229	33.0342
+	2.23109	-2.98391	tr|J9P7R9|J9P7R9_CANLF	tr|J9P7R9|J9P7R9_CANLF			J9P7R9				MESDC2	3	9	3	3	16.1	16.1	16.1	24.776	0	27.931	1794900000	30.2444	29.4337	28.4107	26.249	26.17	26.7182
+	2.65704	-2.78827	tr|E2RLA2|E2RLA2_CANLF;tr|E2RLB8|E2RLB8_CANLF	tr|E2RLA2|E2RLA2_CANLF;tr|E2RLB8|E2RLB8_CANLF			E2RLA2				P4HA1	13	21	13	13	29	29	29	61.047	0	103.06	2268600000	29.992	30.0786	28.9827	26.6737	27.2699	26.7448
+	1.45928	-2.76671	tr|E2RCY4|E2RCY4_CANLF	tr|E2RCY4|E2RCY4_CANLF			E2RCY4				DNAJC10	9	16	9	9	13	13	13	91.279	0	22.154	1076600000	29.2525	28.555	27.8539	24.3203	26.0499	26.991
+	2.3406	-2.52299	tr|J9P616|J9P616_CANLF	tr|J9P616|J9P616_CANLF			J9P616				TMEM109	3	15	3	3	9.1	9.1	9.1	26.203	0	28.697	2593300000	29.7798	30.4518	29.1072	26.8689	27.5724	27.3285
+	1.84762	-2.49701	tr|E2QV61|E2QV61_CANLF;tr|F1Q3Q2|F1Q3Q2_CANLF	tr|E2QV61|E2QV61_CANLF;tr|F1Q3Q2|F1Q3Q2_CANLF			E2QV61				DAO	14	219	14	14	40.1	40.1	40.1	39.134	0	141.4	54530000000	35.2825	34.0743	33.2124	31.6479	31.6882	31.742
+	2.04665	-2.49028	tr|E2R1N7|E2R1N7_CANLF	tr|E2R1N7|E2R1N7_CANLF			E2R1N7				PCYOX1	9	24	9	9	20.4	20.4	20.4	56.704	0	28.397	3065300000	30.8353	30.0246	29.3558	27.6353	27.0312	28.0782
+	1.44373	-2.37001	tr|E2R7S5|E2R7S5_CANLF	tr|E2R7S5|E2R7S5_CANLF			E2R7S5				RSL1D1	7	18	7	7	17.3	17.3	17.3	54.91	0	47.109	1730100000	29.4293	29.1825	28.9375	27.4168	27.6997	25.3228
+	3.62765	-2.19654	tr|E2RPE9|E2RPE9_CANLF	tr|E2RPE9|E2RPE9_CANLF			E2RPE9				APMAP	14	47	14	14	36.1	36.1	36.1	46.282	0	60.112	7893900000	31.68	31.4139	31.108	29.294	29.2275	29.0908
+	1.34553	-2.15099	tr|J9NWM0|J9NWM0_CANLF	tr|J9NWM0|J9NWM0_CANLF			J9NWM0				SCAMP1	6	26	6	6	25.4	25.4	25.4	37.906	0	112.51	2888400000	30.0801	30	29.4781	26.28	28.1814	28.6439
+	1.29827	-2.10325	tr|E2RTL4|E2RTL4_CANLF	tr|E2RTL4|E2RTL4_CANLF			E2RTL4				PLOD3	8	7	8	8	14.5	14.5	14.5	84.715	0	20.739	493520000	27.8817	27.0679	26.9539	26.5689	24.2603	24.7645
+	1.10067	-2.07007	tr|F1PD72|F1PD72_CANLF	tr|F1PD72|F1PD72_CANLF			F1PD72				CRELD1	7	12	7	7	17.3	17.3	17.3	45.68	0	16.04	1120500000	29.3199	29.1044	26.6688	25.8391	26.3701	26.6737
+	2.27455	-2.00571	tr|J9NXJ4|J9NXJ4_CANLF;tr|F1PA36|F1PA36_CANLF	tr|J9NXJ4|J9NXJ4_CANLF;tr|F1PA36|F1PA36_CANLF			J9NXJ4				H6PD	8	19	8	8	12.7	12.7	12.7	89.108	0	28.128	1091300000	28.8893	28.6761	27.9179	26.9038	26.1889	26.3733
+	0.914787	-2.00459	tr|E2QW07|E2QW07_CANLF;tr|F1PZP8|F1PZP8_CANLF	tr|E2QW07|E2QW07_CANLF;tr|F1PZP8|F1PZP8_CANLF			E2QW07				ERGIC3	6	8	6	6	16.2	16.2	16.2	43.393	0	14.987	720020000	28.9389	28.2644	26.5092	NaN	25.9623	25.8368
+	1.99828	-1.93783	tr|E2RGE3|E2RGE3_CANLF	tr|E2RGE3|E2RGE3_CANLF			E2RGE3				P2RY11	3	5	3	3	4.3	4.3	4.3	63.035	0	5.1154	275430000	26.7924	26.4006	26.5987	25.0598	NaN	24.259
+	1.61029	-1.91329	tr|F6XY06|F6XY06_CANLF;tr|J9NY50|J9NY50_CANLF	tr|F6XY06|F6XY06_CANLF;tr|J9NY50|J9NY50_CANLF			F6XY06				POGLUT1	5	7	5	5	14.3	14.3	14.3	45.658	0	14.375	831700000	28.5223	28.5156	27.0738	26.6096	26.0041	25.758
+	1.38605	-1.84862	tr|F1PBY5|F1PBY5_CANLF;tr|E2RB88|E2RB88_CANLF	tr|F1PBY5|F1PBY5_CANLF;tr|E2RB88|E2RB88_CANLF			F1PBY5				TMEM87A	6	8	6	6	12.6	12.6	12.6	63.106	0	16.346	798060000	28.4598	28.2255	27.1802	26.4189	25.1603	26.7405
+	2.3386	-1.80861	tr|J9P4L2|J9P4L2_CANLF	tr|J9P4L2|J9P4L2_CANLF			J9P4L2				ERP29	9	34	9	9	26.2	26.2	26.2	41.667	0	64.339	5368600000	31.2294	30.8386	30.1852	29.1034	28.8323	28.8918
+	4.08891	-1.75843	sp|P24643|CALX_CANLF	sp|P24643|CALX_CANLF			P24643				CANX	3	208	29	29	37.1	37.1	5.6	67.603	0	323.31	33754000000	33.5641	33.3615	33.2149	31.663	31.652	31.5503
+	1.88162	-1.70282	tr|F1PMG8|F1PMG8_CANLF	tr|F1PMG8|F1PMG8_CANLF			F1PMG8				COLGALT1	6	14	6	6	9.6	9.6	9.6	71.814	0	16.662	1083500000	28.7262	28.7407	27.7038	27.0964	26.4366	26.5292
+	1.34043	-1.68605	tr|E2RLA5|E2RLA5_CANLF	tr|E2RLA5|E2RLA5_CANLF			E2RLA5				GOLM1	3	5	3	3	9.1	9.1	9.1	45.582	0	11.981	227610000	26.9634	25.7989	26.0513	24.2785	NaN	24.8919
+	1.58114	-1.67886	sp|P63091|GNAS_CANLF;tr|F6Y6T1|F6Y6T1_CANLF;tr|J9P7G0|J9P7G0_CANLF	sp|P63091|GNAS_CANLF;tr|F6Y6T1|F6Y6T1_CANLF			P63091				GNAS GNAS1	4	16	5	4	15.2	12.4	12.4	45.664	0	18.147	1035500000	28.1616	28.5696	28.0422	25.68	26.8526	27.2043
+	1.18479	-1.61118	tr|F1PIX5|F1PIX5_CANLF	tr|F1PIX5|F1PIX5_CANLF			F1PIX5				TMX3	6	7	6	6	13.9	13.9	13.9	51.513	0	11.614	1234700000	29.6957	28.0468	27.7738	27.3066	26.8203	26.5559
+	1.07019	-1.54154	tr|F1PIT7|F1PIT7_CANLF	tr|F1PIT7|F1PIT7_CANLF			F1PIT7				TMX4	3	9	3	3	11.9	11.9	11.9	33.468	0	14.35	851130000	28.812	28.1185	26.8859	25.6944	26.5187	26.9787
+	2.40243	-1.52473	tr|F1PLR3|F1PLR3_CANLF	tr|F1PLR3|F1PLR3_CANLF			F1PLR3				GPRC5C	7	21	7	7	20.4	20.4	20.4	48.209	0	59.931	2420300000	29.722	29.7906	29.0061	27.8971	28.0648	27.9826
+	1.66572	-1.45185	tr|E2RKL5|E2RKL5_CANLF	tr|E2RKL5|E2RKL5_CANLF			E2RKL5				LEMD2	5	7	5	5	11.2	11.2	11.2	62.107	0	20.8	1184000000	28.8952	28.7726	27.6673	26.9957	26.8702	27.1136
+	2.99582	-1.4081	tr|E2R925|E2R925_CANLF;tr|J9P0R7|J9P0R7_CANLF	tr|E2R925|E2R925_CANLF;tr|J9P0R7|J9P0R7_CANLF			E2R925				RTN4	8	114	8	8	13.7	13.7	13.7	129.34	0	104.51	7496500000	31.3762	31.0648	30.8829	29.8006	29.5456	29.7535
+	1.34315	-1.39677	tr|E2RML8|E2RML8_CANLF	tr|E2RML8|E2RML8_CANLF			E2RML8				MTX2	2	14	2	2	15.4	15.4	15.4	30.109	0	132.87	416920000	27.0162	26.6691	26.8906	24.848	26.3981	25.1395
+	2.17372	-1.30372	tr|E2RD92|E2RD92_CANLF	tr|E2RD92|E2RD92_CANLF			E2RD92				MLEC	9	29	9	9	35.3	35.3	35.3	32.064	0	86.222	3051800000	30.1509	29.8666	29.329	28.6249	28.4411	28.3695
+	1.07991	-1.24866	tr|E2RCC6|E2RCC6_CANLF	tr|E2RCC6|E2RCC6_CANLF			E2RCC6				CERS4	2	6	2	2	3.8	3.8	3.8	46.116	0.001078	3.2856	516490000	27.1584	27.0287	27.1445	26.4999	24.784	26.3018
+	2.22072	-1.1688	sp|P51147|RAB5C_CANLF	sp|P51147|RAB5C_CANLF			P51147				RAB5C	5	41	8	5	47.7	32.9	32.9	23.455	0	139.13	4180300000	30.4965	30.2087	29.8425	29.0484	28.8051	29.1877
+	1.51633	-1.14638	sp|O46674|AT2A2_CANLF;tr|J9P9P2|J9P9P2_CANLF;tr|E2RRB2|E2RRB2_CANLF;tr|J9P2B9|J9P2B9_CANLF;tr|E2RQY6|E2RQY6_CANLF	sp|O46674|AT2A2_CANLF			O46674				ATP2A2	19	58	19	19	22.8	22.8	22.8	109.65	0	133.86	5275200000	30.9472	30.6942	29.8839	29.6363	29.1907	29.2591
+	1.44143	-1.079	tr|F1PAR8|F1PAR8_CANLF;tr|J9P0Q7|J9P0Q7_CANLF;tr|J9P9X2|J9P9X2_CANLF	tr|F1PAR8|F1PAR8_CANLF;tr|J9P0Q7|J9P0Q7_CANLF			F1PAR8				PHB	15	68	15	15	50.9	50.9	50.9	29.723	0	131.04	21066000000	32.843	32.781	31.795	31.3053	31.546	31.3309
+	2.71988	-1.06399	tr|F1P8N6|F1P8N6_CANLF;sp|P41148|ENPL_CANLF	tr|F1P8N6|F1P8N6_CANLF;sp|P41148|ENPL_CANLF			F1P8N6				HSP90B1	34	140	36	36	41.5	41.5	39.7	92.384	0	323.31	36932000000	33.4473	33.3381	33.0647	32.3876	32.2006	32.07
+	1.14877	-1.05251	sp|P16967|SSRA_CANLF;tr|A0A0A0MPC0|A0A0A0MPC0_CANLF	sp|P16967|SSRA_CANLF;tr|A0A0A0MPC0|A0A0A0MPC0_CANLF			P16967				SSR1	3	17	3	3	11.9	11.9	11.9	31.976	0	13.412	1871200000	29.5039	29.2749	28.1158	27.8829	27.977	27.8772
+	1.58591	-0.925065	tr|E2QY93|E2QY93_CANLF	tr|E2QY93|E2QY93_CANLF			E2QY93				NCLN	10	31	10	10	20.1	20.1	20.1	63.1	0	32.875	2032300000	28.4953	29.1285	29.2568	28.2768	27.8426	27.986
+	1.9158	-0.920052	tr|J9NWS8|J9NWS8_CANLF	tr|J9NWS8|J9NWS8_CANLF			J9NWS8				RDH14	8	26	8	8	20.9	20.9	20.9	41.268	0	30.514	2130300000	28.9017	29.4827	28.8449	28.1695	28.0531	28.2466
+	1.13049	-0.874929	tr|E2R4T7|E2R4T7_CANLF;tr|E2R4T5|E2R4T5_CANLF	tr|E2R4T7|E2R4T7_CANLF;tr|E2R4T5|E2R4T5_CANLF			E2R4T7				HSD17B4	23	86	23	23	35	35	35	79.689	0	218.24	13688000000	32.1112	32.1353	31.0566	31.0478	30.8161	30.8143
+	1.32901	-0.867646	tr|E2RK67|E2RK67_CANLF	tr|E2RK67|E2RK67_CANLF			E2RK67				TMX1	10	45	10	10	28.8	28.8	28.8	31.515	0	88.939	14062000000	32.3601	31.7865	31.3192	31.058	30.9165	30.8883
+	2.37256	-0.830282	tr|E2QYL0|E2QYL0_CANLF	tr|E2QYL0|E2QYL0_CANLF			E2QYL0				TMED10	8	54	8	8	38.4	38.4	38.4	25.226	0	90.97	13829000000	31.9034	31.9156	31.4925	30.9732	30.8855	30.962
+	2.05598	-0.808451	tr|F1PSN8|F1PSN8_CANLF;tr|F1PQY5|F1PQY5_CANLF;tr|F1PA85|F1PA85_CANLF	tr|F1PSN8|F1PSN8_CANLF;tr|F1PQY5|F1PQY5_CANLF			F1PSN8				ESRP1	6	11	6	6	14	14	14	70.262	0	28.122	1068100000	28.0578	27.9008	28.1412	27.1438	27.0083	27.5224
+	1.88751	-0.782086	tr|G1K299|G1K299_CANLF;sp|O18835|BGLR_CANLF	tr|G1K299|G1K299_CANLF;sp|O18835|BGLR_CANLF			G1K299				GUSB	7	27	7	7	13.7	13.7	13.7	74.446	0	17.108	1626300000	28.9886	28.627	28.3971	28.0115	27.8491	27.8057
+	1.15854	-0.755115	tr|E2QY54|E2QY54_CANLF	tr|E2QY54|E2QY54_CANLF			E2QY54				SSR4	5	47	5	5	36.4	36.4	36.4	18.943	0	59.542	6228200000	31.1851	30.1974	30.3799	29.9038	29.7541	29.8391
+	1.40643	-0.683687	tr|F1P9Z8|F1P9Z8_CANLF	tr|F1P9Z8|F1P9Z8_CANLF			F1P9Z8				PLOD1	6	10	6	6	9.9	9.9	9.9	83.58	0	45.811	668330000	26.8933	27.624	27.3182	26.4724	26.5666	26.7455
+	1.23886	-0.603748	tr|E2RCA0|E2RCA0_CANLF	tr|E2RCA0|E2RCA0_CANLF			E2RCA0				AGPAT1	4	29	4	4	18.1	18.1	18.1	32.176	0	116.79	1768300000	28.6285	29.0923	28.3335	28.193	27.9875	28.0625
+	1.22482	-0.601437	sp|B6V8E6|CTNB1_CANLF	sp|B6V8E6|CTNB1_CANLF			B6V8E6				CTNNB1	20	103	24	20	35.3	32.1	32.1	85.51	0	323.31	10570000000	31.4478	31.3152	31.0693	30.9067	30.8484	30.2729
+	2.34985	-0.564066	sp|P33724|CAV1_CANLF;tr|F1PWG1|F1PWG1_CANLF	sp|P33724|CAV1_CANLF			P33724				CAV1 CAV	9	73	9	9	47.8	47.8	47.8	20.605	0	92.391	21873000000	32.2232	32.4705	32.1962	31.7186	31.6645	31.8147
+	1.5642	-0.5588	sp|Q5TJE4|TPSN_CANLF	sp|Q5TJE4|TPSN_CANLF			Q5TJE4				TAPBP	9	34	9	9	24.9	24.9	24.9	47.773	0	44.231	3479000000	29.518	29.438	29.8856	28.9703	29.234	28.9609
+	2.09126	-0.29287	tr|F6XD36|F6XD36_CANLF;tr|J9P3R0|J9P3R0_CANLF	tr|F6XD36|F6XD36_CANLF			F6XD36				TMED9	7	49	7	7	32.4	32.4	32.4	27.708	0	159.71	9324000000	30.946	31.0328	30.8491	30.7045	30.614	30.6309
+	1.97289	0.419002	tr|F1PTR3|F1PTR3_CANLF	tr|F1PTR3|F1PTR3_CANLF			F1PTR3				ACSF2	18	96	18	18	41.3	41.3	41.3	67.843	0	302.35	13553000000	31.2399	31.0531	30.9572	31.5832	31.4761	31.4479
+	1.36676	0.481617	tr|J9JHJ2|J9JHJ2_CANLF;tr|E2RJ06|E2RJ06_CANLF	tr|J9JHJ2|J9JHJ2_CANLF;tr|E2RJ06|E2RJ06_CANLF			J9JHJ2				RPSA LOC106559170	9	51	9	9	37.3	37.3	37.3	32.898	0	132.87	8079300000	30.5622	30.1594	30.1488	30.616	30.763	30.9364
+	1.63118	0.505689	tr|F1PRH1|F1PRH1_CANLF	tr|F1PRH1|F1PRH1_CANLF			F1PRH1				ABCB6	13	35	13	13	17.3	17.3	17.3	107.26	0	73.433	2825800000	28.9419	28.5577	28.7635	29.2538	29.1109	29.4155
+	3.04038	0.627002	sp|P62999|RAC1_CANLF;tr|F1P7Q4|F1P7Q4_CANLF;tr|F1PYQ1|F1PYQ1_CANLF;tr|E2RJH1|E2RJH1_CANLF;tr|F1PW88|F1PW88_CANLF;tr|E2QU83|E2QU83_CANLF;tr|F1PYF1|F1PYF1_CANLF	sp|P62999|RAC1_CANLF;tr|F1P7Q4|F1P7Q4_CANLF;tr|F1PYQ1|F1PYQ1_CANLF			P62999				RAC1	10	70	11	11	50.5	50.5	44.8	21.45	0	57.094	27024000000	31.9164	31.813	32.0551	32.5493	32.5389	32.5772
+	1.53648	0.663551	tr|E2RKQ6|E2RKQ6_CANLF	tr|E2RKQ6|E2RKQ6_CANLF			E2RKQ6				LGALS3BP	10	43	10	10	24.5	24.5	24.5	62.21	0	108.09	5013300000	29.3549	29.1715	29.8295	30.1213	30.0516	30.1737
+	1.61587	0.695147	sp|P38486|LEG3_CANLF;tr|F6PME1|F6PME1_CANLF	sp|P38486|LEG3_CANLF;tr|F6PME1|F6PME1_CANLF			P38486				LGALS3	18	469	18	18	40.9	40.9	40.9	30.33	0	323.31	320260000000	35.8544	35.27	35.2829	36.2448	36.1285	36.1194
+	1.40308	0.717304	sp|Q95KM6|CLD2_CANLF;tr|J9NUV1|J9NUV1_CANLF	sp|Q95KM6|CLD2_CANLF;tr|J9NUV1|J9NUV1_CANLF			Q95KM6				CLDN2	5	28	5	5	27.4	27.4	27.4	24.502	0	99.563	11659000000	30.7767	30.229	30.9307	31.495	31.4423	31.1512
+	2.34463	0.745127	tr|F1PWW0|F1PWW0_CANLF	tr|F1PWW0|F1PWW0_CANLF			F1PWW0				FLNA	54	174	62	55	29.7	28.4	28.1	280.66	0	321.35	16776000000	31.3593	31.1329	31.0178	31.7516	31.9898	32.004
+	1.77213	0.821923	tr|E2RIG0|E2RIG0_CANLF	tr|E2RIG0|E2RIG0_CANLF			E2RIG0				NDUFA10	11	59	11	11	39	39	39	39.873	0	178.94	5783100000	29.9932	29.4188	29.3608	30.5041	30.3242	30.4103
+	2.03361	0.855636	tr|F1P625|F1P625_CANLF	tr|F1P625|F1P625_CANLF			F1P625				MMP15	8	21	9	8	19.7	18.7	18.7	76.687	0	37.338	1884100000	28.0164	27.6474	28.1222	29.0063	28.6775	28.6691
+	1.535	0.85845	tr|E2R0Y5|E2R0Y5_CANLF	tr|E2R0Y5|E2R0Y5_CANLF			E2R0Y5				SUCLG1	9	44	9	9	37.3	37.3	37.3	36.109	0	77.969	7285800000	29.8028	29.7711	29.9399	30.2634	30.687	31.1387
+	1.54756	0.861312	tr|E2RR02|E2RR02_CANLF	tr|E2RR02|E2RR02_CANLF			E2RR02				CTSF	3	14	3	3	7.8	7.8	7.8	50.94	0	53.238	1088800000	27.0764	26.8759	27.3455	27.9193	27.6064	28.3561
+	1.31768	0.875495	tr|F1Q1M8|F1Q1M8_CANLF	tr|F1Q1M8|F1Q1M8_CANLF			F1Q1M8				HEXB	8	18	8	8	24.4	24.4	24.4	51.92	0	96.769	3330100000	28.3554	28.7372	28.9323	29.1779	29.4202	30.0532
+	1.0525	0.946002	tr|F6XTD9|F6XTD9_CANLF	tr|F6XTD9|F6XTD9_CANLF			F6XTD9				NUP155	15	41	15	15	16	16	16	155.13	0	300.66	3109400000	28.8595	27.751	29.0599	29.7271	29.3736	29.4077
+	1.0607	0.947389	tr|E2QUQ5|E2QUQ5_CANLF	tr|E2QUQ5|E2QUQ5_CANLF			E2QUQ5				WLS	5	11	5	5	10	10	10	62.075	0	11.289	622210000	26.5373	25.4234	26.745	27.2719	27.27	27.0059
+	1.70052	0.980726	tr|F1PC58|F1PC58_CANLF;tr|J9JHD4|J9JHD4_CANLF	tr|F1PC58|F1PC58_CANLF;tr|J9JHD4|J9JHD4_CANLF			F1PC58				ACAT1	13	89	13	13	37.5	37.5	37.5	43.989	0	278.61	9414200000	29.6589	30.2078	30.5354	31.2003	31.1304	31.0135
+	3.86785	0.993487	tr|E2RS95|E2RS95_CANLF	tr|E2RS95|E2RS95_CANLF			E2RS95				TM7SF2	4	19	4	4	9.1	9.1	9.1	46.625	0	9.8294	2086800000	28.0176	28.0938	27.8631	29.0077	28.9839	28.9635
+	3.1088	1.0007	tr|F1PLG2|F1PLG2_CANLF	tr|F1PLG2|F1PLG2_CANLF			F1PLG2				NNT	16	62	16	16	18.3	18.3	18.3	113.89	0	101.8	7218900000	29.7446	29.5957	29.9498	30.7155	30.8351	30.7416
+	1.52223	1.04082	tr|F1PZW8|F1PZW8_CANLF	tr|F1PZW8|F1PZW8_CANLF			F1PZW8				GNA13	8	23	9	9	29.1	29.1	26.4	34.242	0	34.87	3275100000	28.3409	28.2784	29.0621	29.8557	29.7209	29.2273
+	2.34167	1.05729	tr|F1P9U5|F1P9U5_CANLF	tr|F1P9U5|F1P9U5_CANLF			F1P9U5				SLC44A4	3	7	3	3	3.8	3.8	3.8	78.876	0	5.5427	742930000	26.6507	26.3597	26.3521	27.7138	27.6152	27.2055
+	4.8008	1.21207	tr|F1PJL3|F1PJL3_CANLF	tr|F1PJL3|F1PJL3_CANLF			F1PJL3				IGSF11	4	9	4	4	9.3	9.3	9.3	46.345	0	8.9566	1042300000	26.7838	26.8495	26.8365	28.0637	27.9478	28.0946
+	2.13501	1.2193	tr|E2R4C1|E2R4C1_CANLF	tr|E2R4C1|E2R4C1_CANLF			E2R4C1				M6PR	11	46	11	11	25.3	25.3	25.3	43.246	0	83.191	11294000000	29.9812	30.0276	30.6689	31.5456	31.2504	31.5397
+	2.06285	1.23174	tr|F1PC23|F1PC23_CANLF	tr|F1PC23|F1PC23_CANLF			F1PC23				SLC39A4	9	67	9	9	24	24	24	62.716	0	197.61	9366100000	29.6502	29.9115	30.2877	31.398	31.3178	30.8288
+	0.969866	1.2994	tr|F1PCI3|F1PCI3_CANLF;tr|F1PEY9|F1PEY9_CANLF	tr|F1PCI3|F1PCI3_CANLF			F1PCI3				DHRS4	2	11	3	3	14	14	6.5	29.634	0	5.7614	973400000	25.9507	NaN	27.4463	27.8496	27.9707	28.1734
+	1.31451	1.35469	tr|F1Q332|F1Q332_CANLF	tr|F1Q332|F1Q332_CANLF			F1Q332				GARS	11	20	11	11	16.6	16.6	16.6	88.94	0	29.91	1811800000	26.7978	27.1209	28.3784	28.8107	28.8076	28.7429
+	2.32648	1.38991	tr|E2RIM8|E2RIM8_CANLF	tr|E2RIM8|E2RIM8_CANLF			E2RIM8				HEXA	3	6	3	3	8.5	8.5	8.5	60.55	0	14.291	782330000	26.7372	26.0843	26.019	27.6452	27.5379	27.827
+	2.59446	1.40534	tr|E2RMC0|E2RMC0_CANLF;tr|F1PW86|F1PW86_CANLF;tr|F1PIQ7|F1PIQ7_CANLF;tr|F1Q0H6|F1Q0H6_CANLF	tr|E2RMC0|E2RMC0_CANLF			E2RMC0				ITPR3	29	71	29	29	13.8	13.8	13.8	303.7	0	165.97	4722600000	28.6307	28.6419	29.2442	30.3375	30.2326	30.1628
+	1.11806	1.40808	tr|F6X717|F6X717_CANLF	tr|F6X717|F6X717_CANLF			F6X717				ITGB8	6	6	6	6	10.9	10.9	10.9	86.782	0	11.452	466120000	NaN	24.9268	26.1623	27.1904	27.1157	26.5518
+	1.50956	1.42302	tr|E2QUR7|E2QUR7_CANLF;tr|E2QUR6|E2QUR6_CANLF	tr|E2QUR7|E2QUR7_CANLF;tr|E2QUR6|E2QUR6_CANLF			E2QUR7				GPNMB	6	31	6	6	8.1	8.1	8.1	61.73	0	42.486	14184000000	30.3901	29.6367	31.1191	31.968	31.7	31.7469
+	2.30803	1.46	tr|J9P6J1|J9P6J1_CANLF;tr|F1Q3G6|F1Q3G6_CANLF	tr|J9P6J1|J9P6J1_CANLF;tr|F1Q3G6|F1Q3G6_CANLF			J9P6J1				MUC1	8	35	8	8	25	25	25	30.934	0	42.509	6715600000	29.2196	29.1122	29.563	30.9248	31.0301	30.32
+	1.18025	1.47298	tr|F1Q2J3|F1Q2J3_CANLF;tr|J9P6S2|J9P6S2_CANLF;tr|Q5KU49|Q5KU49_CANLF;tr|F1PGY7|F1PGY7_CANLF	tr|F1Q2J3|F1Q2J3_CANLF			F1Q2J3				SLC12A6	8	14	8	8	7	7	7	127.76	0	26.672	630080000	24.885	25.6498	26.8338	27.1181	27.5652	27.1043
+	1.50518	1.53673	tr|J9NV57|J9NV57_CANLF	tr|J9NV57|J9NV57_CANLF			J9NV57				TM2D2	2	5	2	2	13.1	13.1	13.1	22.925	0	10.514	1109900000	25.7589	26.6508	27.3889	28.1703	28.0756	28.1628
+	2.2403	1.55393	tr|E2RC10|E2RC10_CANLF	tr|E2RC10|E2RC10_CANLF			E2RC10				SYPL1	5	53	5	5	31.6	31.6	31.6	24.518	0	131.15	13200000000	30.0069	29.8175	30.7619	31.7468	31.7644	31.7368
+	1.17054	1.59007	tr|E2RKS8|E2RKS8_CANLF	tr|E2RKS8|E2RKS8_CANLF			E2RKS8				PIGO	9	22	9	9	38.8	38.8	38.8	38.57	0	73.361	1390700000	26.2151	26.2548	27.9777	28.2894	28.9125	28.0159
+	1.38318	1.61071	tr|J9P9A6|J9P9A6_CANLF	tr|J9P9A6|J9P9A6_CANLF			J9P9A6				LHFPL2	4	15	4	4	21.9	21.9	21.9	19.701	0	34.196	2419600000	27.6176	26.7774	28.5965	29.5246	29.2497	29.0492
+	1.13905	1.64112	tr|E2R294|E2R294_CANLF;tr|E2R293|E2R293_CANLF	tr|E2R294|E2R294_CANLF;tr|E2R293|E2R293_CANLF			E2R294				NDC1	4	12	4	4	6.8	6.8	6.8	76.144	0	8.1144	713790000	25.8222	26.7923	24.8996	27.3979	28.2101	26.8294
+	1.54194	1.64233	tr|E2RJ93|E2RJ93_CANLF	tr|E2RJ93|E2RJ93_CANLF			E2RJ93				GLS	4	8	4	4	5.2	5.2	5.2	83.021	0	11.149	474860000	24.6454	25.9383	25.2303	26.5779	27.5502	26.613
+	1.44996	1.67495	tr|E2RG27|E2RG27_CANLF;tr|E2RG59|E2RG59_CANLF	tr|E2RG27|E2RG27_CANLF;tr|E2RG59|E2RG59_CANLF			E2RG27				KTN1	47	206	47	47	38.8	38.8	38.8	156.56	0	323.31	32564000000	30.7419	30.9357	32.3663	33.145	33.218	32.7056
+	1.04404	1.7108	tr|F1PDK3|F1PDK3_CANLF;tr|F1PWH9|F1PWH9_CANLF;sp|Q9TRY9|BGAL_CANLF	tr|F1PDK3|F1PDK3_CANLF;tr|F1PWH9|F1PWH9_CANLF;sp|Q9TRY9|BGAL_CANLF			F1PDK3				GLB1	2	7	2	2	5.5	5.5	5.5	66.546	0	18.521	814750000	24.738	27.2094	25.881	27.0828	27.881	27.997
+	1.46478	1.76734	tr|F1P776|F1P776_CANLF;sp|Q9XT82|PE2R2_CANLF	tr|F1P776|F1P776_CANLF;sp|Q9XT82|PE2R2_CANLF			F1P776				PTGER2	2	6	2	2	7.2	7.2	7.2	40.449	0	269.19	744480000	NaN	25.335	26.5267	27.5715	27.9707	27.5524
+	2.40309	1.77338	tr|F1PHQ7|F1PHQ7_CANLF	tr|F1PHQ7|F1PHQ7_CANLF			F1PHQ7				ATP2B4	10	66	17	17	17.8	17.8	10	133.85	0	127.69	7111100000	28.7811	29.0801	29.5204	31.1808	31.0201	30.5008
+	2.55749	1.84069	sp|P48300|FUCO_CANLF;tr|F1PAF0|F1PAF0_CANLF	sp|P48300|FUCO_CANLF;tr|F1PAF0|F1PAF0_CANLF			P48300				FUCA1	6	30	6	6	14.6	14.6	14.6	53.757	0	177.65	5353500000	28.1765	28.6888	29.1396	30.5579	30.5182	30.4508
+	1.4864	1.8562	tr|F1PIG0|F1PIG0_CANLF	tr|F1PIG0|F1PIG0_CANLF			F1PIG0				TGFBR3	5	9	5	5	7.7	7.7	7.7	94.215	0	23.996	1396300000	26.4504	25.7927	27.7541	28.5262	28.6059	28.4337
+	1.80933	1.89826	tr|E2RIB8|E2RIB8_CANLF	tr|E2RIB8|E2RIB8_CANLF			E2RIB8				RBM28	2	7	2	2	3.1	3.1	3.1	85.166	0	5.0702	5803400000	29.6699	28.1613	28.4381	30.64	30.5403	30.7837
+	1.64362	1.93184	tr|E2RNC2|E2RNC2_CANLF;tr|E2RBN4|E2RBN4_CANLF;tr|L7N0I6|L7N0I6_CANLF	tr|E2RNC2|E2RNC2_CANLF			E2RNC2				CLDN4	5	28	6	6	26.7	26.7	19	22.091	0	65.458	6048700000	28.9239	27.8404	29.4385	30.8595	30.9809	30.1579
+	1.24273	1.94705	tr|E2RGR9|E2RGR9_CANLF	tr|E2RGR9|E2RGR9_CANLF			E2RGR9				FH	11	44	11	11	28.5	28.5	28.5	54.451	0	83.316	2932000000	28.2962	26.2267	28.5071	29.8419	29.5166	29.5127
+	1.8259	1.94976	tr|J9NZA9|J9NZA9_CANLF;tr|F1PBA1|F1PBA1_CANLF;sp|P50997|AT1A1_CANLF	tr|J9NZA9|J9NZA9_CANLF;tr|F1PBA1|F1PBA1_CANLF;sp|P50997|AT1A1_CANLF			J9NZA9				ATP1A1	35	1202	59	59	52.3	52.3	29.5	112.81	0	323.31	449620000000	34.6977	34.4813	35.588	37.425	36.9233	36.2681
+	1.17727	1.95802	sp|Q2THW9|ZDHC5_CANLF;tr|G1K291|G1K291_CANLF	sp|Q2THW9|ZDHC5_CANLF;tr|G1K291|G1K291_CANLF			Q2THW9				ZDHHC5	7	11	7	7	15.5	15.5	15.5	77.384	0	72.614	924350000	25.0303	25.9264	26.5678	28.772	28.0405	26.5861
+	1.78345	2.02116	tr|F1P9K1|F1P9K1_CANLF	tr|F1P9K1|F1P9K1_CANLF			F1P9K1				IGSF3	49	205	49	49	48.8	48.8	48.8	134.1	0	323.31	40529000000	31.0523	30.7831	32.3822	33.6568	33.3662	33.2581
+	2.29193	2.13086	tr|J9P4T2|J9P4T2_CANLF;tr|E2R508|E2R508_CANLF;tr|J9P001|J9P001_CANLF;tr|J9NZY6|J9NZY6_CANLF;tr|J9PAG8|J9PAG8_CANLF	tr|J9P4T2|J9P4T2_CANLF;tr|E2R508|E2R508_CANLF;tr|J9P001|J9P001_CANLF			J9P4T2				ADAM9	28	133	28	28	40.9	40.9	40.9	72.143	0	323.31	27833000000	30.2655	30.585	31.5327	33.002	32.9193	32.8545
+	1.01072	2.16601	tr|E2RMA6|E2RMA6_CANLF	tr|E2RMA6|E2RMA6_CANLF			E2RMA6				SLC39A6	5	14	5	5	6.8	6.8	6.8	82.622	0	44.928	1441200000	25.3019	NaN	27.7075	28.7459	28.831	28.4353
+	1.54962	2.19407	tr|J9NVI2|J9NVI2_CANLF	tr|J9NVI2|J9NVI2_CANLF			J9NVI2				BST2	6	18	6	6	19.7	19.7	19.7	20.627	0	58.63	2771900000	26.4716	26.9891	28.6273	29.6634	29.5425	29.4643
+	1.57757	2.19677	tr|E2R0Z0|E2R0Z0_CANLF;tr|J9NXY3|J9NXY3_CANLF;tr|E2R971|E2R971_CANLF	tr|E2R0Z0|E2R0Z0_CANLF			E2R0Z0				CDH6	23	222	27	27	29.3	29.3	23.5	88.65	0	323.31	95510000000	31.705	31.9727	33.7298	34.7706	34.7132	34.514
+	1.47561	2.20733	tr|E2RSW3|E2RSW3_CANLF	tr|E2RSW3|E2RSW3_CANLF			E2RSW3				FRRS1	8	21	8	8	14.4	14.4	14.4	65.786	0	29.281	3039700000	27.2898	26.3973	28.7712	29.7245	29.7456	29.6101
+	1.85918	2.29199	tr|F1P984|F1P984_CANLF	tr|F1P984|F1P984_CANLF			F1P984				SPINT2	12	59	12	12	42.5	42.5	42.5	28.053	0	267.98	14356000000	29.0878	29.1733	30.7695	32.0101	31.9556	31.9409
+	1.74839	2.35192	tr|E2QUE4|E2QUE4_CANLF	tr|E2QUE4|E2QUE4_CANLF			E2QUE4				EFNA1	3	11	3	3	20	20	20	23.84	0	17.945	859140000	24.7691	25.1791	26.7108	28.1192	27.9418	27.6538
+	1.92762	2.37996	tr|J9P2T1|J9P2T1_CANLF;tr|F1PDU1|F1PDU1_CANLF	tr|J9P2T1|J9P2T1_CANLF;tr|F1PDU1|F1PDU1_CANLF			J9P2T1				NEO1	17	33	17	17	17.4	17.4	17.4	159.35	0	65.655	1862200000	26.1169	26.1598	27.6941	29.315	29.0315	28.7642
+	1.30691	2.39239	tr|F1Q431|F1Q431_CANLF;tr|E2R0K0|E2R0K0_CANLF	tr|F1Q431|F1Q431_CANLF			F1Q431				SLC22A2	3	6	3	3	7.3	7.3	7.3	59.162	0	12.928	586060000	24.053	NaN	26.0288	27.5711	27.49	27.2387
+	2.07698	2.42473	sp|Q00589|SC6A6_CANLF	sp|Q00589|SC6A6_CANLF			Q00589				SLC6A6	6	18	6	6	9.4	9.4	9.4	69.728	0	34.053	3300600000	26.5998	27.6123	28.1437	30.1877	29.974	29.4683
+	1.62428	2.43037	tr|J9P0K9|J9P0K9_CANLF	tr|J9P0K9|J9P0K9_CANLF			J9P0K9				CLDN1	5	16	5	5	22.3	22.3	22.3	22.787	0	33.508	3177400000	26.4122	27.0745	28.5427	30.3094	29.5111	29.5
+	2.15814	2.43441	sp|P25473|CLUS_CANLF;tr|E2QYU2|E2QYU2_CANLF;P17697;CON__P17697	sp|P25473|CLUS_CANLF;tr|E2QYU2|E2QYU2_CANLF			P25473				CLU	17	88	17	17	31.9	31.9	31.9	51.789	0	190.53	12976000000	28.7531	29.1817	30.3371	31.8625	31.9579	31.7549
+	1.49637	2.46681	tr|F6Y3U7|F6Y3U7_CANLF	tr|F6Y3U7|F6Y3U7_CANLF			F6Y3U7				COL18A1	14	134	14	14	15	15	15	151.63	0	323.31	29796000000	30.2295	29.6648	31.5102	33.7181	33.1699	31.9168
+	1.6203	2.47345	tr|E2R3X4|E2R3X4_CANLF;sp|Q28269|OCLN_CANLF;tr|F1PZF7|F1PZF7_CANLF;tr|J9P475|J9P475_CANLF	tr|E2R3X4|E2R3X4_CANLF;sp|Q28269|OCLN_CANLF;tr|F1PZF7|F1PZF7_CANLF;tr|J9P475|J9P475_CANLF			E2R3X4				OCLN	9	47	9	9	26	26	26	59.16	0	103.99	7096000000	27.7471	27.8459	29.8173	30.9824	31.2376	30.6107
+	1.66179	2.48213	tr|E2RN10|E2RN10_CANLF	tr|E2RN10|E2RN10_CANLF			E2RN10				B2M	6	26	6	6	24.8	24.8	24.8	14.263	0	61.265	8505300000	27.9922	28.1255	30.089	31.3022	31.1095	31.2414
+	1.00747	2.50424	tr|F1PQ05|F1PQ05_CANLF	tr|F1PQ05|F1PQ05_CANLF			F1PQ05				ERBB4	16	30	18	16	18.5	16.9	16.9	140.22	0	68.158	3521900000	26.0906	NaN	28.8718	30.1548	30.1253	29.6761
+	2.16095	2.51922	tr|F1PID4|F1PID4_CANLF;tr|J9P7C6|J9P7C6_CANLF;sp|Q52S86|PODXL_CANLF	tr|F1PID4|F1PID4_CANLF;tr|J9P7C6|J9P7C6_CANLF;sp|Q52S86|PODXL_CANLF			F1PID4				PODXL	17	99	17	17	26	26	26	57.268	0	323.31	42236000000	30.3372	30.8228	31.9959	33.5767	33.5594	33.5776
+	1.69577	2.51944	tr|F1PCN5|F1PCN5_CANLF	tr|F1PCN5|F1PCN5_CANLF			F1PCN5				FZD1	4	7	4	4	6	6	6	71.526	0	9.7747	834840000	24.7244	NaN	26.1979	28.0489	28.051	27.8421
+	0.930222	2.54045	tr|F1P7Q7|F1P7Q7_CANLF;tr|F1P7R0|F1P7R0_CANLF	tr|F1P7Q7|F1P7Q7_CANLF;tr|F1P7R0|F1P7R0_CANLF			F1P7Q7				FAS	8	25	8	8	33.7	33.7	33.7	35.6	0	172.35	2515000000	NaN	25.4911	28.2585	29.9407	28.583	29.722
+	1.39863	2.56509	tr|E2R2V6|E2R2V6_CANLF	tr|E2R2V6|E2R2V6_CANLF			E2R2V6				L1CAM	45	262	46	46	39.7	39.7	39.2	140.05	0	323.31	77452000000	30.8953	31.0363	33.5078	34.5834	34.326	34.2252
+	2.77841	2.57688	tr|F1P9W5|F1P9W5_CANLF;tr|E2RRI1|E2RRI1_CANLF	tr|F1P9W5|F1P9W5_CANLF			F1P9W5				SLC12A2	37	160	37	37	36.9	36.9	36.9	110.53	0	323.31	66544000000	31.4617	31.2341	32.3357	34.1765	34.3858	34.1999
+	1.47302	2.57941	tr|F1PGR0|F1PGR0_CANLF	tr|F1PGR0|F1PGR0_CANLF			F1PGR0				ADAM10	35	343	35	35	43.5	43.5	43.5	85.069	0	323.31	144390000000	31.7378	32.0792	34.3129	35.4397	35.1426	35.2858
+	1.33982	2.59741	tr|E2REA9|E2REA9_CANLF	tr|E2REA9|E2REA9_CANLF			E2REA9				ITGA2	56	550	56	56	43.4	43.4	43.4	129.67	0	323.31	184580000000	32.1557	32.0851	34.8356	35.7271	35.5665	35.5751
+	1.73436	2.60811	sp|P06583|AT1B1_CANLF;tr|J9P7J0|J9P7J0_CANLF;tr|F1PMF0|F1PMF0_CANLF	sp|P06583|AT1B1_CANLF;tr|J9P7J0|J9P7J0_CANLF;tr|F1PMF0|F1PMF0_CANLF			P06583				ATP1B1	27	225	27	27	48.2	48.2	48.2	35.239	0	323.31	267760000000	32.8171	33.0715	34.936	36.3711	36.3011	35.9766
+	2.27195	2.64561	tr|E2RBB2|E2RBB2_CANLF	tr|E2RBB2|E2RBB2_CANLF			E2RBB2				TMEM63B	5	8	5	5	5.5	5.5	5.5	95.174	0	25.14	955450000	26.1203	25.4886	24.8488	28.5243	28.3541	27.5161
+	1.53062	2.64863	tr|F1PM51|F1PM51_CANLF;tr|F1Q1M9|F1Q1M9_CANLF	tr|F1PM51|F1PM51_CANLF;tr|F1Q1M9|F1Q1M9_CANLF			F1PM51				EPCAM	24	521	24	24	44.6	44.6	44.6	35.357	0	323.31	315080000000	32.9907	33.0005	35.355	36.6185	36.5133	36.1604
+	0.886434	2.65008	tr|F1PY07|F1PY07_CANLF;tr|J9P1D9|J9P1D9_CANLF	tr|F1PY07|F1PY07_CANLF			F1PY07				SIGIRR	6	14	6	6	24.2	24.2	24.2	41.383	0	33.644	1666300000	NaN	24.5896	27.8193	29.4355	28.849	28.279
+	1.37604	2.67033	tr|E2RGW9|E2RGW9_CANLF	tr|E2RGW9|E2RGW9_CANLF			E2RGW9				CNNM3	16	65	17	16	30.9	29.7	29.7	76.204	0	104.44	7344000000	28.0482	26.9623	29.9416	31.3357	31.1266	30.5008
+	1.6441	2.67034	tr|F1PFM5|F1PFM5_CANLF	tr|F1PFM5|F1PFM5_CANLF			F1PFM5				LAMB3	48	160	48	48	56.9	56.9	56.9	129.32	0	323.31	26666000000	30.1811	29.2808	30.9114	33.6807	32.9778	31.7258
+	1.67196	2.69647	tr|F1P787|F1P787_CANLF;tr|F1P783|F1P783_CANLF	tr|F1P787|F1P787_CANLF;tr|F1P783|F1P783_CANLF			F1P787				VLDLR	7	9	7	7	10.3	10.3	10.3	93.554	0	19.819	1115200000	NaN	24.8899	26.519	28.3839	28.4436	28.3751
+	1.51549	2.70081	tr|E2RBL9|E2RBL9_CANLF	tr|E2RBL9|E2RBL9_CANLF			E2RBL9				ITGB6	38	377	38	38	50.2	50.2	50.2	88.344	0	323.31	115130000000	31.426	31.5044	33.9152	35.1754	34.9527	34.8198
+	2.43049	2.70715	tr|E2RJT2|E2RJT2_CANLF	tr|E2RJT2|E2RJT2_CANLF			E2RJT2				BST1	11	32	11	11	34.2	34.2	34.2	35.387	0	46.577	6207800000	27.8275	NaN	28.579	31.1508	30.8831	30.6973
+	1.51169	2.72003	tr|E2R2Z8|E2R2Z8_CANLF;tr|F1PKF1|F1PKF1_CANLF	tr|E2R2Z8|E2R2Z8_CANLF;tr|F1PKF1|F1PKF1_CANLF			E2R2Z8				TMEM30A	8	33	9	9	27.7	27.7	25.5	40.691	0	96.586	3706600000	25.9757	27.1548	28.7854	29.9882	30.3334	29.7544
+	1.29682	2.76752	tr|E2QV99|E2QV99_CANLF;tr|J9JHC5|J9JHC5_CANLF;tr|F1PJA4|F1PJA4_CANLF;tr|F1PUZ1|F1PUZ1_CANLF;tr|J9P5Q0|J9P5Q0_CANLF;tr|E2RSY9|E2RSY9_CANLF	tr|E2QV99|E2QV99_CANLF			E2QV99				ATP8B1	21	51	23	23	21.9	21.9	20.6	143.96	0	114.79	5669100000	26.3262	27.7969	29.136	31.2532	30.9438	29.3646
+	1.21769	2.7923	tr|F1PWT3|F1PWT3_CANLF	tr|F1PWT3|F1PWT3_CANLF			F1PWT3				DNASE1L1	10	33	10	10	36.3	36.3	36.3	33.36	0	59.328	4628800000	27.3136	25.7888	29.4587	30.639	30.0907	30.2083
+	1.0348	2.80046	tr|F1PK66|F1PK66_CANLF;tr|E2RIN1|E2RIN1_CANLF;tr|E2RIN6|E2RIN6_CANLF	tr|F1PK66|F1PK66_CANLF			F1PK66				ECE1	5	14	5	5	9.9	9.9	9.9	85.462	0	27.579	1311900000	NaN	24.2558	27.3128	28.6727	28.6968	28.3849
+	1.69263	2.80352	tr|J9NSZ7|J9NSZ7_CANLF	tr|J9NSZ7|J9NSZ7_CANLF			J9NSZ7				MPZL1	2	8	2	2	8.3	8.3	8.3	35.915	0	45.863	886620000	24.1682	24.7952	26.596	28.2473	28.0991	27.6236
+	1.41778	2.80805	tr|J9P3V6|J9P3V6_CANLF;tr|F1PWJ7|F1PWJ7_CANLF	tr|J9P3V6|J9P3V6_CANLF;tr|F1PWJ7|F1PWJ7_CANLF			J9P3V6				BCAM	34	1241	34	34	70.4	70.4	70.4	67.747	0	323.31	328030000000	32.4616	33.1036	35.4773	36.6788	36.421	36.3669
+	1.68819	2.81485	tr|F1Q3A2|F1Q3A2_CANLF	tr|F1Q3A2|F1Q3A2_CANLF			F1Q3A2				TMPRSS11E	31	247	31	31	63	63	63	47.761	0	323.31	95597000000	31.0921	31.2699	33.4366	34.8893	34.6946	34.6592
+	1.38111	2.81952	tr|F1PGX2|F1PGX2_CANLF;tr|F1PGX1|F1PGX1_CANLF	tr|F1PGX2|F1PGX2_CANLF;tr|F1PGX1|F1PGX1_CANLF			F1PGX2				DSG2	68	809	68	68	63	63	63	122.36	0	323.31	214960000000	32.0244	32.1829	34.9469	36	35.9046	35.7082
+	2.45935	2.82699	tr|F1PSB1|F1PSB1_CANLF	tr|F1PSB1|F1PSB1_CANLF			F1PSB1				SEMA4D	22	92	22	22	26	26	26	107.91	0	304.39	13780000000	28.5489	28.9514	30.0104	32.2362	31.7595	31.9959
+	1.9848	2.83786	tr|J9P884|J9P884_CANLF;tr|F1PGL1|F1PGL1_CANLF	tr|J9P884|J9P884_CANLF;tr|F1PGL1|F1PGL1_CANLF			J9P884				VCAN	18	35	18	18	7.6	7.6	7.6	260.62	0	87.617	5831300000	26.8786	27.8309	29.0009	30.7712	30.9062	30.5465
+	1.48012	2.84048	tr|F1PVS7|F1PVS7_CANLF	tr|F1PVS7|F1PVS7_CANLF			F1PVS7				PVR	12	53	12	12	34.6	34.6	34.6	43.704	0	107.58	9452900000	27.4854	27.8418	30.3046	31.5084	31.3944	31.2505
+	1.20128	2.84674	tr|F1PYH4|F1PYH4_CANLF;tr|E2RRA0|E2RRA0_CANLF	tr|F1PYH4|F1PYH4_CANLF;tr|E2RRA0|E2RRA0_CANLF			F1PYH4				CLDND1	4	21	4	4	18.5	18.5	18.5	32.099	0	20.519	3315000000	NaN	25.7899	28.4136	30.0886	29.7863	29.9706
+	1.31681	2.8511	tr|E2R4F0|E2R4F0_CANLF;tr|J9P8K7|J9P8K7_CANLF	tr|E2R4F0|E2R4F0_CANLF			E2R4F0				CELSR2	24	58	25	24	12.5	12.1	12.1	317.63	0	134.57	5438400000	26.6643	26.7208	29.7239	30.7176	30.4684	30.4764
+	0.984265	2.86245	tr|F6XXM1|F6XXM1_CANLF	tr|F6XXM1|F6XXM1_CANLF			F6XXM1				FAT1	5	9	5	5	1.5	1.5	1.5	556.17	0	20.616	1149200000	23.8882	NaN	27.1688	28.5992	28.4662	28.1073
+	1.32607	2.90753	tr|E2QZT4|E2QZT4_CANLF	tr|E2QZT4|E2QZT4_CANLF			E2QZT4				BSG	20	285	20	20	58.2	58.2	58.2	29.302	0	323.31	207890000000	31.797	31.9829	34.9454	35.9182	35.9421	35.5876
+	2.1159	2.90779	tr|J9NY13|J9NY13_CANLF;tr|F1PRY2|F1PRY2_CANLF;tr|J9P084|J9P084_CANLF;tr|F1Q0Y0|F1Q0Y0_CANLF	tr|J9NY13|J9NY13_CANLF;tr|F1PRY2|F1PRY2_CANLF			J9NY13				ABCC3	36	126	38	38	33.9	33.9	32.8	168.86	0	317.71	16951000000	28.9349	28.7246	30.4872	32.588	32.3254	31.9567
+	1.63395	2.91274	tr|F1PU73|F1PU73_CANLF	tr|F1PU73|F1PU73_CANLF			F1PU73				NCSTN	3	10	3	3	3.8	3.8	3.8	77.986	0	7.7097	2311400000	25.8593	25.4838	28.0549	29.4963	29.5436	29.0962
+	1.70254	2.95409	tr|F1PP71|F1PP71_CANLF	tr|F1PP71|F1PP71_CANLF			F1PP71				F11R	17	193	17	17	51.2	51.2	51.2	32.694	0	323.31	125600000000	31.1762	31.6913	33.7408	35.2452	35.2068	35.0186
+	1.34454	2.95448	tr|F1P8Q0|F1P8Q0_CANLF	tr|F1P8Q0|F1P8Q0_CANLF			F1P8Q0				ITGAV	72	1125	72	72	65.4	65.4	65.4	112.53	0	323.31	375850000000	32.6435	32.7586	35.7751	36.8137	36.6495	36.5774
+	1.98899	2.99462	tr|F1PH98|F1PH98_CANLF;tr|F1PEK0|F1PEK0_CANLF;tr|F1PXQ4|F1PXQ4_CANLF;tr|F1PA88|F1PA88_CANLF;tr|E2RAY2|E2RAY2_CANLF	tr|F1PH98|F1PH98_CANLF			F1PH98				SLC7A5	6	22	6	6	12	12	12	55.812	0	44.346	13996000000	28.1651	28.6806	30.1782	32.3375	32.1673	31.503
+	1.39165	2.99621	tr|J9P9V8|J9P9V8_CANLF;tr|F1PLP3|F1PLP3_CANLF	tr|J9P9V8|J9P9V8_CANLF;tr|F1PLP3|F1PLP3_CANLF			J9P9V8				CD82	4	10	4	4	17.9	17.9	17.9	30.095	0	60.443	2548700000	NaN	25.4732	27.7261	29.762	29.755	29.2705
+	1.3536	3.01594	tr|F1Q129|F1Q129_CANLF;tr|J9P046|J9P046_CANLF	tr|F1Q129|F1Q129_CANLF;tr|J9P046|J9P046_CANLF			F1Q129				COL4A2	11	40	11	11	11.2	11.2	11.2	164.8	0	84.548	7899500000	27.8584	26.6074	29.4827	31.9886	31.1677	29.84
+	1.30131	3.02575	tr|F1PGD5|F1PGD5_CANLF	tr|F1PGD5|F1PGD5_CANLF			F1PGD5				CD302	41	166	41	41	25.7	25.7	25.7	198.29	0	323.31	29089000000	28.6818	29.0652	32.1221	32.971	33.0697	32.9056
+	0.958315	3.02988	tr|F1PQM7|F1PQM7_CANLF	tr|F1PQM7|F1PQM7_CANLF			F1PQM7				CD9	6	32	6	6	24.6	24.6	24.6	22.798	0	75.376	11257000000	NaN	26.8534	30.4462	31.6073	31.908	31.5236
+	1.26746	3.0353	tr|J9PA14|J9PA14_CANLF	tr|J9PA14|J9PA14_CANLF			J9PA14				CD99	3	31	3	3	21.3	21.3	21.3	16.047	0	228.39	10325000000	26.5805	28.3603	30.4666	31.5356	31.5391	31.4386
+	1.96081	3.05477	tr|F1PQ47|F1PQ47_CANLF	tr|F1PQ47|F1PQ47_CANLF			F1PQ47				SPINT1	25	113	25	25	49.3	49.3	49.3	56.377	0	323.31	21480000000	29.1296	28.7059	30.9253	32.7023	32.5908	32.6319
+	2.30164	3.06827	tr|F1P7K9|F1P7K9_CANLF;tr|E2R6B8|E2R6B8_CANLF;tr|F1PFW3|F1PFW3_CANLF	tr|F1P7K9|F1P7K9_CANLF;tr|E2R6B8|E2R6B8_CANLF;tr|F1PFW3|F1PFW3_CANLF			F1P7K9				CA14	5	25	5	5	23.8	23.8	23.8	37.472	0	18.589	3342300000	26.3614	26.5243	27.7229	30.2423	30.3132	29.258
+	1.49141	3.0734	tr|J9NRJ0|J9NRJ0_CANLF;tr|F1PHM5|F1PHM5_CANLF	tr|J9NRJ0|J9NRJ0_CANLF;tr|F1PHM5|F1PHM5_CANLF			J9NRJ0				HSPG2	19	388	116	116	38.5	38.5	6.6	467.85	0	323.31	79781000000	31.4581	30.1632	32.0055	35.454	34.5947	32.7982
+	1.63596	3.07965	tr|F1PRC5|F1PRC5_CANLF	tr|F1PRC5|F1PRC5_CANLF			F1PRC5				SLC3A2	27	259	27	27	49.5	49.5	49.5	58.545	0	323.31	87153000000	30.5805	30.8256	33.2463	34.8622	34.592	34.4371
+	1.41209	3.08619	tr|F1PXM2|F1PXM2_CANLF;tr|F1Q270|F1Q270_CANLF	tr|F1PXM2|F1PXM2_CANLF			F1PXM2				MMP14	18	62	19	19	32.6	32.6	31.4	65.852	0	140.61	9026600000	26.8008	27.7455	30.1763	31.5849	31.3607	31.0356
+	1.88666	3.09381	tr|E2RE80|E2RE80_CANLF;tr|E2RE81|E2RE81_CANLF	tr|E2RE80|E2RE80_CANLF;tr|E2RE81|E2RE81_CANLF			E2RE80				PTPRF	72	340	81	81	54.5	54.5	48.9	210.83	0	323.31	96583000000	31.6568	30.5138	33.0049	34.9747	34.8047	34.6775
+	1.68826	3.09628	tr|E2QXF0|E2QXF0_CANLF;tr|J9NX36|J9NX36_CANLF;tr|E2QXC4|E2QXC4_CANLF	tr|E2QXF0|E2QXF0_CANLF			E2QXF0				FOLR2	18	215	18	18	60	60	60	29.669	0	323.31	53690000000	29.9503	30.0875	32.4935	34.138	33.9089	33.7731
+	1.62716	3.09851	tr|F1PV63|F1PV63_CANLF	tr|F1PV63|F1PV63_CANLF			F1PV63				CDCP1	23	113	23	23	30.9	30.9	30.9	92.482	0	247.51	31619000000	29.3061	29.104	31.8058	33.2658	33.1632	33.0823
+	1.59479	3.09876	tr|F1PUP2|F1PUP2_CANLF;tr|F1PUN5|F1PUN5_CANLF;tr|F1PVZ9|F1PVZ9_CANLF;tr|F1PW00|F1PW00_CANLF	tr|F1PUP2|F1PUP2_CANLF;tr|F1PUN5|F1PUN5_CANLF			F1PUP2				PTPRM	48	226	51	51	41.9	41.9	39.5	161.39	0	323.31	56278000000	30.2651	29.7831	32.6546	34.0967	34.0564	33.846
+	1.79164	3.10933	tr|F1PPI5|F1PPI5_CANLF	tr|F1PPI5|F1PPI5_CANLF			F1PPI5				SLC1A5	4	14	4	4	11.7	11.7	11.7	57.507	0	16.289	2126700000	24.9307	26.1511	27.4124	29.6061	29.5462	28.6699
+	1.40609	3.11722	tr|E2REV2|E2REV2_CANLF	tr|E2REV2|E2REV2_CANLF			E2REV2				CDH16	25	300	25	25	51.7	51.7	51.7	90.032	0	323.31	103190000000	30.5332	30.867	33.771	34.9776	34.9	34.6453
+	1.02452	3.12927	tr|F1PB66|F1PB66_CANLF	tr|F1PB66|F1PB66_CANLF			F1PB66				CD81	3	18	3	3	17.2	17.2	17.2	25.254	0	219.06	3414100000	NaN	25.1276	28.5771	30.0129	30.1766	29.7553
+	0.905017	3.15613	tr|F1PEF0|F1PEF0_CANLF	tr|F1PEF0|F1PEF0_CANLF			F1PEF0				DSC3	12	35	14	12	17.8	15.3	15.3	97.607	0	49.738	3481300000	NaN	24.8372	28.8167	30.1756	29.7821	29.9916
+	1.62739	3.16099	tr|F1PH14|F1PH14_CANLF	tr|F1PH14|F1PH14_CANLF			F1PH14				TMEM2	19	42	19	19	17.2	17.2	17.2	153.98	0	125.7	4437000000	26.1404	26.4641	28.932	30.5497	30.2097	30.26
+	1.52092	3.20168	tr|F1PVS8|F1PVS8_CANLF;tr|F1PVU4|F1PVU4_CANLF	tr|F1PVS8|F1PVS8_CANLF;tr|F1PVU4|F1PVU4_CANLF			F1PVS8				ATP6V0A1	6	9	6	6	9.4	9.4	9.4	91.92	0	23.39	1019100000	24.055	24.0778	26.7508	28.6745	28.3945	27.4196
+	1.89406	3.20347	tr|F1PJ05|F1PJ05_CANLF	tr|F1PJ05|F1PJ05_CANLF			F1PJ05				CNNM4	18	116	21	21	31.6	31.6	27.5	86.577	0	222.13	17094000000	28.2018	28.5724	30.5598	32.5204	32.3976	32.0264
+	1.40935	3.20837	tr|F1PR26|F1PR26_CANLF;tr|J9NW82|J9NW82_CANLF	tr|F1PR26|F1PR26_CANLF;tr|J9NW82|J9NW82_CANLF			F1PR26				PTGFRN	60	556	60	60	57.4	57.4	57.4	97.134	0	323.31	466950000000	32.6064	32.9252	35.9233	37.1975	37.0022	36.8803
+	1.65755	3.2272	tr|F1PG66|F1PG66_CANLF	tr|F1PG66|F1PG66_CANLF			F1PG66				LAMC2	43	132	43	43	45.9	45.9	45.9	131.07	0	323.31	19562000000	29.4124	27.8874	30.1639	33.3273	32.4961	31.322
+	1.38792	3.23869	tr|E2RT60|E2RT60_CANLF	tr|E2RT60|E2RT60_CANLF			E2RT60				ITGB1	55	1293	55	55	49	49	49	88.123	0	323.31	410930000000	32.4311	32.5999	35.7726	36.9468	36.8406	36.7321
+	1.50164	3.27175	tr|F1PCD8|F1PCD8_CANLF	tr|F1PCD8|F1PCD8_CANLF			F1PCD8				LAMB1	60	227	60	60	42.3	42.3	42.3	181.93	0	323.31	27169000000	29.2463	28.2977	31.2068	33.6749	33.0316	31.8595
+	1.71203	3.27705	sp|Q75ZY9|MET_CANLF;tr|J9P743|J9P743_CANLF;tr|Z4YHE9|Z4YHE9_CANLF;tr|F1PEM3|F1PEM3_CANLF;tr|J9NY14|J9NY14_CANLF;tr|F1PR52|F1PR52_CANLF;tr|F6XRA9|F6XRA9_CANLF	sp|Q75ZY9|MET_CANLF;tr|J9P743|J9P743_CANLF;tr|Z4YHE9|Z4YHE9_CANLF			Q75ZY9				MET	49	235	50	50	46.3	46.3	45.7	154.64	0	323.31	36437000000	29.1325	29.3933	31.8372	33.584	33.3352	33.2749
+	3.30831	3.28884	tr|F6XBS0|F6XBS0_CANLF	tr|F6XBS0|F6XBS0_CANLF			F6XBS0				IFNGR1	5	9	5	5	11.6	11.6	11.6	53.144	0	21.023	841070000	NaN	24.6582	24.8706	27.9691	28.3312	27.8595
+	1.13238	3.30396	tr|E2QZY0|E2QZY0_CANLF	tr|E2QZY0|E2QZY0_CANLF			E2QZY0				NTN4	7	31	7	7	14.2	14.2	14.2	69.84	0	34.876	4026700000	NaN	25.3559	28.4924	30.7472	30.1469	29.7902
+	1.74049	3.32062	tr|F1Q2Z6|F1Q2Z6_CANLF	tr|F1Q2Z6|F1Q2Z6_CANLF			F1Q2Z6				AGRN	51	140	51	51	36.2	36.2	36.2	216.6	0	323.31	22844000000	28.5259	28.6746	30.845	33.3452	32.7719	31.8902
+	1.59207	3.32453	tr|F1PAA4|F1PAA4_CANLF;sp|F1PAA9|CADH1_CANLF	tr|F1PAA4|F1PAA4_CANLF;sp|F1PAA9|CADH1_CANLF			F1PAA4				CDH1	40	582	40	40	42.9	42.9	42.9	91.483	0	323.31	206810000000	31.4558	31.7745	34.4721	35.9772	35.8955	35.8033
+	2.03085	3.32519	tr|F1P9X6|F1P9X6_CANLF;tr|F1P9X5|F1P9X5_CANLF	tr|F1P9X6|F1P9X6_CANLF;tr|F1P9X5|F1P9X5_CANLF			F1P9X6				SEMA4B	28	116	28	28	34.9	34.9	34.9	92.366	0	173.46	27057000000	29.3381	28.6705	31.0204	33.209	32.8379	32.9577
+	1.41653	3.34721	tr|E2RMT2|E2RMT2_CANLF;tr|F1PHH3|F1PHH3_CANLF	tr|E2RMT2|E2RMT2_CANLF;tr|F1PHH3|F1PHH3_CANLF			E2RMT2				PTK7	44	305	44	44	51.5	51.5	51.5	118.42	0	323.31	108470000000	30.4474	30.5239	33.7817	35.043	34.8781	34.8735
+	1.8278	3.36681	tr|E2QXH3|E2QXH3_CANLF	tr|E2QXH3|E2QXH3_CANLF			E2QXH3				TINAGL1	14	36	14	14	52.2	52.2	52.2	52.315	0	174.95	4716600000	26.684	26.2799	27.7693	31.4034	30.4084	29.0218
+	1.96787	3.3729	tr|F1PFZ5|F1PFZ5_CANLF	tr|F1PFZ5|F1PFZ5_CANLF			F1PFZ5				MFGE8	11	53	11	11	30	30	30	47.824	0	94.907	7372500000	27.1699	26.8438	29.2182	30.9743	31.2813	31.095
+	1.47865	3.39936	tr|F1PFZ9|F1PFZ9_CANLF	tr|F1PFZ9|F1PFZ9_CANLF			F1PFZ9				ADAM17	28	103	28	28	30.6	30.6	30.6	92.736	0	281.42	22475000000	27.7054	28.847	31.2977	32.8192	32.7687	32.4604
+	1.24953	3.40247	tr|E2QZH1|E2QZH1_CANLF	tr|E2QZH1|E2QZH1_CANLF			E2QZH1				TSPAN14	5	21	5	5	22.6	22.6	22.6	30.631	0	26.404	3504800000	24.3605	26.5693	28.7741	29.9479	30.1613	29.8022
+	1.43636	3.4244	tr|F1PEF1|F1PEF1_CANLF	tr|F1PEF1|F1PEF1_CANLF			F1PEF1				DSC2	8	428	53	53	57.1	57.1	6.9	100.82	0	323.31	146140000000	30.8014	30.8819	34.1551	35.5555	35.2957	35.2604
+	1.69627	3.43132	tr|E2QUZ0|E2QUZ0_CANLF	tr|E2QUZ0|E2QUZ0_CANLF			E2QUZ0				RELL1	7	18	7	7	33.6	33.6	33.6	29.266	0	114.32	5107000000	25.475	27.4286	28.5571	30.9091	30.5459	30.2996
+	1.22151	3.46356	tr|F1P6D7|F1P6D7_CANLF;tr|J9P735|J9P735_CANLF	tr|F1P6D7|F1P6D7_CANLF;tr|J9P735|J9P735_CANLF			F1P6D7				CD47	7	23	7	7	18.4	18.4	18.4	35.069	0	52.619	4282600000	25.4211	NaN	28.2667	30.6315	30.7611	29.5299
+	1.81577	3.46965	tr|F1PF63|F1PF63_CANLF;tr|J9P9X5|J9P9X5_CANLF	tr|F1PF63|F1PF63_CANLF;tr|J9P9X5|J9P9X5_CANLF			F1PF63				ST14	18	94	18	18	24.1	24.1	24.1	92.141	0	220.25	21572000000	27.9461	28.842	30.8111	32.8729	32.6473	32.488
+	1.47759	3.47008	tr|F1PVX2|F1PVX2_CANLF	tr|F1PVX2|F1PVX2_CANLF			F1PVX2				DCBLD2	17	73	17	17	34.5	34.5	34.5	80.441	0	184.86	12174000000	27.1872	27.2941	30.4973	31.8803	31.8648	31.6437
+	1.34787	3.47314	tr|F1P992|F1P992_CANLF;tr|J9P8H0|J9P8H0_CANLF	tr|F1P992|F1P992_CANLF;tr|J9P8H0|J9P8H0_CANLF			F1P992				CXADR	32	213	32	32	69.3	69.3	69.3	39.487	0	323.31	74170000000	29.3114	30.154	33.2497	34.6187	34.3602	34.1556
+	1.33652	3.48102	tr|F1P9S5|F1P9S5_CANLF;tr|J9NRH0|J9NRH0_CANLF	tr|F1P9S5|F1P9S5_CANLF			F1P9S5				PLXNB2	86	865	86	86	57	57	57	205.04	0	323.31	294450000000	31.5086	31.8294	35.3071	36.5108	36.3007	36.2766
+	0.969209	3.49204	tr|F1P8R0|F1P8R0_CANLF	tr|F1P8R0|F1P8R0_CANLF			F1P8R0				STEAP3	9	29	9	9	19.3	19.3	19.3	57.772	0	165.88	3353100000	24.4389	NaN	28.4905	30.3716	29.6782	29.8205
+	1.7352	3.49281	tr|F1PMP0|F1PMP0_CANLF	tr|F1PMP0|F1PMP0_CANLF			F1PMP0				TSPAN6	4	16	4	4	14.5	14.5	14.5	31.449	0	71.208	2397300000	24.3997	26.0971	27.5352	29.5477	29.592	29.3707
+	0.981097	3.50813	tr|F1Q133|F1Q133_CANLF;tr|F1Q0F7|F1Q0F7_CANLF;tr|J9P9L4|J9P9L4_CANLF;sp|Q28247|CO4A5_CANLF;tr|F1PH05|F1PH05_CANLF	tr|F1Q133|F1Q133_CANLF			F1Q133				COL4A1	5	19	5	5	5.6	5.6	5.6	156.2	0	168.12	4461900000	26.9163	23.8003	29.0355	31.1546	30.3641	28.7577
+	1.52327	3.54965	tr|F1PP33|F1PP33_CANLF;tr|J9NUT8|J9NUT8_CANLF	tr|F1PP33|F1PP33_CANLF;tr|J9NUT8|J9NUT8_CANLF			F1PP33				ITGA1	41	197	41	41	33.2	33.2	33.2	130.51	0	323.31	68851000000	29.3699	30.042	32.8707	34.3741	34.4187	34.1387
+	1.3361	3.56837	tr|F1PDP5|F1PDP5_CANLF	tr|F1PDP5|F1PDP5_CANLF			F1PDP5				CD276	7	20	7	7	22.1	22.1	22.1	57.05	0	26.855	10237000000	26.2432	27.247	30.3742	31.5416	31.7173	31.3107
+	1.67981	3.56985	tr|F1PBA0|F1PBA0_CANLF	tr|F1PBA0|F1PBA0_CANLF			F1PBA0				CD58	4	71	4	4	21.5	21.5	21.5	21.447	0	15.912	10331000000	27.5311	26.6963	29.8101	31.8587	31.8227	31.0656
+	1.3983	3.59566	tr|F1PGL5|F1PGL5_CANLF	tr|F1PGL5|F1PGL5_CANLF			F1PGL5				CPM	14	91	14	14	41.8	41.8	41.8	41.429	0	119.03	23341000000	27.54	28.4051	31.4316	33.0715	32.7556	32.3367
+	1.46321	3.60572	tr|F1PKT2|F1PKT2_CANLF	tr|F1PKT2|F1PKT2_CANLF			F1PKT2				LSR	25	185	25	25	51.3	51.3	51.3	66.213	0	323.31	68753000000	29.4971	29.6209	32.9492	34.5603	34.3509	33.9731
+	0.943283	3.61934	tr|F1PF03|F1PF03_CANLF	tr|F1PF03|F1PF03_CANLF			F1PF03				EGFR	26	76	27	26	28.1	27.1	27.1	131.53	0	205.52	15947000000	NaN	26.4056	30.7943	32.2748	32.2547	32.1284
+	1.30909	3.63282	tr|F1PRQ8|F1PRQ8_CANLF;tr|F1PXV3|F1PXV3_CANLF;tr|F1PXW8|F1PXW8_CANLF;tr|F1PAD6|F1PAD6_CANLF	tr|F1PRQ8|F1PRQ8_CANLF			F1PRQ8				EPHB4	27	92	30	30	40	40	36.5	108.5	0	272.64	19847000000	27.0036	28.1876	31.3553	32.5803	32.4236	32.441
+	2.42243	3.63473	tr|J9NZU1|J9NZU1_CANLF;tr|F1PQ46|F1PQ46_CANLF	tr|J9NZU1|J9NZU1_CANLF;tr|F1PQ46|F1PQ46_CANLF			J9NZU1				ANO6	24	120	24	24	26.2	26.2	26.2	106.18	0	240.71	25466000000	28.7052	28.75	30.4985	33.1641	32.9226	32.7711
+	1.82205	3.64494	tr|F1Q0S2|F1Q0S2_CANLF;sp|P33704|ATP4B_CANLF;tr|F1Q0V9|F1Q0V9_CANLF	tr|F1Q0S2|F1Q0S2_CANLF			F1Q0S2				ATP1B3	13	114	13	13	60.1	60.1	60.1	24.95	0	162.59	48870000000	29.0325	29.6705	31.9319	34.0928	33.9059	33.5711
+	1.47583	3.66422	tr|E2R949|E2R949_CANLF	tr|E2R949|E2R949_CANLF			E2R949				SLC44A1	21	101	21	21	26	26	26	73.204	0	235.68	27691000000	28.464	27.9334	31.5871	33.2839	32.9648	32.7285
+	4.43869	3.67659	tr|E2R003|E2R003_CANLF	tr|E2R003|E2R003_CANLF			E2R003				CRIM1	18	56	18	18	20.5	20.5	20.5	114	0	122.64	7227100000	NaN	27.4582	27.5626	31.2747	31.0576	31.2287
+	1.48097	3.67756	tr|F1PCQ3|F1PCQ3_CANLF	tr|F1PCQ3|F1PCQ3_CANLF			F1PCQ3				SLC16A1	21	99	21	21	33.9	33.9	33.9	53.747	0	323.31	40679000000	28.412	29.0847	32.1085	33.7616	33.686	33.1903
+	1.40563	3.68983	tr|J9P4E7|J9P4E7_CANLF;tr|E2RPA8|E2RPA8_CANLF	tr|J9P4E7|J9P4E7_CANLF;tr|E2RPA8|E2RPA8_CANLF			J9P4E7				CD151	5	24	5	5	18.7	18.7	18.7	29.236	0	37.336	17100000000	27.354	27.408	30.9896	32.5756	32.4039	31.8415
+	1.49961	3.69235	tr|E2R560|E2R560_CANLF	tr|E2R560|E2R560_CANLF			E2R560				HYAL2	5	16	5	5	8.8	8.8	8.8	53.888	0	29.334	1334100000	23.7323	23.8674	27.1847	28.8069	28.7384	28.3163
+	0.921589	3.71317	tr|F1PID1|F1PID1_CANLF	tr|F1PID1|F1PID1_CANLF			F1PID1				SLC9A1	13	77	13	13	20.5	20.5	20.5	90.968	0	209.66	12963000000	NaN	25.9084	30.4931	32.2218	31.8109	31.709
+	1.58873	3.7226	sp|Q9TSX8|VNN1_CANLF;tr|F1PDF3|F1PDF3_CANLF	sp|Q9TSX8|VNN1_CANLF			Q9TSX8				VNN1	2	88	16	16	31.3	31.3	4.9	57.431	0	207.7	19225000000	27.371	28.0613	30.8749	32.6714	32.3945	32.4091
+	1.47705	3.73336	tr|F1PDQ0|F1PDQ0_CANLF	tr|F1PDQ0|F1PDQ0_CANLF			F1PDQ0				NPTN	8	60	8	8	25.2	25.2	25.2	40.952	0	70.196	11375000000	27.579	26.2331	30.0494	32.1536	31.9116	30.9964
+	1.31149	3.74207	tr|E2QXI6|E2QXI6_CANLF	tr|E2QXI6|E2QXI6_CANLF			E2QXI6				TPBG	13	146	13	13	36	36	36	45.695	0	290.49	26545000000	27.6879	27.9637	31.8215	33.0197	32.9205	32.759
+	2.54317	3.77208	tr|F1PIB4|F1PIB4_CANLF	tr|F1PIB4|F1PIB4_CANLF			F1PIB4				LRP2	21	39	21	21	5.2	5.2	5.2	510.1	0	57.948	2884200000	25.9527	25.1385	27.0609	30.0136	29.9435	29.5112
+	1.16251	3.78698	tr|F1Q0H9|F1Q0H9_CANLF	tr|F1Q0H9|F1Q0H9_CANLF			F1Q0H9				SLC1A4	8	31	8	8	22.5	22.5	22.5	55.535	0	134.35	3659200000	24.55	NaN	28.1547	30.2337	30.3687	29.8155
+	1.70354	3.80362	tr|E2QSB5|E2QSB5_CANLF	tr|E2QSB5|E2QSB5_CANLF			E2QSB5				EFNB1	12	51	12	12	43.2	43.2	43.2	34.699	0	200.83	13237000000	27.0355	27.2903	30.1809	32.1238	31.9427	31.851
+	1.35885	3.8038	tr|F1PXU6|F1PXU6_CANLF;tr|J9NY09|J9NY09_CANLF;tr|E2RPM8|E2RPM8_CANLF;tr|E2R795|E2R795_CANLF	tr|F1PXU6|F1PXU6_CANLF			F1PXU6				IGF1R	62	347	62	62	42.9	42.9	42.9	154.89	0	323.31	118920000000	29.6578	30.3141	33.8613	35.2312	35.0563	34.9571
+	1.09883	3.88161	tr|F1P983|F1P983_CANLF;tr|J9NUR9|J9NUR9_CANLF	tr|F1P983|F1P983_CANLF;tr|J9NUR9|J9NUR9_CANLF			F1P983				PTPRJ	13	30	13	13	12	12	12	135.85	0	85.637	4730800000	23.8684	25.9978	29.5507	30.2375	30.2522	30.5721
+	1.44112	3.88459	tr|F1Q4C5|F1Q4C5_CANLF;tr|F1PX14|F1PX14_CANLF;tr|F1PRX7|F1PRX7_CANLF;tr|F1PRX3|F1PRX3_CANLF;tr|F1P925|F1P925_CANLF	tr|F1Q4C5|F1Q4C5_CANLF;tr|F1PX14|F1PX14_CANLF			F1Q4C5				EPHA2	23	77	25	23	31.3	29.3	29.3	108.26	0	218.19	13172000000	26.8794	26.7079	30.5453	32.0085	31.9687	31.8092
+	1.09478	3.95744	tr|E2RRN8|E2RRN8_CANLF	tr|E2RRN8|E2RRN8_CANLF			E2RRN8				VASN	10	45	10	10	22.2	22.2	22.2	71.469	0	94.474	4299300000	NaN	24.3821	28.457	30.5036	30.4013	30.2261
+	1.50779	3.99004	tr|F1PM26|F1PM26_CANLF	tr|F1PM26|F1PM26_CANLF			F1PM26				CD109	17	52	17	17	16.2	16.2	16.2	162.23	0	137.04	3414300000	26.043	23.9132	28.1508	30.0536	30.0593	29.9643
+	1.78091	3.99843	tr|E2RPP1|E2RPP1_CANLF	tr|E2RPP1|E2RPP1_CANLF			E2RPP1				LAMA3	65	124	67	67	24.1	24.1	23.4	367.68	0	323.31	15124000000	27.3269	27.34	29.0206	33.1296	32.2524	30.3008
+	2.11915	4.00604	tr|F1PGJ7|F1PGJ7_CANLF;tr|J9P5N9|J9P5N9_CANLF	tr|F1PGJ7|F1PGJ7_CANLF;tr|J9P5N9|J9P5N9_CANLF			F1PGJ7				DDR1	15	42	15	15	18.3	18.3	18.3	101.82	0	69.608	4530800000	26.0369	25.3486	28.0192	30.6294	30.4308	30.3626
+	1.52473	4.01427	tr|F1P6Z9|F1P6Z9_CANLF;tr|F1P7M7|F1P7M7_CANLF;tr|F1P702|F1P702_CANLF	tr|F1P6Z9|F1P6Z9_CANLF;tr|F1P7M7|F1P7M7_CANLF;tr|F1P702|F1P702_CANLF			F1P6Z9				CADM1	19	226	19	19	48.8	48.8	48.8	44.494	0	323.31	126750000000	29.7333	30.2705	33.6105	35.3774	35.1823	35.0975
+	1.25273	4.03459	tr|F1Q4K7|F1Q4K7_CANLF	tr|F1Q4K7|F1Q4K7_CANLF			F1Q4K7				SLITRK4	23	144	23	23	32.2	32.2	32.2	94.503	0	319.83	17619000000	26.9845	26.5487	31.2811	32.4376	32.2936	32.1869
+	0.889303	4.03906	tr|F1PLY1|F1PLY1_CANLF;tr|J9P5A2|J9P5A2_CANLF	tr|F1PLY1|F1PLY1_CANLF;tr|J9P5A2|J9P5A2_CANLF			F1PLY1				CELSR1	26	59	27	27	13.2	13.2	12.8	298.58	0	132.37	7875600000	NaN	24.5631	29.7611	31.3869	31.0171	31.1995
+	1.7416	4.05742	tr|F1PHK9|F1PHK9_CANLF	tr|F1PHK9|F1PHK9_CANLF			F1PHK9				LAMC1	56	203	56	56	44.2	44.2	44.2	164.63	0	323.31	28891000000	28.4255	27.693	30.7873	33.7978	33.1412	32.139
+	1.61081	4.07448	tr|J9P4N4|J9P4N4_CANLF	tr|J9P4N4|J9P4N4_CANLF			J9P4N4				CD59	3	10	3	3	11.5	11.5	11.5	15.628	0	15.294	1764200000	23.7921	NaN	26.3404	29.2784	29.2946	28.8492
+	1.34608	4.09838	tr|F1PIQ9|F1PIQ9_CANLF;sp|O18735|ERBB2_CANLF;tr|F1PAC5|F1PAC5_CANLF;tr|J9P025|J9P025_CANLF;tr|E2R7P5|E2R7P5_CANLF;tr|J9P9H9|J9P9H9_CANLF	tr|F1PIQ9|F1PIQ9_CANLF;sp|O18735|ERBB2_CANLF			F1PIQ9				ERBB2	41	397	43	43	45	45	43.4	138.18	0	323.31	115950000000	29.1493	29.9677	33.762	35.2241	35.0294	34.9208
+	1.15115	4.09986	tr|F1P9V1|F1P9V1_CANLF;sp|Q8WMU5|FZD6_CANLF	tr|F1P9V1|F1P9V1_CANLF;sp|Q8WMU5|FZD6_CANLF			F1P9V1				FZD6	15	48	15	15	18.7	18.7	18.7	80.252	0	61.934	9910100000	24.7176	26.9157	30.4632	31.4269	31.5842	31.3849
+	1.11801	4.10918	tr|F1P6G0|F1P6G0_CANLF;tr|E2R0M2|E2R0M2_CANLF	tr|F1P6G0|F1P6G0_CANLF			F1P6G0				PLXNA1	23	49	30	24	18.8	15.9	15.2	211.66	0	153.67	4978100000	NaN	24.4262	28.5477	30.8331	30.4686	30.4866
+	1.09166	4.10961	tr|F1PFD6|F1PFD6_CANLF;tr|J9NRQ0|J9NRQ0_CANLF;tr|F1P9A6|F1P9A6_CANLF	tr|F1PFD6|F1PFD6_CANLF			F1PFD6				TENM4	26	51	27	27	11.2	11.2	10.9	307.73	0	78.287	7649700000	24.9819	NaN	29.2307	31.3512	31.156	31.1404
+	2.73368	4.1158	tr|F1PJN2|F1PJN2_CANLF;tr|F1PNT0|F1PNT0_CANLF	tr|F1PJN2|F1PJN2_CANLF;tr|F1PNT0|F1PNT0_CANLF			F1PJN2				LSAMP	13	53	13	13	50.2	50.2	50.2	31.656	0	134.43	20381000000	28.0592	27.9358	29.6635	32.7668	32.7213	32.5177
+	1.62223	4.12688	sp|Q9TSZ6|DAG1_CANLF	sp|Q9TSZ6|DAG1_CANLF			Q9TSZ6				DAG1	17	103	17	17	20.9	20.9	20.9	97.191	0	146.31	21976000000	27.122	27.7513	30.882	32.7333	32.7732	32.6294
+	0.951691	4.12765	tr|E2R4Q1|E2R4Q1_CANLF;tr|J9P315|J9P315_CANLF	tr|E2R4Q1|E2R4Q1_CANLF;tr|J9P315|J9P315_CANLF			E2R4Q1				LRP1	28	38	28	28	7.5	7.5	7.5	502.76	0	100.79	4414200000	NaN	23.7874	28.7419	30.5451	30.337	30.2949
+	1.44094	4.18773	tr|J9NZ79|J9NZ79_CANLF	tr|J9NZ79|J9NZ79_CANLF			J9NZ79				SDC4	10	63	10	10	39.6	39.6	39.6	21.94	0	292.83	32181000000	27.0998	28.4153	31.6428	33.2649	33.3307	33.1255
+	0.892978	4.19307	tr|F1PVC5|F1PVC5_CANLF	tr|F1PVC5|F1PVC5_CANLF			F1PVC5				ERBB3	19	85	19	19	28.3	28.3	28.3	113.26	0	162.48	8599400000	NaN	24.4566	29.8339	31.4102	31.4506	31.1541
+	1.37308	4.2471	tr|E2RKY7|E2RKY7_CANLF;tr|E2RPZ1|E2RPZ1_CANLF	tr|E2RKY7|E2RKY7_CANLF			E2RKY7				FLRT3	21	92	21	21	40.4	40.4	40.4	73.141	0	183.93	15838000000	26.3959	26.6203	30.8342	32.2705	32.2073	32.1139
+	1.24982	4.27852	tr|E2RL88|E2RL88_CANLF;tr|J9NVU0|J9NVU0_CANLF	tr|E2RL88|E2RL88_CANLF;tr|J9NVU0|J9NVU0_CANLF			E2RL88				ITGA6	42	145	42	42	41	41	41	122.04	0	323.31	29756000000	26.5159	27.9975	31.9017	33.1786	33.0632	33.0087
+	1.26488	4.34327	tr|F1Q439|F1Q439_CANLF	tr|F1Q439|F1Q439_CANLF			F1Q439				ITGA3	23	219	23	23	28.9	28.9	28.9	116.73	0	323.31	47884000000	27.698	27.9321	32.6283	33.9565	33.8201	33.5116
+	1.92585	4.41861	tr|F1PNA2|F1PNA2_CANLF	tr|F1PNA2|F1PNA2_CANLF			F1PNA2				ABCC4	21	56	22	21	20.4	19.8	19.8	149.61	0	145.07	3223800000	23.7558	25.8013	27.1445	30.3349	30.0301	29.5926
+	1.0684	4.43478	tr|F1PWC1|F1PWC1_CANLF;tr|E2REV6|E2REV6_CANLF	tr|F1PWC1|F1PWC1_CANLF;tr|E2REV6|E2REV6_CANLF			F1PWC1				PTPRG	21	61	21	21	23.1	23.1	23.1	154.7	0	212.51	6237000000	24.1569	NaN	28.8151	31.2314	30.9486	30.5824
+	1.50606	4.44507	sp|P33729|ICAM1_CANLF;tr|F1PB95|F1PB95_CANLF	sp|P33729|ICAM1_CANLF;tr|F1PB95|F1PB95_CANLF			P33729				ICAM1	14	79	14	14	27.3	27.3	27.3	57.951	0	126.26	24677000000	26.9497	27.1869	31.1528	33.0137	32.7956	32.8154
+	0.934527	4.49076	tr|E2RB35|E2RB35_CANLF	tr|E2RB35|E2RB35_CANLF			E2RB35				FLRT2	18	70	18	18	38.2	38.2	38.2	73.834	0	196.49	9593700000	NaN	24.2769	29.7614	31.5964	31.2559	31.6774
+	1.25297	4.50105	tr|E2R6A6|E2R6A6_CANLF	tr|E2R6A6|E2R6A6_CANLF			E2R6A6				EPHA1	23	111	23	23	31.4	31.4	31.4	107.48	0	238.06	21090000000	25.5884	27.4122	31.3029	32.7194	32.5252	32.5621
+	0.998296	4.58224	tr|E2R5J7|E2R5J7_CANLF;tr|F1PGU5|F1PGU5_CANLF	tr|E2R5J7|E2R5J7_CANLF			E2R5J7				PTPRA	16	45	16	16	24.7	24.7	24.7	89.62	0	121.57	6637500000	NaN	23.8199	29.026	31.2403	31.0665	30.7087
+	1.49216	4.5892	tr|E2QX93|E2QX93_CANLF	tr|E2QX93|E2QX93_CANLF			E2QX93				PCDH1	30	118	30	30	29.5	29.5	29.5	132.95	0	323.31	22710000000	25.9436	27.7754	30.8238	32.8142	32.6787	32.8174
+	1.34287	4.89299	tr|E2RM56|E2RM56_CANLF	tr|E2RM56|E2RM56_CANLF			E2RM56				PLXNB1	45	186	46	46	28.7	28.7	28.3	232.9	0	323.31	40030000000	26.0063	28.1991	31.8281	33.7839	33.6445	33.2842
+	1.45467	4.99653	tr|F1PPD8|F1PPD8_CANLF;tr|F1Q2E3|F1Q2E3_CANLF;tr|F1PPH0|F1PPH0_CANLF;tr|E2R186|E2R186_CANLF	tr|F1PPD8|F1PPD8_CANLF;tr|F1Q2E3|F1Q2E3_CANLF;tr|F1PPH0|F1PPH0_CANLF			F1PPD8				FGFR2	14	41	17	17	22.5	22.5	18.9	92.094	0	80.536	7048100000	24.6359	24.3482	29.2687	31.16	31.0882	30.9941
+	1.55531	5.04481	tr|J9P423|J9P423_CANLF;tr|F1PTZ7|F1PTZ7_CANLF;sp|Q28284|CD44_CANLF	tr|J9P423|J9P423_CANLF;tr|F1PTZ7|F1PTZ7_CANLF;sp|Q28284|CD44_CANLF			J9P423				CD44	12	88	12	12	35.5	35.5	35.5	39.52	0	188.84	37152000000	27.5974	26.4188	31.36	33.6813	33.5022	33.3271
+	1.53676	5.04781	tr|E2QSC8|E2QSC8_CANLF	tr|E2QSC8|E2QSC8_CANLF			E2QSC8				TSPAN8	9	41	9	9	38.8	38.8	38.8	25.802	0	323.31	38137000000	26.8447	27.1028	31.5064	33.6016	33.6301	33.3655
+	1.40391	5.10186	tr|F1PH17|F1PH17_CANLF	tr|F1PH17|F1PH17_CANLF			F1PH17				PTPRD	24	71	38	29	29.6	24	20.5	211.76	0	211.63	8997100000	24.1879	25.1251	29.6604	31.6485	31.3547	31.2758
+	2.35905	5.10497	tr|F6XRM5|F6XRM5_CANLF	tr|F6XRM5|F6XRM5_CANLF			F6XRM5				ENPEP	14	36	14	14	16.4	16.4	16.4	109.2	0	92.021	4238400000	24.4675	24.442	27.0313	30.6235	30.5876	30.0447
+	1.31323	5.31952	tr|F1PM35|F1PM35_CANLF;tr|J9P3V3|J9P3V3_CANLF	tr|F1PM35|F1PM35_CANLF			F1PM35				GPC4	20	97	20	20	46	46	46	62.432	0	315.33	17282000000	25.1291	25.1389	30.8135	32.5443	32.3744	32.1214
+	1.60016	5.37897	tr|J9P7Y2|J9P7Y2_CANLF;tr|F1P7C5|F1P7C5_CANLF	tr|J9P7Y2|J9P7Y2_CANLF;tr|F1P7C5|F1P7C5_CANLF			J9P7Y2				ACE2	21	107	21	21	32.2	32.2	32.2	92.845	0	323.31	23189000000	26.1877	25.666	30.5246	32.9438	32.8215	32.7499
+	2.14588	5.66973	tr|F6V690|F6V690_CANLF;tr|J9PB59|J9PB59_CANLF	tr|F6V690|F6V690_CANLF;tr|J9PB59|J9PB59_CANLF			F6V690				HLA-DRB1	2	12	9	2	30.3	6.2	6.2	31.171	0	6.6371	47817000000	29.3906	29.4075	26.0463	34.0154	33.8392	33.9989
+	1.45657	5.80217	tr|F1PTU4|F1PTU4_CANLF	tr|F1PTU4|F1PTU4_CANLF			F1PTU4				PCCB	28	270	28	28	60.8	60.8	60.8	59.976	0	323.31	116630000000	26.7019	28.4481	32.8456	35.4553	35.3778	34.5691
	1.0228	-0.794008	sp|E2RQ15|RAB25_CANLF	sp|E2RQ15|RAB25_CANLF			E2RQ15				RAB25	6	17	7	6	35.2	31.5	31.5	23.619	0	18.124	1136400000	27.5618	28.3958	28.2333	27.5215	27.5379	26.7494
	0.349726	0.396001	sp|F1PTE3|RAB13_CANLF	sp|F1PTE3|RAB13_CANLF			F1PTE3				RAB13	3	11	6	3	28.6	15.8	15.8	22.667	0	35.902	1309700000	27.529	28.2358	27.13	27.6496	27.7245	28.7087
	0.254953	0.207305	sp|O46550|CAV2_CANLF;tr|F1PFX6|F1PFX6_CANLF	sp|O46550|CAV2_CANLF;tr|F1PFX6|F1PFX6_CANLF			O46550				CAV2 CAV-2	2	14	2	2	23.5	23.5	23.5	17.931	0	61.337	2347200000	28.947	28.03	28.9649	29.0061	28.8785	28.6792
	0.438681	-0.262707	sp|P18066|RAB5A_CANLF	sp|P18066|RAB5A_CANLF			P18066				RAB5A	3	9	7	3	36.7	18.6	18.6	23.658	0	13.47	1740200000	28.6979	28.1195	28.6267	27.9956	28.5774	28.083
	0.718627	-0.854005	sp|P24408|RAB9A_CANLF;tr|E2RBU0|E2RBU0_CANLF	sp|P24408|RAB9A_CANLF			P24408				RAB9A RAB9	4	8	4	4	24.9	24.9	24.9	22.81	0	16.081	699070000	27.8254	27.9421	26.5268	26.8152	26.9342	25.9828
	0.971612	0.32331	tr|J9NXA9|J9NXA9_CANLF;sp|P38377|S61A1_CANLF;tr|F1PNM2|F1PNM2_CANLF;tr|F1PC79|F1PC79_CANLF	tr|J9NXA9|J9NXA9_CANLF;sp|P38377|S61A1_CANLF;tr|F1PNM2|F1PNM2_CANLF;tr|F1PC79|F1PC79_CANLF			J9NXA9				SEC61A1	9	44	9	9	19.5	19.5	19.5	51.867	0	71.305	14109000000	31.21	31.305	31.0633	31.709	31.5932	31.2459
	0.724774	-0.826918	sp|P49256|LMAN2_CANLF;tr|J9P396|J9P396_CANLF	sp|P49256|LMAN2_CANLF;tr|J9P396|J9P396_CANLF			P49256				LMAN2	6	19	6	6	15.2	15.2	15.2	40.213	0	23.559	3338500000	30.3429	30.062	28.6852	29.0451	28.8708	28.6934
	0.481381	-0.339396	sp|P50551|VASP_CANLF;tr|F1PRR4|F1PRR4_CANLF;tr|J9P328|J9P328_CANLF;tr|F1PB84|F1PB84_CANLF	sp|P50551|VASP_CANLF;tr|F1PRR4|F1PRR4_CANLF			P50551				VASP	13	62	13	13	42.7	42.7	42.7	40.413	0	84.814	7846600000	31.0871	30.912	30.1664	30.1663	30.4037	30.5772
	1.27887	-0.335358	tr|F1PSG5|F1PSG5_CANLF;sp|P54832|PON2_CANLF	tr|F1PSG5|F1PSG5_CANLF;sp|P54832|PON2_CANLF			F1PSG5				PON2	7	37	7	7	32.2	32.2	32.2	39.345	0	107.69	6362900000	30.2701	30.5692	30.3573	30.1346	29.8941	30.1618
	0.616058	-0.523023	sp|P60952|CDC42_CANLF;tr|J9P730|J9P730_CANLF;tr|J9NYK5|J9NYK5_CANLF;tr|J9NZN5|J9NZN5_CANLF	sp|P60952|CDC42_CANLF;tr|J9P730|J9P730_CANLF			P60952				CDC42	7	91	8	7	44	38.2	38.2	21.258	0	73.2	8088600000	31.1638	30.5758	30.6961	29.7002	30.3008	30.8656
	0.417902	0.286167	sp|P61007|RAB8A_CANLF;tr|J9NWR1|J9NWR1_CANLF;tr|E2QSW2|E2QSW2_CANLF;tr|E2RC93|E2RC93_CANLF;tr|F1PDF8|F1PDF8_CANLF;tr|J9NTY1|J9NTY1_CANLF	sp|P61007|RAB8A_CANLF;tr|J9NWR1|J9NWR1_CANLF			P61007				RAB8A MEL RAB8	6	39	12	9	47.3	35.7	27.5	23.668	0	50.517	8981300000	30.8993	30.7907	30.0218	30.742	31.0423	30.786
	0.307397	-0.353102	tr|F1PX23|F1PX23_CANLF;sp|Q01685|TRAM1_CANLF	tr|F1PX23|F1PX23_CANLF;sp|Q01685|TRAM1_CANLF			F1PX23				TRAM1	3	10	3	3	8.5	8.5	8.5	40.767	0	20.877	1682000000	29.3264	28.13	28.034	28.2217	28.4717	27.7378
	0.131577	-0.205173	sp|Q28895|NPC2_CANLF;tr|F1PAR9|F1PAR9_CANLF	sp|Q28895|NPC2_CANLF;tr|F1PAR9|F1PAR9_CANLF			Q28895				NPC2	3	6	3	3	30.9	30.9	30.9	16.056	0	9.2328	632150000	25.8275	27.2246	27.4584	26.1065	26.8462	26.9422
	0.100442	-0.0937678	sp|Q28923|YES_CANLF;tr|F1PSB7|F1PSB7_CANLF;tr|E2RC06|E2RC06_CANLF;tr|E2RC09|E2RC09_CANLF	sp|Q28923|YES_CANLF;tr|F1PSB7|F1PSB7_CANLF			Q28923				YES1 YES	5	14	11	5	20	9.3	9.3	60.299	0	13.245	2582100000	29.0051	28.5138	29.2854	28.9555	29.2016	28.366
	0.559864	0.546776	sp|Q4LAL9|CATD_CANLF	sp|Q4LAL9|CATD_CANLF			Q4LAL9				CTSD	13	116	13	13	36.6	36.6	36.6	44.32	0	96.659	21701000000	31.3369	31.6526	31.6658	31.6341	31.7252	32.9363
	0.63316	-0.805217	tr|F1PHD2|F1PHD2_CANLF;sp|Q6RH31|PSN1_CANLF;tr|F1PWY2|F1PWY2_CANLF	tr|F1PHD2|F1PHD2_CANLF;sp|Q6RH31|PSN1_CANLF;tr|F1PWY2|F1PWY2_CANLF			F1PHD2				PSEN1	2	7	2	2	6	6	6	52.45	0	10.332	542150000	26.5286	27.5026	26.837	26.4779	25.1765	26.7981
	0.363683	0.176553	sp|Q6TEQ7|ANXA2_CANLF;tr|E2RKW9|E2RKW9_CANLF;tr|J9PAF9|J9PAF9_CANLF;tr|J9P1X3|J9P1X3_CANLF	sp|Q6TEQ7|ANXA2_CANLF			Q6TEQ7				ANXA2 ANX2	29	197	29	29	66.1	66.1	66.1	38.654	0	323.31	46260000000	32.8739	33.2683	32.783	32.9127	33.1533	33.3888
	0	3.29473	tr|F1P9H1|F1P9H1_CANLF;tr|F1PRX6|F1PRX6_CANLF;sp|Q6UR05|MRP1_CANLF	tr|F1P9H1|F1P9H1_CANLF;tr|F1PRX6|F1PRX6_CANLF;sp|Q6UR05|MRP1_CANLF			F1P9H1				ABCC1	8	10	10	8	7.6	6.5	6.5	170.44	0	18.499	684830000	NaN	NaN	24.4365	28.416	27.738	27.0396
	0.00301076	-0.00477664	sp|Q6YKA4|HMGB1_CANLF;tr|J9P699|J9P699_CANLF;tr|E2QY30|E2QY30_CANLF	sp|Q6YKA4|HMGB1_CANLF;tr|J9P699|J9P699_CANLF			Q6YKA4				HMGB1	5	7	5	5	26.5	26.5	26.5	24.893	0	14.85	1127900000	27.8716	27.8913	27.2148	27.7746	26.7897	28.3991
	0	1.09125	tr|G1K297|G1K297_CANLF;sp|Q7YRL5|TNR5_CANLF	tr|G1K297|G1K297_CANLF;sp|Q7YRL5|TNR5_CANLF			G1K297				CD40	3	6	3	3	14.2	14.2	14.2	30.298	0	7.0284	1184300000	NaN	NaN	27.0404	29.3567	28.457	26.5813
	0	3.17297	tr|J9NZ75|J9NZ75_CANLF;tr|F1PWS8|F1PWS8_CANLF;sp|Q9BEA0|EGF_CANLF	tr|J9NZ75|J9NZ75_CANLF;tr|F1PWS8|F1PWS8_CANLF;sp|Q9BEA0|EGF_CANLF			J9NZ75				EGF	5	8	5	5	6	6	6	133.81	0	27.736	602780000	NaN	NaN	24.3459	28.3338	27.3971	26.8258
	0.0158237	0.0160364	sp|Q9N281|COHA1_CANLF;tr|F6XBP8|F6XBP8_CANLF;tr|E2QXQ6|E2QXQ6_CANLF	sp|Q9N281|COHA1_CANLF;tr|F6XBP8|F6XBP8_CANLF;tr|E2QXQ6|E2QXQ6_CANLF			Q9N281				COL17A1 BP180 BPAG2	12	30	12	12	8.5	8.5	8.5	163.07	0	68.59	4518500000	29.8553	30.1726	29.1511	29.9784	29.7778	29.4708
	0	1.66047	tr|C4TGH8|C4TGH8_CANLF	tr|C4TGH8|C4TGH8_CANLF			C4TGH8				F2RL1	5	14	5	5	13.6	13.6	13.6	44.067	0	14.708	1471300000	NaN	NaN	27.1298	29.1692	28.8673	28.3344
	0.493709	0.507315	tr|E2QUT9|E2QUT9_CANLF	tr|E2QUT9|E2QUT9_CANLF			E2QUT9				GGH	3	9	3	3	8.2	8.2	8.2	35.613	0	7.1373	1462100000	28.2318	28.2076	26.9627	28.4286	28.5019	27.9934
	0	0.213093	tr|E2QW66|E2QW66_CANLF	tr|E2QW66|E2QW66_CANLF			E2QW66				BMPR1A	2	6	2	2	5.8	5.8	5.8	60.221	0	63.838	281160000	NaN	NaN	25.9317	26.6034	26.4378	25.3933
	0.863338	-0.802034	tr|E2QWR0|E2QWR0_CANLF	tr|E2QWR0|E2QWR0_CANLF			E2QWR0				SFTPD	2	10	2	2	9.9	9.9	9.9	37.757	0	115.86	1547200000	27.9428	28.5754	28.9022	28.094	27.0264	27.8939
	0	2.85234	tr|E2QWS7|E2QWS7_CANLF	tr|E2QWS7|E2QWS7_CANLF			E2QWS7				OSMR	9	27	9	9	10.4	10.4	10.4	108.98	0	42.646	1751700000	NaN	NaN	26.2914	29.1975	29.2606	28.9732
	0.364676	-0.311739	tr|E2QWZ9|E2QWZ9_CANLF	tr|E2QWZ9|E2QWZ9_CANLF			E2QWZ9				MRPL32	2	5	2	2	12.2	12.2	12.2	21.155	0	11.643	404540000	26.0873	26.9032	26.107	25.7361	25.9133	26.5129
	0.278816	0.366935	tr|E2QXF2|E2QXF2_CANLF	tr|E2QXF2|E2QXF2_CANLF			E2QXF2				LGMN	2	12	2	2	5.8	5.8	5.8	49.456	0	27.544	341810000	26.0109	25.2153	25.9287	26.7437	26.3249	25.1871
	0.687741	-1.08689	tr|E2QXJ5|E2QXJ5_CANLF;REV__tr|B4YY04|B4YY04_CANLF	tr|E2QXJ5|E2QXJ5_CANLF			E2QXJ5				TCIRG1	6	9	6	6	7.3	7.3	7.3	93.07	0	13.438	621480000	27.7055	26.9315	27.193	24.8335	26.9983	26.7375
	0.222435	0.794491	tr|E2R455|E2R455_CANLF;tr|E2QXS1|E2QXS1_CANLF	tr|E2R455|E2R455_CANLF;tr|E2QXS1|E2QXS1_CANLF			E2R455				LIPA	2	6	2	2	5.3	5.3	5.3	45.062	0	6.273	202020000	NaN	23.822	26.2737	26.2249	25.4598	NaN
	0	1.68618	tr|F1PHD1|F1PHD1_CANLF;tr|E2QYL9|E2QYL9_CANLF	tr|F1PHD1|F1PHD1_CANLF;tr|E2QYL9|E2QYL9_CANLF			F1PHD1				PIEZO1	7	13	7	7	3.7	3.7	3.7	286.36	0	23.373	790480000	NaN	NaN	26.2283	28.1608	27.8907	27.6919
	0.8615	-0.528513	tr|E2QZ33|E2QZ33_CANLF	tr|E2QZ33|E2QZ33_CANLF			E2QZ33				TM7SF3	5	8	5	5	9.5	9.5	9.5	64.153	0	8.9857	1177000000	28.4205	28.2423	27.5791	27.5677	27.3268	27.762
	0.104223	0.0625076	tr|E2R117|E2R117_CANLF	tr|E2R117|E2R117_CANLF			E2R117				TIMM21	4	9	4	4	18.9	18.9	18.9	27.655	0	12.096	1258600000	27.9947	27.5971	27.9471	28.1703	27.5743	27.9819
	0	-2.83249	tr|E2R161|E2R161_CANLF;tr|E2R1Y6|E2R1Y6_CANLF	tr|E2R161|E2R161_CANLF;tr|E2R1Y6|E2R1Y6_CANLF			E2R161				SPP1	6	11	6	6	28.8	28.8	28.8	33.344	0	18.65	1022700000	29.1593	29.1828	27.6439	NaN	25.8295	NaN
	0.184712	0.18938	tr|E2R506|E2R506_CANLF	tr|E2R506|E2R506_CANLF			E2R506				GPR89A	3	18	3	3	11	11	11	52.978	0	22.511	830890000	26.3587	27.345	27.5987	27.4861	27.2243	27.1601
	0	2.18557	tr|J9P860|J9P860_CANLF;tr|J9P6M0|J9P6M0_CANLF;tr|E2R5F5|E2R5F5_CANLF	tr|J9P860|J9P860_CANLF;tr|J9P6M0|J9P6M0_CANLF;tr|E2R5F5|E2R5F5_CANLF			J9P860				SORL1	3	6	3	3	1.7	1.7	1.7	246.68	0	8.2144	240290000	NaN	NaN	24.0509	26.3099	26.0832	26.3163
	0.177445	-0.16408	tr|E2R5Z5|E2R5Z5_CANLF	tr|E2R5Z5|E2R5Z5_CANLF			E2R5Z5				TM9SF2	7	24	7	7	11	11	11	75.641	0	54.248	3445600000	29.3307	29.5116	29.2869	28.6949	29.0775	29.8646
	0.161948	0.183315	tr|E2R6Q7|E2R6Q7_CANLF	tr|E2R6Q7|E2R6Q7_CANLF			E2R6Q7				CTSB	10	79	10	10	31.3	31.3	31.3	37.685	0	171.55	19497000000	32.0387	32.1803	30.9458	31.7053	31.7667	32.2428
	0	1.85266	tr|E2R6Z2|E2R6Z2_CANLF;tr|J9P6L4|J9P6L4_CANLF	tr|E2R6Z2|E2R6Z2_CANLF			E2R6Z2				PTPRS	6	18	15	6	11.1	5.5	5.5	210.52	0	59.559	787480000	NaN	NaN	26.0721	27.9295	28.0727	27.7722
	0.526074	0.993511	tr|E2R7S1|E2R7S1_CANLF;tr|J9P8P9|J9P8P9_CANLF;tr|E2RF35|E2RF35_CANLF	tr|E2R7S1|E2R7S1_CANLF;tr|J9P8P9|J9P8P9_CANLF			E2R7S1				ATP2B1	5	9	12	5	13	5.3	5.3	134.66	0	12.441	740860000	25.805	25.3968	27.4929	27.8385	26.1743	27.6624
	0	-1.47897	tr|E2R830|E2R830_CANLF	tr|E2R830|E2R830_CANLF			E2R830				CPD	4	5	4	4	4.6	4.6	4.6	152.93	0	9.1629	220030000	24.7238	26.9601	26.3718	NaN	NaN	24.5396
	0.688804	-0.395817	tr|E2R8V9|E2R8V9_CANLF;tr|J9NRJ8|J9NRJ8_CANLF	tr|E2R8V9|E2R8V9_CANLF;tr|J9NRJ8|J9NRJ8_CANLF			E2R8V9				PGAP1	5	24	5	5	6.4	6.4	6.4	104.89	0	28.422	601030000	27.2241	26.9829	26.8549	26.2573	26.5464	27.0708
	0.0944272	-0.0701815	tr|E2R948|E2R948_CANLF	tr|E2R948|E2R948_CANLF			E2R948				VDAC2	20	330	20	20	66.3	66.3	66.3	31.578	0	297.17	82944000000	34.2458	34.2549	33.4634	33.9823	33.9297	33.8416
	0.282899	-0.241762	tr|E2R9T1|E2R9T1_CANLF	tr|E2R9T1|E2R9T1_CANLF			E2R9T1				SLC5A6	3	11	3	3	5	5	5	69.3	0	7.9539	649920000	26.957	26.818	27.2941	27.2216	26.9488	26.1733
	0.236115	-0.719293	tr|E2RA42|E2RA42_CANLF	tr|E2RA42|E2RA42_CANLF			E2RA42				UGT8	4	12	4	4	7.8	7.8	7.8	61.453	0	9.8249	829800000	28.8543	28.2907	25.0258	26.8749	26.5198	26.6182
	0	1.53374	tr|E2RAA0|E2RAA0_CANLF	tr|E2RAA0|E2RAA0_CANLF			E2RAA0				CYR61	5	10	5	5	13.6	13.6	13.6	41.769	0	9.1211	391910000	NaN	NaN	24.7845	27.8194	24.0828	27.0527
	0	-2.19268	tr|E2RAC8|E2RAC8_CANLF	tr|E2RAC8|E2RAC8_CANLF			E2RAC8				TEX264	3	7	3	3	11.5	11.5	11.5	33.92	0	23.637	327130000	27.2755	27.3753	26.4251	24.8326	NaN	NaN
	1.37318	-0.361472	tr|E2RB31|E2RB31_CANLF	tr|E2RB31|E2RB31_CANLF			E2RB31				HYOU1	19	67	19	19	28.3	28.3	28.3	111.43	0	99.994	4786800000	30.195	29.7799	30.0637	29.6401	29.6714	29.6426
	0.367894	-0.559277	tr|E2RB97|E2RB97_CANLF;tr|E2RB96|E2RB96_CANLF	tr|E2RB97|E2RB97_CANLF;tr|E2RB96|E2RB96_CANLF			E2RB97				HM13	3	11	3	3	7.7	7.7	7.7	41.475	0	7.2985	958290000	27.929	28.4091	26.8022	27.8692	27.1819	26.4114
	0	1.22488	tr|J9P1R7|J9P1R7_CANLF;tr|E2RBI7|E2RBI7_CANLF	tr|J9P1R7|J9P1R7_CANLF;tr|E2RBI7|E2RBI7_CANLF			J9P1R7				VSIG10	3	9	3	3	4.2	4.2	4.2	57.741	0	6.4013	1811700000	NaN	NaN	27.8361	29.1654	29.1649	28.8526
	0.0745064	-0.259776	tr|E2RBX6|E2RBX6_CANLF	tr|E2RBX6|E2RBX6_CANLF			E2RBX6				KDELC2	7	12	7	7	14.2	14.2	14.2	58.77	0	14.111	1035100000	28.0303	27.5188	26.1653	25.6643	29.1433	26.1274
	0.736999	1.02915	tr|E2RCD7|E2RCD7_CANLF	tr|E2RCD7|E2RCD7_CANLF			E2RCD7				MRPL2	4	9	4	4	17.6	17.6	17.6	33.029	0	35.711	662580000	27.1561	26.6378	25.0707	27.3403	27.5303	27.0814
	0	1.11962	tr|E2RCV4|E2RCV4_CANLF	tr|E2RCV4|E2RCV4_CANLF			E2RCV4				LOXL2	5	6	5	5	7.4	7.4	7.4	86.464	0	14.395	697050000	NaN	26.4733	NaN	28.2665	27.9652	26.5471
	0	NaN	tr|E2RDI0|E2RDI0_CANLF	tr|E2RDI0|E2RDI0_CANLF			E2RDI0				CNPY3	6	12	6	6	25.4	25.4	25.4	31.125	0	86.593	683330000	28.709	28.9266	26.243	NaN	NaN	NaN
	0	1.60705	tr|E2RE57|E2RE57_CANLF	tr|E2RE57|E2RE57_CANLF			E2RE57				ENTPD3	5	10	5	5	8.5	8.5	8.5	59.243	0	10.266	1039700000	NaN	NaN	26.6968	28.2768	28.3562	28.2786
	0.551023	0.305079	tr|E2RF18|E2RF18_CANLF	tr|E2RF18|E2RF18_CANLF			E2RF18				CYB5R1	11	26	11	11	31.8	31.8	31.8	33.943	0	32.277	5387200000	29.7804	30.1144	29.5122	30.2906	29.7628	30.2689
	0.384575	0.0933113	tr|E2RF90|E2RF90_CANLF	tr|E2RF90|E2RF90_CANLF			E2RF90				CD74	7	59	7	7	19.2	19.2	19.2	33.564	0	255.84	8023600000	30.6903	30.5275	30.356	30.6112	30.6787	30.5639
	0.0713151	0.0615362	tr|E2RFD0|E2RFD0_CANLF;tr|J9P3K8|J9P3K8_CANLF	tr|E2RFD0|E2RFD0_CANLF;tr|J9P3K8|J9P3K8_CANLF			E2RFD0				HMGCL	15	160	15	15	43.1	43.1	43.1	34.219	0	253.33	32156000000	32.7933	32.2832	32.4989	32.9719	32.7056	32.0826
	0	1.72542	tr|E2RG08|E2RG08_CANLF;tr|J9P9E3|J9P9E3_CANLF	tr|E2RG08|E2RG08_CANLF;tr|J9P9E3|J9P9E3_CANLF			E2RG08				LTBR	4	9	4	4	18.8	18.8	18.8	45.608	0	59.931	442430000	NaN	NaN	25.3522	27.3892	26.9548	26.8888
	0.6836	-0.263875	tr|E2RG47|E2RG47_CANLF	tr|E2RG47|E2RG47_CANLF			E2RG47				STT3B	11	43	12	11	15.9	15	15	93.67	0	55.39	5054600000	30.256	30.2048	29.7096	29.8132	29.8157	29.7498
	0	2.07493	tr|E2RGG8|E2RGG8_CANLF;tr|F1P7G8|F1P7G8_CANLF	tr|E2RGG8|E2RGG8_CANLF;tr|F1P7G8|F1P7G8_CANLF			E2RGG8				GFRA1	5	9	5	5	13	13	13	51.81	0	26.301	1051700000	NaN	NaN	26.2869	28.4377	28.4679	28.1797
	0	2.48861	tr|E2RGV7|E2RGV7_CANLF;tr|J9P4P2|J9P4P2_CANLF	tr|E2RGV7|E2RGV7_CANLF;tr|J9P4P2|J9P4P2_CANLF			E2RGV7				ATP13A3	3	5	3	3	3.1	3.1	3.1	138.4	0	7.8429	257280000	NaN	23.8882	NaN	26.581	26.3926	26.1569
	0.117229	-0.181866	tr|E2RGY9|E2RGY9_CANLF	tr|E2RGY9|E2RGY9_CANLF			E2RGY9				ELOVL1	3	23	3	3	13.7	13.7	13.7	32.539	0	96.017	1647400000	27.1539	28.584	28.9088	28.0284	28.3262	27.7464
	0.806448	0.337589	tr|E2RHN1|E2RHN1_CANLF	tr|E2RHN1|E2RHN1_CANLF			E2RHN1				GRN	3	8	3	3	12.7	12.7	12.7	61.98	0	24.083	540440000	26.3251	26.4775	26.5303	26.6194	26.578	27.1482
	0.881149	0.260611	tr|E2RHY7|E2RHY7_CANLF	tr|E2RHY7|E2RHY7_CANLF			E2RHY7				SERPINH1	26	253	26	26	62.9	62.9	62.9	46.582	0	323.31	63507000000	33.6692	33.298	33.2681	33.7656	33.6036	33.648
	0.44623	0.632085	tr|E2RI47|E2RI47_CANLF;tr|J9NXQ9|J9NXQ9_CANLF;tr|F1PKH4|F1PKH4_CANLF	tr|E2RI47|E2RI47_CANLF;tr|J9NXQ9|J9NXQ9_CANLF;tr|F1PKH4|F1PKH4_CANLF			E2RI47				TMEM9B	2	7	2	2	8.6	8.6	8.6	22.553	0	4.4271	305560000	26.4011	NaN	24.8906	26.5127	26.1901	26.1309
	0	1.60608	tr|J9P3H5|J9P3H5_CANLF;tr|E2RIF7|E2RIF7_CANLF	tr|J9P3H5|J9P3H5_CANLF;tr|E2RIF7|E2RIF7_CANLF			J9P3H5				FAM171A2	8	12	8	8	13.9	13.9	13.9	76.023	0	23.632	2316400000	NaN	NaN	27.853	29.66	29.4723	29.2448
	0	-0.0126565	tr|E2RK97|E2RK97_CANLF;tr|F1PYV2|F1PYV2_CANLF	tr|E2RK97|E2RK97_CANLF;tr|F1PYV2|F1PYV2_CANLF			E2RK97				MFSD6	3	10	3	3	7	7	7	87.786	0	26.741	396580000	NaN	NaN	26.5332	27.113	25.4877	26.9609
	0	2.45881	tr|E2RKJ3|E2RKJ3_CANLF	tr|E2RKJ3|E2RKJ3_CANLF			E2RKJ3				ACVR1	6	10	6	6	15.4	15.4	15.4	52.857	0	14.687	1489800000	NaN	NaN	26.4266	29.1708	28.8459	28.6395
	0	0.657721	tr|E2RKP5|E2RKP5_CANLF;sp|P15944|TRYT_CANLF;tr|F1PXI5|F1PXI5_CANLF	tr|E2RKP5|E2RKP5_CANLF			E2RKP5				HPN	6	11	6	6	18	18	18	44.904	0	40.505	2268100000	NaN	NaN	28.6425	29.4362	29.3297	29.1347
	0.691832	-1.0359	tr|E2RNJ1|E2RNJ1_CANLF;tr|E2RNJ3|E2RNJ3_CANLF	tr|E2RNJ1|E2RNJ1_CANLF;tr|E2RNJ3|E2RNJ3_CANLF			E2RNJ1				LAMP2	4	6	4	4	11.2	11.2	11.2	45.135	0	6.5516	954320000	28.3271	28.2094	27.1753	25.7427	27.6389	27.2224
	0.570514	-0.598441	tr|E2RNL2|E2RNL2_CANLF	tr|E2RNL2|E2RNL2_CANLF			E2RNL2				IGFBP7	3	7	3	3	14.2	14.2	14.2	28.899	0	8.8937	595410000	27.6655	27.3527	26.3399	26.9235	26.546	26.0934
	0.787738	0.412811	tr|E2RNQ5|E2RNQ5_CANLF	tr|E2RNQ5|E2RNQ5_CANLF			E2RNQ5				DHCR7	5	25	5	5	10.1	10.1	10.1	54.394	0	21.146	2982000000	29.3586	28.7237	28.6366	29.4324	29.1599	29.365
	0.388192	-0.235695	tr|E2RP67|E2RP67_CANLF;tr|J9P0C6|J9P0C6_CANLF	tr|E2RP67|E2RP67_CANLF			E2RP67				TBL2	15	42	15	15	34.8	34.8	34.8	49.991	0	140.75	5994400000	30.6373	30.4228	29.8161	30.1958	30.0072	29.9662
	0.994322	-0.558183	tr|E2RQ08|E2RQ08_CANLF	tr|E2RQ08|E2RQ08_CANLF			E2RQ08				RPN1	45	364	45	45	71.3	71.3	71.3	68.576	0	323.31	73061000000	34.4229	34.1991	33.5564	33.5473	33.5414	33.415
	0.360112	-0.20134	tr|J9NVV3|J9NVV3_CANLF;tr|E2RQC7|E2RQC7_CANLF	tr|J9NVV3|J9NVV3_CANLF;tr|E2RQC7|E2RQC7_CANLF			J9NVV3				LMF2	3	11	3	3	5.1	5.1	5.1	70.695	0	21.415	880280000	27.9069	27.3063	27.2974	27.5204	27.2653	27.1209
	0.138125	-0.172012	tr|E2RRH2|E2RRH2_CANLF;tr|J9P5W3|J9P5W3_CANLF	tr|E2RRH2|E2RRH2_CANLF;tr|J9P5W3|J9P5W3_CANLF			E2RRH2				MAGT1	7	25	7	7	16.9	16.9	16.9	41.635	0	76.799	5898600000	30.8241	30.4981	29.3351	30.1929	29.8912	30.0571
	0.287848	0.744838	tr|E2RRW9|E2RRW9_CANLF	tr|E2RRW9|E2RRW9_CANLF			E2RRW9				NAGA	2	5	2	2	5.6	5.6	5.6	46.406	0	7.1033	384610000	NaN	25.8904	25.0571	25.4611	25.4825	27.7122
	0.806073	2.40226	tr|E2RS68|E2RS68_CANLF	tr|E2RS68|E2RS68_CANLF			E2RS68				TSPAN15	5	16	5	5	16	16	16	33.117	0	34.553	2326500000	NaN	25.252	28.5713	29.6728	29.4168	28.8522
	0.945109	0.512165	tr|E2RSD0|E2RSD0_CANLF	tr|E2RSD0|E2RSD0_CANLF			E2RSD0				TM9SF3	10	39	10	10	18.4	18.4	18.4	67.542	0	52.388	6628900000	30.4693	29.8712	29.6426	30.4643	30.4314	30.6239
	0.812868	2.1028	tr|E2RSI2|E2RSI2_CANLF	tr|E2RSI2|E2RSI2_CANLF			E2RSI2				FLVCR1	4	7	4	4	10.3	10.3	10.3	60.186	0	11.737	656130000	22.9082	26.6363	26.2806	27.345	27.6517	27.1369
	0	2.73868	tr|E2RT70|E2RT70_CANLF	tr|E2RT70|E2RT70_CANLF			E2RT70				SDC1	6	7	6	6	17.4	17.4	17.4	32.726	0	13.978	1482800000	NaN	NaN	26.1365	28.698	29.2453	28.6822
	0.0185767	0.0334473	tr|E2RTD2|E2RTD2_CANLF	tr|E2RTD2|E2RTD2_CANLF			E2RTD2				SLC33A1	4	5	4	4	7.4	7.4	7.4	60.737	0	8.606	621370000	26.5902	25.8774	27.6067	27.3768	26.3627	26.4352
	0.31641	0.796726	tr|F1P6H7|F1P6H7_CANLF;sp|Q28275|FINC_CANLF	tr|F1P6H7|F1P6H7_CANLF			F1P6H7				FN1	2	129	47	47	27	27	1	267.24	0	323.31	19776000000	32.6849	31.0665	29.8161	32.6747	32.5141	30.7689
	0.265117	-0.178219	tr|F1P8G4|F1P8G4_CANLF	tr|F1P8G4|F1P8G4_CANLF			F1P8G4				FUCA2	3	9	3	3	10.8	10.8	10.8	46.691	0	16.425	451680000	26.9557	26.1929	26.4061	26.5607	26.0722	26.3871
	0	0.369156	tr|F1P9A7|F1P9A7_CANLF;tr|J9P3X8|J9P3X8_CANLF	tr|F1P9A7|F1P9A7_CANLF;tr|J9P3X8|J9P3X8_CANLF			F1P9A7				TTYH3	4	10	4	4	8.7	8.7	8.7	56.861	0	10.971	530020000	NaN	NaN	26.7747	27.2882	26.9845	27.1589
	0.949127	0.497557	tr|F1P9I9|F1P9I9_CANLF	tr|F1P9I9|F1P9I9_CANLF			F1P9I9				CTSA	3	7	3	3	4.4	4.4	4.4	56.524	0	17.077	1172100000	27.0643	27.5042	27.7927	28.1055	28.0419	27.7065
	0	2.42524	tr|F1P9V6|F1P9V6_CANLF;tr|J9P670|J9P670_CANLF	tr|F1P9V6|F1P9V6_CANLF;tr|J9P670|J9P670_CANLF			F1P9V6				SLC44A3	3	7	3	3	5.5	5.5	5.5	73.662	0	13.398	508450000	NaN	NaN	24.8745	27.7541	27.4231	26.7221
	0	0.786056	tr|F1PA89|F1PA89_CANLF	tr|F1PA89|F1PA89_CANLF			F1PA89				SLC39A10	6	24	6	6	20.4	20.4	20.4	55.012	0	88.1	1670000000	NaN	NaN	28.0946	28.9681	28.9503	28.7235
	0.715798	2.74025	tr|F1PAA3|F1PAA3_CANLF	tr|F1PAA3|F1PAA3_CANLF			F1PAA3				CDH3	8	24	8	8	14.2	14.2	14.2	91.153	0	65.135	2120300000	NaN	24.2629	28.5789	29.6113	29.0046	28.8677
	0.820066	3.85879	tr|F1PAF1|F1PAF1_CANLF;tr|F1PNA5|F1PNA5_CANLF;tr|E2R7J5|E2R7J5_CANLF	tr|F1PAF1|F1PAF1_CANLF			F1PAF1				EPHB2	14	27	16	14	21.5	19.5	19.5	107.44	0	182.74	5033300000	NaN	23.9629	29.3684	30.5663	30.5124	30.4946
	0.908144	-1.25038	tr|F1PAL6|F1PAL6_CANLF;tr|J9P7G3|J9P7G3_CANLF	tr|F1PAL6|F1PAL6_CANLF;tr|J9P7G3|J9P7G3_CANLF			F1PAL6				DDO	9	29	9	9	37.4	37.4	37.4	36.807	0	69.167	3002600000	30.4362	30.112	28.4672	28.7444	28.0453	28.4746
	0.202338	-0.273017	tr|F1PAM6|F1PAM6_CANLF;tr|J9P1R3|J9P1R3_CANLF	tr|F1PAM6|F1PAM6_CANLF;tr|J9P1R3|J9P1R3_CANLF			F1PAM6				SLC27A4	6	14	6	6	10.6	10.6	10.6	72.06	0	14.729	654700000	27.7733	27.3452	26.149	26.8187	27.1368	26.493
	0	1.93727	tr|F1PAX2|F1PAX2_CANLF;ENSEMBL:ENSBTAP00000031900;CON__ENSEMBL:ENSBTAP00000031900	tr|F1PAX2|F1PAX2_CANLF			F1PAX2				CP	10	26	10	10	14.6	14.6	14.6	122.56	0	36.851	996120000	NaN	NaN	26.3255	28.1559	28.5192	28.1132
	0	2.90087	tr|F1PCC1|F1PCC1_CANLF	tr|F1PCC1|F1PCC1_CANLF			F1PCC1				BMPR2	10	15	10	10	13.3	13.3	13.3	114.87	0	26.706	1585700000	NaN	NaN	26.0963	29.2662	29.0179	28.7073
	0	1.30313	tr|F1PE15|F1PE15_CANLF;tr|J9P1U1|J9P1U1_CANLF	tr|F1PE15|F1PE15_CANLF			F1PE15				GLIPR1	5	21	5	5	30.1	30.1	30.1	30.462	0	36.274	2398200000	NaN	NaN	28.1504	29.8257	29.5732	28.9618
	0.874216	1.98969	tr|F1PEJ5|F1PEJ5_CANLF	tr|F1PEJ5|F1PEJ5_CANLF			F1PEJ5				TSPAN33	2	5	2	2	6.7	6.7	6.7	31.529	0	9.8133	1423700000	24.9387	25.9264	28.3655	28.9092	28.3936	27.8969
	0.433906	-0.311336	tr|F1PEN8|F1PEN8_CANLF	tr|F1PEN8|F1PEN8_CANLF			F1PEN8				BCHE	3	7	3	3	5.1	5.1	5.1	68.518	0	6.6322	290180000	26.5245	NaN	25.9217	26.0789	26.0391	25.6173
	0.837478	0.920542	tr|F1PF09|F1PF09_CANLF	tr|F1PF09|F1PF09_CANLF			F1PF09				PMPCA	6	9	6	6	12.5	12.5	12.5	58.569	0	20.271	805190000	26.4385	25.7622	27.5082	27.5653	27.4848	27.4203
	0	2.36533	tr|F1PF95|F1PF95_CANLF	tr|F1PF95|F1PF95_CANLF			F1PF95				ALPL	2	7	2	2	4.4	4.4	4.4	57.598	0	13.029	683280000	NaN	NaN	25.384	27.625	28.001	27.622
	0	1.6332	tr|F1PG57|F1PG57_CANLF	tr|F1PG57|F1PG57_CANLF			F1PG57				LIPH	9	32	9	9	27.5	27.5	27.5	51.061	0	60.451	2548300000	NaN	NaN	27.9658	29.674	29.4846	29.6385
	0	NaN	tr|J9P0D9|J9P0D9_CANLF;tr|F1PG85|F1PG85_CANLF	tr|J9P0D9|J9P0D9_CANLF;tr|F1PG85|F1PG85_CANLF			J9P0D9				SLC44A2	4	7	4	4	6.5	6.5	6.5	79.927	0	11.437	453290000	NaN	NaN	NaN	27.0745	27.8108	26.6855
	0.323027	0.178933	tr|F1PH09|F1PH09_CANLF;tr|J9PA58|J9PA58_CANLF	tr|F1PH09|F1PH09_CANLF;tr|J9PA58|J9PA58_CANLF			F1PH09				CENPV	9	68	9	9	58.8	58.8	58.8	19.428	0	102.03	16909000000	31.6483	31.7915	31.1951	31.9053	31.8161	31.4502
	0.253072	-0.418748	tr|F1PHU8|F1PHU8_CANLF	tr|F1PHU8|F1PHU8_CANLF			F1PHU8				TMED1	2	5	2	2	9.7	9.7	9.7	25.147	0	4.3891	200940000	26.3042	25.4063	24.4737	24.6225	24.5508	25.7547
	0	2.76966	tr|F1PHY9|F1PHY9_CANLF	tr|F1PHY9|F1PHY9_CANLF			F1PHY9				IGSF9	4	15	4	4	5.2	5.2	5.2	126.66	0	102.17	559500000	NaN	NaN	24.6987	27.1451	27.6935	27.5664
	0	1.72226	tr|F1PHZ1|F1PHZ1_CANLF;tr|F1PKX9|F1PKX9_CANLF	tr|F1PHZ1|F1PHZ1_CANLF;tr|F1PKX9|F1PKX9_CANLF			F1PHZ1				PLXNA2	25	75	34	34	23.1	23.1	18.7	220.57	0	139.65	8066400000	NaN	NaN	29.5502	31.4292	31.2653	31.123
	1.11882	-0.613331	tr|F1PID8|F1PID8_CANLF;tr|E2RJ60|E2RJ60_CANLF	tr|F1PID8|F1PID8_CANLF;tr|E2RJ60|E2RJ60_CANLF			F1PID8				DDX17	33	266	44	44	54.3	54.3	43.3	81.048	0	323.31	74522000000	34.4644	34.2271	33.6505	33.6442	33.5223	33.3355
	0.461247	0.645106	tr|F1PIF2|F1PIF2_CANLF	tr|F1PIF2|F1PIF2_CANLF			F1PIF2				CTSZ	4	12	4	4	15.3	15.3	15.3	29.288	0	24.563	4087800000	28.1152	29.96	29.1004	29.3013	29.5566	30.2531
	0	1.54945	tr|J9NU59|J9NU59_CANLF;tr|F1PIL9|F1PIL9_CANLF;tr|J9P9X0|J9P9X0_CANLF	tr|J9NU59|J9NU59_CANLF;tr|F1PIL9|F1PIL9_CANLF;tr|J9P9X0|J9P9X0_CANLF			J9NU59				IL1RAP	4	9	4	4	6.3	6.3	6.3	65.585	0	6.5286	575240000	NaN	NaN	25.8526	27.8341	27.61	26.762
	0	3.80664	tr|F1PIR6|F1PIR6_CANLF;tr|J9NY06|J9NY06_CANLF	tr|F1PIR6|F1PIR6_CANLF;tr|J9NY06|J9NY06_CANLF			F1PIR6				PCDH7	4	10	4	4	5.8	5.8	5.8	102.67	0	24.279	482520000	NaN	NaN	23.343	26.1644	27.6921	27.5923
	0.457189	0.350191	tr|F1PIT4|F1PIT4_CANLF	tr|F1PIT4|F1PIT4_CANLF			F1PIT4				CD63	3	6	3	3	13.4	13.4	13.4	25.614	0	4.9752	829530000	27.4427	NaN	27.0946	27.3694	28.0646	27.4225
	0.883871	-0.522154	tr|F1PJP5|F1PJP5_CANLF	tr|F1PJP5|F1PJP5_CANLF			F1PJP5				STT3A	16	81	17	17	21.1	21.1	20.2	89.552	0	94.859	15715000000	32.2401	31.9009	31.3407	31.4648	31.2673	31.1831
	0.833617	3.90723	tr|J9NTL4|J9NTL4_CANLF;tr|F1PK94|F1PK94_CANLF	tr|J9NTL4|J9NTL4_CANLF;tr|F1PK94|F1PK94_CANLF			J9NTL4				CDH17	10	22	10	10	16.1	16.1	16.1	91.661	0	37.092	2088300000	22.6643	NaN	28.0468	29.3179	29.183	29.2874
	0	2.52708	tr|F1PKD4|F1PKD4_CANLF	tr|F1PKD4|F1PKD4_CANLF			F1PKD4				TMEM67	5	5	5	5	6	6	6	111.17	0	9.3563	429570000	NaN	NaN	24.574	27.1289	27.1491	27.0253
	0	1.25683	tr|F1PKV5|F1PKV5_CANLF	tr|F1PKV5|F1PKV5_CANLF			F1PKV5				FLT1	9	26	9	9	7	7	7	150.72	0	41.004	1569900000	NaN	NaN	27.565	29.2475	29.0056	28.2124
	0.91778	-1.04456	tr|F1PN70|F1PN70_CANLF;tr|F1PYJ9|F1PYJ9_CANLF	tr|F1PN70|F1PN70_CANLF;tr|F1PYJ9|F1PYJ9_CANLF			F1PN70				PGS1	2	5	2	2	5.6	5.6	5.6	53.32	0	4.4006	135590000	25.3941	25.686	NaN	23.9911	24.2859	25.2094
	0	-2.64571	tr|F1PN78|F1PN78_CANLF;tr|J9P2M7|J9P2M7_CANLF	tr|F1PN78|F1PN78_CANLF;tr|J9P2M7|J9P2M7_CANLF			F1PN78				EMC1	7	7	7	7	8.7	8.7	8.7	111.78	0	15.3	631580000	28.3029	28.2664	27.4441	NaN	NaN	25.3587
	0	3.10395	tr|F1PPA1|F1PPA1_CANLF	tr|F1PPA1|F1PPA1_CANLF			F1PPA1				GPC1	5	7	5	5	13.3	13.3	13.3	55.996	0	14.18	1295300000	NaN	NaN	25.6149	28.8572	28.793	28.5064
	0.42126	0.400646	tr|F1PPG9|F1PPG9_CANLF;tr|J9P3Z1|J9P3Z1_CANLF	tr|F1PPG9|F1PPG9_CANLF;tr|J9P3Z1|J9P3Z1_CANLF			F1PPG9				SLC37A4	4	18	4	4	10.7	10.7	10.7	46.292	0	19.833	2397600000	29.0549	28.923	27.7874	28.8921	29.0638	29.0114
	0	2.34891	tr|F1PPP5|F1PPP5_CANLF;tr|F1PS94|F1PS94_CANLF	tr|F1PPP5|F1PPP5_CANLF;tr|F1PS94|F1PS94_CANLF			F1PPP5				NOTCH2	17	38	17	17	11.1	11.1	11.1	247.61	0	150.52	4239100000	NaN	NaN	28.0422	30.5393	30.47	30.164
	0	2.87807	tr|F1PRN3|F1PRN3_CANLF	tr|F1PRN3|F1PRN3_CANLF			F1PRN3				RNF149	3	7	3	3	14.7	14.7	14.7	26.368	0	33.478	284970000	NaN	NaN	23.6474	26.5091	26.5831	26.4843
	0.19218	0.266208	tr|F1PRS5|F1PRS5_CANLF	tr|F1PRS5|F1PRS5_CANLF			F1PRS5				ATP13A1	14	34	14	14	12.9	12.9	12.9	133.2	0	48.781	2303800000	28.8181	29.351	27.5644	28.9079	28.7768	28.8474
	0	2.50464	tr|F1PSF0|F1PSF0_CANLF	tr|F1PSF0|F1PSF0_CANLF			F1PSF0				IL1R1	5	7	5	5	11.7	11.7	11.7	65.504	0	14.678	440080000	NaN	NaN	24.6232	27.075	27.3336	26.9749
	0.8948	-0.353926	tr|F1PSG1|F1PSG1_CANLF	tr|F1PSG1|F1PSG1_CANLF			F1PSG1				ERMP1	19	97	19	19	21.8	21.8	21.8	99.924	0	133.74	11827000000	31.4215	31.577	30.9677	30.9529	31.0163	30.9352
	0.727119	0.57284	tr|F1PSK9|F1PSK9_CANLF;tr|J9P6V8|J9P6V8_CANLF;tr|J9JHT5|J9JHT5_CANLF	tr|F1PSK9|F1PSK9_CANLF;tr|J9P6V8|J9P6V8_CANLF;tr|J9JHT5|J9JHT5_CANLF			F1PSK9				NUP210	20	60	20	20	14.2	14.2	14.2	200.59	0	83.924	6781100000	30.6505	29.7733	29.5398	30.7197	30.6496	30.3128
	0.519806	1.23813	tr|F1PSP6|F1PSP6_CANLF;tr|J9NRZ7|J9NRZ7_CANLF	tr|F1PSP6|F1PSP6_CANLF;tr|J9NRZ7|J9NRZ7_CANLF			F1PSP6				SCPEP1	4	6	4	4	10	10	10	51.107	0	10.045	1094500000	25.0381	26.0103	28.5464	27.7471	27.7365	27.8257
	0.640934	-1.56804	tr|F1PTP6|F1PTP6_CANLF	tr|F1PTP6|F1PTP6_CANLF			F1PTP6				P4HA2	9	11	9	9	22.1	22.1	22.1	60.647	0	38.335	1655300000	29.7201	29.8149	26.4612	27.0776	27.0022	27.2123
	0.713471	-0.364867	tr|F1PV92|F1PV92_CANLF	tr|F1PV92|F1PV92_CANLF			F1PV92				CS	12	46	12	12	32.3	32.3	32.3	52.113	0	84.572	7961300000	30.8716	30.7965	30.5773	30.514	30.6757	29.9611
	0.514211	0.253617	tr|F1PVD4|F1PVD4_CANLF	tr|F1PVD4|F1PVD4_CANLF			F1PVD4				SUOX	9	22	9	9	16	16	16	75.713	0	23.818	3612900000	29.3452	29.5955	28.8801	29.5967	29.5628	29.4222
	0	-3.21913	tr|F1PVL7|F1PVL7_CANLF	tr|F1PVL7|F1PVL7_CANLF			F1PVL7				POFUT1	3	7	3	3	8.4	8.4	8.4	44.24	0	16.173	341870000	27.9988	27.6864	24.8615	NaN	NaN	23.6298
	0	1.53863	tr|F1PVZ1|F1PVZ1_CANLF	tr|F1PVZ1|F1PVZ1_CANLF			F1PVZ1				CHRM4	4	13	4	4	15.3	15.3	15.3	52.939	0	44.65	1784900000	NaN	NaN	27.5269	29.3268	29.194	28.6758
	0.183289	0.287367	tr|F1PWE3|F1PWE3_CANLF	tr|F1PWE3|F1PWE3_CANLF			F1PWE3				TM9SF4	5	9	5	5	10.7	10.7	10.7	74.495	0	10.119	479200000	25.6667	26.772	27.0685	NaN	26.5343	27.0453
	0.284783	0.242113	tr|F1PWK3|F1PWK3_CANLF	tr|F1PWK3|F1PWK3_CANLF			F1PWK3				PRCP	3	7	3	3	8.5	8.5	8.5	56.109	0	6.5669	514770000	25.9733	26.8757	26.3989	27.0698	26.3048	26.5996
	1.08805	0.724724	tr|F1PWN2|F1PWN2_CANLF;tr|F6X8D7|F6X8D7_CANLF	tr|F1PWN2|F1PWN2_CANLF;tr|F6X8D7|F6X8D7_CANLF			F1PWN2				SLC2A1	5	15	5	5	10.6	10.6	10.6	54.1	0	14.03	1619100000	27.3535	27.5264	28.3649	28.4562	28.4446	28.5181
	0	2.42722	tr|F1PX48|F1PX48_CANLF	tr|F1PX48|F1PX48_CANLF			F1PX48				HFE	6	15	6	6	19.8	19.8	19.8	41.283	0	17.71	1391500000	NaN	NaN	26.3418	28.5943	28.6837	29.0292
	0	-0.620123	tr|F1PXK2|F1PXK2_CANLF	tr|F1PXK2|F1PXK2_CANLF			F1PXK2				UNC93B1	2	6	2	2	5.8	5.8	5.8	58.183	0	7.7562	96509000	NaN	NaN	24.8897	23.1484	24.7207	24.9398
	0	1.68576	tr|F1PXM6|F1PXM6_CANLF	tr|F1PXM6|F1PXM6_CANLF			F1PXM6				PLXNB3	13	22	14	13	11.1	10.7	10.7	207.13	0	83.701	2389200000	NaN	NaN	27.8167	29.8259	29.5212	29.1604
	0.0384669	0.0531794	tr|F1PZL5|F1PZL5_CANLF	tr|F1PZL5|F1PZL5_CANLF			F1PZL5				PLOD2	10	18	10	10	17.2	17.2	17.2	87.631	0	32.013	1730400000	27.5008	28.8478	28.3548	28.6385	28.4346	27.7899
	0	0.897521	tr|F1Q051|F1Q051_CANLF	tr|F1Q051|F1Q051_CANLF			F1Q051				KIRREL	16	42	16	16	30.7	30.7	30.7	82.875	0	142.27	5049300000	NaN	NaN	29.5966	30.6863	30.4762	30.32
	0	3.18921	tr|J9P9D2|J9P9D2_CANLF;tr|F1Q0F2|F1Q0F2_CANLF	tr|J9P9D2|J9P9D2_CANLF;tr|F1Q0F2|F1Q0F2_CANLF			J9P9D2				SLC31A1	2	5	2	2	16.9	16.9	16.9	19.823	0	24.847	938940000	NaN	NaN	25.0023	28.8297	28.2266	27.5183
	0	NaN	tr|F1Q0Y7|F1Q0Y7_CANLF;tr|F1Q0Y8|F1Q0Y8_CANLF;tr|E2R0U0|E2R0U0_CANLF	tr|F1Q0Y7|F1Q0Y7_CANLF;tr|F1Q0Y8|F1Q0Y8_CANLF;tr|E2R0U0|E2R0U0_CANLF			F1Q0Y7				NRG1	4	5	4	4	7.5	7.5	7.5	70.112	0	34.852	454970000	NaN	NaN	NaN	28.2962	26.5173	26.1666
	0	NaN	tr|F1Q1F5|F1Q1F5_CANLF	tr|F1Q1F5|F1Q1F5_CANLF			F1Q1F5				FKBP9	7	16	7	7	11.9	11.9	11.9	59.392	0	17.613	1895300000	30.6694	29.8666	28.1246	NaN	NaN	NaN
	1.37234	-0.291663	tr|F1Q260|F1Q260_CANLF	tr|F1Q260|F1Q260_CANLF			F1Q260				LAMP1	3	12	3	3	8.9	8.9	8.9	44.616	0	13.684	3635700000	29.5773	29.7461	29.4287	29.3681	29.2595	29.2495
	0	1.57788	tr|F1Q3G2|F1Q3G2_CANLF;tr|F1PSS7|F1PSS7_CANLF	tr|F1Q3G2|F1Q3G2_CANLF			F1Q3G2				SLIT3	22	57	23	23	22.4	22.4	21.7	145.16	0	131.1	5092500000	NaN	NaN	29.0089	30.8623	30.6273	30.2707
	3.29669	0.0846049	tr|F1Q3W8|F1Q3W8_CANLF	tr|F1Q3W8|F1Q3W8_CANLF			F1Q3W8				SDHB	7	31	7	7	23.6	23.6	23.6	31.508	0	28.069	5538100000	29.9889	29.9803	29.9796	30.0571	30.063	30.0825
	0	1.78507	tr|F1Q440|F1Q440_CANLF;tr|F1Q441|F1Q441_CANLF	tr|F1Q440|F1Q440_CANLF;tr|F1Q441|F1Q441_CANLF			F1Q440				CA12	7	30	7	7	35.6	35.6	35.6	34.894	0	42.689	2239800000	NaN	NaN	27.6388	29.7089	29.2609	29.3019
	0.289658	0.180477	tr|F2Z4P9|F2Z4P9_CANLF;sp|P24409|RAB10_CANLF;tr|J9NUV0|J9NUV0_CANLF	tr|F2Z4P9|F2Z4P9_CANLF;sp|P24409|RAB10_CANLF;tr|J9NUV0|J9NUV0_CANLF			F2Z4P9				RAB10	15	119	18	17	75	69.5	59.5	22.541	0	176.99	43928000000	33.252	33.0913	32.4482	33.2034	33.01	33.1196
	0	2.75873	tr|F6UXL3|F6UXL3_CANLF	tr|F6UXL3|F6UXL3_CANLF			F6UXL3				ADAM15	3	7	3	3	4.4	4.4	4.4	92.621	0	25.688	374770000	NaN	NaN	24.1544	27.128	26.9385	26.673
	0.960343	-0.499276	tr|F6V1W9|F6V1W9_CANLF	tr|F6V1W9|F6V1W9_CANLF			F6V1W9				TF	12	42	12	12	11.9	11.9	11.9	110.51	0	169.07	5978900000	30.8566	30.3365	30.0661	29.9546	29.7791	30.0276
	0.343711	0.191619	tr|F6V9R9|F6V9R9_CANLF	tr|F6V9R9|F6V9R9_CANLF			F6V9R9				GLG1	10	26	10	10	9.4	9.4	9.4	134.94	0	64.642	2967600000	28.769	28.9152	29.2423	28.8	29.3577	29.3437
	0.201953	0.601484	tr|J9NTA1|J9NTA1_CANLF	tr|J9NTA1|J9NTA1_CANLF			J9NTA1				METTL7A	5	18	5	5	20.8	20.8	20.8	28.05	0	43.397	9509100000	32.449	29.6586	28.6249	31.0033	30.9244	30.6092
	0	NaN	tr|J9NUZ6|J9NUZ6_CANLF	tr|J9NUZ6|J9NUZ6_CANLF			J9NUZ6				PPIC	4	11	4	4	19.1	19.1	19.1	22.02	0	24.719	600170000	29.0655	28.1884	26.3342	NaN	NaN	NaN
	0	0.669319	tr|J9NWL5|J9NWL5_CANLF;tr|J9P5I6|J9P5I6_CANLF	tr|J9NWL5|J9NWL5_CANLF;tr|J9P5I6|J9P5I6_CANLF			J9NWL5				IGSF8	4	10	4	4	10.5	10.5	10.5	61.992	0	15.093	1175900000	NaN	NaN	27.686	28.4446	28.3469	28.2744
	0.0315065	-0.0352828	tr|J9NXT3|J9NXT3_CANLF	tr|J9NXT3|J9NXT3_CANLF			J9NXT3				SGPP1	4	5	4	4	11.7	11.7	11.7	49.512	0	26.356	658670000	NaN	27.4921	26.7564	27.3345	26.7098	27.2225
	0.647074	0.543149	tr|J9P2J0|J9P2J0_CANLF	tr|J9P2J0|J9P2J0_CANLF			J9P2J0				BOLA1	5	13	5	5	49.6	49.6	49.6	13.431	0	19.269	903640000	27.7319	27.0359	26.5024	27.3895	27.838	27.6722
	0.0527668	-0.152757	tr|J9P2U5|J9P2U5_CANLF	tr|J9P2U5|J9P2U5_CANLF			J9P2U5				SLC35F6	3	5	3	3	9.7	9.7	9.7	40.379	0	20.185	610540000	24.847	28.0434	26.874	26.3354	27.0821	25.8886
	0.0776648	0.143472	tr|J9P2W1|J9P2W1_CANLF	tr|J9P2W1|J9P2W1_CANLF			J9P2W1				MRPL21	3	12	3	3	18.9	18.9	18.9	22.624	0	15.274	1026000000	28.0531	28.0936	26.2284	27.4138	27.3671	28.0246
	0	NaN	tr|J9P5H0|J9P5H0_CANLF	tr|J9P5H0|J9P5H0_CANLF			J9P5H0				WNT5A	2	8	6	6	15.3	15.3	5.3	42.41	0	8.9327	1222800000	NaN	NaN	NaN	28.731	28.6957	28.656
	0.858418	-1.89596	tr|J9P692|J9P692_CANLF	tr|J9P692|J9P692_CANLF			J9P692				EMC7	3	12	3	3	13.5	13.5	13.5	29.143	0	7.4976	907040000	28.8794	28.6634	27.1359	25.4907	NaN	27.1699
	1.10192	-0.447302	tr|J9P702|J9P702_CANLF	tr|J9P702|J9P702_CANLF			J9P702				GNG12	5	17	5	5	70.8	70.8	70.8	8.0242	0	49.966	3327600000	29.2279	29.5571	29.6797	28.9038	28.908	29.311
	0	0.999652	tr|J9PAS5|J9PAS5_CANLF	tr|J9PAS5|J9PAS5_CANLF			J9PAS5				KIAA1161	5	10	5	5	10.9	10.9	10.9	80.97	0	15.625	1400000000	NaN	NaN	27.6285	29.1079	28.672	28.1044
	0.559919	-1.60389	tr|J9PB64|J9PB64_CANLF	tr|J9PB64|J9PB64_CANLF			J9PB64				TOR1AIP2	3	6	4	3	8.8	7.3	7.3	51.908	0	7.2682	299550000	27.3939	27.3644	24.5912	24.6878	25.0041	NaN
	0	2.15036	tr|Q004B2|Q004B2_CANLF;tr|Q004A8|Q004A8_CANLF;tr|Q004B0|Q004B0_CANLF;tr|J9P5R8|J9P5R8_CANLF;tr|Q004B1|Q004B1_CANLF;tr|J9NYC5|J9NYC5_CANLF;tr|E2R9V7|E2R9V7_CANLF;tr|E2R9W0|E2R9W0_CANLF;tr|F1PCZ8|F1PCZ8_CANLF	tr|Q004B2|Q004B2_CANLF;tr|Q004A8|Q004A8_CANLF;tr|Q004B0|Q004B0_CANLF;tr|J9P5R8|J9P5R8_CANLF;tr|Q004B1|Q004B1_CANLF			Q004B2				CEACAM1	5	18	8	8	16.7	16.7	10.4	56.421	0	46	1139100000	NaN	NaN	26.326	28.5227	28.3071	28.5993
	0	1.43822	tr|Q1W2J9|Q1W2J9_CANLF	tr|Q1W2J9|Q1W2J9_CANLF			Q1W2J9					2	8	2	2	9.3	9.3	9.3	27.779	0	22.05	1222500000	NaN	NaN	27.0804	28.6967	28.3746	28.4846

## Sheet: 6a. PTEN proteome 4h
Significant	-log(P-value)	Difference	Protein IDs	Majority protein IDs	Protein names	Only identified by site	Reverse	Potential contaminant	Peptides	Razor + unique peptides	Unique peptides	Sequence coverage [%]	Unique + razor sequence coverage [%]	Unique sequence coverage [%]	Mol. weight [kDa]	Q-value	Score	Intensity	MS/MS count	LFQ intensity 4h_1	LFQ intensity 4h_2	LFQ intensity 4h_3	LFQ intensity 4h_4	LFQ intensity 4h_5	LFQ intensity 4h_6	LFQ intensity ctrl_1	LFQ intensity ctrl_2	LFQ intensity ctrl_3	LFQ intensity ctrl_4	LFQ intensity ctrl_5	LFQ intensity ctrl_6
+	4.07074	1.97948	tr|E2RMM5|E2RMM5_CANLF	tr|E2RMM5|E2RMM5_CANLF					8	2	2	43.4	17.6	17.6	23.129	0	28.272	3202700000	57	NaN	27.4324	27.7772	28.1594	27.5565	28.1183	24.9849	26.2298	26.2389	25.914	25.7788	NaN
+	3.89888	1.33285	tr|F1PE94|F1PE94_CANLF;tr|J9P4Z5|J9P4Z5_CANLF;tr|J9NZB7|J9NZB7_CANLF	tr|F1PE94|F1PE94_CANLF;tr|J9P4Z5|J9P4Z5_CANLF					7	7	7	28.5	28.5	28.5	68.691	0	211.58	6061200000	82	28.9618	27.9237	28.6738	28.3835	28.5807	28.3698	27.4309	27.135	27.1823	26.5929	27.4058	26.7575
+	5.61958	1.60481	tr|J9P9K5|J9P9K5_CANLF	tr|J9P9K5|J9P9K5_CANLF					4	2	2	25.7	16.2	16.2	8.1274	0	10.164	63428000000	71	32.3681	32.2763	31.8832	31.5492	32.1911	31.9491	30.358	30.2878	30.3344	30.7106	30.4661	30.7705
	1.07937	0.47208	iRT	iRT					11	11	11	100	100	100	14.166	0	311.65	372390000000	289	33.9405	34.0965	34.7997	34.2042	33.9713	34.4088	34.5292	33.6944	33.8228	33.5326	33.2449	33.8349
	0.00107256	-0.000386874	tr|E2RDJ9|E2RDJ9_CANLF;sp|A0M8U6|TES_CANLF;tr|F1PFX9|F1PFX9_CANLF	tr|E2RDJ9|E2RDJ9_CANLF;sp|A0M8U6|TES_CANLF;tr|F1PFX9|F1PFX9_CANLF					17	17	17	48.3	48.3	48.3	46.951	0	235.26	30185000000	199	30.2826	30.4208	30.1733	30.2675	29.7709	30.1957	30.0254	30.1049	30.1522	30.1658	30.4794	30.0783
	0.0296573	-0.0101279	sp|A0M8V0|CAZA2_CANLF	sp|A0M8V0|CAZA2_CANLF					16	16	13	66.8	66.8	58.4	32.981	0	323.31	92596000000	346	31.9433	31.8183	31.7716	32.1938	32.0245	32.1001	31.8459	31.8221	31.7838	32.2274	32.2478	32.1262
	0.048333	-0.0254201	sp|A1XD97|TFP11_CANLF	sp|A1XD97|TFP11_CANLF					16	16	16	24.7	24.7	24.7	96.566	0	38.711	11624000000	116	29.3458	28.9303	29.4448	28.5924	28.8699	28.73	29.3674	29.2131	28.8897	28.7911	28.7935	28.853
	0.647881	-0.288022	sp|A2SXS5|MEN1_CANLF;tr|A0A158UUB5|A0A158UUB5_CANLF	sp|A2SXS5|MEN1_CANLF					9	9	9	22.9	22.9	22.9	67.962	0	323.31	6709300000	56	28.195	27.6215	28.3033	28.3118	NaN	28.254	28.2848	28.166	28.6379	29.0028	28.0343	28.4477
	0.44534	-0.0900628	sp|B6V8E6|CTNB1_CANLF	sp|B6V8E6|CTNB1_CANLF					35	30	30	58.4	53	53	85.51	0	323.31	334450000000	1168	33.3552	33.7045	33.7257	33.6014	33.8399	33.5816	33.5417	33.6932	33.6707	33.8901	33.8282	33.8024
	1.65545	0.337708	sp|D0VWQ3|RL18_CANLF	sp|D0VWQ3|RL18_CANLF					5	5	5	26.1	26.1	26.1	21.592	0	231.81	131640000000	152	32.4499	32.8109	32.5413	32.4275	32.4176	32.5013	32.3271	32.0345	32.4543	31.8236	32.2957	31.7766
	0.48351	0.194767	tr|A0A075B5H7|A0A075B5H7_CANLF;tr|J9NU47|J9NU47_CANLF;sp|D0VWQ4|RL36A_CANLF;tr|J9P9C5|J9P9C5_CANLF;tr|J9JHU1|J9JHU1_CANLF;tr|J9NWR0|J9NWR0_CANLF;tr|J9P6P5|J9P6P5_CANLF;tr|J9P1B4|J9P1B4_CANLF	tr|A0A075B5H7|A0A075B5H7_CANLF;tr|J9NU47|J9NU47_CANLF;sp|D0VWQ4|RL36A_CANLF;tr|J9P9C5|J9P9C5_CANLF;tr|J9JHU1|J9JHU1_CANLF;tr|J9NWR0|J9NWR0_CANLF;tr|J9P6P5|J9P6P5_CANLF;tr|J9P1B4|J9P1B4_CANLF					4	4	4	32.4	32.4	32.4	12.309	0	24.779	36545000000	40	30.3388	30.6811	30.5786	31.2296	30.6098	31.383	30.7082	30.5463	30.6615	30.4768	30.6509	30.449
	0.036037	-0.0159343	tr|A0A0A0MPD2|A0A0A0MPD2_CANLF;sp|D0VWQ5|RL19_CANLF	tr|A0A0A0MPD2|A0A0A0MPD2_CANLF;sp|D0VWQ5|RL19_CANLF					6	6	6	23.2	23.2	23.2	23.247	0	148.26	67295000000	124	31.4992	31.5191	31.5171	31.7867	31.2295	31.4082	31.3992	31.4668	31.4412	31.182	32.0568	31.2597
	0.169585	-0.0483069	sp|E2QRY6|NNRE_CANLF;tr|A0A0A0MPD3|A0A0A0MPD3_CANLF	sp|E2QRY6|NNRE_CANLF;tr|A0A0A0MPD3|A0A0A0MPD3_CANLF					6	6	6	45.1	45.1	45.1	31.175	0	86.733	6374700000	71	27.9609	28.3447	27.9944	28.0014	28.0333	27.8106	28.3434	27.9495	27.8741	27.9845	28.211	28.1209
	0.412279	0.107211	sp|E2QUI9|NNRD_CANLF;tr|E2QUG8|E2QUG8_CANLF	sp|E2QUI9|NNRD_CANLF;tr|E2QUG8|E2QUG8_CANLF					15	15	15	56.2	56.2	56.2	36.941	0	323.31	33239000000	277	30.2607	30.5074	30.4733	30.5371	30.6129	30.4804	30.1372	30.3824	30.0809	30.6406	30.616	30.7561
	0.261475	0.099	sp|E2QXF3|RL15_CANLF	sp|E2QXF3|RL15_CANLF					8	8	8	39.2	39.2	39.2	24.146	0	182.79	73011000000	131	31.5677	31.7095	31.4033	31.5755	30.9736	31.4182	31.3926	31.4646	31.5878	30.8836	31.3828	30.851
	0.356052	0.143731	tr|A0A0A0MPB8|A0A0A0MPB8_CANLF;sp|E2R766|EXOC6_CANLF;tr|J9JHE5|J9JHE5_CANLF	tr|A0A0A0MPB8|A0A0A0MPB8_CANLF;sp|E2R766|EXOC6_CANLF;tr|J9JHE5|J9JHE5_CANLF					8	7	7	13	12	12	93.43	0	107.24	3797000000	58	27.3699	27.3573	27.2611	NaN	27.1545	27.2838	26.6907	27.4357	27.1644	27.5945	26.8225	27.7245
	0.154157	0.135461	sp|E2R9X2|ARI5B_CANLF;tr|A0A0A0MPC6|A0A0A0MPC6_CANLF;tr|J9NV13|J9NV13_CANLF	sp|E2R9X2|ARI5B_CANLF;tr|A0A0A0MPC6|A0A0A0MPC6_CANLF;tr|J9NV13|J9NV13_CANLF					10	10	10	15.8	15.8	15.8	129.97	0	44.781	1612200000	27	27.0719	26.2873	NaN	NaN	NaN	26.6979	26.3739	NaN	NaN	NaN	26.7266	26.5584
	0.0121692	0.00430546	sp|E2RDZ6|SIR5_CANLF	sp|E2RDZ6|SIR5_CANLF					10	10	10	41.3	41.3	41.3	33.942	0	204.14	22264000000	123	30.1293	29.8109	29.5313	29.8301	30.1442	29.7864	29.6606	29.9094	30.0772	29.8402	29.8511	30.2976
	0.267579	0.133839	sp|E2RG47|STT3B_CANLF	sp|E2RG47|STT3B_CANLF					11	10	10	17.6	16.7	16.7	93.67	0	119.62	13374000000	135	29.4856	29.4191	29.1472	28.3347	29.1859	28.8803	29.0876	28.7466	28.9996	29.1926	28.6816	28.8149
	0.0531709	0.0306882	tr|K9J6N9|K9J6N9_CANLF;sp|E2RGI3|RU1C_CANLF;tr|J9PAP5|J9PAP5_CANLF;tr|J9P5W0|J9P5W0_CANLF	tr|K9J6N9|K9J6N9_CANLF;sp|E2RGI3|RU1C_CANLF;tr|J9PAP5|J9PAP5_CANLF;tr|J9P5W0|J9P5W0_CANLF					4	4	4	30.7	30.7	30.7	13.742	0	249.69	42138000000	142	30.207	31.1544	31.028	30.4185	30.258	30.4463	30.3389	30.6533	30.443	30.4162	30.9219	30.1264
	0.026728	0.0138477	sp|E2RH47|RS3_CANLF	sp|E2RH47|RS3_CANLF					20	20	20	71.2	71.2	71.2	26.674	0	289.95	241620000000	525	33.3608	33.3367	33.0951	33.5006	32.7434	33.252	33.4433	33.1885	33.4436	32.6416	33.2876	32.6906
	0	-0.618721	tr|A0A0A0MPC2|A0A0A0MPC2_CANLF;sp|E2RK33|GATC_CANLF	tr|A0A0A0MPC2|A0A0A0MPC2_CANLF;sp|E2RK33|GATC_CANLF					4	4	4	49.3	49.3	49.3	15.32	0	41.597	4194700000	23	27.834	26.9291	27.4098	27.8374	27.5717	27.4064	NaN	NaN	NaN	NaN	28.1168	27.663
	0.0925475	0.0216582	tr|J9PAU6|J9PAU6_CANLF;sp|E2RKA8|RL32_CANLF;tr|J9P4R5|J9P4R5_CANLF;tr|J9NZA6|J9NZA6_CANLF;tr|J9NZ81|J9NZ81_CANLF;tr|J9NTK5|J9NTK5_CANLF;tr|E2R456|E2R456_CANLF;tr|J9NRY1|J9NRY1_CANLF;tr|E2R4E5|E2R4E5_CANLF	tr|J9PAU6|J9PAU6_CANLF;sp|E2RKA8|RL32_CANLF;tr|J9P4R5|J9P4R5_CANLF;tr|J9NZA6|J9NZA6_CANLF;tr|J9NZ81|J9NZ81_CANLF;tr|J9NTK5|J9NTK5_CANLF;tr|E2R456|E2R456_CANLF					6	6	6	27.4	27.4	27.4	15.79	0	83.588	59608000000	94	31.043	31.0993	31.3313	31.2295	31.0452	31.3401	31.2238	31.148	31.342	30.9316	31.1533	31.0162
	0.461787	-0.0558431	sp|E2RQ08|RPN1_CANLF	sp|E2RQ08|RPN1_CANLF					38	38	38	67.4	67.4	67.4	68.576	0	323.31	573590000000	1001	34.5781	34.7354	34.826	34.6034	34.7533	34.587	34.6328	34.7516	34.7122	34.7445	34.8408	34.6782
	0.172162	0.0405681	sp|E2RQ15|RAB25_CANLF	sp|E2RQ15|RAB25_CANLF					8	7	7	39	35.2	35.2	23.619	0	138.22	23878000000	120	30.1314	30.2	29.9342	29.9676	29.8773	29.8382	30.1358	29.93	29.9896	30.0106	29.6884	30.1638
	0.292454	-0.0718816	sp|E2RR58|RL12_CANLF;tr|A0A0A0MPE0|A0A0A0MPE0_CANLF;tr|F1PUJ6|F1PUJ6_CANLF;tr|F1PHL1|F1PHL1_CANLF;tr|J9NW89|J9NW89_CANLF;tr|F1PJT3|F1PJT3_CANLF	sp|E2RR58|RL12_CANLF;tr|A0A0A0MPE0|A0A0A0MPE0_CANLF					10	10	10	67.9	67.9	67.9	17.818	0	323.31	168900000000	254	32.638	32.9432	32.9994	32.7668	32.5328	32.6993	32.9754	32.8705	32.9526	32.5646	32.8126	32.6987
	1.10017	0.160028	tr|F1PAA4|F1PAA4_CANLF;sp|F1PAA9|CADH1_CANLF	tr|F1PAA4|F1PAA4_CANLF;sp|F1PAA9|CADH1_CANLF					26	26	23	40.9	40.9	37.7	91.483	0	323.31	162680000000	401	32.5893	32.6632	32.8142	32.7179	32.8304	32.9418	32.6542	32.4402	32.5233	32.569	32.8104	32.5941
	0.565375	0.303333	sp|F1PBJ0|RPGF2_CANLF;tr|J9P3V0|J9P3V0_CANLF;tr|L7N051|L7N051_CANLF;tr|F1Q422|F1Q422_CANLF	sp|F1PBJ0|RPGF2_CANLF					3	3	3	3.1	3.1	3.1	167.32	0	8.6718	706640000	14	NaN	NaN	25.0236	25.4415	25.701	25.4214	24.6341	25.1315	24.6636	25.44	25.5987	25.309
	0.46813	-0.0552208	sp|F1PCT7|RPN2_CANLF;tr|A0A1W2NCW3|A0A1W2NCW3_CANLF;tr|F1PBH2|F1PBH2_CANLF	sp|F1PCT7|RPN2_CANLF;tr|A0A1W2NCW3|A0A1W2NCW3_CANLF;tr|F1PBH2|F1PBH2_CANLF					24	24	24	51.3	51.3	51.3	69.033	0	323.31	253700000000	733	33.2642	33.5638	33.4779	33.4653	33.4096	33.538	33.4087	33.5345	33.5466	33.5667	33.4851	33.4433
	2.93074	-0.364806	sp|F1PJP5|STT3A_CANLF;tr|A0A1W2NC67|A0A1W2NC67_CANLF	sp|F1PJP5|STT3A_CANLF;tr|A0A1W2NC67|A0A1W2NC67_CANLF					20	20	19	28.1	28.1	27.1	80.578	0	131.72	83712000000	312	31.748	31.9142	31.7345	31.579	31.5761	31.8042	32.1503	31.912	32.0997	32.2512	32.0408	31.937
	0.255919	0.139865	sp|F1PTE3|RAB13_CANLF	sp|F1PTE3|RAB13_CANLF					8	7	7	37.9	32.5	32.5	22.667	0	74.007	10875000000	59	29.027	29.231	29.1477	28.8089	28.3816	28.2048	28.8784	28.6535	29.0555	28.3424	28.3718	28.6547
	0.457738	0.0716541	tr|G1K299|G1K299_CANLF;sp|O18835|BGLR_CANLF;tr|Q9XT64|Q9XT64_CANLF	tr|G1K299|G1K299_CANLF;sp|O18835|BGLR_CANLF					14	14	14	26.7	26.7	26.7	74.446	0	285.17	38306000000	236	30.8889	30.74	30.6934	30.9231	30.7503	30.9308	30.6114	30.9198	30.6703	30.6766	30.869	30.7093
	0.0698979	-0.0229946	sp|O18840|ACTB_CANLF;tr|J9NXE2|J9NXE2_CANLF;tr|Z4YHI2|Z4YHI2_CANLF;tr|J9P3P8|J9P3P8_CANLF	sp|O18840|ACTB_CANLF;tr|J9NXE2|J9NXE2_CANLF;tr|Z4YHI2|Z4YHI2_CANLF					32	32	1	95.2	95.2	4.5	41.736	0	323.31	2109700000000	6222	35.6304	35.8903	36.0994	36.3117	36.1877	36.2435	36.0856	35.9724	36.0908	36.095	36.1735	36.1249
	0.129691	0.0556079	sp|O46550|CAV2_CANLF;tr|F1PFX6|F1PFX6_CANLF	sp|O46550|CAV2_CANLF;tr|F1PFX6|F1PFX6_CANLF					6	6	6	51.9	51.9	51.9	17.931	0	121.96	40547000000	133	31.045	30.6977	30.9482	31.0413	31.0012	30.6747	30.2855	30.9108	30.7828	30.9934	31.2561	30.7954
	0.106398	-0.0189526	tr|B6CAN1|B6CAN1_CANLF;sp|O46674|AT2A2_CANLF;tr|J9P2B9|J9P2B9_CANLF;tr|E2RQY6|E2RQY6_CANLF;tr|Q8SPX2|Q8SPX2_CANLF	tr|B6CAN1|B6CAN1_CANLF;sp|O46674|AT2A2_CANLF					45	45	35	48.7	48.7	39.1	109.65	0	323.31	180670000000	733	33.2158	33.0437	32.9241	32.8576	32.9517	32.8411	33.0554	32.9125	33.007	33.0142	32.9675	33.0045
	0.660705	-0.104921	sp|O97492|CATA_CANLF;tr|J9NS62|J9NS62_CANLF;REV__tr|F1P7W3|F1P7W3_CANLF	sp|O97492|CATA_CANLF					31	31	31	64.1	64.1	64.1	59.797	0	323.31	411810000000	969	34.3515	34.1215	34.0365	33.8808	34.2226	34.0386	34.3342	34.2027	34.2035	34.1498	34.1773	34.0472
	0.522266	0.16618	tr|F1P8L7|F1P8L7_CANLF;sp|O97556|GDIB_CANLF	tr|F1P8L7|F1P8L7_CANLF;sp|O97556|GDIB_CANLF					23	23	18	57	57	44	48.803	0	323.31	45204000000	427	30.8653	31.0264	31.2399	30.9065	30.7667	30.7119	30.5303	31.2309	30.7534	30.442	30.8096	30.5179
	0.178954	-0.0957305	sp|O97578|CATC_CANLF;tr|F1PSK8|F1PSK8_CANLF;tr|J9P219|J9P219_CANLF;tr|J9NSE7|J9NSE7_CANLF	sp|O97578|CATC_CANLF;tr|F1PSK8|F1PSK8_CANLF;tr|J9P219|J9P219_CANLF					5	5	5	17.9	17.9	17.9	49.411	0	99.395	4741100000	36	27.4869	27.6696	27.7119	27.8227	27.9945	28.2386	NaN	NaN	NaN	28.0582	27.7746	27.9712
	0.250466	-0.056392	sp|O97758|ZO1_CANLF;tr|Q9GKN6|Q9GKN6_CANLF	sp|O97758|ZO1_CANLF					65	65	1	48	48	1.2	197.6	0	323.31	179490000000	936	33.0898	32.7707	32.8132	33.1169	33.0695	33.0297	32.9721	32.8545	32.9512	33.2119	33.2004	33.2346
	0.267109	-0.0485307	sp|P06583|AT1B1_CANLF;tr|J9P7J0|J9P7J0_CANLF;tr|F1PMF0|F1PMF0_CANLF	sp|P06583|AT1B1_CANLF;tr|J9P7J0|J9P7J0_CANLF;tr|F1PMF0|F1PMF0_CANLF					16	16	16	38.6	38.6	38.6	35.239	0	231.17	204730000000	323	33.3696	33.3937	33.2738	33.1731	32.9779	33.2302	33.3711	33.1509	33.2675	33.3039	33.3311	33.2761
	0.273879	0.171414	sp|P10463|CAYP1_CANLF;tr|G1K2D5|G1K2D5_CANLF	sp|P10463|CAYP1_CANLF;tr|G1K2D5|G1K2D5_CANLF					6	6	6	36	36	36	21.131	0	39.508	2927500000	32	26.9266	27.2502	27.4253	26.7073	26.2489	NaN	26.6407	27.0502	27.1852	26.4358	26.3892	NaN
	0.881301	0.368097	tr|J9P615|J9P615_CANLF;tr|F1PJ50|F1PJ50_CANLF;sp|P16255|SRP14_CANLF;tr|E2QS25|E2QS25_CANLF	tr|J9P615|J9P615_CANLF;tr|F1PJ50|F1PJ50_CANLF;sp|P16255|SRP14_CANLF;tr|E2QS25|E2QS25_CANLF					3	3	3	32.7	32.7	32.7	12.46	0	98.126	5618900000	48	27.189	28.0733	27.8653	28.0242	28.5391	28.0157	27.2863	27.6674	27.3491	27.7973	27.8149	27.9366
	2.90187	0.959328	sp|P16967|SSRA_CANLF;tr|A0A0A0MPC0|A0A0A0MPC0_CANLF	sp|P16967|SSRA_CANLF;tr|A0A0A0MPC0|A0A0A0MPC0_CANLF					4	4	4	21	21	21	31.976	0	141.78	23500000000	117	30.218	30.1699	30.338	30.5353	30.9839	30.5789	29.4772	29.0709	29.1959	29.8958	29.9168	29.7479
	0.67513	-0.414136	sp|P18066|RAB5A_CANLF	sp|P18066|RAB5A_CANLF					8	5	5	50.7	35.8	35.8	23.658	0	152.64	10096000000	58	29.2234	28.4605	28.163	28.7836	28.9912	29.5766	29.555	28.6999	NaN	29.5064	29.3608	29.2533
	0.22126	-0.0383219	sp|P18067|RAB7A_CANLF	sp|P18067|RAB7A_CANLF					16	16	16	69.6	69.6	69.6	23.52	0	323.31	190820000000	476	33.1602	33.0335	32.8328	33.0613	33.1437	33.0525	33.0474	32.9667	32.9965	33.1998	33.218	33.2242
	0.112296	-0.0503521	sp|P24408|RAB9A_CANLF;tr|E2RBU0|E2RBU0_CANLF	sp|P24408|RAB9A_CANLF					6	6	6	39.8	39.8	39.8	22.81	0	69.839	4852900000	59	27.9998	27.5773	27.4392	27.6139	27.8535	27.2225	27.9441	27.6786	27.9275	27.3088	27.4813	27.1985
	0.190304	-0.0470325	sp|P24643|CALX_CANLF	sp|P24643|CALX_CANLF					43	43	3	55.5	55.5	5.6	67.603	0	323.31	749390000000	1303	34.7967	34.9551	34.8542	34.7328	35.188	34.7238	34.8019	34.8789	34.7784	35.0525	35.099	35.0434
	1.60329	0.165286	sp|P25473|CLUS_CANLF;tr|E2QYU2|E2QYU2_CANLF	sp|P25473|CLUS_CANLF;tr|E2QYU2|E2QYU2_CANLF					17	17	16	35.1	35.1	32.4	51.789	0	323.31	73376000000	360	31.8074	31.7653	31.8889	31.5745	31.8746	31.7552	31.5496	31.659	31.6004	31.7305	31.5224	31.6969
	0.0420334	0.0274068	sp|P27799|S6A12_CANLF	sp|P27799|S6A12_CANLF					2	2	2	6.4	6.4	6.4	69.291	0	30.208	2303000000	28	27.0563	26.5999	27.4407	26.6246	26.4144	26.7433	27.1701	26.5206	27.2458	26.4579	26.5347	26.6029
	0.333654	-0.169163	sp|P31637|SC5A3_CANLF	sp|P31637|SC5A3_CANLF					5	5	5	12.7	12.7	12.7	79.545	0	33.231	4985500000	74	28.1029	27.9742	27.9774	27.5187	27.2511	27.5687	28.2373	28.3161	27.8902	27.3295	27.7336	27.8223
	0.0265559	-0.00863635	sp|P33724|CAV1_CANLF;tr|Q3HTT5|Q3HTT5_CANLF;tr|F1PWG1|F1PWG1_CANLF	sp|P33724|CAV1_CANLF					7	7	7	45.5	45.5	45.5	20.605	0	238.54	191250000000	285	32.724	33.2051	33.087	33.1285	32.9881	33.19	32.7672	33.1813	32.9824	33.2644	33.1168	32.9764
	0.608728	0.139896	sp|P33729|ICAM1_CANLF;tr|F1PB95|F1PB95_CANLF	sp|P33729|ICAM1_CANLF;tr|F1PB95|F1PB95_CANLF					8	8	8	21.4	21.4	21.4	57.951	0	107.92	14107000000	103	29.05	29.1642	29.1128	28.8261	29.1963	29.3162	28.7441	29.2937	28.8344	28.9938	28.9892	28.9502
	2.05334	-0.153769	sp|P33731|SRP72_CANLF	sp|P33731|SRP72_CANLF					23	23	23	45.6	45.6	45.6	74.493	0	323.31	35086000000	330	30.6052	30.4727	30.5896	30.4854	30.6758	30.5266	30.7119	30.7842	30.7651	30.7091	30.5947	30.6394
	0.720559	0.127056	tr|J9NXA9|J9NXA9_CANLF;sp|P38377|S61A1_CANLF;tr|F1PNM2|F1PNM2_CANLF;tr|F1PC79|F1PC79_CANLF	tr|J9NXA9|J9NXA9_CANLF;sp|P38377|S61A1_CANLF;tr|F1PNM2|F1PNM2_CANLF;tr|F1PC79|F1PC79_CANLF					11	11	11	29.4	29.4	29.4	51.867	0	199.89	114770000000	407	32.2302	32.0748	32.3054	32.4337	32.2221	32.4134	32.2311	32.0279	32.052	32.4065	32.0469	32.2562
	0.423927	-0.0869534	sp|P38400|GNAI2_CANLF	sp|P38400|GNAI2_CANLF					15	14	11	54.4	51.3	41.7	40.546	0	323.31	45450000000	303	31.1501	31.0475	31.0773	30.8389	31.1165	30.9629	31.0146	31.3858	31.0506	30.9019	31.243	30.7477
	0.282471	-0.0883695	tr|E5Q8W5|E5Q8W5_CANLF;sp|P38486|LEG3_CANLF;tr|F6PME1|F6PME1_CANLF	tr|E5Q8W5|E5Q8W5_CANLF;sp|P38486|LEG3_CANLF;tr|F6PME1|F6PME1_CANLF					17	17	17	42.2	42.2	42.2	29.505	0	323.31	795150000000	1100	35.3225	35.3434	35.2664	34.8433	34.8043	34.9364	35.1553	35.1743	35.1015	34.99	35.451	34.9596
	3.28212	-0.25696	tr|F1P8N6|F1P8N6_CANLF;sp|P41148|ENPL_CANLF;tr|A0A077KFB1|A0A077KFB1_CANLF	tr|F1P8N6|F1P8N6_CANLF;sp|P41148|ENPL_CANLF;tr|A0A077KFB1|A0A077KFB1_CANLF					54	54	52	54.5	54.5	52.8	92.384	0	323.31	689920000000	1845	34.7642	34.82	34.826	34.6383	34.7613	34.6294	34.8716	35.0001	35.0196	35.041	35.0519	35.0226
	1.28981	-0.142681	sp|P47240|PAX8_CANLF	sp|P47240|PAX8_CANLF					14	14	14	42.3	42.3	42.3	48.839	0	287.32	33544000000	185	30.5386	30.4391	30.5445	30.4781	30.3328	30.4227	30.5721	30.5452	30.5095	30.8305	30.5526	30.6795
	0.217406	-0.0428419	sp|P49256|LMAN2_CANLF;tr|J9P396|J9P396_CANLF	sp|P49256|LMAN2_CANLF;tr|J9P396|J9P396_CANLF					13	13	13	41.3	41.3	41.3	40.213	0	323.31	48466000000	178	31.1435	31.0877	30.9076	30.8001	30.8597	30.8464	31.1188	30.8781	31.0791	31.0003	30.842	31.0241
	0.0631504	-0.0255229	sp|P49819|DLDH_CANLF;tr|F1PAR0|F1PAR0_CANLF	sp|P49819|DLDH_CANLF;tr|F1PAR0|F1PAR0_CANLF					23	23	23	44.4	44.4	44.4	54.153	0	323.31	230780000000	874	33.1262	32.9499	33.1476	33.1848	33.6486	33.3588	33.1299	33.1701	32.9933	33.5845	33.4297	33.4763
	0.550366	-0.201733	sp|P51147|RAB5C_CANLF	sp|P51147|RAB5C_CANLF					9	6	6	48.1	33.3	33.3	23.455	0	225.54	32850000000	107	30.4721	30.8826	30.5428	30.041	30.3186	30.1199	30.6182	30.8021	30.9148	30.3325	30.3221	30.4147
	0.282382	0.0887171	sp|P51154|RB22A_CANLF	sp|P51154|RB22A_CANLF					4	4	1	28.9	28.9	10.8	21.724	0	116.7	9367600000	63	28.827	28.5082	28.0932	28.8066	28.6741	28.7587	28.5929	28.3585	28.4796	28.5546	28.6273	28.8382
	0.166499	0.150428	sp|P52206|GNA11_CANLF	sp|P52206|GNA11_CANLF					8	3	3	37.9	18.2	18.2	23.132	0	152.49	10284000000	44	30.1871	29.4012	29.4835	28.971	28.7043	29.0624	29.8538	29.4342	29.5629	28.5531	28.3517	28.5761
	0.146385	-0.106869	sp|P54714|TPIS_CANLF;tr|A0A0A0MPD0|A0A0A0MPD0_CANLF	sp|P54714|TPIS_CANLF;tr|A0A0A0MPD0|A0A0A0MPD0_CANLF					17	17	17	85.1	85.1	85.1	26.714	0	323.31	98998000000	380	32.2405	32.365	32.1993	31.8026	31.4573	31.7069	32.1409	32.5359	32.6777	31.3178	31.6719	31.4987
	2.7669	-0.475001	tr|F1PSG5|F1PSG5_CANLF;sp|P54832|PON2_CANLF	tr|F1PSG5|F1PSG5_CANLF;sp|P54832|PON2_CANLF					9	9	9	36.4	36.4	36.4	39.345	0	323.31	62720000000	217	31.5215	31.1746	31.4082	31.0317	31.1495	31.2597	31.9853	31.6855	31.6606	31.8128	31.5184	31.6255
	1.18726	0.437935	sp|P55745|RAB21_CANLF;tr|F1PGI1|F1PGI1_CANLF	sp|P55745|RAB21_CANLF;tr|F1PGI1|F1PGI1_CANLF					9	9	9	38.1	38.1	38.1	24.161	0	165.18	33206000000	151	30.3417	30.6798	30.4688	30.4008	30.6824	30.4782	29.4022	30.303	29.7094	30.5567	30.3821	30.4146
	0.0186912	0.00887203	sp|P60058|SC61G_CANLF	sp|P60058|SC61G_CANLF					2	2	2	36.8	36.8	36.8	7.7412	0	63.08	11958000000	70	28.9906	28.7935	NaN	28.9798	NaN	28.975	29.2123	29.0054	28.9973	NaN	28.4885	28.6856
	1.21554	-0.359834	sp|P60467|SC61B_CANLF	sp|P60467|SC61B_CANLF					3	3	3	37.5	37.5	37.5	9.9743	0	38.673	71277000000	112	32.0177	31.523	31.5901	32.1362	31.3288	32.0751	32.1482	32.2293	32.3617	31.9215	32.0309	31.9487
	2.46846	0.375754	sp|P60952|CDC42_CANLF;tr|J9P730|J9P730_CANLF;tr|J9NYK5|J9NYK5_CANLF;tr|J9NZN5|J9NZN5_CANLF;tr|F1PYF1|F1PYF1_CANLF	sp|P60952|CDC42_CANLF;tr|J9P730|J9P730_CANLF					9	8	8	48.2	42.4	42.4	21.258	0	70.555	54018000000	261	31.3201	31.3342	31.2276	31.4161	31.2513	31.7335	31.0056	31.1718	31.0456	30.901	30.8996	31.0881
	0.500375	-0.158361	sp|P61007|RAB8A_CANLF;tr|J9NWR1|J9NWR1_CANLF;tr|E2QSW2|E2QSW2_CANLF;tr|E2RC93|E2RC93_CANLF	sp|P61007|RAB8A_CANLF;tr|J9NWR1|J9NWR1_CANLF					9	7	7	42.5	30.9	30.9	23.668	0	283.7	35586000000	133	30.8028	30.5255	30.5488	30.9445	30.1815	30.8793	30.8853	30.8002	31.0696	30.5888	30.6832	30.9473
	0.0669853	-0.0505732	sp|P61008|SPCS3_CANLF;tr|F1PXY0|F1PXY0_CANLF	sp|P61008|SPCS3_CANLF;tr|F1PXY0|F1PXY0_CANLF					4	4	4	21.7	21.7	21.7	20.313	0	78.373	19172000000	47	30.3774	29.8988	30.0926	29.653	28.9182	29.4678	30.0593	29.9195	30.1026	29.253	29.5915	28.9799
	0.0890696	0.038271	sp|P61010|SRP54_CANLF	sp|P61010|SRP54_CANLF					12	12	12	27.2	27.2	27.2	55.704	0	273.63	15362000000	138	29.4275	28.9972	28.652	28.9948	29.4795	28.8384	29.0083	28.8848	28.9385	29.2573	29.0443	29.0879
	1.80125	0.255898	sp|P61017|RAB4B_CANLF;tr|J9PAQ4|J9PAQ4_CANLF;tr|A0A0A0MPB7|A0A0A0MPB7_CANLF	sp|P61017|RAB4B_CANLF;tr|J9PAQ4|J9PAQ4_CANLF;tr|A0A0A0MPB7|A0A0A0MPB7_CANLF					4	4	4	20.2	20.2	20.2	23.586	0	13.409	2718600000	41	26.9632	26.7983	26.9538	26.9763	27.1371	27.1359	26.8675	26.7069	26.8508	26.4774	26.7886	26.6115
	0.593907	-0.0966464	sp|P61105|RAB2A_CANLF;tr|G1K288|G1K288_CANLF;tr|J9NWA7|J9NWA7_CANLF;tr|Q6JDH7|Q6JDH7_CANLF	sp|P61105|RAB2A_CANLF;tr|G1K288|G1K288_CANLF;tr|J9NWA7|J9NWA7_CANLF					12	12	6	53.8	53.8	31.6	23.545	0	323.31	76328000000	183	31.5835	31.5021	31.6272	31.7767	31.6782	31.7764	31.7589	31.5845	31.6712	31.7566	31.9989	31.797
	0.0591538	0.0253681	sp|P61162|ACTZ_CANLF	sp|P61162|ACTZ_CANLF					8	8	5	35.9	35.9	25.3	42.613	0	306.3	20593000000	169	29.6057	29.3661	29.3731	29.9735	30.0841	30.0133	29.6928	29.6019	29.7262	29.8718	29.6604	30.2347
	0.934151	0.199651	sp|P62822|RAB1A_CANLF;tr|F1Q0H3|F1Q0H3_CANLF	sp|P62822|RAB1A_CANLF;tr|F1Q0H3|F1Q0H3_CANLF					14	13	8	61	55.6	38.5	22.677	0	323.31	152570000000	479	32.6022	32.8092	32.9005	32.922	33.1794	33.0269	32.4569	32.6239	32.7013	32.8219	32.9311	32.7665
	0.508583	-0.146472	sp|P62825|RAN_CANLF;tr|F1PR82|F1PR82_CANLF	sp|P62825|RAN_CANLF;tr|F1PR82|F1PR82_CANLF					14	14	14	53.2	53.2	53.2	24.423	0	283.61	181630000000	292	33.0702	32.9031	32.8996	33.0158	32.4391	32.8798	33.1012	33.2562	33.1641	32.8159	32.7347	32.8763
	0.170288	-0.0393063	sp|P62872|GBB1_CANLF;tr|F1P8Q5|F1P8Q5_CANLF;tr|A9UHL9|A9UHL9_CANLF;sp|P79147|GBB3_CANLF	sp|P62872|GBB1_CANLF					16	16	9	65.3	65.3	35	37.377	0	323.31	210590000000	590	33.259	33.5568	33.1346	33.1902	33.0995	33.1228	33.3959	33.2809	33.3633	33.1652	33.127	32.9983
	0.332843	-0.118395	sp|P62999|RAC1_CANLF;tr|F1P7Q4|F1P7Q4_CANLF;tr|F1PYQ1|F1PYQ1_CANLF;tr|E2RJH1|E2RJH1_CANLF;tr|F1PW88|F1PW88_CANLF	sp|P62999|RAC1_CANLF;tr|F1P7Q4|F1P7Q4_CANLF;tr|F1PYQ1|F1PYQ1_CANLF					11	11	10	50.5	50.5	44.8	21.45	0	143.13	107960000000	268	32.5041	32.1292	32.1155	31.5789	31.9105	31.9091	32.1497	32.4054	32.0741	32.1485	31.9372	32.2589
	0.642963	0.157835	sp|P63091|GNAS_CANLF;tr|F6Y6T1|F6Y6T1_CANLF;tr|J9P7G0|J9P7G0_CANLF;tr|B8ZXI2|B8ZXI2_CANLF;tr|F1PPQ4|F1PPQ4_CANLF	sp|P63091|GNAS_CANLF;tr|F6Y6T1|F6Y6T1_CANLF;tr|J9P7G0|J9P7G0_CANLF					16	16	15	49.5	49.5	46.7	45.664	0	230.23	69718000000	285	31.2484	31.7012	31.6044	31.3024	31.6131	31.2142	31.0249	31.4349	31.2283	31.2749	31.4843	31.1435
	0.198457	0.0868805	tr|F1PAJ4|F1PAJ4_CANLF;sp|P63273|RS17_CANLF;tr|A0A0A0MPE1|A0A0A0MPE1_CANLF;tr|J9P1I2|J9P1I2_CANLF;tr|J9NSG7|J9NSG7_CANLF;REV__tr|F1PIC2|F1PIC2_CANLF	tr|F1PAJ4|F1PAJ4_CANLF;sp|P63273|RS17_CANLF;tr|A0A0A0MPE1|A0A0A0MPE1_CANLF					11	11	11	66.4	66.4	66.4	15.393	0	323.31	74042000000	422	31.0032	31.3095	31.4847	32.0532	31.4954	31.6877	31.5166	31.399	31.5242	31.1066	31.5473	31.2868
	0.733885	0.371392	sp|P67811|SC11A_CANLF	sp|P67811|SC11A_CANLF					8	8	8	24.6	24.6	24.6	20.625	0	38.085	7779000000	138	28.0143	28.5463	28.2467	28.4821	28.7772	28.855	27.4648	28.4375	27.6077	28.5402	28.5275	28.6816
	0.602596	-0.120494	tr|F1PXX5|F1PXX5_CANLF;sp|P81999|DJB11_CANLF;tr|J9P8A9|J9P8A9_CANLF	tr|F1PXX5|F1PXX5_CANLF;sp|P81999|DJB11_CANLF;tr|J9P8A9|J9P8A9_CANLF					14	14	14	39.7	39.7	39.7	40.55	0	323.31	92814000000	333	32.0882	31.8305	31.6866	31.7537	31.981	31.6347	32.1524	31.9615	31.978	31.8978	31.7584	31.666
	0.50689	-0.343774	sp|P83362|SPCS1_CANLF;tr|F6V6C9|F6V6C9_CANLF	sp|P83362|SPCS1_CANLF;tr|F6V6C9|F6V6C9_CANLF					3	3	3	82.1	82.1	82.1	4.4571	0	49.739	13938000000	83	28.9884	29.1249	29.252	28.7165	29.2556	27.6299	28.7114	29.1614	29.0179	29.1962	29.7713	28.8375
	0.0877917	-0.0594231	tr|V5LJS9|V5LJS9_CANLF;tr|V5LJC8|V5LJC8_CANLF;tr|Q49S02|Q49S02_CANLF;tr|Q49RS4|Q49RS4_CANLF;tr|Q1HKI1|Q1HKI1_CANLF;tr|Q1HKG8|Q1HKG8_CANLF;tr|H8Y5B7|H8Y5B7_CANLF;tr|H8Y3T5|H8Y3T5_CANLF;tr|H8Y3P6|H8Y3P6_CANLF;tr|H8Y365|H8Y365_CANLF;tr|H8Y352|H8Y352_CANLF;tr|H8Y2W1|H8Y2W1_CANLF;tr|H8Y2J4|H8Y2J4_CANLF;tr|H8Y277|H8Y277_CANLF;tr|C4MVX4|C4MVX4_CANLF;tr|C4MUT4|C4MUT4_CANLF;tr|C4MT75|C4MT75_CANLF;tr|C4MT6…	tr|V5LJS9|V5LJS9_CANLF;tr|V5LJC8|V5LJC8_CANLF;tr|Q49S02|Q49S02_CANLF;tr|Q49RS4|Q49RS4_CANLF;tr|Q1HKI1|Q1HKI1_CANLF;tr|Q1HKG8|Q1HKG8_CANLF;tr|H8Y5B7|H8Y5B7_CANLF;tr|H8Y3T5|H8Y3T5_CANLF;tr|H8Y3P6|H8Y3P6_CANLF;tr|H8Y365|H8Y365_CANLF;tr|H8Y352|H8Y352_CANLF;tr|H8Y2W1|H8Y2W1_CANLF;tr|H8Y2J4|H8Y2J4_CANLF;tr|H8Y277|H8Y277_CANLF;tr|C4MVX4|C4MVX4_CANLF;tr|C4MUT4|C4MUT4_CANLF;tr|C4MT75|C4MT75_CANLF;tr|C4MT6…					4	4	4	11.3	11.3	11.3	35.952	0	24.213	2836500000	63	NaN	26.315	26.697	26.7079	27.4962	26.7317	26.2567	27.1647	26.8433	27.0115	26.9688	26.9669
	0.253092	-0.0702569	tr|F1PI42|F1PI42_CANLF;sp|Q00004|SRP68_CANLF	tr|F1PI42|F1PI42_CANLF;sp|Q00004|SRP68_CANLF					26	26	26	49	49	49	70.046	0	323.31	35594000000	299	30.6115	30.5307	30.5708	30.5042	30.4663	30.5966	30.8192	30.6272	30.8202	30.6768	30.1413	30.4965
	0.0883534	-0.059187	sp|Q00589|SC6A6_CANLF	sp|Q00589|SC6A6_CANLF					5	5	5	9.4	9.4	9.4	69.728	0	28.063	16229000000	93	29.9164	29.8755	29.3779	28.9015	29.4044	29.6427	29.8622	29.7356	28.8155	29.8851	29.5961	29.5642
	1.01779	0.795787	tr|F1PX23|F1PX23_CANLF;sp|Q01685|TRAM1_CANLF	tr|F1PX23|F1PX23_CANLF;sp|Q01685|TRAM1_CANLF					2	2	2	7.1	7.1	7.1	40.767	0	33.433	5567900000	45	28.512	27.9493	28.6879	NaN	27.4526	NaN	26.758	27.4019	27.131	NaN	28.1277	26.5536
	0.661484	0.154375	sp|Q05052|OST48_CANLF;tr|F1PVU1|F1PVU1_CANLF	sp|Q05052|OST48_CANLF;tr|F1PVU1|F1PVU1_CANLF					13	13	13	43.4	43.4	43.4	49.634	0	323.31	75946000000	302	31.5135	31.9277	31.7948	31.7343	31.8121	31.9333	31.2198	31.7114	31.712	31.7531	31.7615	31.7247
	0.488703	-0.107804	tr|J9P2E3|J9P2E3_CANLF;sp|Q0X0E5|NB5R3_CANLF;tr|F1PS26|F1PS26_CANLF	tr|J9P2E3|J9P2E3_CANLF;sp|Q0X0E5|NB5R3_CANLF;tr|F1PS26|F1PS26_CANLF					21	21	21	79.5	79.5	79.5	33.851	0	323.31	182300000000	745	32.7067	32.7286	32.8007	32.6818	33.0283	32.6323	32.6769	32.8612	32.7108	33.1819	32.9235	32.7999
	0.285505	0.123635	sp|Q28250|SPCS2_CANLF	sp|Q28250|SPCS2_CANLF					12	12	12	50.9	50.9	50.9	24.941	0	323.31	31400000000	196	30.2225	30.7464	30.5988	30.325	30.6989	30.2317	29.8795	30.3796	30.2194	30.3529	30.9032	30.2912
	1.38911	-0.388077	tr|E2R3X4|E2R3X4_CANLF;sp|Q28269|OCLN_CANLF;tr|F1PZF7|F1PZF7_CANLF;tr|Q9N0W3|Q9N0W3_CANLF;tr|J9P475|J9P475_CANLF	tr|E2R3X4|E2R3X4_CANLF;sp|Q28269|OCLN_CANLF;tr|F1PZF7|F1PZF7_CANLF;tr|Q9N0W3|Q9N0W3_CANLF;tr|J9P475|J9P475_CANLF					9	9	9	21.9	21.9	21.9	59.16	0	186.26	16164000000	161	29.7628	29.6158	29.4899	29.5152	29.0022	29.3197	30.0736	29.6274	30.0887	29.4776	29.9279	29.7394
	0.840086	0.170736	sp|Q28288|STXB2_CANLF	sp|Q28288|STXB2_CANLF					26	26	26	53.8	53.8	53.8	66.499	0	323.31	37021000000	319	31.0984	30.6612	30.6552	30.7955	30.5999	30.7235	30.8618	30.5318	30.6265	30.4382	30.4662	30.4429
	0.101902	0.0738845	sp|Q28294|GNAQ_CANLF;tr|F1PDS3|F1PDS3_CANLF;tr|F1PXM5|F1PXM5_CANLF	sp|Q28294|GNAQ_CANLF;tr|F1PDS3|F1PDS3_CANLF;tr|F1PXM5|F1PXM5_CANLF					11	9	9	36.8	31.5	31.5	42.142	0	79.654	13183000000	108	29.8911	28.9742	29.3795	29.5072	28.6336	29.2243	29.8421	29.2784	29.2975	28.6025	28.9516	28.9271
	0.000465519	0.000369263	tr|G1K2B9|G1K2B9_CANLF;tr|F5XVB0|F5XVB0_CANLF;tr|A0A219Y8W3|A0A219Y8W3_CANLF;sp|Q28295|VWF_CANLF	tr|G1K2B9|G1K2B9_CANLF;tr|F5XVB0|F5XVB0_CANLF;tr|A0A219Y8W3|A0A219Y8W3_CANLF;sp|Q28295|VWF_CANLF					2	2	2	1.2	1.2	1.2	309.7	0.0071895	1.9555	5170100000	39	26.5745	27.4305	27.9364	26.7252	27.2295	26.9707	26.6438	27.3882	26.895	27.4663	27.3271	27.6043
	0.706595	-0.0801121	sp|Q28298|RRBP1_CANLF;tr|E2RL02|E2RL02_CANLF;tr|E2RAB2|E2RAB2_CANLF	sp|Q28298|RRBP1_CANLF;tr|E2RL02|E2RL02_CANLF;tr|E2RAB2|E2RAB2_CANLF					83	83	83	65.5	65.5	65.5	164.58	0	323.31	341400000000	1534	33.8817	33.8739	33.7653	34.1149	33.8942	33.9903	34.0054	33.935	33.9914	33.995	34.074	34.033
	0.109284	0.0941675	sp|Q28895|NPC2_CANLF;tr|F1PAR9|F1PAR9_CANLF	sp|Q28895|NPC2_CANLF;tr|F1PAR9|F1PAR9_CANLF					9	9	9	50.3	50.3	50.3	16.056	0	83.797	41011000000	138	30.6546	29.7892	29.9091	31.3328	30.9014	31.2439	30.2943	30.2234	30.45	30.8605	30.8935	30.962
	1.01801	-0.310802	tr|F1PZS9|F1PZS9_CANLF;sp|Q29467|I5P1_CANLF	tr|F1PZS9|F1PZS9_CANLF;sp|Q29467|I5P1_CANLF					7	7	7	21.4	21.4	21.4	42.381	0	10.993	2727200000	24	27.6648	27.2486	27.3283	27.1564	NaN	NaN	27.492	27.6826	27.8064	NaN	NaN	NaN
	0.994977	0.25936	tr|J9P497|J9P497_CANLF;sp|Q29471|ANX13_CANLF	tr|J9P497|J9P497_CANLF;sp|Q29471|ANX13_CANLF					26	26	26	75.6	75.6	75.6	35.461	0	323.31	396960000000	1070	33.8819	34.282	34.2032	34.0797	34.0677	34.0254	33.3944	33.767	33.7877	33.9374	34.2665	33.5816
	0.325297	0.0905938	sp|Q29476|ST1A1_CANLF;tr|Q7JJ60|Q7JJ60_CANLF	sp|Q29476|ST1A1_CANLF					11	11	11	56.3	56.3	56.3	34.115	0	78.034	14225000000	164	29.2209	29.1091	29.2236	29.2827	28.9106	28.7366	29.076	29.2138	29.038	28.7561	28.8661	28.6641
	0.53524	0.530802	tr|F1PBL3|F1PBL3_CANLF;sp|Q2PQH8|GDE_CANLF	tr|F1PBL3|F1PBL3_CANLF;sp|Q2PQH8|GDE_CANLF					11	11	11	11.9	11.9	11.9	174.8	0	39.174	1690700000	31	NaN	NaN	NaN	26.7389	27.4823	26.4506	NaN	NaN	NaN	26.5265	26.1931	27.1133
	0.303427	0.089861	sp|Q2THW9|ZDHC5_CANLF;tr|G1K291|G1K291_CANLF	sp|Q2THW9|ZDHC5_CANLF;tr|G1K291|G1K291_CANLF					13	13	13	31.2	31.2	31.2	77.384	0	323.31	16397000000	141	29.8678	29.6788	29.6174	29.7931	29.4363	29.5864	29.7878	29.5172	29.8901	29.2479	29.4243	29.1523
	0.420892	-0.167607	sp|Q2TLZ1|MACOI_CANLF;tr|G1K2B0|G1K2B0_CANLF	sp|Q2TLZ1|MACOI_CANLF;tr|G1K2B0|G1K2B0_CANLF					8	8	8	13.6	13.6	13.6	76.177	0	37.92	4210600000	36	27.5184	27.3503	27.4143	27.8829	26.9836	27.7127	27.3765	27.9091	27.992	27.4753	27.4703	27.3271
	0.13205	0.129955	sp|Q32KH5|GALNS_CANLF;tr|F1PHF0|F1PHF0_CANLF	sp|Q32KH5|GALNS_CANLF;tr|F1PHF0|F1PHF0_CANLF					4	4	4	11.1	11.1	11.1	57.999	0	13.596	3610700000	41	27.0084	26.5353	NaN	27.8615	28.5492	27.5599	27.1567	27.1589	27.1219	27.6232	27.8038	27.9291
	0.267018	0.11664	tr|A0A0A0MPD1|A0A0A0MPD1_CANLF;tr|E2R0S2|E2R0S2_CANLF;sp|Q38JA7|KDM5C_CANLF;sp|Q30DN6|KDM5D_CANLF;tr|S5U8I1|S5U8I1_CANLF	tr|A0A0A0MPD1|A0A0A0MPD1_CANLF;tr|E2R0S2|E2R0S2_CANLF;sp|Q38JA7|KDM5C_CANLF					15	15	14	16	16	15.4	168.92	0	47.519	4017100000	75	NaN	27.6768	27.494	27.2701	26.8922	27.3634	27.1679	27.4817	27.276	27.4233	26.7642	27.0474
	0.0917411	-0.0421424	sp|Q3YIX4|PEBP1_CANLF;tr|F1P699|F1P699_CANLF	sp|Q3YIX4|PEBP1_CANLF;tr|F1P699|F1P699_CANLF					12	12	12	69.5	69.5	69.5	20.921	0	323.31	103340000000	205	32.335	32.3518	32.0324	32.2285	31.6076	32.034	32.1484	32.3737	32.4531	31.7752	31.9516	31.8791
	0.124899	-0.0978252	sp|Q3ZKN1|CATK_CANLF;tr|G1K2A7|G1K2A7_CANLF	sp|Q3ZKN1|CATK_CANLF;tr|G1K2A7|G1K2A7_CANLF					7	7	7	36.7	36.7	36.7	37.061	0	53.518	8656600000	42	28.5315	27.5198	27.9411	29.1779	28.7455	29.0865	28.7621	28.5615	28.5943	28.4958	28.5773	28.9026
	0.344213	0.151744	sp|Q4LAL9|CATD_CANLF	sp|Q4LAL9|CATD_CANLF					18	18	18	48	48	48	44.32	0	323.31	556800000000	1052	33.967	34.0819	34.3803	34.514	34.7846	34.7043	33.9538	34.0335	34.1685	34.4039	34.7083	34.6557
	0.022014	0.0174042	sp|Q50KA9|NDKA_CANLF;tr|J9P9D9|J9P9D9_CANLF;tr|J9NWI3|J9NWI3_CANLF	sp|Q50KA9|NDKA_CANLF					6	3	2	44.1	19.1	19.1	17.18	0	44.448	10849000000	51	28.3869	29.5187	29.3954	28.9689	29.3697	29.0805	28.2604	29.2527	29.5028	29.3841	29.1129	28.7962
	0.386032	-0.12811	tr|F1PID4|F1PID4_CANLF;tr|J9P7C6|J9P7C6_CANLF;sp|Q52S86|PODXL_CANLF	tr|F1PID4|F1PID4_CANLF;tr|J9P7C6|J9P7C6_CANLF;sp|Q52S86|PODXL_CANLF					21	21	21	35.2	35.2	35.2	57.268	0	323.31	223110000000	583	32.9636	32.935	33.305	33.0622	33.5321	33.1308	33.208	33.1637	32.939	33.5344	33.5693	33.246
	0.0315132	0.0124626	sp|Q5JZQ9|CLN5_CANLF	sp|Q5JZQ9|CLN5_CANLF					7	7	7	22.3	22.3	22.3	40.389	0	29.451	10485000000	88	29.2144	28.7918	28.5292	29.1735	28.7258	28.7801	29.0819	28.7433	28.8105	28.6869	28.9607	29.0912
	0.25086	0.233895	sp|Q5NDE9|PMGT2_CANLF;tr|J9PBF0|J9PBF0_CANLF	sp|Q5NDE9|PMGT2_CANLF;tr|J9PBF0|J9PBF0_CANLF					5	5	5	14	14	14	65.995	0	19.896	709300000	38	NaN	24.674	25.4357	25.5256	NaN	25.814	NaN	24.5509	NaN	25.3862	25.4483	NaN
	0.20351	-0.098886	tr|F1PDX2|F1PDX2_CANLF;sp|Q5PU49|KPCD_CANLF;tr|E2RNP2|E2RNP2_CANLF	tr|F1PDX2|F1PDX2_CANLF;sp|Q5PU49|KPCD_CANLF					8	8	8	17.3	17.3	17.3	77.097	0	101.59	3857100000	48	27.8848	27.14	26.8641	27.5534	27.4143	27.9155	27.6442	27.7427	27.5706	27.4877	27.3594	27.3145
	1.23649	0.618128	tr|F1PRZ2|F1PRZ2_CANLF;sp|Q5TJE1|DAXX_CANLF	tr|F1PRZ2|F1PRZ2_CANLF;sp|Q5TJE1|DAXX_CANLF					6	6	6	11.7	11.7	11.7	81.22	0	152.39	3330400000	29	27.91	27.6481	27.1004	27.022	27.8994	27.1048	NaN	27.1291	26.8053	26.5537	NaN	NaN
	0.369597	0.147578	sp|Q5TJE4|TPSN_CANLF	sp|Q5TJE4|TPSN_CANLF					7	7	7	25.6	25.6	25.6	47.773	0	49.797	16868000000	206	29.5406	29.0885	29.8754	29.8149	30.1467	29.928	29.7658	29.5357	29.5933	29.6536	29.3755	29.3571
	0.122121	0.0490705	sp|Q5TJE7|WDR46_CANLF;tr|F1PS20|F1PS20_CANLF	sp|Q5TJE7|WDR46_CANLF;tr|F1PS20|F1PS20_CANLF					12	12	12	28.1	28.1	28.1	68.816	0	316.36	19706000000	163	30.3004	29.9037	29.8941	29.8433	29.7198	29.8094	30.2789	29.8697	30.0204	29.561	29.5837	29.3034
	0.820049	-0.170496	sp|Q5TJE9|RS18_CANLF;tr|Q9XSU5|Q9XSU5_CANLF	sp|Q5TJE9|RS18_CANLF					16	16	16	65.8	65.8	65.8	17.718	0	135.45	126610000000	316	32.2377	32.2704	32.2044	32.6703	32.0582	32.5023	32.523	32.5096	32.4992	32.3269	32.6132	32.2218
	0.111569	0.106442	tr|Q5TJF1|Q5TJF1_CANLF;sp|Q5TJF0|VPS52_CANLF	tr|Q5TJF1|Q5TJF1_CANLF;sp|Q5TJF0|VPS52_CANLF					7	7	7	16.8	16.8	16.8	79.021	0	42.629	4169300000	61	NaN	26.6259	27.1857	27.6353	27.8508	27.4642	26.6772	26.5878	27.2367	28.1267	27.6013	28.2585
	0.356434	-0.102819	sp|Q5TJF3|RING1_CANLF	sp|Q5TJF3|RING1_CANLF					12	12	10	49	49	41.6	42.47	0	323.31	30949000000	246	30.5011	30.3045	30.6749	30.6317	30.5308	30.6771	30.7734	30.7619	30.994	30.3869	30.3647	30.3986
	2.77877	0.348537	tr|F1PUF1|F1PUF1_CANLF;sp|Q5TJF5|DHB8_CANLF	tr|F1PUF1|F1PUF1_CANLF;sp|Q5TJF5|DHB8_CANLF					8	8	8	46.7	46.7	46.7	26.695	0	323.31	44505000000	182	30.7784	30.9146	31.0003	31.059	31.0264	31.0652	30.5562	30.5941	30.4945	30.886	30.5965	30.8263
	0.509712	0.361764	sp|Q5TJF6|S39A7_CANLF;tr|G1K274|G1K274_CANLF	sp|Q5TJF6|S39A7_CANLF;tr|G1K274|G1K274_CANLF					5	5	5	10	10	10	49.915	0	41.099	4205300000	36	NaN	NaN	27.2337	28.1587	28.4056	28.2585	NaN	27.5176	NaN	27.6636	27.7759	27.6987
	0.148217	-0.0567922	sp|Q5TJG6|BRD2_CANLF	sp|Q5TJG6|BRD2_CANLF					13	11	11	23.9	21.2	21.2	88.271	0	174.83	7733200000	57	28.101	28.5024	28.5723	28.3109	28.0785	28.37	28.3645	28.6203	28.7092	28.02	28.1826	28.4378
	0.00816861	0.00508283	tr|F1Q2P1|F1Q2P1_CANLF;sp|Q5VK71|AKAP8_CANLF;tr|J9P7K5|J9P7K5_CANLF	tr|F1Q2P1|F1Q2P1_CANLF;sp|Q5VK71|AKAP8_CANLF					14	14	14	25.9	25.9	25.9	76.828	0	243.35	14938000000	136	30.0852	29.6696	29.1102	29.4495	29.0262	29.2756	29.8285	29.4652	29.5394	29.1022	29.2196	29.1147
	0.680343	0.362828	sp|Q5WR09|VATG1_CANLF	sp|Q5WR09|VATG1_CANLF					3	3	3	14.4	14.4	14.4	13.592	0	323.31	12134000000	48	29.1619	28.8817	29.0235	29.6806	30.0368	29.6998	28.7509	28.7256	28.779	29.3436	29.6568	29.6483
	0.545081	0.155938	sp|Q5WR10|DX39B_CANLF;tr|K9J6N8|K9J6N8_CANLF	sp|Q5WR10|DX39B_CANLF;tr|K9J6N8|K9J6N8_CANLF					31	31	14	69.6	69.6	39.5	49.021	0	323.31	393080000000	954	33.979	34.2716	34.3612	33.5478	33.8454	33.8311	33.8131	33.7597	33.8209	33.8487	33.8414	33.5781
	0.14112	-0.0505692	sp|Q6F3J0|NFKB1_CANLF;tr|A0A0A0MPC3|A0A0A0MPC3_CANLF;tr|A1XFH3|A1XFH3_CANLF	sp|Q6F3J0|NFKB1_CANLF;tr|A0A0A0MPC3|A0A0A0MPC3_CANLF					6	6	6	10.4	10.4	10.4	105.63	0	41.82	2933900000	32	27.2316	NaN	27.1553	26.9739	27.22	27.3765	27.0039	27.1738	27.0402	27.3207	27.6715	27.3634
	0.0420742	0.0108213	sp|Q6Q7P4|41_CANLF;tr|J9P7E1|J9P7E1_CANLF;tr|G1K2A4|G1K2A4_CANLF	sp|Q6Q7P4|41_CANLF;tr|J9P7E1|J9P7E1_CANLF;tr|G1K2A4|G1K2A4_CANLF					25	25	18	34.3	34.3	23.6	90.687	0	323.31	60220000000	338	31.7605	31.5074	31.5238	31.2813	31.3193	31.2546	31.5075	31.3468	31.4485	31.4146	31.4342	31.3537
	0.14801	-0.0552853	tr|F1PHD2|F1PHD2_CANLF;sp|Q6RH31|PSN1_CANLF;tr|Q56JJ5|Q56JJ5_CANLF;tr|M1VRQ9|M1VRQ9_CANLF	tr|F1PHD2|F1PHD2_CANLF;sp|Q6RH31|PSN1_CANLF;tr|Q56JJ5|Q56JJ5_CANLF					6	6	5	19.5	19.5	17.6	52.45	0	210.53	16403000000	72	30.1564	29.7014	29.4569	29.6793	29.3068	29.4723	29.7173	29.8391	29.5929	29.7613	29.51	29.9081
	0.235906	0.0605671	sp|Q6TEQ7|ANXA2_CANLF;tr|E2RKW9|E2RKW9_CANLF;tr|J9PAF9|J9PAF9_CANLF;tr|J9P1X3|J9P1X3_CANLF	sp|Q6TEQ7|ANXA2_CANLF					32	32	32	79.1	79.1	79.1	38.654	0	323.31	782580000000	860	34.8956	35.4449	35.1677	34.9732	34.8533	35.0859	35.0476	34.8643	34.9592	35.0917	35.0847	34.8699
	1.02359	-0.211343	tr|F1P9H1|F1P9H1_CANLF;tr|F1PRX6|F1PRX6_CANLF;sp|Q6UR05|MRP1_CANLF	tr|F1P9H1|F1P9H1_CANLF;tr|F1PRX6|F1PRX6_CANLF;sp|Q6UR05|MRP1_CANLF					10	8	8	10.2	9.2	9.2	170.44	0	24.563	4756600000	64	27.8965	27.6086	27.6758	27.6429	27.7614	27.2899	27.7414	27.9963	28.074	27.7189	27.7554	27.5985
	0.279742	-0.149133	tr|G1K277|G1K277_CANLF;sp|Q6URC2|HMGA1_CANLF;tr|Q2TUW3|Q2TUW3_CANLF;tr|D5FGP6|D5FGP6_CANLF	tr|G1K277|G1K277_CANLF;sp|Q6URC2|HMGA1_CANLF;tr|Q2TUW3|Q2TUW3_CANLF					9	9	3	60.6	60.6	24	11.328	0	322.83	120290000000	338	32.7403	32.7778	32.9261	31.8382	32.1989	32.0213	32.4959	32.7018	32.8958	32.4248	32.3129	32.3244
	0.725431	-0.163119	sp|Q6YKA4|HMGB1_CANLF;tr|J9P699|J9P699_CANLF	sp|Q6YKA4|HMGB1_CANLF;tr|J9P699|J9P699_CANLF					11	11	10	39.1	39.1	34.9	24.893	0	323.31	103460000000	349	31.4064	31.6526	31.7346	31.4615	31.7892	31.3299	31.4338	31.8467	31.7194	31.6934	31.934	31.5927
	1.88809	-0.522219	sp|Q711A6|HMGN2_CANLF;tr|J9P1T0|J9P1T0_CANLF;tr|F1Q3Z0|F1Q3Z0_CANLF;tr|J9NXG1|J9NXG1_CANLF;tr|J9P380|J9P380_CANLF;tr|J9NTW4|J9NTW4_CANLF	sp|Q711A6|HMGN2_CANLF;tr|J9P1T0|J9P1T0_CANLF					11	11	7	61.1	61.1	53.3	9.3785	0	261.43	50296000000	144	30.937	30.3533	30.6368	30.9161	31.3573	30.6344	31.4902	31.0834	31.4538	31.3399	31.2729	31.9997
	0.00943978	0.00311006	sp|Q75ZY9|MET_CANLF;tr|J9P743|J9P743_CANLF;tr|Z4YHE9|Z4YHE9_CANLF;tr|Q8I007|Q8I007_CANLF	sp|Q75ZY9|MET_CANLF;tr|J9P743|J9P743_CANLF;tr|Z4YHE9|Z4YHE9_CANLF					17	17	17	20.2	20.2	20.2	154.64	0	222.01	17646000000	233	29.953	29.5077	29.7731	29.7699	29.8543	29.6132	29.9286	29.8829	29.8194	29.4048	29.6747	29.1698
	0.0669218	0.0217761	sp|Q7YQC6|HSP71_CANLF;tr|G1K268|G1K268_CANLF;tr|G1K267|G1K267_CANLF;tr|O77483|O77483_CANLF	sp|Q7YQC6|HSP71_CANLF;tr|G1K268|G1K268_CANLF;tr|G1K267|G1K267_CANLF					38	32	22	65.1	59.9	40.7	70.069	0	323.31	164920000000	609	32.6082	32.3367	32.3685	32.9325	32.6344	32.853	32.6282	32.4908	32.5956	32.7601	32.5276	32.8155
	0.111888	-0.0596123	tr|F1PVY2|F1PVY2_CANLF;sp|Q7YRF1|AP3B1_CANLF	tr|F1PVY2|F1PVY2_CANLF;sp|Q7YRF1|AP3B1_CANLF					11	11	11	13.5	13.5	13.5	121.09	0	180.36	9710800000	127	28.1574	28.3047	28.5148	28.5381	28.6055	28.9432	28.0437	28.5076	28.4318	29.1027	28.7654	29.1858
	0.974782	0.529321	sp|Q863Z4|MTPN_CANLF	sp|Q863Z4|MTPN_CANLF					3	3	3	33.9	33.9	33.9	12.895	0	234.75	8670400000	28	28.5252	29.2691	28.0121	28.458	27.9025	28.4575	28.1082	28.5364	27.9411	27.1975	27.7572	27.2759
	0.0626561	-0.0801668	tr|J9P9W4|J9P9W4_CANLF;tr|F1Q453|F1Q453_CANLF;sp|Q865S0|RCAS1_CANLF	tr|J9P9W4|J9P9W4_CANLF;tr|F1Q453|F1Q453_CANLF;sp|Q865S0|RCAS1_CANLF					3	3	3	21	21	21	21.129	0	188.84	3844300000	26	27.5611	NaN	NaN	28.3993	27.0681	27.6479	NaN	27.4777	NaN	NaN	28.0209	27.8183
	0.858336	-0.44177	tr|F1PBF2|F1PBF2_CANLF;sp|Q865S3|ARHG2_CANLF;tr|J9JHP5|J9JHP5_CANLF	tr|F1PBF2|F1PBF2_CANLF;sp|Q865S3|ARHG2_CANLF;tr|J9JHP5|J9JHP5_CANLF					10	10	10	13.7	13.7	13.7	111.25	0	20.539	3036900000	30	NaN	27.0416	26.9031	26.5525	27.3056	NaN	NaN	NaN	NaN	27.4642	27.3207	27.7249
	0.0899947	-0.0545056	sp|Q8HY81|CATS_CANLF;tr|F1PAK0|F1PAK0_CANLF	sp|Q8HY81|CATS_CANLF;tr|F1PAK0|F1PAK0_CANLF					8	8	8	25.1	25.1	25.1	37.228	0	152	16598000000	119	29.4508	29.2933	29.3953	30.0101	29.7189	29.9783	29.3512	29.4532	29.3398	30.2163	30.1176	30.175
	0.0105197	0.00973905	tr|F1PAP1|F1PAP1_CANLF;sp|Q8HYS5|MCL1_CANLF;tr|J9PBC4|J9PBC4_CANLF	tr|F1PAP1|F1PAP1_CANLF;sp|Q8HYS5|MCL1_CANLF;tr|J9PBC4|J9PBC4_CANLF					4	4	4	14.3	14.3	14.3	36.735	0	59.323	3065700000	70	25.731	27.0112	27.2355	27.494	27.5904	27.4364	27.0957	26.9928	26.9535	27.1986	27.126	27.4702
	0.69891	0.177254	sp|Q8HZM5|GLNA_CANLF;tr|A0A0A0MPE2|A0A0A0MPE2_CANLF;tr|J9JHG3|J9JHG3_CANLF	sp|Q8HZM5|GLNA_CANLF;tr|A0A0A0MPE2|A0A0A0MPE2_CANLF;tr|J9JHG3|J9JHG3_CANLF					6	6	6	21.7	21.7	21.7	42.028	0	164.49	6200700000	42	27.6019	28.0837	28.1307	28.2775	27.9751	28.1355	27.8959	28.097	27.9375	27.7009	27.6527	28.1495
	0.134188	0.0796912	sp|Q8MJ44|KAPCA_CANLF;tr|F1PAT6|F1PAT6_CANLF;tr|J9NXT4|J9NXT4_CANLF	sp|Q8MJ44|KAPCA_CANLF;tr|F1PAT6|F1PAT6_CANLF;tr|J9NXT4|J9NXT4_CANLF					12	12	6	33.4	33.4	17.7	40.545	0	82.564	15970000000	126	28.8571	29.2573	28.9652	28.6462	29.5289	29.2561	28.7443	28.5591	28.8098	29.602	29.312	29.3107
	0.540918	-0.19395	sp|Q8MJ47|PP1B_CANLF;tr|F1P7S9|F1P7S9_CANLF	sp|Q8MJ47|PP1B_CANLF;tr|F1P7S9|F1P7S9_CANLF					19	7	7	61.5	30	30	37.186	0	224.66	40986000000	163	30.7708	31.0408	30.6993	30.6904	29.9288	30.5029	30.7772	30.7125	30.9177	30.7937	30.7961	30.7885
	0.519946	0.270424	sp|Q8WMS0|S35A2_CANLF;tr|F1P8L8|F1P8L8_CANLF;tr|D6CJH8|D6CJH8_CANLF;tr|Q3LAG3|Q3LAG3_CANLF;tr|Q3LA82|Q3LA82_CANLF;tr|F1PVQ2|F1PVQ2_CANLF	sp|Q8WMS0|S35A2_CANLF;tr|F1P8L8|F1P8L8_CANLF;tr|D6CJH8|D6CJH8_CANLF;tr|Q3LAG3|Q3LAG3_CANLF;tr|Q3LA82|Q3LA82_CANLF					4	4	4	18.6	18.6	18.6	41.467	0	196.23	4869100000	68	28.6998	27.8385	27.7378	28.1765	27.4534	27.4747	27.659	NaN	27.4893	27.7104	27.6467	27.6646
	0.796262	-0.290677	tr|F1P9V1|F1P9V1_CANLF;sp|Q8WMU5|FZD6_CANLF;tr|B8PZT3|B8PZT3_CANLF	tr|F1P9V1|F1P9V1_CANLF;sp|Q8WMU5|FZD6_CANLF;tr|B8PZT3|B8PZT3_CANLF					8	8	8	17.4	17.4	17.4	80.252	0	65.718	7222000000	84	27.9745	27.8706	28.4666	28.3602	28.237	27.6309	28.3799	28.5754	28.7757	28.1467	28.0254	28.0594
	0.397729	0.186822	sp|Q8WNN6|SODC_CANLF	sp|Q8WNN6|SODC_CANLF					3	3	1	30.7	30.7	9.2	15.801	0	27.878	5623600000	38	27.9491	27.1889	27.5694	28.194	27.7963	28.1486	27.3128	27.5119	27.3908	27.9906	27.8982	27.7691
	0.158821	-0.0467232	tr|J9P749|J9P749_CANLF;sp|Q95168|ZO2_CANLF;tr|F1PEE3|F1PEE3_CANLF	tr|J9P749|J9P749_CANLF;sp|Q95168|ZO2_CANLF;tr|F1PEE3|F1PEE3_CANLF					43	42	3	45.1	44.4	5.1	132.04	0	323.31	118890000000	622	32.4503	32.2721	32.152	32.5942	32.642	32.4996	32.4581	32.3142	32.2878	32.7204	32.6283	32.8229
	1.04854	-0.387413	sp|Q95KM5|CLD3_CANLF;tr|E2RBN4|E2RBN4_CANLF;tr|L7N0I6|L7N0I6_CANLF	sp|Q95KM5|CLD3_CANLF					3	3	2	13.3	13.3	6	23.148	0	37.88	16769000000	66	29.618	29.8792	29.5004	29.4523	29.5226	29.2194	30.4393	30.1904	30.0389	29.5404	29.388	29.6487
	0.0955614	0.0812147	sp|Q95KM6|CLD2_CANLF;tr|J9NUV1|J9NUV1_CANLF	sp|Q95KM6|CLD2_CANLF;tr|J9NUV1|J9NUV1_CANLF					5	5	5	27.4	27.4	27.4	24.502	0	136.23	44536000000	61	29.7207	31.3454	31.0112	31.2823	31.2608	31.2722	30.296	31.1063	31.0654	31.0021	31.0346	31.0318
	0.33808	-0.135583	tr|J9NZ75|J9NZ75_CANLF;tr|F1PWS8|F1PWS8_CANLF;sp|Q9BEA0|EGF_CANLF	tr|J9NZ75|J9NZ75_CANLF;tr|F1PWS8|F1PWS8_CANLF;sp|Q9BEA0|EGF_CANLF					4	4	4	4.2	4.2	4.2	133.81	0	12.875	2838100000	19	27.698	27.2352	26.9754	27.2357	NaN	NaN	27.4955	27.5186	27.4974	NaN	27.1752	NaN
	0.31126	-0.114898	sp|Q9GKK4|GALK1_CANLF	sp|Q9GKK4|GALK1_CANLF					9	9	9	26.3	26.3	26.3	42.12	0	76.025	7452300000	49	28.4054	28.3876	28.3006	28.4442	27.7567	28.2174	28.6928	28.317	28.5434	27.9811	28.3	28.1814
	0.11602	0.069208	sp|Q9GL24|CATL1_CANLF;tr|J9P7C5|J9P7C5_CANLF	sp|Q9GL24|CATL1_CANLF					10	10	10	41.1	41.1	41.1	37.383	0	323.31	113380000000	242	31.9317	31.992	31.5557	32.7945	32.5495	32.6155	32.1047	32.0067	32.1173	32.3373	32.287	32.5378
	0.309507	0.111866	sp|Q9GMY1|QKI_CANLF;tr|J9NVZ6|J9NVZ6_CANLF;tr|F1PLY2|F1PLY2_CANLF;tr|F1PX61|F1PX61_CANLF	sp|Q9GMY1|QKI_CANLF;tr|J9NVZ6|J9NVZ6_CANLF;tr|F1PLY2|F1PLY2_CANLF;tr|F1PX61|F1PX61_CANLF					9	9	9	32.3	32.3	32.3	37.67	0	44.566	11996000000	86	29.566	28.9661	28.8695	28.8293	28.8423	29.0668	28.8283	28.7913	29.2226	29.0529	28.6622	29.0551
	0.228303	-0.101881	sp|Q9MYU8|E41L5_CANLF;tr|J9NRS0|J9NRS0_CANLF	sp|Q9MYU8|E41L5_CANLF;tr|J9NRS0|J9NRS0_CANLF					12	12	1	38.2	38.2	4.6	57.91	0	111.59	8955300000	130	27.8459	28.5636	28.7213	28.7598	28.7076	28.694	28.6441	28.8002	28.9343	28.3579	28.5164	28.237
	1.08872	0.394495	sp|Q9N0Y3|MX1_CANLF	sp|Q9N0Y3|MX1_CANLF					9	9	7	19.8	19.8	14.2	74.8	0	190.74	6533800000	85	28.3506	27.7559	28.355	28.7413	28.958	28.5244	28.0694	28.2359	28.165	27.7398	28.0552	28.6285
	0.0247623	0.0114971	sp|Q9TQX6|ACBP_CANLF;tr|J9NTT2|J9NTT2_CANLF;tr|F1PAC7|F1PAC7_CANLF;tr|Q7M3A6|Q7M3A6_CANLF	sp|Q9TQX6|ACBP_CANLF;tr|J9NTT2|J9NTT2_CANLF;tr|F1PAC7|F1PAC7_CANLF;tr|Q7M3A6|Q7M3A6_CANLF					7	7	7	86.2	86.2	86.2	9.9782	0	95.446	34537000000	80	30.9017	30.7903	30.5404	30.6652	30.6738	30.0541	30.8444	30.6188	30.5131	30.2627	30.7247	30.361
	0.553887	0.197724	tr|F1PWH9|F1PWH9_CANLF;sp|Q9TRY9|BGAL_CANLF;tr|F1PDK3|F1PDK3_CANLF;tr|Q5S1U9|Q5S1U9_CANLF;tr|Q6DWK1|Q6DWK1_CANLF;tr|Q5UD51|Q5UD51_CANLF;tr|Q5UD52|Q5UD52_CANLF;tr|Q6DW09|Q6DW09_CANLF;tr|Q670Q0|Q670Q0_CANLF;tr|Q670P7|Q670P7_CANLF;tr|Q670Q1|Q670Q1_CANLF;tr|Q670Q2|Q670Q2_CANLF	tr|F1PWH9|F1PWH9_CANLF;sp|Q9TRY9|BGAL_CANLF;tr|F1PDK3|F1PDK3_CANLF;tr|Q5S1U9|Q5S1U9_CANLF;tr|Q6DWK1|Q6DWK1_CANLF					12	12	11	26.8	26.8	26.8	72.194	0	210.34	31816000000	251	30.0556	29.9366	30.1976	30.8002	30.6058	30.7435	30.0778	30.1813	30.2869	30.268	30.1469	30.4754
	0.844059	0.382212	tr|F1PAX0|F1PAX0_CANLF;sp|Q9TSX8|VNN1_CANLF;tr|E2QYS4|E2QYS4_CANLF;tr|F1PDF3|F1PDF3_CANLF	tr|F1PAX0|F1PAX0_CANLF;sp|Q9TSX8|VNN1_CANLF;tr|E2QYS4|E2QYS4_CANLF					4	4	4	8.8	8.8	8.8	57.661	0	16.785	4403100000	44	28.2959	27.5865	27.4538	27.7096	27.3923	27.5904	27.1707	NaN	27.4123	26.7844	27.7893	26.8653
	0.155198	0.0647374	sp|Q9TSZ6|DAG1_CANLF	sp|Q9TSZ6|DAG1_CANLF					13	13	13	20	20	20	97.191	0	135.1	17117000000	142	29.1629	29.4459	29.4742	29.3564	29.5501	29.4124	28.9704	29.4107	28.9419	29.5518	29.803	29.3076
	0.12196	0.0882584	tr|F1PBC8|F1PBC8_CANLF;sp|Q9TT99|ATOX1_CANLF	tr|F1PBC8|F1PBC8_CANLF;sp|Q9TT99|ATOX1_CANLF					3	3	3	47.8	47.8	47.8	7.3053	0	47.839	5013700000	65	27.8542	28.4328	27.8703	27.6777	27.494	27.7335	27.0853	27.807	27.3497	27.9528	28.5828	27.895
	0.717918	0.393011	sp|Q9TV68|DHDH_CANLF	sp|Q9TV68|DHDH_CANLF					6	6	6	32.2	32.2	32.2	36.425	0	47.511	2127900000	52	26.0942	25.6381	26.77	27.0542	26.7661	26.709	26.2872	26.0627	25.5269	26.4344	26.2503	26.292
	0.935221	0.424546	sp|Q9XSB8|TPP1_CANLF;tr|Z4YHH2|Z4YHH2_CANLF	sp|Q9XSB8|TPP1_CANLF;tr|Z4YHH2|Z4YHH2_CANLF					5	5	5	16.9	16.9	16.9	61.361	0	75.017	21086000000	78	30.6211	29.3797	29.5401	29.402	30.0349	29.5997	29.5365	29.2151	29.6577	29.322	28.9605	29.0903
	5.77161	0.552348	sp|Q9XSR3|RBM47_CANLF;tr|F1Q212|F1Q212_CANLF;tr|E2RTF9|E2RTF9_CANLF;tr|E2R8F4|E2R8F4_CANLF	sp|Q9XSR3|RBM47_CANLF;tr|F1Q212|F1Q212_CANLF					20	20	20	49.2	49.2	49.2	63.523	0	323.31	170500000000	528	33.2094	33.0171	33.1918	33.0859	33.1646	33.0936	32.6174	32.5793	32.7066	32.4899	32.4803	32.4241
	0.137186	-0.0695072	tr|F1PI16|F1PI16_CANLF;sp|Q9XSU0|RL13A_CANLF;tr|F6UMX6|F6UMX6_CANLF	tr|F1PI16|F1PI16_CANLF;sp|Q9XSU0|RL13A_CANLF					11	11	11	42.4	42.4	42.4	23.535	0	57.478	58078000000	203	31.6563	31.4145	30.9048	31.2008	30.8545	30.8919	31.4645	31.0852	31.474	30.7434	31.3495	30.9282
	2.72311	1.11331	tr|F2Z4N3|F2Z4N3_CANLF;sp|Q9XSU7|RL27_CANLF;tr|E2QVG7|E2QVG7_CANLF;tr|E2R202|E2R202_CANLF	tr|F2Z4N3|F2Z4N3_CANLF;sp|Q9XSU7|RL27_CANLF					7	7	7	48.5	48.5	48.5	15.798	0	92.64	65118000000	116	31.2759	31.8082	31.544	30.6123	31.1678	30.4586	29.9073	30.1007	30.1227	29.6823	30.3429	30.2089
	0.199519	-0.0968414	tr|V5LJX3|V5LJX3_CANLF;tr|V5LJU1|V5LJU1_CANLF;tr|V5LJG3|V5LJG3_CANLF;tr|Q49RZ2|Q49RZ2_CANLF;tr|Q49RW6|Q49RW6_CANLF;tr|Q49RQ1|Q49RQ1_CANLF;tr|Q49RM5|Q49RM5_CANLF;tr|Q49RI6|Q49RI6_CANLF;tr|Q49RC1|Q49RC1_CANLF;tr|Q1HKY0|Q1HKY0_CANLF;tr|Q1HKV1|Q1HKV1_CANLF;tr|Q1HKH1|Q1HKH1_CANLF;tr|Q1HKF8|Q1HKF8_CANLF;tr|H8Y5L5|H8Y5L5_CANLF;tr|H8Y549|H8Y549_CANLF;tr|H8Y449|H8Y449_CANLF;tr|H8Y3D0|H8Y3D0_CANLF;tr|H8Y2N…	tr|V5LJX3|V5LJX3_CANLF;tr|V5LJU1|V5LJU1_CANLF;tr|V5LJG3|V5LJG3_CANLF;tr|Q49RZ2|Q49RZ2_CANLF;tr|Q49RW6|Q49RW6_CANLF;tr|Q49RQ1|Q49RQ1_CANLF;tr|Q49RM5|Q49RM5_CANLF;tr|Q49RI6|Q49RI6_CANLF;tr|Q49RC1|Q49RC1_CANLF;tr|Q1HKY0|Q1HKY0_CANLF;tr|Q1HKV1|Q1HKV1_CANLF;tr|Q1HKH1|Q1HKH1_CANLF;tr|Q1HKF8|Q1HKF8_CANLF;tr|H8Y5L5|H8Y5L5_CANLF;tr|H8Y549|H8Y549_CANLF;tr|H8Y449|H8Y449_CANLF;tr|H8Y3D0|H8Y3D0_CANLF;tr|H8Y2N…					10	10	10	19.8	19.8	19.8	67.251	0	293.97	20939000000	191	29.8302	29.6134	29.4098	29.3692	30.2358	29.5797	30.3166	29.7444	29.4637	29.7026	29.6219	29.4359
	1.24609	0.807618	tr|A0A193BKX7|A0A193BKX7_CANLF;tr|A0A0K0K968|A0A0K0K968_CANLF;tr|A0A0K0K935|A0A0K0K935_CANLF;tr|A0A0K0K835|A0A0K0K835_CANLF;tr|A0A060GW50|A0A060GW50_CANLF;tr|A0A060GW39|A0A060GW39_CANLF;tr|A0A060GVT9|A0A060GVT9_CANLF;tr|A0A060GUX1|A0A060GUX1_CANLF;tr|A0A060GPK0|A0A060GPK0_CANLF;tr|A0A060GKU4|A0A060GKU4_CANLF;tr|A0A060GKL4|A0A060GKL4_CANLF;tr|V5LKJ7|V5LKJ7_CANLF;tr|V5LJT6|V5LJT6_CANLF;tr|V5LHQ1|V5…	tr|A0A193BKX7|A0A193BKX7_CANLF;tr|A0A0K0K968|A0A0K0K968_CANLF;tr|A0A0K0K935|A0A0K0K935_CANLF;tr|A0A0K0K835|A0A0K0K835_CANLF;tr|A0A060GW50|A0A060GW50_CANLF;tr|A0A060GW39|A0A060GW39_CANLF;tr|A0A060GVT9|A0A060GVT9_CANLF;tr|A0A060GUX1|A0A060GUX1_CANLF;tr|A0A060GPK0|A0A060GPK0_CANLF;tr|A0A060GKU4|A0A060GKU4_CANLF;tr|A0A060GKL4|A0A060GKL4_CANLF;tr|V5LKJ7|V5LKJ7_CANLF;tr|V5LJT6|V5LJT6_CANLF;tr|V5LHQ1|V5…					4	4	4	24.3	24.3	24.3	12.812	0	162.42	11297000000	205	28.6809	27.9658	29.1532	29.4818	30.0697	29.0959	27.6033	28.0681	28.3818	28.5091	28.7723	28.3399
	0.854679	0.308874	tr|Q49RZ8|Q49RZ8_CANLF;tr|Q49RP4|Q49RP4_CANLF;tr|C4MS78|C4MS78_CANLF;tr|B9TYB1|B9TYB1_CANLF;tr|A0A172RN71|A0A172RN71_CANLF;tr|A0A172RAV4|A0A172RAV4_CANLF;tr|A0A172R7Q5|A0A172R7Q5_CANLF;sp|Q9ZZ63|ATP8_CANLF;tr|V5LK29|V5LK29_CANLF;tr|V5LLA4|V5LLA4_CANLF;tr|H8Y5C1|H8Y5C1_CANLF;tr|H8Y3Z1|H8Y3Z1_CANLF;tr|A0A172R8A3|A0A172R8A3_CANLF;tr|Q1HKK3|Q1HKK3_CANLF;tr|C4MSN4|C4MSN4_CANLF;tr|A0A0K0K825|A0A0K0K825…	tr|Q49RZ8|Q49RZ8_CANLF;tr|Q49RP4|Q49RP4_CANLF;tr|C4MS78|C4MS78_CANLF;tr|B9TYB1|B9TYB1_CANLF;tr|A0A172RN71|A0A172RN71_CANLF;tr|A0A172RAV4|A0A172RAV4_CANLF;tr|A0A172R7Q5|A0A172R7Q5_CANLF;sp|Q9ZZ63|ATP8_CANLF;tr|V5LK29|V5LK29_CANLF;tr|V5LLA4|V5LLA4_CANLF;tr|H8Y5C1|H8Y5C1_CANLF;tr|H8Y3Z1|H8Y3Z1_CANLF;tr|A0A172R8A3|A0A172R8A3_CANLF;tr|Q1HKK3|Q1HKK3_CANLF;tr|C4MSN4|C4MSN4_CANLF;tr|A0A0K0K825|A0A0K0K825…					3	3	3	50.7	50.7	50.7	7.9783	0	40.128	16263000000	180	30.0322	29.776	29.8574	29.1054	29.5718	29.2867	29.4614	29.4344	29.4773	28.869	29.2382	29.1765
	0.498093	0.616792	tr|A0A193BKX0|A0A193BKX0_CANLF;tr|V5LKW6|V5LKW6_CANLF;tr|V5LJT9|V5LJT9_CANLF;tr|V5LJQ6|V5LJQ6_CANLF;tr|V5LJN1|V5LJN1_CANLF;tr|Q49S01|Q49S01_CANLF;tr|Q49RX5|Q49RX5_CANLF;tr|Q49RT6|Q49RT6_CANLF;tr|Q49RJ5|Q49RJ5_CANLF;tr|Q1HKN2|Q1HKN2_CANLF;tr|Q1HKI0|Q1HKI0_CANLF;tr|Q1HKG7|Q1HKG7_CANLF;tr|H8Y440|H8Y440_CANLF;tr|H8Y3U9|H8Y3U9_CANLF;tr|H8Y3R0|H8Y3R0_CANLF;tr|H8Y2T6|H8Y2T6_CANLF;tr|H8Y2N4|H8Y2N4_CANLF;…	tr|A0A193BKX0|A0A193BKX0_CANLF;tr|V5LKW6|V5LKW6_CANLF;tr|V5LJT9|V5LJT9_CANLF;tr|V5LJQ6|V5LJQ6_CANLF;tr|V5LJN1|V5LJN1_CANLF;tr|Q49S01|Q49S01_CANLF;tr|Q49RX5|Q49RX5_CANLF;tr|Q49RT6|Q49RT6_CANLF;tr|Q49RJ5|Q49RJ5_CANLF;tr|Q1HKN2|Q1HKN2_CANLF;tr|Q1HKI0|Q1HKI0_CANLF;tr|Q1HKG7|Q1HKG7_CANLF;tr|H8Y440|H8Y440_CANLF;tr|H8Y3U9|H8Y3U9_CANLF;tr|H8Y3R0|H8Y3R0_CANLF;tr|H8Y2T6|H8Y2T6_CANLF;tr|H8Y2N4|H8Y2N4_CANLF;…					1	1	1	8.3	8.3	8.3	22.664	0	11.48	768700000	48	24.958	NaN	26.3296	24.6898	25.4156	NaN	NaN	24.6781	24.7848	NaN	NaN	24.517
	0.228065	-0.0792049	tr|Q49RZ9|Q49RZ9_CANLF;tr|H8Y2M3|H8Y2M3_CANLF;tr|C4MSS2|C4MSS2_CANLF;tr|A0A172RRN6|A0A172RRN6_CANLF;tr|A0A172RI05|A0A172RI05_CANLF;tr|A0A060H4R6|A0A060H4R6_CANLF;tr|H8Y2X7|H8Y2X7_CANLF;tr|A0A289ZC75|A0A289ZC75_CANLF;tr|A0A289YRD8|A0A289YRD8_CANLF;tr|A0A289YDE6|A0A289YDE6_CANLF;tr|A0A289Y2F9|A0A289Y2F9_CANLF;tr|V5LKV5|V5LKV5_CANLF;tr|V5LKB8|V5LKB8_CANLF;tr|V5LK77|V5LK77_CANLF;tr|Q49RY6|Q49RY6_CANL…	tr|Q49RZ9|Q49RZ9_CANLF;tr|H8Y2M3|H8Y2M3_CANLF;tr|C4MSS2|C4MSS2_CANLF;tr|A0A172RRN6|A0A172RRN6_CANLF;tr|A0A172RI05|A0A172RI05_CANLF;tr|A0A060H4R6|A0A060H4R6_CANLF;tr|H8Y2X7|H8Y2X7_CANLF;tr|A0A289ZC75|A0A289ZC75_CANLF;tr|A0A289YRD8|A0A289YRD8_CANLF;tr|A0A289YDE6|A0A289YDE6_CANLF;tr|A0A289Y2F9|A0A289Y2F9_CANLF;tr|V5LKV5|V5LKV5_CANLF;tr|V5LKB8|V5LKB8_CANLF;tr|V5LK77|V5LK77_CANLF;tr|Q49RY6|Q49RY6_CANL…					5	5	5	27.8	27.8	27.8	26.031	0	233.85	120470000000	274	32.0894	32.0117	32.1555	32.4401	32.1392	32.5056	32.1036	32.0562	32.159	32.572	32.6231	32.4554
	2.82331	1.00197	tr|A0A0A0MPB2|A0A0A0MPB2_CANLF;sp|E2QUD0|GATA_CANLF	tr|A0A0A0MPB2|A0A0A0MPB2_CANLF;sp|E2QUD0|GATA_CANLF					12	12	12	41	41	41	57.428	0	66.817	2436600000	58	26.8321	NaN	27.1808	27.5421	27.7272	27.6894	26.0219	26.64	26.3924	26.6922	26.2152	26.2965
	0.358334	-0.111761	tr|A0A0B4J194|A0A0B4J194_CANLF	tr|A0A0B4J194|A0A0B4J194_CANLF					27	27	15	57.9	57.9	39.5	47.44	0	323.31	306030000000	639	33.9136	33.8698	33.9078	33.4625	33.358	33.7004	33.9102	33.9726	33.9456	33.7752	33.4651	33.6329
	0.812174	-0.337964	tr|A0A0B4J195|A0A0B4J195_CANLF	tr|A0A0B4J195|A0A0B4J195_CANLF					3	3	3	10.9	10.9	10.9	46.413	0	82.867	2000500000	40	27.2402	26.9245	26.9811	26.6291	NaN	26.3474	27.1707	27.2294	27.0871	NaN	NaN	25.4383
	0.451478	0.0817227	tr|A0A0B4J1A0|A0A0B4J1A0_CANLF;tr|J9JH90|J9JH90_CANLF;tr|J9PBJ4|J9PBJ4_CANLF	tr|A0A0B4J1A0|A0A0B4J1A0_CANLF;tr|J9JH90|J9JH90_CANLF;tr|J9PBJ4|J9PBJ4_CANLF					8	8	8	27.9	27.9	27.9	38.063	0	271.79	8628300000	119	28.689	28.3487	28.346	28.59	28.2613	28.4855	28.2383	28.3137	28.414	28.4093	28.4831	28.6539
	0.800494	-0.301152	tr|A0A0N9JIB9|A0A0N9JIB9_CANLF;tr|F1P916|F1P916_CANLF	tr|A0A0N9JIB9|A0A0N9JIB9_CANLF;tr|F1P916|F1P916_CANLF					24	13	2	61.6	42.6	9.2	32.71	0	137.67	25126000000	85	30.1677	29.5454	29.5588	30.3897	30.2248	30.0819	30.3076	30.16	30.0052	30.2656	30.741	30.2187
	0.136775	-0.0689611	tr|J9P4Y4|J9P4Y4_CANLF;tr|E2R0A1|E2R0A1_CANLF;tr|A0A0U2JXS9|A0A0U2JXS9_CANLF;tr|A0A0U2KTF7|A0A0U2KTF7_CANLF;tr|A0A0U2KQ38|A0A0U2KQ38_CANLF;tr|A0A0U2KUF8|A0A0U2KUF8_CANLF	tr|J9P4Y4|J9P4Y4_CANLF;tr|E2R0A1|E2R0A1_CANLF;tr|A0A0U2JXS9|A0A0U2JXS9_CANLF;tr|A0A0U2KTF7|A0A0U2KTF7_CANLF;tr|A0A0U2KQ38|A0A0U2KQ38_CANLF;tr|A0A0U2KUF8|A0A0U2KUF8_CANLF					4	4	4	7.4	7.4	7.4	66.201	0	19.769	2679500000	39	27.6552	27.2697	27.0118	26.9734	26.7939	27.2937	27.0964	NaN	27.2032	27.4062	NaN	NaN
	0.0796693	-0.0588717	tr|A0A140KFN8|A0A140KFN8_CANLF;tr|J9PB59|J9PB59_CANLF;tr|Q30348|Q30348_CANLF;tr|Q30341|Q30341_CANLF;sp|P18470|HB2D_CANLF;tr|F6V690|F6V690_CANLF	tr|A0A140KFN8|A0A140KFN8_CANLF;tr|J9PB59|J9PB59_CANLF;tr|Q30348|Q30348_CANLF;tr|Q30341|Q30341_CANLF;sp|P18470|HB2D_CANLF;tr|F6V690|F6V690_CANLF					7	1	0	29.7	6.4	0	30.334	0	114.71	10677000000	53	28.8388	28.1803	27.8588	28.967	29.0048	28.7322	28.4636	28.6515	28.175	28.6812	29.3078	28.6809
	0.21964	-0.0592143	tr|A0A140KFP1|A0A140KFP1_CANLF;tr|A0A140KFN9|A0A140KFN9_CANLF;tr|Q95HQ7|Q95HQ7_CANLF;tr|G8XQP8|G8XQP8_CANLF;tr|G5D540|G5D540_CANLF;tr|G5D530|G5D530_CANLF	tr|A0A140KFP1|A0A140KFP1_CANLF;tr|A0A140KFN9|A0A140KFN9_CANLF;tr|Q95HQ7|Q95HQ7_CANLF;tr|G8XQP8|G8XQP8_CANLF;tr|G5D540|G5D540_CANLF;tr|G5D530|G5D530_CANLF					8	8	0	30.8	30.8	0	30.308	0	207.68	65542000000	174	31.2385	31.5717	31.6083	31.6069	31.4037	31.6902	31.6186	31.5369	31.3277	31.5362	31.8762	31.5304
	0.230496	0.10494	tr|A0A140T8E0|A0A140T8E0_CANLF	tr|A0A140T8E0|A0A140T8E0_CANLF					11	11	11	17.3	17.3	17.3	78.806	0	154.78	28908000000	176	29.7993	30.1179	30.1348	30.5968	30.6101	30.7649	30.1381	30.0118	30.1399	30.4869	30.385	30.5742
	0.143751	-0.0328417	tr|A0A140T8E6|A0A140T8E6_CANLF;tr|Q6VAH9|Q6VAH9_CANLF	tr|A0A140T8E6|A0A140T8E6_CANLF					43	43	38	71.9	71.9	66.3	81.758	0	323.31	441760000000	1507	34.3526	34.2675	34.4007	33.9631	34.2709	33.9549	34.2409	34.1998	34.2432	34.2409	34.2476	34.2276
	1.086	0.17959	tr|A0A1B1X461|A0A1B1X461_CANLF;tr|E2RNY7|E2RNY7_CANLF;tr|J9NZA4|J9NZA4_CANLF;tr|J9P6P6|J9P6P6_CANLF	tr|A0A1B1X461|A0A1B1X461_CANLF;tr|E2RNY7|E2RNY7_CANLF					14	14	14	49	49	49	33.053	0	196.28	144190000000	312	32.7707	32.7316	32.6042	32.6438	32.8894	32.8499	32.4709	32.4611	32.4282	32.8888	32.5944	32.7968
	0.649038	-0.0857829	tr|E2RNG2|E2RNG2_CANLF;tr|A0A1B1X469|A0A1B1X469_CANLF	tr|E2RNG2|E2RNG2_CANLF;tr|A0A1B1X469|A0A1B1X469_CANLF					35	35	21	55.9	55.9	37.4	59.674	0	323.31	946610000000	1332	35.2552	35.3889	35.3441	35.1842	35.4006	35.3252	35.2537	35.3467	35.4286	35.6137	35.3681	35.5212
	1.02544	0.47584	tr|A0A1B4XK92|A0A1B4XK92_CANLF	tr|A0A1B4XK92|A0A1B4XK92_CANLF					5	1	1	37	11	11	20.595	0	89.945	4479100000	36	27.6184	28.0724	27.3503	NaN	27.8674	27.6887	NaN	27.4519	27.0353	NaN	NaN	NaN
	1.54114	-0.546699	tr|A0A222YTD8|A0A222YTD8_CANLF;tr|F1PA89|F1PA89_CANLF	tr|A0A222YTD8|A0A222YTD8_CANLF;tr|F1PA89|F1PA89_CANLF					3	3	3	3.5	3.5	3.5	94.23	0	6.5745	709560000	21	25.0603	25.3473	24.7629	25.0564	25.164	NaN	25.9379	25.7877	25.7031	NaN	25.0708	NaN
	1.15166	0.266118	tr|A0A286T5F5|A0A286T5F5_CANLF;tr|J9NYU7|J9NYU7_CANLF;tr|F1PH55|F1PH55_CANLF	tr|A0A286T5F5|A0A286T5F5_CANLF;tr|J9NYU7|J9NYU7_CANLF;tr|F1PH55|F1PH55_CANLF					16	16	16	32.3	32.3	32.3	82.9	0	217.65	12444000000	155	29.0468	28.6195	28.8224	29.1591	28.6033	28.8014	28.5806	28.2837	28.5376	28.6333	28.8446	28.4046
	1.67947	0.422743	tr|A0MJA4|A0MJA4_CANLF;tr|H9GW62|H9GW62_CANLF;tr|J9PBB6|J9PBB6_CANLF	tr|A0MJA4|A0MJA4_CANLF;tr|H9GW62|H9GW62_CANLF					12	12	12	10.5	10.5	10.5	143.89	0	49.468	17261000000	107	30.0793	29.5917	29.6246	29.6138	29.5029	29.6367	28.897	29.5227	28.962	29.4219	29.4569	29.2945
	0.255032	0.125617	tr|A1DZY5|A1DZY5_CANLF	tr|A1DZY5|A1DZY5_CANLF					8	8	8	45.6	45.6	45.6	26.787	0	323.31	73423000000	397	31.0289	31.3297	31.8747	32.078	31.6379	32.043	31.5201	31.7094	31.4417	31.269	31.7585	31.5348
	0.0932426	-0.0414317	tr|A2SUG4|A2SUG4_CANLF;tr|A2SUG5|A2SUG5_CANLF;tr|A2SUG6|A2SUG6_CANLF	tr|A2SUG4|A2SUG4_CANLF;tr|A2SUG5|A2SUG5_CANLF;tr|A2SUG6|A2SUG6_CANLF					4	4	1	15.5	15.5	4.3	31.52	0	52.027	3361000000	46	27.439	27.0066	26.642	27.1362	27.4845	27.5158	27.2673	27.2005	27.3349	27.3866	27.0379	27.1813
	0.0561904	-0.0308529	tr|A2SXS7|A2SXS7_CANLF	tr|A2SXS7|A2SXS7_CANLF					23	23	23	43.1	43.1	43.1	60.576	0	76.096	26452000000	267	30.3016	30.1428	30.4711	29.3892	30.0753	29.5995	29.8837	30.0726	30.0738	29.8984	30.2087	29.9557
	1.15902	0.351689	tr|A4GT58|A4GT58_CANLF	tr|A4GT58|A4GT58_CANLF					14	14	14	43.7	43.7	43.7	50.585	0	145.21	18960000000	202	29.2795	29.243	29.329	29.7725	29.6283	29.8298	28.6341	29.3142	29.3964	29.1802	29.2852	29.5994
	0.477235	-0.0780989	tr|A8W340|A8W340_CANLF;tr|F1PAR8|F1PAR8_CANLF;tr|J9P0Q7|J9P0Q7_CANLF;tr|J9P9X2|J9P9X2_CANLF	tr|A8W340|A8W340_CANLF;tr|F1PAR8|F1PAR8_CANLF;tr|J9P0Q7|J9P0Q7_CANLF					18	18	18	67.3	67.3	67.3	29.804	0	323.31	296770000000	667	33.4794	33.803	33.7796	33.6931	33.7004	33.7201	33.987	33.7447	33.8094	33.7184	33.6107	33.6789
	1.8864	0.220271	tr|A8WED5|A8WED5_CANLF;tr|F1PIQ9|F1PIQ9_CANLF;sp|O18735|ERBB2_CANLF;tr|A0A060PY73|A0A060PY73_CANLF;tr|A0A0A0WE41|A0A0A0WE41_CANLF;tr|J9P9R2|J9P9R2_CANLF;tr|J9P025|J9P025_CANLF;tr|E2R7P5|E2R7P5_CANLF;tr|F1P627|F1P627_CANLF;tr|E2RHY5|E2RHY5_CANLF;tr|F1P626|F1P626_CANLF;tr|J9P9H9|J9P9H9_CANLF	tr|A8WED5|A8WED5_CANLF;tr|F1PIQ9|F1PIQ9_CANLF;sp|O18735|ERBB2_CANLF					27	27	25	30.9	30.9	29.3	136.11	0	323.31	32838000000	305	30.5595	30.6566	30.5859	30.8067	30.758	30.688	30.2685	30.457	30.4668	30.4229	30.6624	30.3087
	0.296512	-0.0811029	tr|F1PWR1|F1PWR1_CANLF;tr|B1H0W0|B1H0W0_CANLF	tr|F1PWR1|F1PWR1_CANLF;tr|B1H0W0|B1H0W0_CANLF					41	41	41	24	24	24	268.61	0	323.31	33566000000	306	30.3201	30.2617	30.2292	30.7037	30.5466	30.688	30.4547	30.362	30.5909	30.7874	30.5016	30.791
	0.309011	0.0855493	tr|F1PA99|F1PA99_CANLF;tr|J9NY30|J9NY30_CANLF;tr|B2BMP5|B2BMP5_CANLF	tr|F1PA99|F1PA99_CANLF;tr|J9NY30|J9NY30_CANLF;tr|B2BMP5|B2BMP5_CANLF					10	10	10	22.9	22.9	22.9	45.591	0	66.513	13108000000	100	29.5422	29.121	29.4397	29.467	29.2987	29.3295	29.0397	29.555	29.5256	29.1863	29.0975	29.4605
	0.382029	0.109573	tr|B2KN54|B2KN54_CANLF;tr|F6PLL5|F6PLL5_CANLF	tr|B2KN54|B2KN54_CANLF;tr|F6PLL5|F6PLL5_CANLF					21	21	21	31.9	31.9	31.9	98.199	0	222.58	36683000000	428	30.9452	30.441	30.9787	30.5539	30.7647	30.5047	30.6741	30.6698	30.8012	30.3567	30.4403	29.9614
	0.707707	0.21718	tr|B3SI03|B3SI03_CANLF;tr|B3SI04|B3SI04_CANLF;tr|Q7M3H7|Q7M3H7_CANLF	tr|B3SI03|B3SI03_CANLF;tr|B3SI04|B3SI04_CANLF					22	2	2	51.4	4.9	4.9	46.508	0	8.8549	16574000000	31	30.1819	30.0535	29.9962	29.851	29.5556	29.9474	30.1044	29.7383	29.853	29.5736	29.2995	29.5233
	1.01742	0.701604	tr|B3VMJ2|B3VMJ2_CANLF;tr|J9JHR5|J9JHR5_CANLF;tr|F1PEL7|F1PEL7_CANLF	tr|B3VMJ2|B3VMJ2_CANLF;tr|J9JHR5|J9JHR5_CANLF;tr|F1PEL7|F1PEL7_CANLF					19	19	19	9.2	9.2	9.2	349.24	0	116.5	4756900000	80	27.2935	27.1164	27.6885	27.5219	28.0813	27.9105	26.5916	NaN	26.3291	27.7804	NaN	28.066
	0.580362	0.208928	tr|J9P9T3|J9P9T3_CANLF;tr|B4YY02|B4YY02_CANLF	tr|J9P9T3|J9P9T3_CANLF;tr|B4YY02|B4YY02_CANLF					8	8	8	46.4	46.4	46.4	21.65	0	66.865	6555700000	81	NaN	28.605	27.9508	28.1857	27.8676	27.8459	27.6087	28.1893	27.9293	27.9516	27.7315	27.9161
	0.464301	0.323303	tr|B4YY03|B4YY03_CANLF;tr|F1P9X4|F1P9X4_CANLF	tr|B4YY03|B4YY03_CANLF;tr|F1P9X4|F1P9X4_CANLF					9	9	9	32	32	32	41.724	0	256.62	14268000000	168	27.9858	29.1045	29.1556	29.6173	29.4836	29.504	28.1947	28.9192	28.5871	29.2814	29.1101	28.7846
	0.171839	0.048768	tr|B6F250|B6F250_CANLF;tr|F1PFS1|F1PFS1_CANLF	tr|B6F250|B6F250_CANLF;tr|F1PFS1|F1PFS1_CANLF					19	19	19	66.2	66.2	66.2	31.207	0	323.31	227210000000	798	33.1359	32.8982	33.1596	33.0523	33.5516	33.1822	33.1439	32.9507	33.0948	33.3199	33.0634	33.385
	0.862014	-0.121479	tr|B7ZDP5|B7ZDP5_CANLF	tr|B7ZDP5|B7ZDP5_CANLF					9	9	1	49.2	49.2	11.7	13.986	0	91.098	145380000000	290	32.5335	32.4813	32.5504	32.3398	32.6764	32.4845	32.5522	32.5414	32.527	32.8475	32.6942	32.6451
	0.175081	0.0608617	tr|F1PNA2|F1PNA2_CANLF;tr|B8K1W7|B8K1W7_CANLF;tr|J9P084|J9P084_CANLF;tr|F1Q0Y0|F1Q0Y0_CANLF	tr|F1PNA2|F1PNA2_CANLF;tr|B8K1W7|B8K1W7_CANLF					28	27	27	27.4	26.8	26.8	149.61	0	323.31	27937000000	263	30.5418	30.01	30.1309	30.136	30.0444	29.863	30.351	30.1049	30.0835	29.7232	30.0381	29.8639
	0.172263	0.103205	tr|O46605|O46605_CANLF;tr|Q8HZQ9|Q8HZQ9_CANLF;tr|Q4PLA8|Q4PLA8_CANLF;tr|C0KKU9|C0KKU9_CANLF;tr|Q6PSM2|Q6PSM2_CANLF;tr|Q8WNU6|Q8WNU6_CANLF;tr|O77794|O77794_CANLF;tr|Q8HYR5|Q8HYR5_CANLF;tr|F1PH11|F1PH11_CANLF;tr|O18808|O18808_CANLF	tr|O46605|O46605_CANLF;tr|Q8HZQ9|Q8HZQ9_CANLF;tr|Q4PLA8|Q4PLA8_CANLF;tr|C0KKU9|C0KKU9_CANLF;tr|Q6PSM2|Q6PSM2_CANLF;tr|Q8WNU6|Q8WNU6_CANLF					23	23	23	22.7	22.7	22.7	141.52	0	289.27	24988000000	169	29.4358	29.6892	29.9435	30.3947	30.286	30.5531	29.9538	30.049	29.3892	30.1965	30.1475	29.9677
	0.462049	-0.20214	tr|C1IPW3|C1IPW3_CANLF;tr|J9P6Y7|J9P6Y7_CANLF;tr|F2Y8J7|F2Y8J7_CANLF	tr|C1IPW3|C1IPW3_CANLF;tr|J9P6Y7|J9P6Y7_CANLF					7	7	7	21.6	21.6	21.6	53.409	0	23.768	3566900000	15	27.3772	27.0986	27.4019	27.9589	27.0015	27.6623	NaN	27.6887	27.8174	27.2983	27.6711	27.4249
	0.607135	0.114721	tr|C1KG39|C1KG39_CANLF;tr|E2R329|E2R329_CANLF	tr|C1KG39|C1KG39_CANLF;tr|E2R329|E2R329_CANLF					22	22	22	47.5	47.5	47.5	60.305	0	263.37	60363000000	334	31.0155	30.5788	30.8264	30.995	30.8582	31.0278	30.9143	30.6331	30.7192	30.8903	30.6875	30.7601
	0.741317	-0.144171	tr|C7C419|C7C419_CANLF	tr|C7C419|C7C419_CANLF					25	25	2	56.5	56.5	3.1	46.61	0	323.31	426450000000	694	34.1455	34.2462	34.3064	33.845	34.2241	33.9485	34.0463	34.4067	34.2307	34.2887	34.3449	34.1501
	0.130187	0.0516717	tr|F1PSQ3|F1PSQ3_CANLF;tr|D2YYC0|D2YYC0_CANLF;tr|E2R327|E2R327_CANLF;tr|E2R326|E2R326_CANLF	tr|F1PSQ3|F1PSQ3_CANLF;tr|D2YYC0|D2YYC0_CANLF					10	10	6	30.1	30.1	15.3	48.239	0	135.78	20703000000	159	29.6294	29.446	29.3992	30.234	29.712	29.8309	29.6736	29.5461	29.7312	29.8714	29.4624	30.0687
	1.15112	0.397674	tr|D5LG84|D5LG84_CANLF;tr|F1P7R1|F1P7R1_CANLF;tr|Q2EFX8|Q2EFX8_CANLF	tr|D5LG84|D5LG84_CANLF;tr|F1P7R1|F1P7R1_CANLF					14	14	14	25.4	25.4	25.4	76.981	0	205	18211000000	292	28.9636	29.6825	29.8995	29.7789	29.9848	29.7311	28.8471	29.3178	29.4294	29.29	29.4943	29.2709
	1.81875	-0.287638	tr|D9ILX1|D9ILX1_CANLF;tr|E2R119|E2R119_CANLF;tr|J9NYU6|J9NYU6_CANLF	tr|D9ILX1|D9ILX1_CANLF;tr|E2R119|E2R119_CANLF					5	5	5	41	41	41	15.345	0	219.18	60790000000	153	31.3179	31.6493	31.4027	31.2209	31.3214	31.2199	31.5035	31.5352	31.5636	31.8721	31.7405	31.8577
	0.328516	-0.141326	tr|J9P4T2|J9P4T2_CANLF;tr|E2R508|E2R508_CANLF;tr|E1ACC5|E1ACC5_CANLF;tr|J9P001|J9P001_CANLF;tr|J9NZY6|J9NZY6_CANLF;tr|E7AIM5|E7AIM5_CANLF;tr|E7AIM4|E7AIM4_CANLF;tr|J9PAG8|J9PAG8_CANLF	tr|J9P4T2|J9P4T2_CANLF;tr|E2R508|E2R508_CANLF;tr|E1ACC5|E1ACC5_CANLF;tr|J9P001|J9P001_CANLF;tr|J9NZY6|J9NZY6_CANLF;tr|E7AIM5|E7AIM5_CANLF					14	14	14	31.6	31.6	31.6	72.143	0	125.96	9261700000	106	28.069	28.1466	28.3705	28.9234	28.8727	28.6985	28.8671	28.3177	28.6202	28.6973	28.7715	28.6631
	0.682578	0.256808	tr|E1NZ78|E1NZ78_CANLF;tr|E2RK95|E2RK95_CANLF;tr|F1P8Q7|F1P8Q7_CANLF;tr|E1NZ77|E1NZ77_CANLF;tr|E1NZ80|E1NZ80_CANLF;tr|S5TIZ3|S5TIZ3_CANLF;tr|E1NZ76|E1NZ76_CANLF	tr|E1NZ78|E1NZ78_CANLF;tr|E2RK95|E2RK95_CANLF;tr|F1P8Q7|F1P8Q7_CANLF;tr|E1NZ77|E1NZ77_CANLF;tr|E1NZ80|E1NZ80_CANLF;tr|S5TIZ3|S5TIZ3_CANLF;tr|E1NZ76|E1NZ76_CANLF					5	5	5	5.9	5.9	5.9	150.09	0	19.399	1767600000	30	NaN	26.8701	26.5074	26.8935	NaN	26.895	26.6897	NaN	26.3797	NaN	NaN	NaN
	0.402248	0.0962879	tr|F6PMF3|F6PMF3_CANLF;tr|E2J870|E2J870_CANLF	tr|F6PMF3|F6PMF3_CANLF;tr|E2J870|E2J870_CANLF					7	7	7	15.8	15.8	15.8	81.464	0	99.057	3864800000	24	27.869	27.3011	27.6927	NaN	27.6646	27.5578	27.5319	27.4249	27.6711	27.5922	27.3835	NaN
	0.508729	0.317195	tr|E2QRQ8|E2QRQ8_CANLF	tr|E2QRQ8|E2QRQ8_CANLF					28	28	28	52.8	52.8	52.8	87.784	0	323.31	31727000000	456	29.8407	30.0052	29.958	30.6291	31.057	30.3779	29.3337	29.8729	29.7747	30.3687	30.6205	30.2836
	0.0726885	0.0213521	tr|E2QRR1|E2QRR1_CANLF	tr|E2QRR1|E2QRR1_CANLF					4	4	4	7.6	7.6	7.6	86.209	0	13.388	2368000000	25	NaN	26.8535	26.8954	NaN	27.1671	NaN	NaN	NaN	26.892	26.996	26.9639	26.9529
	0.627167	0.159107	tr|J9P440|J9P440_CANLF;tr|E2QRR5|E2QRR5_CANLF	tr|J9P440|J9P440_CANLF;tr|E2QRR5|E2QRR5_CANLF					34	34	34	51.2	51.2	51.2	73.817	0	323.31	93579000000	560	31.6278	31.657	31.5538	31.9974	31.9693	31.9888	31.4776	31.4945	31.6221	31.6151	31.9904	31.8595
	0.136263	0.189394	tr|E2QRS5|E2QRS5_CANLF	tr|E2QRS5|E2QRS5_CANLF					5	5	5	7.2	7.2	7.2	138.24	0	17.705	1009400000	37	NaN	25.7223	NaN	NaN	NaN	25.8265	NaN	24.5653	25.8546	26.006	25.9141	25.5348
	0.867653	0.282295	tr|E2QRT0|E2QRT0_CANLF;tr|J9P9L9|J9P9L9_CANLF;tr|J9NZR9|J9NZR9_CANLF	tr|E2QRT0|E2QRT0_CANLF					17	16	16	42.9	41	41	46.37	0	323.31	63736000000	259	31.7301	31.7502	31.5116	31.4905	31.4604	32.1197	31.5425	30.9152	31.2309	31.561	31.7243	31.4401
	0.891811	-0.348288	tr|E2QRU0|E2QRU0_CANLF;tr|J9P7N2|J9P7N2_CANLF	tr|E2QRU0|E2QRU0_CANLF					11	11	11	53	53	53	29.836	0	209.08	28211000000	195	30.6237	30.385	30.3497	29.756	29.738	29.7888	30.4824	30.6663	30.7698	30.1639	30.1934	29.9829
	0.0562639	0.0535526	tr|E2QRU4|E2QRU4_CANLF	tr|E2QRU4|E2QRU4_CANLF					5	5	5	29.2	29.2	29.2	28.563	0	60.899	1999200000	53	26.8451	25.8991	25.8395	27.5647	26.5004	27.2385	26.5798	26.8834	26.898	26.4427	26.1677	26.7887
	0.331682	-0.124589	tr|E2QRU5|E2QRU5_CANLF	tr|E2QRU5|E2QRU5_CANLF					6	6	6	26.5	26.5	26.5	17.626	0	26.956	12527000000	64	29.5998	29.1079	29.1555	28.6414	29.0651	29.1496	29.3202	29.4714	29.3067	29.2425	28.8816	29.5815
	0.361788	-0.0966555	tr|E2QRU9|E2QRU9_CANLF	tr|E2QRU9|E2QRU9_CANLF					23	23	23	48.3	48.3	48.3	71.635	0	323.31	32961000000	364	30.6863	30.6905	30.46	30.3716	30.2961	30.367	30.7664	30.6825	30.745	30.2667	30.4156	30.0222
	0.342323	0.229986	tr|E2QRV0|E2QRV0_CANLF	tr|E2QRV0|E2QRV0_CANLF					1	1	1	5.3	5.3	5.3	28.316	0.00035119	3.5962	1491500000	9	26.7102	25.8893	NaN	NaN	NaN	26.6798	26.3392	NaN	NaN	26.1171	26.133	NaN
	0.68669	-0.229686	tr|E2QRX1|E2QRX1_CANLF	tr|E2QRX1|E2QRX1_CANLF					13	13	13	21.1	21.1	21.1	91.706	0	323.31	33679000000	176	30.3045	30.2278	30.302	30.0213	30.0601	29.6553	30.5564	30.359	30.549	30.3687	29.7912	30.2271
	0.83916	-0.141075	tr|E2QRY4|E2QRY4_CANLF	tr|E2QRY4|E2QRY4_CANLF					9	9	9	12.9	12.9	12.9	108.9	0	323.31	22630000000	166	29.8852	29.7749	29.5402	29.7662	29.7696	29.7591	29.9201	29.9279	29.6067	29.8936	30.103	29.8095
	0.396273	-0.195144	tr|E2QRY7|E2QRY7_CANLF;tr|F6V6Y8|F6V6Y8_CANLF	tr|E2QRY7|E2QRY7_CANLF;tr|F6V6Y8|F6V6Y8_CANLF					11	11	11	49.6	49.6	49.6	26.121	0	42.726	10575000000	48	29.5108	28.7081	28.9162	28.8599	28.923	28.7016	29.7269	29.2542	29.263	28.7954	28.6192	29.1294
	0.108494	-0.0578973	tr|E2QS10|E2QS10_CANLF	tr|E2QS10|E2QS10_CANLF					3	3	3	17.8	17.8	17.8	19.891	0	7.6533	1575500000	9	NaN	26.1853	26.0554	26.9713	26.1164	26.524	NaN	26.3567	26.3279	26.5163	26.5128	NaN
	1.0707	0.342926	tr|E2QS13|E2QS13_CANLF	tr|E2QS13|E2QS13_CANLF					13	13	13	73.5	73.5	73.5	19.954	0	267.43	42992000000	255	30.6234	30.3834	30.782	31.2753	30.8637	31.2512	30.7545	30.3396	30.3229	30.6905	30.4936	30.4599
	0.118634	-0.0394082	tr|E2QS16|E2QS16_CANLF;tr|J9P6V3|J9P6V3_CANLF	tr|E2QS16|E2QS16_CANLF;tr|J9P6V3|J9P6V3_CANLF					6	6	6	20.3	20.3	20.3	41.413	0	174.83	11445000000	71	29.3221	29.2579	28.8573	29.1542	28.7806	29.0923	29.4307	29.1285	29.1058	28.9137	29.0053	28.8702
	1.46095	0.280788	tr|E2QXN0|E2QXN0_CANLF;tr|E2QS21|E2QS21_CANLF;tr|J9NUM2|J9NUM2_CANLF	tr|E2QXN0|E2QXN0_CANLF;tr|E2QS21|E2QS21_CANLF;tr|J9NUM2|J9NUM2_CANLF					10	10	10	48.1	48.1	48.1	34.7	0	270.96	19908000000	198	29.3641	29.5343	29.3558	29.808	29.7457	29.8754	29.3796	29.266	29.3903	29.4622	29.1673	30.0366
	0.297471	-0.0633011	tr|E2QS34|E2QS34_CANLF	tr|E2QS34|E2QS34_CANLF					37	37	37	33.2	33.2	33.2	132.81	0	323.31	139960000000	601	32.6955	32.5264	32.6557	32.2313	32.3596	32.3204	32.6099	32.5169	32.5396	32.4066	32.5676	32.2657
	2.59462	-0.150978	tr|E2QS43|E2QS43_CANLF	tr|E2QS43|E2QS43_CANLF					13	13	13	40.6	40.6	40.6	44.606	0	323.31	126070000000	290	32.2608	32.3684	32.2689	32.3441	32.3406	32.3869	32.4931	32.5192	32.5528	32.3714	32.4599	32.3823
	0.221838	0.133647	tr|E2QS77|E2QS77_CANLF	tr|E2QS77|E2QS77_CANLF					8	8	8	29	29	29	38.735	0	20.306	2011500000	34	26.392	27.0496	27.2015	26.4215	26.4242	26.3319	NaN	NaN	26.4386	26.324	26.7468	NaN
	0.784222	-0.729865	tr|E2QS94|E2QS94_CANLF;tr|F6USW0|F6USW0_CANLF	tr|E2QS94|E2QS94_CANLF					6	6	6	67.2	67.2	67.2	14.318	0	52.346	11671000000	75	29.3018	29.3046	28.9632	27.8841	27.6204	27.8519	29.3078	29.1351	29.2098	NaN	NaN	26.9936
	0.00363024	0.00412738	tr|E2QS97|E2QS97_CANLF	tr|E2QS97|E2QS97_CANLF					5	5	5	30.1	30.1	30.1	25.062	0	126.8	5728300000	81	26.9739	27.8313	28.3495	27.8976	28.9089	28.2428	28.0482	27.7064	27.2089	28.3388	28.847	28.1889
	0.313304	-0.0839494	tr|E2QSA1|E2QSA1_CANLF;tr|F6UTU8|F6UTU8_CANLF	tr|E2QSA1|E2QSA1_CANLF;tr|F6UTU8|F6UTU8_CANLF					10	10	10	31.4	31.4	31.4	51.256	0	200.64	15477000000	165	29.5723	29.5547	29.5377	29.2649	29.2295	29.4508	29.7434	29.6839	29.6126	29.2078	29.347	29.3051
	0.917435	-0.350391	tr|E2QSB5|E2QSB5_CANLF	tr|E2QSB5|E2QSB5_CANLF					5	5	5	28.4	28.4	28.4	34.699	0	49.397	2180800000	32	27.013	26.6426	26.8875	NaN	26.418	26.126	26.831	26.8553	26.9522	27.2328	NaN	NaN
	2.34261	-0.487074	tr|E2QSC8|E2QSC8_CANLF	tr|E2QSC8|E2QSC8_CANLF					4	4	4	20.3	20.3	20.3	25.802	0	198.26	18958000000	89	29.4382	29.2583	29.457	29.6956	29.652	29.7914	30.2824	29.8799	30.2802	29.7771	29.9596	29.5498
	0.448411	0.0559015	tr|E2QSE3|E2QSE3_CANLF	tr|E2QSE3|E2QSE3_CANLF					27	27	27	65.1	65.1	65.1	47.339	0	323.31	90010000000	470	32.0828	31.9492	31.9379	31.9075	32.0772	31.9552	31.8985	31.7665	31.9066	32.0644	32.0093	31.9118
	0.0340385	0.0269454	tr|E2QSF4|E2QSF4_CANLF;ENSEMBL:ENSBTAP00000025008;CON__ENSEMBL:ENSBTAP00000025008;tr|J9P716|J9P716_CANLF	tr|E2QSF4|E2QSF4_CANLF					26	5	4	62.4	16.4	16.4	49.67	0	241.78	126410000000	198	31.3718	32.4874	32.4315	32.9115	32.638	32.5473	31.9015	32.8601	32.3143	32.4698	32.3093	32.4732
	0.420161	0.243915	tr|E2QSF5|E2QSF5_CANLF	tr|E2QSF5|E2QSF5_CANLF					5	5	5	15.4	15.4	15.4	59.737	0	99.967	2622100000	60	NaN	26.5713	26.6476	26.8439	27.3014	26.9739	25.9494	26.387	26.5153	27.1185	27.1482	27.2333
	1.4214	-0.646875	tr|E2QSI2|E2QSI2_CANLF	tr|E2QSI2|E2QSI2_CANLF					6	6	6	37.9	37.9	37.9	26.543	0	8.0518	4660500000	19	28.081	27.2837	27.7689	27.6482	26.7894	27.4815	28.8448	28.0586	28.2663	27.7318	27.8768	27.5121
	1.02213	-0.167128	tr|E2QSQ5|E2QSQ5_CANLF	tr|E2QSQ5|E2QSQ5_CANLF					18	18	18	22.9	22.9	22.9	116.91	0	323.31	24058000000	154	29.8976	29.8976	29.9077	29.8447	29.7685	29.4686	29.9859	29.9701	30.1428	29.8747	29.8494	29.9651
	0.97282	-0.111214	tr|E2QSS3|E2QSS3_CANLF	tr|E2QSS3|E2QSS3_CANLF					22	22	22	45.7	45.7	45.7	69.287	0	171.51	26744000000	219	30.4313	30.1711	30.2687	30.2186	30.1634	30.2447	30.2689	30.4469	30.5052	30.2989	30.2844	30.42
	0.147447	0.0564212	tr|E2QSZ0|E2QSZ0_CANLF;tr|F6UPR4|F6UPR4_CANLF	tr|E2QSZ0|E2QSZ0_CANLF;tr|F6UPR4|F6UPR4_CANLF					15	15	15	45.2	45.2	45.2	51.877	0	323.31	41298000000	287	31.2401	30.734	30.7887	30.6766	30.6546	30.6578	30.3586	30.8842	30.5507	30.9567	30.9276	30.8136
	0.647994	-0.221115	tr|E2QSZ2|E2QSZ2_CANLF	tr|E2QSZ2|E2QSZ2_CANLF					6	6	6	28.6	28.6	28.6	35.063	0	50.66	3493700000	23	26.9193	NaN	26.6664	27.2926	27.2869	26.959	NaN	27.2443	NaN	27.1566	27.3371	27.4335
	0.00328471	-0.00226103	tr|E2QT37|E2QT37_CANLF	tr|E2QT37|E2QT37_CANLF					12	12	12	41.1	41.1	41.1	49.043	0	217.76	16909000000	186	29.6671	29.5552	29.5917	29.167	29.4521	29.1162	28.5293	29.7841	29.7389	29.6054	29.478	29.6415
	0.297743	-0.154999	tr|E2QT45|E2QT45_CANLF;tr|A0A0M5N7F2|A0A0M5N7F2_CANLF	tr|E2QT45|E2QT45_CANLF;tr|A0A0M5N7F2|A0A0M5N7F2_CANLF					3	3	3	8.6	8.6	8.6	62.664	0	7.3968	1018700000	20	26.5262	25.9322	NaN	25.9405	NaN	NaN	26.4143	26.1479	26.3017	NaN	NaN	26.2422
	0.772558	-0.319982	tr|E2QT63|E2QT63_CANLF	tr|E2QT63|E2QT63_CANLF					6	6	6	17.9	17.9	17.9	52.489	0	18.569	2800400000	27	NaN	27.0953	27.4076	26.6563	NaN	26.8735	27.5509	27.5917	27.4969	26.9483	27.0531	26.952
	0.737608	0.55076	tr|E2QT97|E2QT97_CANLF	tr|E2QT97|E2QT97_CANLF					6	5	5	41.1	32.4	32.4	21.418	0	126.02	13253000000	84	27.8005	29.4648	29.2643	29.8514	29.608	29.6112	28.0961	28.4386	29.0069	28.8176	29.2205	28.8004
	0.572938	-0.17327	tr|E2QTB7|E2QTB7_CANLF;tr|F6V322|F6V322_CANLF	tr|E2QTB7|E2QTB7_CANLF;tr|F6V322|F6V322_CANLF					12	12	12	26.6	26.6	26.6	56.79	0	282.12	38520000000	210	31.1849	30.5243	30.4023	30.477	30.4616	30.7213	31.0718	30.756	30.7355	30.677	30.769	30.4911
	1.29347	-0.499163	tr|E2QTC7|E2QTC7_CANLF	tr|E2QTC7|E2QTC7_CANLF					9	9	9	28.2	28.2	28.2	41.257	0	22.861	2502500000	31	26.3748	27.1429	26.5756	26.5719	26.6284	NaN	27.556	27.2724	27.4501	26.6231	26.8879	26.8775
	0.572301	0.105709	tr|E2QTE2|E2QTE2_CANLF	tr|E2QTE2|E2QTE2_CANLF					6	6	6	31.4	31.4	31.4	30.065	0	149.95	17441000000	67	29.4622	29.7993	29.3213	29.6096	29.6822	29.7066	29.5783	29.3254	29.4957	29.4828	29.5736	29.4164
	0.427391	-0.108971	tr|E2QTE3|E2QTE3_CANLF	tr|E2QTE3|E2QTE3_CANLF					9	9	9	35.9	35.9	35.9	32.601	0	238.28	59965000000	197	31.2145	31.5359	31.3426	31.1793	31.5387	31.3014	31.7045	31.1586	31.2812	31.6046	31.5563	31.459
	0.0887961	0.0433342	tr|E2QTG1|E2QTG1_CANLF;tr|F6V493|F6V493_CANLF	tr|E2QTG1|E2QTG1_CANLF;tr|F6V493|F6V493_CANLF					4	4	4	26.8	26.8	26.8	15.44	0	41.27	10330000000	96	28.6733	28.8014	29.215	28.5708	29.1958	28.6621	28.4504	28.6863	28.6953	28.9358	29.2808	28.8563
	0.126296	-0.0964543	tr|E2QTH4|E2QTH4_CANLF;tr|J9NX20|J9NX20_CANLF	tr|E2QTH4|E2QTH4_CANLF;tr|J9NX20|J9NX20_CANLF					6	6	6	28.5	28.5	28.5	46.617	0	61.46	4339000000	59	27.7796	NaN	28.2787	27.5441	NaN	27.4862	NaN	27.4895	NaN	27.8536	28.2628	NaN
	0.558194	0.254588	tr|E2QTK7|E2QTK7_CANLF;tr|J9NSL5|J9NSL5_CANLF	tr|E2QTK7|E2QTK7_CANLF;tr|J9NSL5|J9NSL5_CANLF					4	4	4	29.4	29.4	29.4	29.467	0	41.632	3230700000	62	NaN	26.8382	27.5887	27.0233	27.5145	26.9657	NaN	27.273	26.9528	26.9439	26.5562	27.1385
	0.284637	0.175076	tr|E2QTL3|E2QTL3_CANLF	tr|E2QTL3|E2QTL3_CANLF					5	5	5	34.9	34.9	34.9	16.895	0	197.82	28048000000	193	29.3715	29.6671	30.1145	30.0017	30.8236	30.3203	29.3617	29.9923	29.856	30.1919	29.9716	30.0651
	1.77492	-0.302924	tr|E2QTN0|E2QTN0_CANLF	tr|E2QTN0|E2QTN0_CANLF					33	33	28	44.5	44.5	38.3	109.75	0	323.31	36605000000	312	30.6308	30.3726	30.277	30.5064	30.5651	30.657	30.7068	30.8634	30.815	31.0802	30.5566	31.2359
	0.37576	0.135851	tr|E2QTP2|E2QTP2_CANLF	tr|E2QTP2|E2QTP2_CANLF					6	3	3	20.7	11.6	11.6	43.42	0	109.95	2293300000	33	26.7427	26.4529	NaN	26.9755	NaN	26.7686	26.4827	NaN	26.5038	26.8107	NaN	26.96
	0.155221	0.0378599	tr|E2QTP5|E2QTP5_CANLF	tr|E2QTP5|E2QTP5_CANLF					14	14	14	19.4	19.4	19.4	106.83	0	323.31	8588900000	111	28.6887	28.5822	28.6916	28.3708	28.5048	28.6323	28.5997	28.6032	28.7199	28.2166	28.5633	28.1048
	0.0761654	0.0338624	tr|E2QTP7|E2QTP7_CANLF	tr|E2QTP7|E2QTP7_CANLF					5	5	5	28.4	28.4	28.4	24.362	0	29.062	5929900000	49	28.427	27.7167	27.8748	28.5613	28.0042	28.4062	28.2889	28.0302	28.0958	28.2014	28.0394	28.4851
	0.3914	0.185464	tr|E2QTQ8|E2QTQ8_CANLF	tr|E2QTQ8|E2QTQ8_CANLF					6	6	6	22.7	22.7	22.7	49.932	0	41.753	4934300000	43	28.8256	27.9729	27.6077	27.7614	27.761	27.8622	27.9744	27.9028	27.8665	27.6358	27.5189	27.7218
	0.147123	-0.0938421	tr|E2QTS3|E2QTS3_CANLF;tr|F6UQJ5|F6UQJ5_CANLF;tr|F6UQI5|F6UQI5_CANLF	tr|E2QTS3|E2QTS3_CANLF;tr|F6UQJ5|F6UQJ5_CANLF;tr|F6UQI5|F6UQI5_CANLF					11	11	7	30.4	30.4	18.4	46.522	0	323.31	33751000000	174	30.9875	30.5788	30.6868	30.4665	29.8009	30.3194	31.0539	30.7488	30.7709	30.1894	30.0726	30.2388
	0.811546	0.273115	tr|E2RPT4|E2RPT4_CANLF;tr|E2QTT0|E2QTT0_CANLF	tr|E2RPT4|E2RPT4_CANLF;tr|E2QTT0|E2QTT0_CANLF					17	15	15	38.9	34.9	34.9	77.17	0	135.25	6423400000	139	28.3221	28.4809	28.5746	28.517	28.4729	27.9309	27.5841	28.3156	27.9437	28.4302	28.2762	28.2883
	1.43949	1.4396	tr|E2QTT8|E2QTT8_CANLF	tr|E2QTT8|E2QTT8_CANLF					5	5	5	80.3	80.3	80.3	8.4825	0	209.65	10127000000	75	NaN	NaN	29.5336	30.1567	28.9472	29.1169	NaN	27.0684	NaN	28.3275	28.6012	28.0366
	0.650195	0.288328	tr|E2QTV0|E2QTV0_CANLF	tr|E2QTV0|E2QTV0_CANLF					6	6	6	28.2	28.2	28.2	37.088	0	53.474	7223300000	65	28.8172	28.2185	27.9837	28.7051	28.2606	28.546	28.0861	28.2246	28.7429	27.5959	28.0182	28.0594
	0.0632525	-0.020676	tr|E2QTW8|E2QTW8_CANLF	tr|E2QTW8|E2QTW8_CANLF					17	17	16	24.6	24.6	22.7	104.03	0	300.6	17143000000	211	29.9624	29.4216	29.4036	29.5098	29.8578	29.456	29.5556	29.6679	29.5971	29.5141	29.778	29.6787
	0.0470462	0.0172634	tr|E2QU31|E2QU31_CANLF	tr|E2QU31|E2QU31_CANLF					14	14	14	32.3	32.3	32.3	57.472	0	195.06	15269000000	144	29.1057	28.6286	28.9574	29.3953	29.0724	29.2312	28.943	29.1646	28.9841	29.2234	28.924	29.797
	1.00949	-0.255505	tr|E2QU43|E2QU43_CANLF	tr|E2QU43|E2QU43_CANLF					4	4	4	9.1	9.1	9.1	74.291	0	17.941	993480000	16	26.1013	NaN	26.2645	NaN	NaN	NaN	26.4667	NaN	26.41	NaN	NaN	NaN
	0.526665	-0.0716947	tr|E2QU53|E2QU53_CANLF	tr|E2QU53|E2QU53_CANLF					28	28	28	52.1	52.1	52.1	66.443	0	323.31	169980000000	705	33.0591	32.8905	32.785	32.7193	32.8851	32.8594	32.9494	32.9436	32.7831	32.9684	33.046	32.8877
	0.553256	-0.136011	tr|E2RIA4|E2RIA4_CANLF;tr|E2QU79|E2QU79_CANLF	tr|E2RIA4|E2RIA4_CANLF;tr|E2QU79|E2QU79_CANLF					14	14	14	37.9	37.9	37.9	62.18	0	232.57	14036000000	171	29.3492	28.9403	29.4976	28.9572	29.3846	29.1572	29.2914	29.3692	29.3147	29.5663	29.2102	29.2776
	0.675476	0.124587	tr|E2QUB4|E2QUB4_CANLF;tr|E2QUB1|E2QUB1_CANLF;tr|E2QU92|E2QU92_CANLF;tr|E2QX25|E2QX25_CANLF	tr|E2QUB4|E2QUB4_CANLF;tr|E2QUB1|E2QUB1_CANLF;tr|E2QU92|E2QU92_CANLF					3	3	2	9.9	9.9	7.4	45.559	0	14.35	1020400000	21	NaN	25.6707	25.6064	25.8999	25.9984	25.894	25.6514	25.7951	25.6317	25.679	NaN	25.6452
	2.40227	-0.485753	tr|E2QU96|E2QU96_CANLF	tr|E2QU96|E2QU96_CANLF					5	5	5	15.1	15.1	15.1	37.476	0	99.612	9805200000	96	28.635	28.3623	28.7135	28.2709	28.3959	28.1987	28.9224	28.7981	28.8663	29.2745	28.7144	29.0929
	0.265042	0.111016	tr|E2QUA0|E2QUA0_CANLF	tr|E2QUA0|E2QUA0_CANLF					21	21	21	24.1	24.1	24.1	127.6	0	256.77	10270000000	102	28.7364	28.3854	28.5305	28.7705	29.1011	28.3764	28.4241	28.3351	28.466	29.0786	28.3914	28.9232
	0.108049	-0.0476402	tr|E2QUA5|E2QUA5_CANLF	tr|E2QUA5|E2QUA5_CANLF					5	5	5	21.9	21.9	21.9	23.804	0	98.993	5947200000	64	27.8934	28.3347	28.3667	27.8575	28.0854	27.9361	27.7068	28.2398	27.8666	28.3824	28.4374	28.0671
	0.333495	-0.148823	tr|E2QUA6|E2QUA6_CANLF	tr|E2QUA6|E2QUA6_CANLF					12	12	12	22.1	22.1	22.1	67.744	0	58.733	10066000000	97	29.0215	28.4249	28.9037	28.9849	28.1711	28.4581	29.0614	28.7152	29.0321	28.3906	28.8482	28.6668
	0.575195	0.0940535	tr|E2QUA8|E2QUA8_CANLF	tr|E2QUA8|E2QUA8_CANLF					11	11	11	50.9	50.9	50.9	19.575	0	121.36	148010000000	276	32.5531	32.7049	32.6491	32.508	32.7298	32.5734	32.3439	32.5829	32.3662	32.7484	32.5869	32.6405
	1.07645	0.169972	tr|E2QUB3|E2QUB3_CANLF	tr|E2QUB3|E2QUB3_CANLF					13	13	13	43.2	43.2	43.2	48.367	0	251.81	18063000000	165	29.5564	29.8012	29.7903	29.4895	29.5113	29.5898	29.4425	29.2527	29.4026	29.4969	29.6709	29.6445
	0.948256	-0.299533	tr|E2QUB6|E2QUB6_CANLF	tr|E2QUB6|E2QUB6_CANLF					7	5	5	18.7	15.3	15.3	68.215	0	61.525	1739700000	52	26.5862	26.4034	NaN	26.6043	26.5284	26.1247	NaN	27.0507	26.4698	26.5155	26.9597	26.4413
	0.374512	-0.114914	tr|E2QUB9|E2QUB9_CANLF;tr|F1PTM3|F1PTM3_CANLF	tr|E2QUB9|E2QUB9_CANLF;tr|F1PTM3|F1PTM3_CANLF					15	15	14	48.8	48.8	43.9	42.332	0	321.7	27777000000	200	29.9002	30.2307	29.9841	30.0893	30.5864	30.4143	30.1712	30.2379	30.174	30.4895	30.5062	30.4083
	0.17518	0.158126	tr|E2QUC4|E2QUC4_CANLF	tr|E2QUC4|E2QUC4_CANLF					8	8	8	11.5	11.5	11.5	166.46	0	90.693	1455800000	41	NaN	25.6446	NaN	25.9515	26.7383	25.8405	NaN	25.574	25.3537	26.4657	26.1489	26.9021
	0.356564	-0.133006	tr|E2QUC8|E2QUC8_CANLF;tr|F1PTP8|F1PTP8_CANLF	tr|E2QUC8|E2QUC8_CANLF;tr|F1PTP8|F1PTP8_CANLF					10	10	10	33.2	33.2	33.2	41.888	0	110.68	12889000000	136	29.3554	29.0027	28.5475	28.7682	29.1867	28.8973	29.2406	29.2748	29.2981	28.7795	28.8702	28.859
	0.493278	-0.178214	tr|E2QUD3|E2QUD3_CANLF	tr|E2QUD3|E2QUD3_CANLF					10	10	10	31.3	31.3	31.3	32.243	0	35.236	13677000000	89	29.4025	28.9303	28.9634	29.3537	29.3209	29.1738	29.8857	29.3425	28.899	29.4311	29.2865	29.5147
	0.436162	-0.109144	tr|E2QUD5|E2QUD5_CANLF	tr|E2QUD5|E2QUD5_CANLF					8	8	8	38.8	38.8	38.8	25.307	0	38.026	9403400000	92	28.8746	28.9282	28.5005	28.3692	28.8691	28.676	28.8497	28.7856	28.663	28.762	29.0001	28.8905
	0.199365	0.143711	tr|E2QUD6|E2QUD6_CANLF	tr|E2QUD6|E2QUD6_CANLF					8	8	8	17.2	17.2	17.2	86.864	0	110.56	3537800000	39	NaN	26.4893	26.517	27.2456	27.1082	27.069	26.2518	26.835	NaN	27.1396	NaN	26.9673
	0	0.412316	tr|J9P9R4|J9P9R4_CANLF;tr|E2QUE2|E2QUE2_CANLF	tr|J9P9R4|J9P9R4_CANLF;tr|E2QUE2|E2QUE2_CANLF					6	6	6	14	14	14	69.333	0	13.687	1643500000	16	NaN	25.7471	25.5958	25.3163	26.0232	25.8258	NaN	NaN	NaN	25.2893	NaN	25.8278
	0.349071	-0.14567	tr|J9P4M7|J9P4M7_CANLF;tr|E2QUE5|E2QUE5_CANLF	tr|J9P4M7|J9P4M7_CANLF;tr|E2QUE5|E2QUE5_CANLF					8	8	8	13.7	13.7	13.7	103.77	0	26.041	4064400000	44	27.8371	27.6848	27.6856	NaN	27.3001	27.5941	28.2469	27.7024	27.6781	NaN	27.4367	27.3833
	1.30542	-0.390769	tr|E2QUE7|E2QUE7_CANLF	tr|E2QUE7|E2QUE7_CANLF					6	6	6	33.1	33.1	33.1	17.258	0	115.37	41754000000	99	30.0229	30.6363	30.5045	30.7909	30.1344	30.6806	30.7711	30.9691	31.1741	30.5115	30.836	30.8269
	0.820986	-0.316963	tr|E2QUF8|E2QUF8_CANLF	tr|E2QUF8|E2QUF8_CANLF					7	7	7	20.2	20.2	20.2	62.427	0	146.6	13048000000	84	29.0989	29.0662	29.1884	29.047	28.6059	29.3498	28.8005	29.4309	29.2254	29.4783	29.9466	29.3144
	0.027407	0.00594514	tr|E2QUG9|E2QUG9_CANLF	tr|E2QUG9|E2QUG9_CANLF					16	16	16	21.4	21.4	21.4	103.95	0	155.12	17213000000	124	29.7241	29.373	29.385	29.732	29.5011	29.6509	29.5141	29.569	29.5951	29.5169	29.5803	29.5522
	0.203538	-0.0918914	tr|E2QUH1|E2QUH1_CANLF	tr|E2QUH1|E2QUH1_CANLF					16	16	16	23.2	23.2	23.2	122.72	0	283.12	27508000000	277	30.55	30.3715	30.4054	29.6638	30.0377	29.8248	30.4285	30.4325	30.2887	29.9629	30.0579	29.8131
	0.333382	0.214211	tr|E2QUH8|E2QUH8_CANLF	tr|E2QUH8|E2QUH8_CANLF					6	6	6	24.3	24.3	24.3	36.286	0	105.35	4035900000	68	26.4539	27.5455	27.5448	28.0457	27.8548	27.9308	26.911	27.4532	27.4583	27.4183	27.5012	27.6815
	0.575326	-0.114643	tr|E2QUI2|E2QUI2_CANLF;tr|E2QUK3|E2QUK3_CANLF	tr|E2QUI2|E2QUI2_CANLF;tr|E2QUK3|E2QUK3_CANLF					25	25	25	36.7	36.7	36.7	94.659	0	323.31	26944000000	288	30.5527	30.0037	30.0185	30.1917	30.2449	30.2089	30.3239	30.462	30.2918	30.2893	30.2232	30.2888
	0.0130533	0.00428829	tr|E2QUI5|E2QUI5_CANLF;tr|J9P6Y8|J9P6Y8_CANLF	tr|E2QUI5|E2QUI5_CANLF;tr|J9P6Y8|J9P6Y8_CANLF					10	9	9	11	10.4	10.4	197.01	0	100.31	5092500000	54	28.0751	27.6759	27.8348	28.0481	28.0976	27.8078	27.7653	27.792	27.7653	28.1579	28.1141	27.9192
	0.626931	-0.0552862	tr|E2QUI7|E2QUI7_CANLF	tr|E2QUI7|E2QUI7_CANLF					26	26	26	52.3	52.3	52.3	78.583	0	230.83	23811000000	226	29.9727	29.9639	29.9241	30.0465	30.0504	30.0016	29.9139	30.003	30.141	30.0628	30.1216	30.0803
	0.117888	0.0702264	tr|E2QUJ0|E2QUJ0_CANLF;tr|E2R8X7|E2R8X7_CANLF;tr|J9P6F3|J9P6F3_CANLF	tr|E2QUJ0|E2QUJ0_CANLF;tr|E2R8X7|E2R8X7_CANLF					20	20	20	18.9	18.9	18.9	161.82	0	182.33	8069800000	69	29.2929	28.9513	28.6879	28.4368	28.0939	28.3773	28.7208	28.7896	28.1606	28.3996	28.7782	27.9132
	1.80523	0.284602	tr|E2QUJ4|E2QUJ4_CANLF;tr|E2R7S0|E2R7S0_CANLF	tr|E2QUJ4|E2QUJ4_CANLF;tr|E2R7S0|E2R7S0_CANLF					15	15	15	74.9	74.9	74.9	26.24	0	261.32	39262000000	274	30.8413	30.6289	30.8653	30.3338	30.4898	30.5266	30.3574	30.2856	30.3221	30.394	30.2894	30.4548
	0.505466	-0.509812	tr|E2QUJ5|E2QUJ5_CANLF	tr|E2QUJ5|E2QUJ5_CANLF					3	3	3	9.5	9.5	9.5	44.423	0	6.8652	897990000	19	25.4713	25.6044	NaN	NaN	NaN	NaN	26.4223	NaN	NaN	NaN	25.673	NaN
	0	-0.638104	tr|E2QUK2|E2QUK2_CANLF	tr|E2QUK2|E2QUK2_CANLF					7	7	2	20.4	20.4	5	84.646	0	43.856	1732700000	35	NaN	NaN	NaN	NaN	27.0282	26.5928	NaN	NaN	NaN	27.4486	NaN	26.7358
	0.987724	-0.283267	tr|E2QUL2|E2QUL2_CANLF	tr|E2QUL2|E2QUL2_CANLF					5	5	5	40.6	40.6	40.6	11.548	0	164.17	83504000000	171	32.0239	31.3198	31.3035	31.8191	31.9022	31.5664	32.0234	31.7903	31.7037	32.0999	32.0781	31.7584
	0.832561	0.0893627	tr|E2QUL3|E2QUL3_CANLF	tr|E2QUL3|E2QUL3_CANLF					24	24	23	39.4	39.4	37.8	77.952	0	249.35	33047000000	300	30.5738	30.4166	30.354	30.5203	30.5211	30.5566	30.4265	30.4965	30.234	30.3935	30.4547	30.2617
	0.392221	0.1576	tr|E2QUP3|E2QUP3_CANLF	tr|E2QUP3|E2QUP3_CANLF					12	10	10	17.4	16	16	92.235	0	187.6	12243000000	136	29.5099	29.4739	29.7163	29.1593	28.7837	29.2496	29.323	29.0738	29.4783	29.1102	28.8038	29.1818
	0.38676	-0.136543	tr|E2QUP4|E2QUP4_CANLF	tr|E2QUP4|E2QUP4_CANLF					16	16	16	28	28	28	60.38	0	194.73	35090000000	173	30.9573	30.546	30.6597	30.2215	30.2922	30.2725	30.6771	30.6165	30.8668	30.722	30.258	30.6097
	0.954721	0.418405	tr|J9P881|J9P881_CANLF;tr|E2QUP6|E2QUP6_CANLF	tr|J9P881|J9P881_CANLF;tr|E2QUP6|E2QUP6_CANLF					5	5	5	7.9	7.9	7.9	115.35	0	47.248	2066200000	72	27.4545	26.6306	26.8039	NaN	26.9704	NaN	26.5135	26.7116	26.7866	26.1741	NaN	NaN
	0.137297	-0.101697	tr|E2QUQ5|E2QUQ5_CANLF	tr|E2QUQ5|E2QUQ5_CANLF					4	4	4	7.4	7.4	7.4	62.075	0	30.914	10652000000	30	NaN	29.1106	28.6014	28.4076	28.8372	29.079	29.276	28.4096	NaN	28.4876	29.4622	29.5506
	0.247374	0.150944	tr|E2QUQ8|E2QUQ8_CANLF;tr|J9P135|J9P135_CANLF;tr|J9NU08|J9NU08_CANLF	tr|E2QUQ8|E2QUQ8_CANLF;tr|J9P135|J9P135_CANLF;tr|J9NU08|J9NU08_CANLF					11	11	7	27	27	19.7	63.754	0	178.86	6383500000	85	27.5283	27.5168	27.5916	28.7077	27.8174	28.4558	27.7412	27.483	27.6668	28.1117	27.924	28.214
	0.321486	-0.10604	tr|E2QUR2|E2QUR2_CANLF	tr|E2QUR2|E2QUR2_CANLF					66	66	66	52.1	52.1	52.1	169.86	0	323.31	161590000000	1154	32.4179	32.414	32.2584	32.715	32.82	32.7089	32.3847	32.5786	32.538	32.7639	33.0435	32.8227
	1.56247	1.57626	tr|E2QUR7|E2QUR7_CANLF;tr|E2QUR6|E2QUR6_CANLF	tr|E2QUR7|E2QUR7_CANLF;tr|E2QUR6|E2QUR6_CANLF					4	4	4	11	11	11	61.73	0	46.357	18407000000	52	30.6313	29.2343	29.095	30.5833	29.2019	29.5538	NaN	26.6759	28.3273	28.0423	29.5159	29.0365
	0.0813579	-0.0288406	tr|E2QUR8|E2QUR8_CANLF	tr|E2QUR8|E2QUR8_CANLF					48	48	48	47.6	47.6	47.6	145.3	0	323.31	102820000000	578	31.9005	31.948	31.7535	31.8459	32.1787	31.9493	31.8038	31.7558	31.8873	32.4466	31.8973	32.4454
	0.752993	-0.377357	tr|E2QUS7|E2QUS7_CANLF;tr|E2QUR1|E2QUR1_CANLF	tr|E2QUS7|E2QUS7_CANLF;tr|E2QUR1|E2QUR1_CANLF					14	14	12	8.5	8.5	7.7	290.93	0	68.593	7759700000	46	NaN	27.7253	27.6384	28.3793	28.2322	28.5815	28.542	28.2154	27.9931	28.9828	28.7102	28.1699
	1.28209	-0.198441	tr|E2QUS9|E2QUS9_CANLF	tr|E2QUS9|E2QUS9_CANLF					10	10	3	74.5	74.5	21.6	10.928	0	117.63	351890000000	361	33.8182	33.9007	33.5488	33.8311	33.9831	33.8539	34.1836	33.9122	33.8298	34.0654	34.1144	34.076
	0.393343	-0.211758	tr|E2QUT2|E2QUT2_CANLF	tr|E2QUT2|E2QUT2_CANLF					3	3	3	12.7	12.7	12.7	42.481	0	67.938	10478000000	71	27.8932	28.5829	28.6931	28.5269	29.114	28.664	28.1571	28.9776	28.6275	29.0311	29.1607	29.1819
	1.49914	-0.229329	tr|E2QUT6|E2QUT6_CANLF	tr|E2QUT6|E2QUT6_CANLF					10	10	10	30.7	30.7	30.7	59.154	0	287.64	20379000000	154	29.7037	29.5472	29.6254	29.9288	29.4095	29.7073	29.8789	29.8233	30.0099	29.7385	29.9644	29.9272
	0.701232	-0.207767	tr|E2QUT9|E2QUT9_CANLF	tr|E2QUT9|E2QUT9_CANLF					12	12	12	36.2	36.2	36.2	35.613	0	71.209	15563000000	104	28.7747	29.4179	29.3654	29.1511	29.2042	28.976	29.1529	29.2394	29.1345	29.5616	29.6917	29.3851
	1.13789	-0.142966	tr|E2QUU0|E2QUU0_CANLF	tr|E2QUU0|E2QUU0_CANLF					54	54	54	39.4	39.4	39.4	227.52	0	323.31	44944000000	413	30.9407	30.7222	30.9144	31.1489	30.9071	30.9743	31.0324	31.0748	30.9648	31.1487	31.1671	30.9076
	0.00561164	0.00468146	tr|E2QUU1|E2QUU1_CANLF	tr|E2QUU1|E2QUU1_CANLF					11	11	11	39.8	39.8	39.8	29.136	0	85.661	13254000000	121	29.5252	29.485	29.3438	29.2427	28.319	28.7947	29.4765	29.3325	29.4671	28.4073	28.8852	28.267
	0.23175	-0.0768702	tr|E2QUU5|E2QUU5_CANLF	tr|E2QUU5|E2QUU5_CANLF					50	50	30	75.9	75.9	58.8	60.995	0	323.31	971330000000	2467	34.9497	35.1675	35.1517	35.3122	35.4735	35.3344	34.982	35.2392	35.1616	35.6516	35.5074	35.6395
	0.18876	-0.0361399	tr|E2QUV0|E2QUV0_CANLF;tr|J9NZL2|J9NZL2_CANLF;tr|J9P3A7|J9P3A7_CANLF;tr|J9P6G6|J9P6G6_CANLF	tr|E2QUV0|E2QUV0_CANLF;tr|J9NZL2|J9NZL2_CANLF;tr|J9P3A7|J9P3A7_CANLF;tr|J9P6G6|J9P6G6_CANLF					47	47	47	23.7	23.7	23.7	304.86	0	323.31	30404000000	387	30.6376	30.2333	30.5026	30.2923	30.3896	30.3552	30.3355	30.5889	30.4129	30.4079	30.4443	30.4086
	0.738213	0.184748	tr|E2QUV5|E2QUV5_CANLF	tr|E2QUV5|E2QUV5_CANLF					4	4	4	10.5	10.5	10.5	61.185	0	10.906	1449400000	33	NaN	26.2	26.7525	26.2063	26.2259	26.2694	26.2284	26.1572	26.117	25.9068	26.3208	NaN
	0.010533	0.00593338	tr|E2QUV8|E2QUV8_CANLF	tr|E2QUV8|E2QUV8_CANLF					8	8	8	31.2	31.2	31.2	32.62	0	323.31	52196000000	226	30.6172	30.7593	30.8312	31.598	31.3667	31.2937	30.8122	31.0437	31.0318	31.1739	31.2972	31.3856
	0.139678	-0.130713	tr|E2QUW7|E2QUW7_CANLF	tr|E2QUW7|E2QUW7_CANLF					7	7	7	18.1	18.1	18.1	70.231	0	36.511	1730900000	27	NaN	26.0664	NaN	NaN	26.9156	NaN	26.5916	26.2033	NaN	26.8802	26.8116	27.1345
	0.0414477	0.0194591	tr|E2QUX8|E2QUX8_CANLF	tr|E2QUX8|E2QUX8_CANLF					9	9	9	23.6	23.6	23.6	72.079	0	141.07	6452900000	66	28.8072	28.1628	28.4661	28.231	27.9439	28.2765	28.3774	28.3179	28.4122	27.8742	28.494	27.7341
	0.0388721	-0.0150862	tr|E2QUY7|E2QUY7_CANLF	tr|E2QUY7|E2QUY7_CANLF					19	19	19	49.3	49.3	49.3	60.966	0	216.57	62619000000	370	31.5433	31.3897	31.4001	31.0314	31.2307	30.9703	31.4111	31.3766	31.4332	30.8887	31.2705	30.9119
	0.022337	0.0200962	tr|E2QUZ0|E2QUZ0_CANLF	tr|E2QUZ0|E2QUZ0_CANLF					4	4	4	31.7	31.7	31.7	29.266	0	27.153	2858200000	34	27.9947	26.8566	27.2387	27.9878	26.7511	NaN	27.5216	27.3157	27.2988	NaN	27.2468	NaN
	0.582885	-0.127418	tr|E2QV06|E2QV06_CANLF	tr|E2QV06|E2QV06_CANLF					8	7	7	7.6	6.6	6.6	148.17	0	55.756	2573500000	29	26.9079	26.8102	27.2864	26.9059	27.1678	27.203	26.9322	27.3067	27.2594	27.1538	27.2193	27.1883
	0.360052	-0.0828227	tr|E2QV07|E2QV07_CANLF	tr|E2QV07|E2QV07_CANLF					59	59	59	50	50	50	143.22	0	323.31	156130000000	1023	33.0857	32.7655	32.7929	32.591	32.5916	32.5864	32.9266	32.8998	32.8833	32.6267	32.7555	32.6284
	0.539928	-0.166551	tr|E2QV08|E2QV08_CANLF;tr|F1Q1R1|F1Q1R1_CANLF	tr|E2QV08|E2QV08_CANLF;tr|F1Q1R1|F1Q1R1_CANLF					12	12	12	41.7	41.7	41.7	38.246	0	264.35	78560000000	179	31.3854	31.9709	31.6147	31.9671	31.3035	31.645	31.8712	31.9048	31.6266	31.6192	32.0498	31.4205
	0.248945	0.0671932	tr|E2QV12|E2QV12_CANLF	tr|E2QV12|E2QV12_CANLF					16	16	16	39.2	39.2	39.2	68.473	0	186.19	15668000000	187	29.597	29.243	29.3702	29.4412	29.0287	29.029	29.1313	29.2702	29.3403	29.0803	29.2661	29.0075
	1.07949	0.279831	tr|E2QV23|E2QV23_CANLF	tr|E2QV23|E2QV23_CANLF					3	3	3	12.9	12.9	12.9	37.74	0	111.03	2332100000	30	26.4974	27.0297	26.6858	27.0482	26.7854	27.1066	26.5234	26.229	26.5846	26.7135	26.8446	26.9664
	0.110297	0.0442537	tr|E2QV27|E2QV27_CANLF	tr|E2QV27|E2QV27_CANLF					19	19	19	26.4	26.4	26.4	70.497	0	211.94	114650000000	390	32.1598	32.4904	32.4231	31.8147	32.0518	31.9272	31.7794	32.1143	32.3008	32.0007	32.306	32.0788
	0.567621	-0.100123	tr|E2QV28|E2QV28_CANLF	tr|E2QV28|E2QV28_CANLF					8	8	8	51.1	51.1	51.1	16.203	0	323.31	23148000000	136	30.0788	29.9777	29.8012	30.1713	29.9394	30.1727	30.2639	29.9474	30.112	30.2497	30.0453	30.1765
	1.17962	-0.0841885	tr|E2QV33|E2QV33_CANLF	tr|E2QV33|E2QV33_CANLF					2	2	2	15.7	15.7	15.7	22.932	0	17.454	1637200000	24	25.9843	26.0542	25.9783	26.1306	25.9896	NaN	26.07	26.1501	26.1234	26.181	26.0335	26.2883
	0.612029	0.202695	tr|E2QV35|E2QV35_CANLF	tr|E2QV35|E2QV35_CANLF					10	10	7	39.1	39.1	30.6	40.794	0	211.24	12500000000	115	29.2921	29.5204	29.2038	29.5072	28.8942	29.0946	29.1674	29.2932	29.3121	28.8332	28.6409	28.6327
	0.139075	-0.0555672	tr|E2QV49|E2QV49_CANLF	tr|E2QV49|E2QV49_CANLF					4	4	4	43.7	43.7	43.7	8.2624	0	10.025	8124500000	72	28.0931	28.3918	28.431	28.3647	28.746	28.1556	28.1798	28.5662	28.0863	28.757	28.5069	28.8575
	0.280179	0.265718	tr|E2QV61|E2QV61_CANLF;tr|F1Q3Q2|F1Q3Q2_CANLF	tr|E2QV61|E2QV61_CANLF;tr|F1Q3Q2|F1Q3Q2_CANLF					9	9	9	25.9	25.9	25.9	39.134	0	177.87	305260000000	345	32.358	33.7824	33.7402	33.3339	33.9135	33.4078	32.0691	32.9085	33.08	34.0792	33.6477	33.8682
	0.0804991	-0.0313826	tr|E2QV77|E2QV77_CANLF	tr|E2QV77|E2QV77_CANLF					6	6	6	42.5	42.5	42.5	22.871	0	19.482	10687000000	76	28.8677	28.3494	28.8957	29.0895	28.8165	29.1082	28.6419	29.1091	28.8195	28.8843	28.9745	29.3281
	0.506895	-0.170219	tr|E2QV81|E2QV81_CANLF;tr|J9NZK8|J9NZK8_CANLF	tr|E2QV81|E2QV81_CANLF;tr|J9NZK8|J9NZK8_CANLF					6	6	6	37.7	37.7	37.7	24.961	0	131.68	3606400000	31	27.7655	NaN	27.1657	27.4709	27.2428	27.642	27.8892	27.4321	27.8965	27.4428	27.4773	27.4338
	0.463369	-0.362014	tr|E2QV84|E2QV84_CANLF	tr|E2QV84|E2QV84_CANLF					3	3	3	10.1	10.1	10.1	43.776	0	9.5134	870660000	25	25.4576	25.1362	25.4298	25.7245	24.6074	NaN	25.8915	25.3747	NaN	NaN	NaN	NaN
	0.245768	0.116486	tr|E2QV97|E2QV97_CANLF	tr|E2QV97|E2QV97_CANLF					11	11	11	26.5	26.5	26.5	64.222	0	246.6	9210400000	175	28.1107	28.7446	28.3944	29.079	28.4293	28.7522	28.1196	28.8868	28.4648	28.2547	28.6169	28.5082
	0.239949	-0.0803848	tr|E2QV99|E2QV99_CANLF;tr|F1PJA4|F1PJA4_CANLF;tr|J9P5Q0|J9P5Q0_CANLF	tr|E2QV99|E2QV99_CANLF					21	21	19	22.5	22.5	20.8	143.96	0	311.47	21269000000	183	30.1763	30.1016	29.6817	29.9573	29.6737	30.0561	30.1135	30.2839	30.1181	29.9512	29.6408	29.7675
	0.272758	-0.0824806	tr|E2QVB5|E2QVB5_CANLF;tr|J9P7U8|J9P7U8_CANLF	tr|E2QVB5|E2QVB5_CANLF;tr|J9P7U8|J9P7U8_CANLF					11	10	9	43.9	43.9	41.5	33.416	0	119.97	12170000000	122	29.2944	28.9426	29.4111	28.7355	28.8876	28.8581	29.0771	29.0426	29.1015	29.2741	29.0248	29.1462
	0.170172	-0.106591	tr|E2QVB8|E2QVB8_CANLF	tr|E2QVB8|E2QVB8_CANLF					7	7	7	35.1	35.1	35.1	33.5	0	121.4	14433000000	110	NaN	28.9564	29.1722	29.0347	29.3466	29.134	28.7605	29.0517	28.7644	29.7929	29.8073	29.7838
	0.992188	0.328448	tr|E2QVC0|E2QVC0_CANLF	tr|E2QVC0|E2QVC0_CANLF					6	6	6	27.7	27.7	27.7	28.465	0	95.47	5055700000	51	28.5635	28.0369	27.7434	28.2283	27.88	28.2736	28.2784	27.8294	27.7211	27.4803	27.6533	27.5692
	0.489676	0.103965	tr|E2QVF4|E2QVF4_CANLF	tr|E2QVF4|E2QVF4_CANLF					9	9	9	45	45	45	35.804	0	82.149	5086600000	54	27.8887	27.6181	27.986	27.7773	27.6105	27.8683	27.4521	27.9024	27.7563	27.5637	27.763	27.5464
	0.344287	0.13342	tr|E2QVF9|E2QVF9_CANLF;tr|J9P2U1|J9P2U1_CANLF	tr|E2QVF9|E2QVF9_CANLF					12	12	12	62.2	62.2	62.2	35.298	0	240.32	26922000000	136	30.1079	29.6021	29.5771	30.411	30.2066	30.3961	29.9768	29.8948	29.8905	29.9411	29.8805	29.9832
	0.0583733	0.0228894	tr|E2QVK0|E2QVK0_CANLF	tr|E2QVK0|E2QVK0_CANLF					18	18	18	53.9	53.9	53.9	48.55	0	238.81	47467000000	314	31.1532	31.0748	31.1452	31.02	30.7811	30.6696	31.1629	31.1477	31.048	30.5242	30.8726	30.7793
	1.08879	-0.303571	tr|E2QVK3|E2QVK3_CANLF	tr|E2QVK3|E2QVK3_CANLF					9	9	9	35.6	35.6	35.6	38.254	0	139.15	10937000000	81	28.9803	28.441	28.8417	28.6281	28.6942	28.6304	29.0958	28.9799	29.3456	29.1269	28.4828	28.8956
	0.31699	0.0759469	tr|E2QVM3|E2QVM3_CANLF	tr|E2QVM3|E2QVM3_CANLF					19	19	19	45	45	45	62.968	0	323.31	49725000000	378	31.1995	31.2186	30.9181	30.6664	31.1166	30.8722	30.7969	30.8824	30.9634	31.0048	30.9655	30.7038
	0.365754	0.0974016	tr|E2QVN6|E2QVN6_CANLF;tr|F1PPX8|F1PPX8_CANLF	tr|E2QVN6|E2QVN6_CANLF					13	13	13	54.2	54.2	54.2	33.854	0	177.61	23437000000	170	29.9604	30.0642	29.7398	29.8222	29.7096	29.5772	29.9559	29.7079	29.8959	29.4417	29.5729	29.9802
	0.0719771	-0.0315947	tr|E2QVP0|E2QVP0_CANLF	tr|E2QVP0|E2QVP0_CANLF					5	5	5	15.7	15.7	15.7	54.692	0	47.807	6973500000	65	28.0558	27.9917	27.8879	28.5317	28.2379	28.5808	28.2115	28.1009	28.0724	28.2077	28.6369	28.5281
	0.393561	0.0862705	tr|E2QVP4|E2QVP4_CANLF	tr|E2QVP4|E2QVP4_CANLF					13	13	13	49	49	49	27.402	0	323.31	57457000000	256	31.6025	31.3795	31.684	31.6	31.7539	31.5976	31.2714	31.6723	31.3275	31.6556	31.6565	31.462
	0.725101	0.131286	tr|E2QVP6|E2QVP6_CANLF	tr|E2QVP6|E2QVP6_CANLF					17	13	2	64.2	54.1	8.9	28.224	0	323.31	65841000000	341	31.204	31.4654	31.5976	31.6499	31.4666	31.3775	31.2331	31.2431	31.2709	31.3205	31.5767	31.072
	0.144047	-0.0755684	tr|E2QVU9|E2QVU9_CANLF	tr|E2QVU9|E2QVU9_CANLF					8	8	8	61.2	61.2	61.2	22.079	0	120.36	14726000000	116	29.3737	29.3646	29.3909	29.1262	28.8333	28.9097	29.0179	29.5443	29.7931	28.7653	29.0892	28.778
	0.518221	-0.238763	tr|E2QVV3|E2QVV3_CANLF	tr|E2QVV3|E2QVV3_CANLF					11	11	11	33.4	33.4	33.4	34.658	0	131.93	39989000000	147	31.0385	30.4824	30.9762	30.587	30.2354	30.4311	30.989	31.2735	31.1589	30.2859	30.6119	30.6099
	0.818635	-0.213107	tr|E2QVV4|E2QVV4_CANLF	tr|E2QVV4|E2QVV4_CANLF					5	5	5	26.9	26.9	26.9	23.066	0	15.845	8186400000	43	28.7173	28.5084	28.5983	28.0017	28.282	28.3637	28.7494	28.8335	28.5424	28.3719	28.6279	28.4389
	0.0817018	-0.0240479	tr|E2QVV7|E2QVV7_CANLF	tr|E2QVV7|E2QVV7_CANLF					14	14	14	47.3	47.3	47.3	41.806	0	118.84	11949000000	113	29.0201	28.6641	28.931	29.0523	29.1342	28.963	28.7018	29.0209	29.1577	28.8794	29.1642	29.3526
	0.319174	-0.0804606	tr|E2QW06|E2QW06_CANLF	tr|E2QW06|E2QW06_CANLF					17	17	17	48	48	48	28.806	0	323.31	308880000000	384	33.8186	33.5824	33.8659	33.5293	33.9334	33.6238	33.5936	33.8958	33.7915	34.0847	33.6645	34.1194
	1.28293	-0.216512	tr|E2QW07|E2QW07_CANLF;tr|F1PZP8|F1PZP8_CANLF	tr|E2QW07|E2QW07_CANLF;tr|F1PZP8|F1PZP8_CANLF					13	13	13	36.8	36.8	36.8	43.393	0	124.7	17646000000	175	29.6012	29.7369	29.2421	29.3212	29.5204	29.4552	29.7181	29.5058	29.6568	29.8525	29.7469	29.6905
	1.21579	-0.275803	tr|E2QW25|E2QW25_CANLF	tr|E2QW25|E2QW25_CANLF					5	5	5	27.7	27.7	27.7	23.975	0	136.24	10325000000	94	28.7344	28.5441	28.554	29.1542	28.8409	28.9003	28.7791	29.2698	29.019	29.1858	29.0653	29.0632
	0.398483	0.117905	tr|E2QW27|E2QW27_CANLF	tr|E2QW27|E2QW27_CANLF					21	21	21	38.8	38.8	38.8	66.659	0	208.62	35465000000	246	30.984	30.6592	30.5296	30.7843	30.2748	30.8132	30.7687	30.5863	30.6529	30.2993	30.4741	30.3058
	0.603998	-0.315662	tr|E2QW28|E2QW28_CANLF	tr|E2QW28|E2QW28_CANLF					4	4	4	5.7	5.7	5.7	97.055	0	18.901	1290400000	30	26.4004	NaN	26.0685	25.5276	NaN	26.2142	26.7652	NaN	26.4938	26.1286	26.0857	NaN
	0.187992	-0.0838069	tr|E2QW29|E2QW29_CANLF	tr|E2QW29|E2QW29_CANLF					4	4	4	47.7	47.7	47.7	12.438	0	52.498	2814300000	36	26.5392	27.2176	27.0406	27.2085	27.1049	27.3158	26.6402	27.4712	27.297	27.1376	27.2286	26.7773
	0.427509	-0.448653	tr|E2QW34|E2QW34_CANLF	tr|E2QW34|E2QW34_CANLF					5	5	5	24.9	24.9	24.9	22.781	0	29.171	7500700000	37	29.4847	28.6541	28.3747	27.4039	27.5023	27.9757	28.6922	28.4894	28.8621	NaN	NaN	NaN
	0.171938	0.0439555	tr|E2QW49|E2QW49_CANLF	tr|E2QW49|E2QW49_CANLF					24	24	24	70.8	70.8	70.8	43.802	0	323.31	69963000000	384	31.2066	31.5185	31.3135	31.4539	31.0612	31.3051	31.3988	31.2888	31.2854	30.9798	31.3764	31.1402
	1.70038	-0.240251	tr|E2QW54|E2QW54_CANLF;tr|E2RGH6|E2RGH6_CANLF	tr|E2QW54|E2QW54_CANLF					46	46	46	61.4	61.4	61.4	85.06	0	323.31	195650000000	865	33.1207	32.7741	32.7628	33.0992	33.0421	33.0773	33.2908	33.0818	33.1416	33.2815	33.3024	33.3047
	0.678687	-0.19335	tr|E2QW60|E2QW60_CANLF	tr|E2QW60|E2QW60_CANLF					18	18	18	45.4	45.4	45.4	58.059	0	323.31	65168000000	293	31.2847	31.3844	31.1739	30.956	31.3589	31.3625	31.1715	31.6642	31.0702	31.7248	31.603	31.767
	0.284168	-0.0646712	tr|E2QW69|E2QW69_CANLF	tr|E2QW69|E2QW69_CANLF					9	9	6	54	54	39.1	23.707	0	247.12	189030000000	255	32.9054	33.0003	32.7993	33.1141	32.9646	32.9678	32.6848	33.1843	33.2073	33.0103	33.0294	32.9851
	2.95903	0.970022	tr|E2QW76|E2QW76_CANLF	tr|E2QW76|E2QW76_CANLF					8	8	8	9.5	9.5	9.5	128.81	0	103.17	4156100000	54	27.9892	27.4466	28.3649	27.3654	27.6158	27.3111	26.7041	26.7354	26.6455	27.0335	26.4421	26.697
	0.222038	0.121132	tr|E2QW80|E2QW80_CANLF	tr|E2QW80|E2QW80_CANLF					9	9	9	18.7	18.7	18.7	82.502	0	112.8	4984000000	97	26.9622	27.8549	28.032	28.1835	28.145	28.006	27.4083	27.691	27.9531	27.8475	27.8142	27.7844
	0.0925559	-0.0352088	tr|E2QW92|E2QW92_CANLF;tr|J9PBL2|J9PBL2_CANLF;tr|J9NRX1|J9NRX1_CANLF;tr|J9P6P3|J9P6P3_CANLF	tr|E2QW92|E2QW92_CANLF;tr|J9PBL2|J9PBL2_CANLF					25	25	20	21.5	21.5	18.2	151.1	0	201.54	37389000000	260	30.9317	30.794	30.7364	30.6597	30.4205	30.5888	31.0859	30.7644	30.8118	30.2913	30.6653	30.3015
	0.18523	-0.0789784	tr|E2QWB2|E2QWB2_CANLF	tr|E2QWB2|E2QWB2_CANLF					26	23	23	53.9	48.3	48.3	70.37	0	323.31	63739000000	516	31.8679	31.3079	31.5445	31.3143	31.2658	31.2296	31.8816	31.3701	31.8026	31.1973	31.2516	31.2086
	2.21169	0.527036	tr|E2QWC5|E2QWC5_CANLF	tr|E2QWC5|E2QWC5_CANLF					7	2	2	20.7	6.3	6.3	47.944	0.00035625	3.9459	7224200000	32	28.3316	28.5965	28.3824	28.7619	28.414	28.952	27.7721	28.0267	27.8443	28.3078	28.2791	28.2952
	0.143807	-0.0405906	tr|E2QWC9|E2QWC9_CANLF	tr|E2QWC9|E2QWC9_CANLF					22	22	22	50.8	50.8	50.8	61.552	0	323.31	40018000000	367	30.5872	30.6762	30.6714	30.6733	31.0397	30.8796	30.5761	30.7952	30.6903	31.0901	30.824	30.9543
	0.453693	0.195043	tr|E2QWD3|E2QWD3_CANLF	tr|E2QWD3|E2QWD3_CANLF					8	8	8	30.9	30.9	30.9	42.069	0	69.317	8595000000	80	27.7011	28.419	28.2752	28.5098	28.2188	27.987	27.4801	28.3273	28.1854	27.7407	28.217	27.748
	0.20484	0.10474	tr|E2QWE0|E2QWE0_CANLF	tr|E2QWE0|E2QWE0_CANLF					9	9	9	37.7	37.7	37.7	37.564	0	65.077	8439800000	77	28.3527	28.6652	28.5226	28.267	27.9484	28.3954	28.8107	28.4058	28.2814	27.62	28.1512	NaN
	0.0285656	0.0235664	tr|E2QWE3|E2QWE3_CANLF	tr|E2QWE3|E2QWE3_CANLF					9	9	9	15.5	15.5	15.5	86.022	0	63.27	11047000000	110	29.3289	29.1489	28.989	28.4197	28.2028	28.2778	29.1633	28.7232	29.0658	28.0136	28.5554	28.5053
	0.0307085	-0.0173918	tr|E2QWF5|E2QWF5_CANLF	tr|E2QWF5|E2QWF5_CANLF					12	12	12	33.6	33.6	33.6	51.518	0	323.31	22358000000	106	30.0645	29.6125	30.0952	29.9646	29.3394	29.4185	29.8922	29.9276	30.0038	29.2217	29.7872	29.5068
	0.364572	0.235164	tr|J9NRJ3|J9NRJ3_CANLF;tr|L7N0B1|L7N0B1_CANLF;tr|J9PAP2|J9PAP2_CANLF;tr|J9P0U8|J9P0U8_CANLF;tr|H9GWG6|H9GWG6_CANLF;tr|F1PH35|F1PH35_CANLF;tr|E2R5M3|E2R5M3_CANLF;tr|E2QWF8|E2QWF8_CANLF;tr|L7N065|L7N065_CANLF;tr|L7N0I3|L7N0I3_CANLF;tr|J9NTE7|J9NTE7_CANLF;tr|E2QSD1|E2QSD1_CANLF;tr|E2RLG6|E2RLG6_CANLF;tr|L7N0H8|L7N0H8_CANLF;tr|E2QUM5|E2QUM5_CANLF	tr|J9NRJ3|J9NRJ3_CANLF;tr|L7N0B1|L7N0B1_CANLF;tr|J9PAP2|J9PAP2_CANLF;tr|J9P0U8|J9P0U8_CANLF;tr|H9GWG6|H9GWG6_CANLF;tr|F1PH35|F1PH35_CANLF;tr|E2R5M3|E2R5M3_CANLF;tr|E2QWF8|E2QWF8_CANLF;tr|L7N065|L7N065_CANLF;tr|L7N0I3|L7N0I3_CANLF;tr|J9NTE7|J9NTE7_CANLF					6	6	6	36.2	36.2	36.2	15.069	0	91.931	25261000000	125	29.0884	30.0647	29.4586	29.4874	29.7611	29.4025	28.5564	29.0675	29.1431	29.6365	30.1396	29.4862
	0.146088	0.0524723	tr|E2QWG6|E2QWG6_CANLF	tr|E2QWG6|E2QWG6_CANLF					11	11	11	15.6	15.6	15.6	124.44	0	22.66	2907300000	38	27.135	NaN	27.4784	27.6452	27.1776	27.0456	NaN	27.3104	27.0845	27.3272	27.2534	NaN
	0.493261	-0.188214	tr|E2QWG7|E2QWG7_CANLF	tr|E2QWG7|E2QWG7_CANLF					10	10	10	15.8	15.8	15.8	126.32	0	27.79	4946400000	38	28.248	27.9702	27.6585	27.7064	27.5497	27.5479	27.71	28.0347	27.9964	27.6494	28.451	28.0426
	0.814527	0.466234	tr|E2QWG8|E2QWG8_CANLF	tr|E2QWG8|E2QWG8_CANLF					6	6	6	28.1	28.1	28.1	42.502	0	112.53	4331100000	58	NaN	27.4843	28.3022	28.8944	27.6047	28.1934	27.6351	27.6725	27.5342	NaN	27.6766	NaN
	0.208503	0.0685143	tr|E2QWH0|E2QWH0_CANLF	tr|E2QWH0|E2QWH0_CANLF					8	8	8	43.4	43.4	43.4	24.094	0	38.699	5200600000	97	28.1419	27.9358	27.7205	27.4976	27.9374	27.5976	27.8338	27.7475	27.9885	27.5162	27.5971	27.6694
	0.405004	0.316236	tr|E2QWH7|E2QWH7_CANLF	tr|E2QWH7|E2QWH7_CANLF					4	4	4	17.3	17.3	17.3	38.246	0	52.964	1706700000	55	NaN	25.3786	26.3764	26.2215	26.8193	26.0438	24.8623	26.0857	25.8133	26.2345	26.2628	25.9573
	0.193109	-0.037746	tr|E2QWJ2|E2QWJ2_CANLF	tr|E2QWJ2|E2QWJ2_CANLF					35	35	35	58	58	58	83.09	0	323.31	38528000000	377	30.8807	30.4214	30.6337	30.808	30.604	30.6107	30.6736	30.7372	30.7805	30.684	30.6121	30.8358
	1.06172	-0.19025	tr|E2QWJ8|E2QWJ8_CANLF	tr|E2QWJ8|E2QWJ8_CANLF					9	9	9	75.2	75.2	75.2	17.785	0	264.17	27332000000	238	29.8164	29.8301	30.0948	30.2849	30.2468	30.0362	30.1602	30.2018	30.3281	30.3714	30.1476	30.3159
	0.606562	-0.138259	tr|E2QWK2|E2QWK2_CANLF	tr|E2QWK2|E2QWK2_CANLF					27	27	27	35.2	35.2	35.2	87.399	0	323.31	73911000000	525	31.62	31.4403	31.3012	31.5833	31.7161	31.6648	31.4152	31.7324	31.5395	31.9506	31.8251	32.0574
	1.46451	0.191336	tr|E2QWK3|E2QWK3_CANLF	tr|E2QWK3|E2QWK3_CANLF					10	10	10	37.2	37.2	37.2	38.361	0	109.49	34364000000	203	30.7995	30.5708	30.9482	30.6033	30.8131	30.7183	30.4962	30.5777	30.4503	30.7215	30.5086	30.6846
	0.00654337	-0.00322024	tr|E2QWK6|E2QWK6_CANLF;tr|F1PCG5|F1PCG5_CANLF	tr|E2QWK6|E2QWK6_CANLF;tr|F1PCG5|F1PCG5_CANLF					11	9	8	21.1	18	15.6	62.705	0	88.843	5414700000	50	27.9379	27.3161	27.3198	27.9972	27.8147	27.4591	27.7154	27.3509	27.5641	27.9616	27.6281	28.0623
	0.388752	0.0837502	tr|E2QWK8|E2QWK8_CANLF	tr|E2QWK8|E2QWK8_CANLF					9	9	9	45.5	45.5	45.5	21.188	0	171.62	13430000000	118	29.5304	29.3764	29.1298	29.1308	29.1944	29.2054	29.2125	29.2673	29.3184	28.9084	29.1807	28.7614
	0.273798	0.0555421	tr|E2QWL1|E2QWL1_CANLF;tr|E2R1C9|E2R1C9_CANLF;tr|E2QXQ9|E2QXQ9_CANLF	tr|E2QWL1|E2QWL1_CANLF					21	21	21	61.9	61.9	61.9	39.66	0	323.31	69598000000	407	31.3986	31.263	31.282	31.5563	31.658	31.4598	31.2848	31.2651	31.3585	31.5678	31.4276	31.5133
	0.672579	-0.261058	tr|E2QWM0|E2QWM0_CANLF	tr|E2QWM0|E2QWM0_CANLF					6	6	6	7.5	7.5	7.5	131.84	0	24.304	4045000000	38	27.7378	27.3876	27.4911	27.0834	27.364	26.8484	27.4714	NaN	27.77	27.2447	27.8331	27.4653
	0.313041	0.146287	tr|E2QWM2|E2QWM2_CANLF	tr|E2QWM2|E2QWM2_CANLF					2	2	2	4.5	4.5	4.5	56.508	0	5.0264	2680900000	19	27.9212	26.9611	27.5255	27.3332	NaN	27.3127	27.4285	27.4468	NaN	27.1409	27.0416	27.4086
	0.246668	0.116885	tr|E2QWM9|E2QWM9_CANLF	tr|E2QWM9|E2QWM9_CANLF					14	14	14	65	65	65	37.603	0	281.71	24814000000	167	30.3051	30.3914	30.3742	30.2513	29.7171	29.9044	30.1954	30.2384	30.4681	29.5921	29.7078	29.4501
	0.0613527	0.0490762	tr|E2QWN4|E2QWN4_CANLF	tr|E2QWN4|E2QWN4_CANLF					4	4	4	14.8	14.8	14.8	40.246	0	37.898	2068600000	13	26.8869	26.904	26.3351	26.8839	NaN	NaN	NaN	27.1531	NaN	26.2126	26.7446	26.2345
	0.469253	0.375379	tr|E2QWN9|E2QWN9_CANLF	tr|E2QWN9|E2QWN9_CANLF					2	2	2	21.2	21.2	21.2	15.28	0	16.876	681810000	28	NaN	NaN	25.2874	24.9215	25.8332	25.087	24.6171	NaN	NaN	25.1967	NaN	NaN
	0.582316	0.421755	tr|E2QWP1|E2QWP1_CANLF	tr|E2QWP1|E2QWP1_CANLF					5	5	5	21.2	21.2	21.2	46.245	0	25.695	2497800000	22	26.1588	27.4545	27.0323	27.2715	26.9846	27.1789	NaN	NaN	NaN	26.4848	26.6986	26.6079
	0.231098	0.0638156	tr|E2QWQ0|E2QWQ0_CANLF	tr|E2QWQ0|E2QWQ0_CANLF					6	6	6	35.5	35.5	35.5	30.129	0	95.626	11344000000	87	29.1946	28.9557	28.8709	28.9714	28.9647	28.8067	29.2311	28.8037	28.9994	28.5853	28.8647	28.6532
	0.99785	-0.314173	tr|J9NWM2|J9NWM2_CANLF;tr|F1PYJ0|F1PYJ0_CANLF;tr|E2QWQ1|E2QWQ1_CANLF;tr|J9P6E3|J9P6E3_CANLF;tr|F1PHD8|F1PHD8_CANLF;sp|P79145|CREM_CANLF	tr|J9NWM2|J9NWM2_CANLF;tr|F1PYJ0|F1PYJ0_CANLF;tr|E2QWQ1|E2QWQ1_CANLF					5	5	3	31.1	31.1	22.8	21.759	0	62.864	21956000000	101	30.3572	29.7891	29.8605	30.0697	29.3949	29.8952	30.2627	30.2368	30.5409	30.0926	29.91	29.9184
	0.0423961	0.0302754	tr|E2QWQ9|E2QWQ9_CANLF	tr|E2QWQ9|E2QWQ9_CANLF					6	6	6	22.2	22.2	22.2	38.162	0	97.679	10227000000	93	28.4094	28.9025	29.0829	29.3439	28.7242	29.0736	29.0496	29.3498	29.3556	28.3496	28.3578	28.777
	0.0626701	0.0208047	tr|E2QWR0|E2QWR0_CANLF	tr|E2QWR0|E2QWR0_CANLF					8	8	8	41.1	41.1	41.1	37.757	0	323.31	22898000000	146	30.1278	30.0702	29.92	30.0653	29.9258	30.1638	29.6223	30.3662	30.0373	29.952	30.1455	29.7851
	0.561015	0.341142	tr|E2QWR2|E2QWR2_CANLF;tr|J9P711|J9P711_CANLF;tr|J9NZP1|J9NZP1_CANLF	tr|E2QWR2|E2QWR2_CANLF;tr|J9P711|J9P711_CANLF;tr|J9NZP1|J9NZP1_CANLF					6	6	6	25.6	25.6	25.6	47.105	0	144.77	1785100000	54	NaN	NaN	26.4245	26.0565	26.8278	26.4698	25.4343	26.1556	25.7947	26.4751	26.6578	26.0033
	0.222713	-0.0947861	tr|E2QWR3|E2QWR3_CANLF	tr|E2QWR3|E2QWR3_CANLF					11	11	11	32.3	32.3	32.3	46.563	0	153.48	13846000000	80	29.1172	29.3201	28.6808	28.6532	29.2829	28.9398	29.1402	28.7676	29.0933	29.527	28.9409	29.5239
	0.890703	0.378039	tr|E2QWR5|E2QWR5_CANLF;tr|J9P9U3|J9P9U3_CANLF	tr|E2QWR5|E2QWR5_CANLF					7	7	7	21.5	21.5	21.5	56.293	0	42.892	2580900000	30	26.6879	26.7552	26.7774	27.01	26.924	27.3739	NaN	26.3209	NaN	26.7659	NaN	27.0377
	0.445943	-0.151052	tr|E2QWR7|E2QWR7_CANLF;tr|J9NWN3|J9NWN3_CANLF	tr|E2QWR7|E2QWR7_CANLF;tr|J9NWN3|J9NWN3_CANLF					5	5	5	24.1	24.1	24.1	19.428	0	14.098	3531700000	36	27.5895	27.6759	27.4403	27.5455	26.8928	27.4266	27.5542	27.6039	27.9233	27.2833	27.5328	27.6148
	0.283798	0.126147	tr|E2QWR9|E2QWR9_CANLF	tr|E2QWR9|E2QWR9_CANLF					13	13	11	10.4	10.4	9.3	208.83	0	65.165	3892400000	67	27.1719	26.9358	26.9283	27.3485	27.3447	27.0317	26.4518	27.2854	26.6676	27.2058	27.3926	27.628
	0.407441	-0.119887	tr|E2QWS2|E2QWS2_CANLF	tr|E2QWS2|E2QWS2_CANLF					8	8	8	35.4	35.4	35.4	26.762	0	128.84	17519000000	154	29.8559	29.9319	29.621	29.6852	29.2756	29.6936	29.8341	30.0061	29.7061	29.4869	29.9521	29.3811
	0	-0.382961	tr|E2QWS7|E2QWS7_CANLF	tr|E2QWS7|E2QWS7_CANLF					3	3	3	4.9	4.9	4.9	108.98	0	12.045	571350000	18	NaN	NaN	NaN	25.4109	NaN	25.2411	25.709	NaN	NaN	NaN	NaN	25.1777
	0.719863	0.108273	tr|E2QWT5|E2QWT5_CANLF;tr|E2QWT1|E2QWT1_CANLF	tr|E2QWT5|E2QWT5_CANLF;tr|E2QWT1|E2QWT1_CANLF					12	12	12	28.9	28.9	28.9	43.193	0	198.69	23852000000	152	29.8994	30.0092	29.683	29.8717	30.0701	29.8601	29.6131	29.7455	29.9031	29.8684	29.823	29.8761
	0.149655	-0.0945601	tr|E2QWT9|E2QWT9_CANLF;tr|E2QXL0|E2QXL0_CANLF	tr|E2QWT9|E2QWT9_CANLF;tr|E2QXL0|E2QXL0_CANLF					11	11	11	22	22	22	96.02	0	146.41	2576700000	30	26.3748	26.3356	NaN	26.9598	26.2657	26.8684	NaN	26.282	26.343	26.9023	27.0944	27.0166
	0.0363995	0.0150128	tr|E2QWU0|E2QWU0_CANLF	tr|E2QWU0|E2QWU0_CANLF					6	6	6	39.5	39.5	39.5	19.517	0	32.003	51684000000	92	31.5148	31.0718	31.1	31.5064	30.8647	31.4931	31.4284	31.005	31.1874	31.2087	31.3876	30.9461
	0.301277	0.103442	tr|E2QWU2|E2QWU2_CANLF	tr|E2QWU2|E2QWU2_CANLF					19	19	19	71	71	71	28.415	0	323.31	93028000000	432	32.2799	32.1712	32.2513	32.0853	31.8391	31.823	32.1837	31.9767	32.3173	31.6334	31.7465	31.4914
	0.675721	0.39317	tr|E2QWU3|E2QWU3_CANLF;tr|F6UP22|F6UP22_CANLF	tr|E2QWU3|E2QWU3_CANLF					9	9	9	49.7	49.7	49.7	33.359	0	237	13953000000	111	29.8986	28.4494	29.4061	29.4972	28.9322	29.561	28.8303	28.6653	28.3322	29.3801	29.2801	29.5479
	0.517437	-0.173716	tr|E2QWU7|E2QWU7_CANLF	tr|E2QWU7|E2QWU7_CANLF					10	10	10	51.5	51.5	51.5	25.422	0	323.31	54242000000	224	31.6188	30.7133	31.0444	30.7545	31.1888	30.886	31.2896	31.1721	31.3557	31.1631	31.0596	31.2055
	0.437062	-0.149165	tr|E2QWV0|E2QWV0_CANLF;tr|J9NZH0|J9NZH0_CANLF;tr|F6XTU7|F6XTU7_CANLF	tr|E2QWV0|E2QWV0_CANLF					48	48	48	49.5	49.5	49.5	122	0	323.31	113180000000	778	32.7207	32.4958	32.4631	31.9902	31.9276	32.0589	32.5297	32.5393	32.4844	32.2404	32.3323	32.1964
	0.247539	-0.186271	tr|E2QWX5|E2QWX5_CANLF	tr|E2QWX5|E2QWX5_CANLF					4	4	4	26.7	26.7	26.7	20.318	0	12.039	2907500000	32	27.2272	26.7872	NaN	NaN	27.2406	27.0147	27.1359	NaN	26.6745	28.0481	27.1563	28.1763
	0.280579	-0.0713654	tr|E2QWY5|E2QWY5_CANLF	tr|E2QWY5|E2QWY5_CANLF					11	11	11	54.5	54.5	54.5	20.934	0	260.25	53441000000	204	31.4221	31.2005	30.8104	31.1272	31.4101	31.0569	31.1453	31.3214	31.222	31.2911	31.2329	31.3536
	0.353627	-0.150709	tr|E2QWY6|E2QWY6_CANLF;tr|J9P0D3|J9P0D3_CANLF;tr|E2QWF1|E2QWF1_CANLF;tr|J9PAX1|J9PAX1_CANLF	tr|E2QWY6|E2QWY6_CANLF					10	10	10	38.2	38.2	38.2	31.249	0	132.21	83735000000	265	31.6998	31.6956	31.6912	32.077	31.1509	31.3959	31.6519	32.0526	32.0299	31.3145	31.7966	31.3751
	0.0852354	0.0146822	tr|E2QWZ9|E2QWZ9_CANLF	tr|E2QWZ9|E2QWZ9_CANLF					4	4	4	24.5	24.5	24.5	21.155	0	160.77	8213500000	96	28.5963	28.7756	28.7789	28.592	28.6665	28.6761	28.8426	28.5254	28.5641	28.7211	28.6778	28.6634
	0.758332	0.270719	tr|E2QX07|E2QX07_CANLF	tr|E2QX07|E2QX07_CANLF					11	11	11	25.9	25.9	25.9	65.747	0	179.13	7643900000	101	28.1915	28.065	28.0487	27.9676	27.9547	NaN	27.8501	27.2914	27.5304	28.3376	27.8644	27.2261
	0.174469	0.20035	tr|E2QX13|E2QX13_CANLF	tr|E2QX13|E2QX13_CANLF					5	5	5	21.5	21.5	21.5	46.384	0	60.86	1355100000	54	25.9137	24.6518	25.942	26.4129	26.7601	26.1996	NaN	25.5321	25.6576	NaN	26.1493	25.6563
	0.0726326	-0.0269964	tr|E2QX15|E2QX15_CANLF	tr|E2QX15|E2QX15_CANLF					20	20	2	44.4	44.4	6.6	53.182	0	323.31	58393000000	284	31.6536	31.5109	31.3435	31.4386	31.147	31.1748	31.6817	31.4272	31.5785	31.035	31.303	30.9414
	0.166754	-0.195275	tr|E2QX17|E2QX17_CANLF;tr|J9NTB8|J9NTB8_CANLF	tr|E2QX17|E2QX17_CANLF					8	8	8	52.7	52.7	52.7	22.979	0	111.38	9331000000	60	28.8472	29.2908	29.0896	28.7417	27.4145	28.2193	28.8423	29.0571	29.5259	NaN	27.7579	NaN
	0.847742	0.231349	tr|E2QX20|E2QX20_CANLF	tr|E2QX20|E2QX20_CANLF					14	14	14	53.7	53.7	53.7	43.682	0	161.27	19150000000	202	30.2024	29.9716	30.1407	29.6723	29.7651	29.7895	30.0894	29.6435	29.7941	29.4983	29.436	29.3545
	0.218199	0.129588	tr|E2QX33|E2QX33_CANLF	tr|E2QX33|E2QX33_CANLF					10	10	10	18.2	18.2	18.2	104.23	0	103.77	3489400000	70	26.8848	26.9899	27.0231	27.507	27.9682	27.3353	26.9654	27.3603	26.9906	27.7221	26.7371	28.0538
	0.780872	0.769424	tr|E2QX37|E2QX37_CANLF	tr|E2QX37|E2QX37_CANLF					3	3	3	12.9	12.9	12.9	67.44	0	31.798	705940000	49	25.4113	NaN	NaN	NaN	26.151	25.9452	NaN	NaN	24.6487	25.4841	NaN	NaN
	1.46089	-0.288967	tr|E2QX45|E2QX45_CANLF	tr|E2QX45|E2QX45_CANLF					11	11	11	21.9	21.9	21.9	78.564	0	173.61	7789500000	85	28.3725	28.0524	28.1095	28.1881	28.3429	28.2559	28.6273	28.285	28.2054	28.6435	28.7847	28.4556
	0.0846457	-0.0240318	tr|E2QX49|E2QX49_CANLF;tr|F1PWW9|F1PWW9_CANLF	tr|E2QX49|E2QX49_CANLF;tr|F1PWW9|F1PWW9_CANLF					26	26	26	32.1	32.1	32.1	133.74	0	278.6	35445000000	274	31.1421	30.8062	30.8766	30.6831	30.627	30.6952	31.0443	30.8086	30.8547	30.6243	30.8134	30.7127
	1.16157	0.55303	tr|E2QX53|E2QX53_CANLF	tr|E2QX53|E2QX53_CANLF					5	5	4	31.1	31.1	27	32.603	0	67.498	5272800000	43	NaN	28.0492	27.6365	NaN	27.2305	27.8824	26.7498	27.5642	NaN	26.9979	27.2745	NaN
	0.338566	-0.176354	tr|E2QX57|E2QX57_CANLF;tr|F1P7Z9|F1P7Z9_CANLF	tr|E2QX57|E2QX57_CANLF;tr|F1P7Z9|F1P7Z9_CANLF					10	10	10	20.7	20.7	20.7	88.279	0	323.31	11543000000	124	28.9381	29.1727	29.5532	28.4231	28.52	28.5695	29.0145	29.3819	29.2317	28.7051	28.8624	28.795
	0.151152	-0.155955	tr|E2QX71|E2QX71_CANLF	tr|E2QX71|E2QX71_CANLF					7	7	7	9.5	9.5	9.5	155.46	0	36.206	1443900000	38	25.6083	NaN	26.7383	26.525	26.1509	NaN	NaN	26.2463	NaN	NaN	26.5769	26.5198
	0.607409	-0.186801	tr|E2QX84|E2QX84_CANLF	tr|E2QX84|E2QX84_CANLF					25	11	9	41.4	24.2	21.2	69.883	0	32.351	10152000000	99	28.9046	28.4827	28.1803	28.8991	28.7461	28.9	28.9491	28.6081	28.8502	29.079	28.8749	29.2743
	1.20759	-0.225887	tr|E2QX85|E2QX85_CANLF;tr|E2QX86|E2QX86_CANLF	tr|E2QX85|E2QX85_CANLF;tr|E2QX86|E2QX86_CANLF					12	11	11	37.8	35.9	35.9	42.782	0	262.13	43263000000	197	30.9123	30.9744	30.7831	30.6835	30.6997	30.6754	31.228	31.0349	31.1967	30.9222	30.6879	31.0274
	0.00658889	-0.00203247	tr|E2QX93|E2QX93_CANLF	tr|E2QX93|E2QX93_CANLF					20	20	20	26.6	26.6	26.6	132.95	0	234.28	13220000000	197	29.3479	29.2321	28.9441	29.1766	29.2807	28.8902	29.3421	29.2412	29.08	29.1368	28.9364	29.1111
	0.851781	0.283174	tr|E2QXA2|E2QXA2_CANLF;tr|J9NVX0|J9NVX0_CANLF	tr|E2QXA2|E2QXA2_CANLF;tr|J9NVX0|J9NVX0_CANLF					10	10	10	20.7	20.7	20.7	67.973	0	38.619	9503200000	107	28.0156	28.8783	28.7653	28.8646	29.0642	28.7839	28.4219	28.2071	28.5859	28.5479	28.4644	28.4324
	1.03601	-0.147533	tr|E2QXA3|E2QXA3_CANLF;tr|J9P0B6|J9P0B6_CANLF	tr|E2QXA3|E2QXA3_CANLF;tr|J9P0B6|J9P0B6_CANLF					38	38	38	60.1	60.1	60.1	74.04	0	323.31	190190000000	937	32.9645	33.054	33.0846	32.8517	32.9269	32.8489	33.1738	33.1453	33.308	32.9645	32.9215	33.0563
	0.211846	0.149733	tr|E2QXA5|E2QXA5_CANLF;P21752;CON__P21752	tr|E2QXA5|E2QXA5_CANLF					3	3	3	63.6	63.6	63.6	5.0256	0	46.492	56374000000	84	30.7836	31.0833	30.7889	31.4355	31.3559	31.0697	31.0067	29.9228	30.8141	31.355	31.5835	31.4531
	0.725297	0.201408	tr|E2QXA6|E2QXA6_CANLF;tr|F1PX12|F1PX12_CANLF	tr|E2QXA6|E2QXA6_CANLF;tr|F1PX12|F1PX12_CANLF					16	16	16	34.3	34.3	34.3	83.746	0	323.31	15433000000	144	28.8592	29.0308	29.1694	29.5678	29.5377	29.334	28.8501	29.1714	28.9328	29.2033	29.0845	29.0553
	1.57024	-0.16906	tr|E2QXB5|E2QXB5_CANLF	tr|E2QXB5|E2QXB5_CANLF					22	22	22	46	46	46	78.962	0	323.31	29946000000	280	30.52	30.3559	30.3818	30.3963	30.1462	30.4573	30.5632	30.5771	30.6198	30.4329	30.5335	30.418
	1.69889	0.292677	tr|E2QXB6|E2QXB6_CANLF	tr|E2QXB6|E2QXB6_CANLF					10	10	10	38.2	38.2	38.2	32.643	0	162.47	20515000000	120	30.1237	30.155	30.1536	29.8848	30.0475	29.9372	29.5058	29.764	29.5682	29.9365	30.0137	29.6328
	0.396602	-0.174124	tr|E2QY25|E2QY25_CANLF;tr|E2QXC0|E2QXC0_CANLF	tr|E2QY25|E2QY25_CANLF;tr|E2QXC0|E2QXC0_CANLF					10	10	10	10.9	10.9	10.9	159.25	0	50.389	2946300000	35	26.7728	26.9659	26.339	NaN	26.7192	27.0816	27.0128	NaN	26.7079	NaN	27.1288	27.0754
	0.0485968	-0.0111956	tr|E2QXC6|E2QXC6_CANLF;tr|F1P6N7|F1P6N7_CANLF;tr|F1P737|F1P737_CANLF	tr|E2QXC6|E2QXC6_CANLF;tr|F1P6N7|F1P6N7_CANLF					11	11	10	55.2	55.2	46.4	20.811	0	323.31	141370000000	326	32.5488	32.8486	32.5801	32.3445	32.4911	32.4492	32.6486	32.5036	32.6056	32.4986	32.5181	32.5175
	0.226044	-0.162111	tr|E2QXD1|E2QXD1_CANLF	tr|E2QXD1|E2QXD1_CANLF					9	9	9	22.5	22.5	22.5	52.567	0	112.69	8765300000	95	28.3914	28.9116	28.7741	28.2126	27.5983	28.2533	29.1556	28.8958	28.2671	27.8887	28.3878	28.3897
	0.467067	0.135567	tr|E2QXD6|E2QXD6_CANLF	tr|E2QXD6|E2QXD6_CANLF					12	12	12	31.5	31.5	31.5	53.19	0	158.36	16643000000	166	29.6504	29.6886	29.7604	29.6401	29.2846	29.3799	29.7617	29.5474	29.5125	29.1647	29.1725	29.0543
	1.87766	0.586359	tr|E2QXE0|E2QXE0_CANLF;sp|Q8MJ46|PP1G_CANLF	tr|E2QXE0|E2QXE0_CANLF;sp|Q8MJ46|PP1G_CANLF					17	4	4	54	16.9	16.9	38.548	0	154.01	25638000000	66	30.0794	30.1737	30.9241	30.9012	30.1881	30.7818	29.8923	29.9843	29.9376	30.1045	29.6898	29.4987
	0.135202	-0.0484683	tr|E2QXE3|E2QXE3_CANLF	tr|E2QXE3|E2QXE3_CANLF					5	5	5	6.9	6.9	6.9	96.906	0	27.525	3160700000	25	27.2588	27.076	27.2007	27.4108	26.9155	27.4762	27.6107	27.274	27.0033	27.403	27.0664	27.2611
	0.148017	-0.137802	tr|E2QXF0|E2QXF0_CANLF;tr|W0S257|W0S257_CANLF;tr|J9NX36|J9NX36_CANLF;tr|E2QXC4|E2QXC4_CANLF	tr|E2QXF0|E2QXF0_CANLF					9	9	9	45.5	45.5	45.5	29.669	0	204.24	33413000000	188	29.481	29.8265	29.6723	30.5233	30.7122	30.6873	29.5534	29.9054	30.0487	30.995	30.9387	30.9373
	0.0677851	-0.0686904	tr|E2QXF2|E2QXF2_CANLF	tr|E2QXF2|E2QXF2_CANLF					3	3	3	12	12	12	49.456	0	111.35	4080000000	56	26.3998	27.9648	28.2212	27.5522	28.2999	27.946	27.3232	27.6087	27.5348	28.0898	28.4403	27.8348
	0.727021	-0.135987	tr|E2QXG1|E2QXG1_CANLF	tr|E2QXG1|E2QXG1_CANLF					14	14	14	29.6	29.6	29.6	82.737	0	323.31	29008000000	174	30.3359	30.4411	30.261	30.0041	30.4369	30.102	30.2884	30.3483	30.5648	30.2966	30.4993	30.358
	0.428892	-0.0679001	tr|E2QXH2|E2QXH2_CANLF	tr|E2QXH2|E2QXH2_CANLF					18	17	17	48.2	48	48	58.425	0	323.31	92935000000	420	31.9022	31.851	31.8651	31.7496	31.7017	31.7361	31.9375	31.8338	32.081	31.8288	31.6631	31.8064
	0.572049	-0.161845	tr|E2QXH3|E2QXH3_CANLF	tr|E2QXH3|E2QXH3_CANLF					7	7	7	28.5	28.5	28.5	52.315	0	70.612	6203700000	81	28.243	27.9886	27.8028	28.2366	27.7968	28.1969	28.2809	27.8943	28.1142	28.1784	28.5619	28.3956
	0.833171	0.136094	tr|E2QXI3|E2QXI3_CANLF;tr|F1Q286|F1Q286_CANLF	tr|E2QXI3|E2QXI3_CANLF					21	21	21	71	71	71	35.377	0	323.31	74365000000	372	31.4372	31.4114	31.3226	31.6339	31.686	31.6067	31.2225	31.3078	31.4072	31.3739	31.5897	31.3647
	0.548438	-0.286593	tr|E2QXI6|E2QXI6_CANLF	tr|E2QXI6|E2QXI6_CANLF					11	11	11	29	29	29	45.695	0	127.93	7882700000	88	28.2373	27.907	28.7996	28.9365	28.0949	28.0363	28.9797	28.269	28.6976	29.0097	28.1534	28.4056
	0.644964	-0.132396	tr|E2QXJ5|E2QXJ5_CANLF	tr|E2QXJ5|E2QXJ5_CANLF					15	15	15	23.3	23.3	23.3	93.07	0	323.31	27748000000	195	30.2248	30.167	29.9375	30.2912	30.414	30.19	30.3665	30.1343	30.1791	30.571	30.4314	30.3696
	0	-0.236799	tr|J9P2V1|J9P2V1_CANLF;tr|E2QXK1|E2QXK1_CANLF;tr|F1Q1X7|F1Q1X7_CANLF;tr|F1Q1X1|F1Q1X1_CANLF;tr|B6VCV6|B6VCV6_CANLF;tr|F1Q334|F1Q334_CANLF;tr|E2RRW8|E2RRW8_CANLF;tr|F1PYV9|F1PYV9_CANLF;tr|F1PX33|F1PX33_CANLF	tr|J9P2V1|J9P2V1_CANLF;tr|E2QXK1|E2QXK1_CANLF;tr|F1Q1X7|F1Q1X7_CANLF;tr|F1Q1X1|F1Q1X1_CANLF					3	3	3	8.2	8.2	8.2	53.262	0	8.0816	1501800000	17	NaN	NaN	26.2471	26.0088	25.6305	25.9268	NaN	NaN	NaN	NaN	26.1901	25.9924
	0.590555	-0.232889	tr|F1Q317|F1Q317_CANLF;tr|E5Q8W9|E5Q8W9_CANLF;tr|E2QXK6|E2QXK6_CANLF;tr|Q6QZP2|Q6QZP2_CANLF	tr|F1Q317|F1Q317_CANLF;tr|E5Q8W9|E5Q8W9_CANLF;tr|E2QXK6|E2QXK6_CANLF;tr|Q6QZP2|Q6QZP2_CANLF					7	7	7	26.9	26.9	26.9	35.995	0	22.02	7008400000	78	28.8968	27.98	28.2981	28.5274	27.8256	28.2173	28.71	28.7166	28.5711	28.3331	28.2882	28.6852
	1.13773	0.373824	tr|E2QXM6|E2QXM6_CANLF;tr|F1PT28|F1PT28_CANLF;tr|F1PT27|F1PT27_CANLF	tr|E2QXM6|E2QXM6_CANLF;tr|F1PT28|F1PT28_CANLF;tr|F1PT27|F1PT27_CANLF					10	10	10	17.5	17.5	17.5	75.509	0	65.47	6068000000	95	27.9732	27.8746	28.244	28.5987	28.235	28.3994	28.1039	27.9995	28.1435	27.6503	27.3379	27.9049
	0.576969	-0.160837	tr|E2QXN8|E2QXN8_CANLF	tr|E2QXN8|E2QXN8_CANLF					11	11	10	25.7	25.7	24	54.429	0	299.92	11368000000	98	28.7761	29.3876	28.9296	28.8171	28.5894	28.6709	28.9544	29.2008	29.0505	28.9264	28.9811	28.2323
	2.0297	0.691225	tr|E2QXN9|E2QXN9_CANLF;tr|J9P469|J9P469_CANLF;tr|J9P7X3|J9P7X3_CANLF	tr|E2QXN9|E2QXN9_CANLF;tr|J9P469|J9P469_CANLF					11	11	11	34.9	34.9	34.9	60.098	0	124.24	7413700000	69	27.921	28.3595	28.145	28.3433	28.7059	28.2053	27.7725	27.447	28.1519	26.9835	27.5889	27.106
	0.227971	0.104267	tr|E2QXP1|E2QXP1_CANLF	tr|E2QXP1|E2QXP1_CANLF					5	5	5	17	17	17	51.134	0	42.181	2064800000	53	26.4075	26.1965	26.1604	26.7909	26.8956	26.6703	26.6026	26.2998	26.6242	26.6288	25.9243	26.3574
	0.221865	-0.104582	tr|E2QXP3|E2QXP3_CANLF	tr|E2QXP3|E2QXP3_CANLF					18	18	18	38	38	38	72.265	0	323.31	28019000000	196	30.0612	30.2042	30.1171	30.2391	29.5386	29.9591	30.5413	30.3598	30.2544	29.6144	29.8524	29.536
	0.20426	-0.0783157	tr|E2QXR8|E2QXR8_CANLF	tr|E2QXR8|E2QXR8_CANLF					13	8	8	45.4	34.8	34.8	47.655	0	229.19	77764000000	221	31.8717	31.9004	31.5495	31.2089	31.5847	31.086	31.5441	31.5943	31.5318	31.6454	31.7435	31.7531
	0.505525	-0.356808	tr|E2QXS5|E2QXS5_CANLF	tr|E2QXS5|E2QXS5_CANLF					6	6	6	17.5	17.5	17.5	61.663	0	41.961	2249700000	31	26.6944	26.7593	26.0023	26.3332	27.0912	NaN	26.8348	NaN	NaN	27.031	NaN	27.3703
	1.10742	0.370539	tr|E2QXS6|E2QXS6_CANLF	tr|E2QXS6|E2QXS6_CANLF					4	4	4	12.2	12.2	12.2	49.139	0	12.331	2497400000	19	26.5904	26.9781	26.6909	27.3849	27.4144	NaN	26.6041	26.7824	26.4055	26.7545	26.6593	26.6676
	0.231851	0.0578752	tr|E2QXS7|E2QXS7_CANLF	tr|E2QXS7|E2QXS7_CANLF					16	16	16	39.7	39.7	39.7	47.749	0	309.47	37129000000	298	29.8353	30.1712	30.1208	30.184	29.9369	29.8154	29.6974	29.9439	30.0309	30.1624	29.9289	30.0289
	0.354573	-0.148176	tr|E2QXS8|E2QXS8_CANLF;tr|F1PUS8|F1PUS8_CANLF	tr|E2QXS8|E2QXS8_CANLF;tr|F1PUS8|F1PUS8_CANLF					7	7	7	14.5	14.5	14.5	95.749	0	112	3247400000	83	27.6338	27.3452	27.5461	27.1173	26.5434	27.0416	27.4662	27.3967	27.1904	27.3524	27.358	26.5068
	0.121659	0.0537939	tr|E2QXT3|E2QXT3_CANLF	tr|E2QXT3|E2QXT3_CANLF					10	10	10	13.7	13.7	13.7	108.01	0	50.243	5928800000	59	28.3339	27.923	28.2197	28.0162	28.1487	27.6843	28.1665	28.1366	28.3666	27.7585	27.5744	27.8284
	0.10752	0.0682913	tr|E2QXT5|E2QXT5_CANLF	tr|E2QXT5|E2QXT5_CANLF					4	4	4	33.6	33.6	33.6	14.389	0	19.007	4527800000	41	28.5666	27.5896	27.6506	27.1452	27.5658	27.4993	27.4801	27.7351	27.9186	27.2402	27.6322	27.3581
	0.326736	-0.0775573	tr|E2QXU5|E2QXU5_CANLF	tr|E2QXU5|E2QXU5_CANLF					27	27	27	53.1	53.1	53.1	58.891	0	323.31	103270000000	448	32.2601	32.2995	32.1444	31.8223	31.9135	31.9306	32.34	32.1625	32.103	32.0131	32.0778	31.9349
	0.257545	0.128025	tr|E2QXV1|E2QXV1_CANLF	tr|E2QXV1|E2QXV1_CANLF					49	49	48	36.8	36.8	36.4	211.84	0	323.31	108220000000	788	32.6225	32.3527	32.4433	32.1513	31.8931	32.0824	32.5056	32.2552	32.5008	31.571	31.8149	31.5371
	0.102857	0.0566367	tr|E2QXV5|E2QXV5_CANLF	tr|E2QXV5|E2QXV5_CANLF					20	20	20	21.5	21.5	21.5	137.09	0	309.54	8572200000	113	28.1328	28.0592	28.4156	28.3289	28.9389	28.5041	27.8912	28.1663	28.3472	28.8947	28.4004	28.8711
	0.848814	0.135463	tr|E2QXW6|E2QXW6_CANLF	tr|E2QXW6|E2QXW6_CANLF					22	22	22	24.3	24.3	24.3	160.34	0	158.88	11733000000	160	29.319	29.0563	28.8937	28.9941	29.0681	28.8451	28.8966	28.9547	28.8233	28.7854	29.0096	28.7538
	2.12609	-0.354987	tr|E2QXX0|E2QXX0_CANLF	tr|E2QXX0|E2QXX0_CANLF					8	8	8	25.8	25.8	25.8	29.779	0	34.665	7397000000	83	28.2766	27.8954	28.2216	28.3024	28.3328	28.0385	28.6815	28.6925	28.4457	28.5501	28.2948	28.4444
	0.194424	0.107713	tr|E2QXX4|E2QXX4_CANLF;tr|J9NWB3|J9NWB3_CANLF	tr|E2QXX4|E2QXX4_CANLF;tr|J9NWB3|J9NWB3_CANLF					16	16	16	38.8	38.8	38.8	70.857	0	323.31	12396000000	142	28.5114	28.9441	29.2278	29.6115	29.6393	29.4566	28.7057	29.1654	29.2167	29.1631	29.3693	29.1918
	0.426587	-0.130016	tr|E2QXY5|E2QXY5_CANLF	tr|E2QXY5|E2QXY5_CANLF					21	20	2	37	35.2	3.2	96.958	0	323.31	29329000000	306	30.7673	30.4415	30.1873	30.326	30.238	30.1893	30.2678	30.3635	30.3505	30.6117	30.8478	30.4569
	0.706157	-0.136259	tr|E2QXY7|E2QXY7_CANLF	tr|E2QXY7|E2QXY7_CANLF					13	13	13	34.3	34.3	34.3	45.396	0	203.72	86621000000	261	31.5334	31.4894	31.3626	31.3984	31.6485	31.3311	31.4212	31.3948	31.5838	31.7065	31.8777	31.7303
	0.256756	0.0974959	tr|E2QXZ1|E2QXZ1_CANLF;tr|J9P6E2|J9P6E2_CANLF	tr|E2QXZ1|E2QXZ1_CANLF;tr|J9P6E2|J9P6E2_CANLF					13	13	13	35.2	35.2	35.2	48.64	0	205.24	41348000000	192	30.6852	30.9831	30.9457	30.324	31.0278	30.3225	30.5193	30.5472	30.7136	30.4808	30.8253	30.7323
	0.00905037	0.00266221	tr|E2QXZ2|E2QXZ2_CANLF	tr|E2QXZ2|E2QXZ2_CANLF					21	21	21	24.7	24.7	24.7	123.35	0	323.31	59665000000	327	30.9705	31.1036	31.0002	31.1205	30.8304	30.9085	31.1094	31.0147	31.2023	30.6388	30.9662	30.4113
	0.610371	-0.291471	tr|E2QY01|E2QY01_CANLF	tr|E2QY01|E2QY01_CANLF					6	6	6	21.3	21.3	21.3	30.569	0	10.11	5420200000	32	28.164	28.1168	27.7664	27.5073	27.5596	26.8962	27.8675	27.7664	27.8157	27.9514	28.3984	27.8604
	0.0496996	0.0418184	tr|E2QY04|E2QY04_CANLF;tr|F1Q235|F1Q235_CANLF	tr|E2QY04|E2QY04_CANLF					9	9	9	38.3	38.3	38.3	44.25	0	153.56	13943000000	154	28.7719	28.6057	28.3353	29.6777	29.3547	29.6192	28.5286	28.7566	29.0239	29.4661	29.3195	29.6685
	0.0417567	-0.0124912	tr|E2QY07|E2QY07_CANLF;tr|E2QY08|E2QY08_CANLF	tr|E2QY07|E2QY07_CANLF;tr|E2QY08|E2QY08_CANLF					56	38	34	71.6	52.7	50.1	102.95	0	323.31	159820000000	767	32.433	32.6453	32.6525	32.3209	32.7393	32.3503	32.2847	32.5594	32.5718	32.7593	32.5051	32.8677
	0.061903	0.0568425	tr|E2QY18|E2QY18_CANLF	tr|E2QY18|E2QY18_CANLF					2	2	2	6.3	6.3	6.3	26.428	0.0021893	2.5029	1495400000	33	26.5958	NaN	25.8459	NaN	NaN	NaN	26.2204	NaN	26.3161	25.9554	NaN	25.6924
	1.48747	-0.0914945	tr|E2QY23|E2QY23_CANLF	tr|E2QY23|E2QY23_CANLF					19	19	16	54	54	47.5	37.628	0	308.3	135870000000	414	32.5049	32.328	32.3782	32.3484	32.4474	32.3959	32.5009	32.493	32.5659	32.4782	32.4217	32.6353
	1.57454	0.314732	tr|E2QY29|E2QY29_CANLF	tr|E2QY29|E2QY29_CANLF					5	5	5	15.6	15.6	15.6	50.63	0	101.68	2805900000	49	26.8021	26.6614	27.1276	26.7448	26.6148	27.1819	26.7169	26.5512	26.5678	26.4093	26.4584	26.7286
	0.766378	-0.252444	tr|E2QY30|E2QY30_CANLF	tr|E2QY30|E2QY30_CANLF					10	9	9	41	36.7	36.7	24.163	0	84.005	37274000000	167	29.6132	30.2711	30.1072	29.953	30.3292	29.6111	30.1806	30.0935	30.0521	30.6304	30.2098	30.5151
	0.0427274	0.0238018	tr|J9P388|J9P388_CANLF;tr|E2QY31|E2QY31_CANLF	tr|J9P388|J9P388_CANLF;tr|E2QY31|E2QY31_CANLF					8	8	8	26.8	26.8	26.8	46.621	0	66.026	16624000000	52	29.5234	29.5006	29.3154	30.0099	29.1729	29.6856	29.8484	29.7936	29.5841	28.9639	29.3642	29.2569
	0.0746424	-0.0602107	tr|E2QY43|E2QY43_CANLF	tr|E2QY43|E2QY43_CANLF					8	8	8	22.8	22.8	22.8	39.574	0	36.869	16714000000	84	29.8816	29.686	29.588	28.8574	28.4135	28.7907	29.2666	29.4548	29.6275	28.8505	29.1158	28.5463
	1.16342	0.381758	tr|E2QY46|E2QY46_CANLF;tr|J9P4U9|J9P4U9_CANLF	tr|E2QY46|E2QY46_CANLF;tr|J9P4U9|J9P4U9_CANLF					15	15	15	92.2	92.2	92.2	25.719	0	323.31	33441000000	206	30.907	30.6741	30.4594	30.9849	30.1334	30.5811	30.5519	30.3238	30.4548	29.8328	30.0445	30.0136
	2.11176	0.231971	tr|E2QY54|E2QY54_CANLF	tr|E2QY54|E2QY54_CANLF					5	5	5	36.4	36.4	36.4	18.943	0	122.85	55819000000	215	31.0507	31.3216	31.169	31.1781	31.3627	31.2134	30.9993	30.9156	30.8434	31.1374	31.024	31.2435
	0.548346	-0.196253	tr|E2R5X2|E2R5X2_CANLF;tr|E2QY55|E2QY55_CANLF	tr|E2R5X2|E2R5X2_CANLF;tr|E2QY55|E2QY55_CANLF					11	11	11	44.1	44.1	44.1	42.894	0	323.31	34736000000	246	30.0707	30.5765	30.1804	30.3608	30.6845	30.3781	30.567	30.6412	30.0144	30.9215	30.7132	30.9952
	0.222393	0.0742359	tr|E2QY58|E2QY58_CANLF	tr|E2QY58|E2QY58_CANLF					7	7	7	17.4	17.4	17.4	72.744	0	76.526	4693800000	62	27.8032	27.7223	27.5507	28.1073	27.4049	27.4554	27.3894	27.7778	27.7669	27.511	27.5537	28.1201
	0.870989	-0.264501	tr|E2QY66|E2QY66_CANLF	tr|E2QY66|E2QY66_CANLF					3	3	3	18.3	18.3	18.3	38.571	0	33.765	5259900000	36	28.1052	27.7284	27.9226	NaN	27.8771	27.4162	28.3299	28.0914	28.2927	27.7775	27.8805	27.9614
	0.267926	0.122772	tr|L7N0I1|L7N0I1_CANLF;tr|E2QY85|E2QY85_CANLF;tr|F1P634|F1P634_CANLF;tr|J9NV76|J9NV76_CANLF;tr|J9P960|J9P960_CANLF;tr|J9NWA5|J9NWA5_CANLF	tr|L7N0I1|L7N0I1_CANLF;tr|E2QY85|E2QY85_CANLF;tr|F1P634|F1P634_CANLF					9	9	9	62.2	62.2	62.2	19.793	0	323.31	38564000000	141	30.072	30.5798	30.3961	30.1219	30.7411	30.2195	29.7357	30.4117	30.2241	30.7298	30.0602	30.7975
	0.187035	0.0507828	tr|E2QY93|E2QY93_CANLF	tr|E2QY93|E2QY93_CANLF					14	14	14	30.9	30.9	30.9	63.1	0	323.31	41819000000	260	31.1037	30.473	30.8588	30.9775	30.9455	30.922	30.7841	30.8302	30.7667	31.0312	30.7342	31.1013
	1.87393	0.346451	tr|E2QY95|E2QY95_CANLF	tr|E2QY95|E2QY95_CANLF					29	12	12	67.9	34.9	34.9	49.091	0	254.83	44660000000	247	30.8524	31.1184	31.2808	30.7664	31.1442	30.8349	30.5883	30.5371	30.5475	30.6832	30.9094	30.4198
	0.0593498	-0.0305745	tr|E2QY99|E2QY99_CANLF	tr|E2QY99|E2QY99_CANLF					11	11	11	25.8	25.8	25.8	77.231	0	255.66	10428000000	97	28.1386	28.8845	29.0661	28.6582	28.6661	28.5763	29.0255	28.947	28.4865	28.3372	28.6815	28.7816
	0.600764	0.29225	tr|J9P6J2|J9P6J2_CANLF;tr|E2QYA7|E2QYA7_CANLF	tr|J9P6J2|J9P6J2_CANLF;tr|E2QYA7|E2QYA7_CANLF					3	3	3	5.2	5.2	5.2	90.577	0	30.067	1340700000	28	NaN	25.8325	25.4236	25.7101	26.2356	25.8972	25.0829	25.5745	25.5947	26.1964	25.1894	26.3666
	0.126008	-0.0594053	tr|E2QYB4|E2QYB4_CANLF;tr|J9P7Y7|J9P7Y7_CANLF	tr|E2QYB4|E2QYB4_CANLF;tr|J9P7Y7|J9P7Y7_CANLF					17	17	17	20.9	20.9	20.9	145.69	0	70.646	6961600000	62	28.88	28.383	28.2478	28.5915	27.9521	28.0823	28.74	28.4112	28.3901	28.0945	28.4419	28.4244
	0.179563	-0.0653397	tr|E2QYC2|E2QYC2_CANLF	tr|E2QYC2|E2QYC2_CANLF					16	7	6	46.4	27.4	24.2	49.867	0	143.36	8907000000	75	28.7028	28.5862	28.5592	28.4566	28.2639	28.6628	28.7235	28.8824	28.8704	28.271	28.2723	28.4217
	2.05449	0.36518	tr|E2QYC7|E2QYC7_CANLF;tr|E2QYC5|E2QYC5_CANLF	tr|E2QYC7|E2QYC7_CANLF;tr|E2QYC5|E2QYC5_CANLF					19	19	18	29.5	29.5	27.6	103.17	0	168.23	10805000000	129	29.113	29.0177	28.7391	29.2075	28.9018	28.8098	28.83	28.6202	28.7042	28.3705	28.4733	28.454
	0.649865	0.18534	tr|E2QYC8|E2QYC8_CANLF;tr|F1P604|F1P604_CANLF	tr|E2QYC8|E2QYC8_CANLF					7	7	7	27.4	27.4	27.4	48.421	0	247.2	7354500000	90	28.2756	28.2589	28.6218	28.4624	28.6287	28.4181	28.6475	28.4511	28.2586	27.9033	28.0341	28.1174
	0.429745	0.326927	tr|E2QYD0|E2QYD0_CANLF	tr|E2QYD0|E2QYD0_CANLF					4	4	4	23	23	23	29.247	0	27.308	1112600000	35	24.9338	25.8303	26.0784	26.0739	NaN	NaN	24.5923	25.8222	25.7054	25.3603	25.5306	24.8003
	2.41466	-0.289083	tr|E2QYD2|E2QYD2_CANLF	tr|E2QYD2|E2QYD2_CANLF					18	18	18	50.3	50.3	50.3	40.651	0	323.31	259720000000	552	33.6292	33.2213	33.362	33.551	33.6242	33.5372	33.7566	33.7765	33.7256	33.7995	33.8246	33.869
	1.6054	0.381805	tr|E2QYD3|E2QYD3_CANLF	tr|E2QYD3|E2QYD3_CANLF					9	9	9	26.1	26.1	26.1	42.387	0	129.62	53859000000	202	31.1692	31.0824	31.4097	31.509	31.4146	31.4623	30.6756	30.7765	30.8205	31.3814	31.143	31.3592
	0.957455	-0.257074	tr|E2QYD8|E2QYD8_CANLF;tr|J9P9Q2|J9P9Q2_CANLF	tr|E2QYD8|E2QYD8_CANLF					6	6	6	40	40	40	12.538	0	43.63	39800000000	109	30.9587	30.6222	30.3984	30.9901	30.3686	30.6533	31.2177	30.7863	30.7268	30.8415	31.0392	30.9673
	0.373528	0.0912521	tr|E2QYD9|E2QYD9_CANLF	tr|E2QYD9|E2QYD9_CANLF					15	15	15	50.8	50.8	50.8	41.828	0	323.31	44549000000	190	30.7025	30.9405	31.0145	31.149	31.23	31.0804	30.7984	30.9418	30.7481	30.964	31.1889	31.0709
	0.844471	-0.141238	tr|E2QYF3|E2QYF3_CANLF	tr|E2QYF3|E2QYF3_CANLF					36	36	36	46.8	46.8	46.8	89.799	0	323.31	120330000000	638	32.4834	32.2501	32.0969	32.484	32.2545	32.4449	32.3906	32.3781	32.3929	32.5719	32.6508	32.6626
	0.964438	0.204756	tr|E2QYG3|E2QYG3_CANLF;tr|J9NVT4|J9NVT4_CANLF	tr|E2QYG3|E2QYG3_CANLF;tr|J9NVT4|J9NVT4_CANLF					14	14	14	24.9	24.9	24.9	100.79	0	90.929	7465400000	125	28.6844	28.334	28.7021	28.8394	28.2647	28.3162	28.3358	28.2373	28.3419	28.4185	28.2601	28.4041
	0.410357	-0.163864	tr|E2QYG4|E2QYG4_CANLF	tr|E2QYG4|E2QYG4_CANLF					6	6	6	10.5	10.5	10.5	85.76	0	163.76	5740400000	69	28.2675	27.4093	27.7681	28.3063	27.9046	28.3254	28.1709	27.8805	28.2471	28.1588	28.3463	28.4103
	1.29067	0.342091	tr|E2QYG6|E2QYG6_CANLF	tr|E2QYG6|E2QYG6_CANLF					21	21	21	47.1	47.1	47.1	68.401	0	323.31	64235000000	558	31.0188	31.4365	31.5837	31.2603	31.7373	31.2737	30.6429	31.0231	31.1017	31.2983	31.1488	31.2201
	0.124978	0.0231544	tr|J9NSV5|J9NSV5_CANLF;tr|E2QYH2|E2QYH2_CANLF	tr|J9NSV5|J9NSV5_CANLF;tr|E2QYH2|E2QYH2_CANLF					6	6	6	43.3	43.3	43.3	26.725	0	323.31	19733000000	142	29.9306	29.8059	29.7741	29.9524	29.5559	29.8672	29.8128	29.6732	29.8062	29.8267	29.8371	29.9303
	0.559615	-0.518678	tr|E2RDU6|E2RDU6_CANLF;tr|E2QYH5|E2QYH5_CANLF	tr|E2RDU6|E2RDU6_CANLF;tr|E2QYH5|E2QYH5_CANLF					1	1	1	5.2	5.2	5.2	26.25	0	75.239	16865000000	57	30.9871	29.5363	29.9427	28.5043	28.9275	28.8569	30.0875	30.3897	30.2987	29.3002	29.8131	29.5111
	2.11667	-0.266353	tr|E2QYH6|E2QYH6_CANLF	tr|E2QYH6|E2QYH6_CANLF					35	35	21	32.4	32.4	18.4	117.53	0	323.31	275530000000	770	33.6726	33.769	33.648	33.5219	33.4528	33.523	34.0376	33.8077	33.9907	33.7294	33.7557	33.6845
	2.3343	0.89156	tr|E2QYH9|E2QYH9_CANLF	tr|E2QYH9|E2QYH9_CANLF					3	3	3	9.6	9.6	9.6	52.392	0	70.504	1756500000	46	NaN	26.8121	27.0522	26.1693	26.7393	26.6588	NaN	NaN	25.6299	25.8367	25.9177	25.7805
	0.399358	-0.159866	tr|E2QYJ3|E2QYJ3_CANLF	tr|E2QYJ3|E2QYJ3_CANLF					6	4	4	14.4	10.4	10.4	58.858	0	27.373	5170300000	39	28.012	27.8063	27.4695	27.4971	27.9189	27.9257	28.2844	27.4326	28.29	27.7832	27.8669	28.0163
	2.47871	-0.285309	tr|E2QYJ4|E2QYJ4_CANLF	tr|E2QYJ4|E2QYJ4_CANLF					4	4	4	53.6	53.6	53.6	14.523	0	323.31	7396700000	102	27.9168	28.193	28.2504	28.0376	28.1471	27.9612	28.4494	28.4435	28.3533	28.3944	28.2077	28.2602
	0.215682	0.114704	tr|E2QYK6|E2QYK6_CANLF	tr|E2QYK6|E2QYK6_CANLF					10	10	10	47.1	47.1	47.1	22.252	0	118.24	20029000000	96	29.9743	30.3344	30.3443	29.172	29.5404	29.7656	29.6926	29.8038	29.7827	29.5108	29.9124	28.9769
	0.368778	-0.123014	tr|E2QYK9|E2QYK9_CANLF	tr|E2QYK9|E2QYK9_CANLF					28	28	28	29.1	29.1	29.1	155.91	0	323.31	26828000000	354	30.4645	30.4922	30.2772	30.287	30.1002	30.1621	30.7118	30.5545	30.5972	29.8963	30.3413	30.0958
	0.0923638	-0.0704872	tr|E2QYL0|E2QYL0_CANLF	tr|E2QYL0|E2QYL0_CANLF					10	10	10	44.2	44.2	44.2	25.226	0	323.31	189220000000	348	32.5493	32.4673	32.8557	33.0974	33.5466	33.2371	32.4401	33.0641	32.5602	33.5189	33.5637	33.5463
	0.66198	-0.219312	tr|E2QYM4|E2QYM4_CANLF	tr|E2QYM4|E2QYM4_CANLF					10	10	10	22.9	22.9	22.9	62.108	0	150.88	7870700000	114	28.5591	28.2512	28.2768	28.8133	28.5417	29.1347	28.9211	28.5279	28.8354	28.9316	28.8613	28.7607
	1.53392	-0.287293	tr|E2QYN0|E2QYN0_CANLF	tr|E2QYN0|E2QYN0_CANLF					4	4	4	13.6	13.6	13.6	38.647	0	11.593	2282100000	26	26.3367	26.766	26.3412	26.6563	26.6611	26.5181	26.6195	26.9547	26.868	NaN	26.8933	NaN
	0.988983	-0.905817	tr|E2QYN4|E2QYN4_CANLF	tr|E2QYN4|E2QYN4_CANLF					6	6	6	42.5	42.5	42.5	12.17	0	8.6926	99436000000	64	32.8362	30.181	32.2606	32.0318	32.6737	32.9963	33.6207	32.7488	33.1812	33.2562	32.5385	32.7852
	0.39037	-0.18524	tr|E2QYN6|E2QYN6_CANLF	tr|E2QYN6|E2QYN6_CANLF					2	2	2	22.1	22.1	22.1	16.05	0	26.217	5132200000	40	28.0755	27.8836	27.8148	NaN	28.356	27.6113	27.6606	28.4427	27.8404	28.5474	28.1763	28.4581
[truncated: 3,735 more rows]

## Sheet: 6b. PTEN proteome 8h
Significant	-log(P-value)	Difference	Protein IDs	Majority protein IDs	Protein names	Only identified by site	Reverse	Potential contaminant	Peptides	Razor + unique peptides	Unique peptides	Sequence coverage [%]	Unique + razor sequence coverage [%]	Unique sequence coverage [%]	Mol. weight [kDa]	Q-value	Score	Intensity	MS/MS count	LFQ intensity 8h_1	LFQ intensity 8h_2	LFQ intensity 8h_3	LFQ intensity 8h_4	LFQ intensity 8h_5	LFQ intensity 8h_6	LFQ intensity ctrl_1	LFQ intensity ctrl_2	LFQ intensity ctrl_3	LFQ intensity ctrl_4	LFQ intensity ctrl_5	LFQ intensity ctrl_6
[truncated: 4,258 more rows]

[truncated: 2 more sheets: 6c. PTEN proteome 12h, Abbreviations]
