# Supplementary material for: Apicobasal Surfaceome Architecture Encodes for Polarized Epithelial Functionality and Depends on Tumor Suppressor PTEN
Source: Int J Mol Sci. 2022 Dec 19;23(24):16193. doi: 10.3390/ijms232416193 (PMC9788433; doi:10.3390/ijms232416193)
Supplement: Supplementary file 1 [file ijms-23-16193-s001.zip › Table S3_MS sample annotations.xlsx]

## Sheet: Sample annotations
Figure 2 & 3: Apicobasal surfaceome
	Surfaceome enrichment
	AP-H / BL-L	Replicate fw1	kanika_Z_1709_065
	AP-H / BL-L	Replicate fw2	kanika_Z_1709_066
	BL-H / AP-L	Replicate rv1	kanika_Z_1709_070
	BL-H / AP-L	Replicate rv2	kanika_Z_1709_071
	Unbound fraction
	AP-H / BL-L	Replicate fw1	kanika_Z_1709_094
	AP-H / BL-L	Replicate fw2	kanika_Z_1709_095
	BL-H / AP-L	Replicate rv1	kanika_Z_1709_099
	BL-H / AP-L	Replicate rv2	kanika_Z_1709_100
	SILAC incorporation
	Heavy lysate		kanika_X1709_045
	Light lysate		kanika_X1709_046
	Mixed lysate		kanika_X1709_047
Figure 4: Apicobasal protein sorting
	BL control	Replicate 1	kanika_Z1710_006
	BL control	Replicate 2	kanika_Z1710_007
	BL control	Replicate 3	kanika_Z1710_008
	BL Tannic acid	Replicate 1	kanika_Z1710_011
	BL Tannic acid	Replicate 2	kanika_Z1710_012
	BL Tannic acid	Replicate 3	kanika_Z1710_013
	AP control	Replicate 1	kanika_Z1710_016
	AP control	Replicate 2	kanika_Z1710_017
	AP control	Replicate 3	kanika_Z1710_018
	AP Tannic acid	Replicate 1	kanika_Z1710_021
	AP Tannic acid	Replicate 2	kanika_Z1710_022
	AP Tannic acid	Replicate 3	kanika_Z1710_023
Figure 5: PTEN surfaceome
	AP + SF1670 4h	Replicate 1	kanika_Z1804_019
	AP + SF1670 4h	Replicate 2	kanika_Z1804_020
	AP + SF1670 4h	Replicate 3	kanika_Z1804_021
	AP Control 4h	Replicate 1	kanika_Z1804_028
	AP Control 4h	Replicate 2	kanika_Z1804_029
	AP Control 4h	Replicate 3	kanika_Z1804_030
	AP + SF1670 + LY294002 4h	Replicate 1	kanika_Z1804_023
	AP + SF1670 + LY294003 4h	Replicate 2	kanika_Z1804_024
	AP + SF1670 + LY294004 4h	Replicate 3	kanika_Z1804_025
	BL + SF1670 4h	Replicate 1	kanika_Z1808_201
	BL + SF1670 4h	Replicate 2	kanika_Z1808_202
	BL + SF1670 4h	Replicate 3	kanika_Z1808_203
	BL Control 4h	Replicate 1	kanika_Z1808_205
	BL Control 4h	Replicate 2	kanika_Z1808_206
	BL Control 4h	Replicate 3	kanika_Z1808_207
	BL + SF1670 12h	Replicate 1	kanika_Z1808_193
	BL + SF1670 12h	Replicate 2	kanika_Z1808_194
	BL + SF1670 12h	Replicate 3	kanika_Z1808_195
	BL Control 12h	Replicate 1	kanika_Z1808_205
	BL Control 12h	Replicate 2	kanika_Z1808_206
	BL Control 12h	Replicate 3	kanika_Z1808_207
Figure 6: PTEN proteome
	Lysate + SF1670 12h	Replicate 1	kanika_Z1809_033
	Lysate + SF1670 12h	Replicate 2	kanika_Z1809_034
	Lysate + SF1670 12h	Replicate 3	kanika_Z1809_035
	Lysate + SF1670 12h	Replicate 4	kanika_Z1809_036
	Lysate + SF1670 12h	Replicate 5	kanika_Z1809_037
	Lysate + SF1670 12h	Replicate 6	kanika_Z1809_038
	Lysate + SF1670 8h	Replicate 1	kanika_Z1809_040
	Lysate + SF1670 8h	Replicate 2	kanika_Z1809_041
	Lysate + SF1670 8h	Replicate 3	kanika_Z1809_042
	Lysate + SF1670 8h	Replicate 4	kanika_Z1809_044
	Lysate + SF1670 8h	Replicate 5	kanika_Z1809_045
	Lysate + SF1670 8h	Replicate 6	kanika_Z1809_046
	Lysate + SF1670 4h	Replicate 1	kanika_Z1809_048
	Lysate + SF1670 4h	Replicate 2	kanika_Z1809_057
	Lysate + SF1670 4h	Replicate 3	kanika_Z1809_058
	Lysate + SF1670 4h	Replicate 4	kanika_Z1809_059
	Lysate + SF1670 4h	Replicate 5	kanika_Z1809_060
	Lysate + SF1670 4h	Replicate 6	kanika_Z1809_061
	Lysate Control	Replicate 1	kanika_Z1809_063
	Lysate Control	Replicate 2	kanika_Z1809_064
	Lysate Control	Replicate 3	kanika_Z1809_065
	Lysate Control	Replicate 4	kanika_Z1809_066
	Lysate Control	Replicate 5	kanika_Z1809_067
	Lysate Control	Replicate 6	kanika_Z1809_068

## Sheet: Abbreviations
AP	Apical
BL	Basolateral
H	Heavy (SILAC)
L	Light (SILAC)
fw	Forward (SILAC label switch)
rv	Reverse (SILAC label switch)
h	hours of treatment
SF1670	PTEN inhibitor
LY294002	PI3K inhibitor
